# Supplementary material for: Integrated assessment of environmental impact of Europe in 2010: data sources and extrapolation strategies for calculating normalisation factors
Source: Springer Nature journal article supplement (doi:10.1007/s11367-015-0958-8), 2015-08-27
Supplement: MOESM2 [file 5820714]

## Sheet: intro
	The sheet "NFs2010ECJRCv1.1" contains:
		Inventory data and their sources
		ILCD characterisation factors
		Normalisation factors
		Contribution analysis
	The sheet "unmapped" reports the substances for which data at the inventory where available but there were not mapped into ILCD
	The sheet "inventory only" reports elementary flows mapped in ILCD but missing a characterisation factor

## Sheet: NFs2010ECJRCv1.1
Name of flow data set - ILCD compliant	Name of flow data set - Statistics	Additional Specification	Compartment	Elementary flow category, level 3	UUID	Inventory 2010	Unit	Source 1	Source 2	Source 3	Inventory.Method	Method short name	Characterization factors as from ILCD															TOTALS EU27 2010 v1.1 (normalisation factors)															CONTRIBUTION ANALYSIS EU27 2010 v1.1 (normalisation factors)
																												4.60043e+12	1.08435e+07	18777.9	268897	1.87209e+09	5.64217e+11	1.58069e+10	2.35618e+10	8.75682e+10	7.41349e+08	8.4377e+09	3.78032e+13	4.4556e+12	4.06035e+10	5.04692e+07	1	1	1	1	1	1	1
													Climate change midpoint	Ozone depletion midpoint	Human toxicity midpoint, cancer effects	Human toxicity midpoint, non-cancer effects	Particulate matter/Respiratory inorganics midpoint	Ionizing radiation midpoint, human health	Photochemical ozone formation midpoint, human health	Acidification midpoint	Eutrophication terrestrial midpoint	Eutrophication freshwater midpoint	Eutrophication marine midpoint	Land use midpoint	Ecotoxicity freshwater midpoint	Resource depletion water, midpoint	Resource depletion, mineral, fossils and renewables, midpoint	Climate change midpoint	Ozone depletion midpoint	Human toxicity midpoint, cancer effects	Human toxicity midpoint, non-cancer effects	Particulate matter/Respiratory inorganics midpoint	Ionizing radiation midpoint, human health	Photochemical ozone formation midpoint, human health	Acidification midpoint	Eutrophication terrestrial midpoint	Eutrophication freshwater midpoint	Eutrophication marine midpoint	Land use midpoint	Ecotoxicity freshwater midpoint	Resource depletion water, midpoint	Resource depletion, mineral, fossils and renewables, midpoint	Climate change midpoint	Ozone depletion midpoint	Human toxicity midpoint, cancer effects	Human toxicity midpoint, non-cancer effects	Particulate matter/Respiratory inorganics midpoint	Ionizing radiation midpoint, human health	Photochemical ozone formation midpoint, human health
(1α,4α,4aβ,5β,8β8aβ)-1,2,3,4,10,10-hexachloro-1,4,4a,5,8,8a-hexahydro-1,4:5,8-dimethanonaphthalene	Isodrin	Industrial releases	emissions to soil	emissions to soil, unspecified	65d574d6-b298-448c-8c37-7c277c0177e3	0	kg	E-PRTR	Not applicable	Not applicable	Method E														2674.58			0	0	0	0	0	0	0	0	0	0	0	0	0	0	0	0	0	0	0	0	0	0
(1α,4α,4aβ,5β,8β8aβ)-1,2,3,4,10,10-hexachloro-1,4,4a,5,8,8a-hexahydro-1,4:5,8-dimethanonaphthalene	Isodrin	Industrial releases	emissions to air	emissions to air, unspecified	4b5662b1-f468-492e-99e0-94b0ccf370b5	0	kg	E-PRTR	Not applicable	Not applicable	Method C														2530.04			0	0	0	0	0	0	0	0	0	0	0	0	0	0	0	0	0	0	0	0	0	0
(1α,4α,4aβ,5β,8β8aβ)-1,2,3,4,10,10-hexachloro-1,4,4a,5,8,8a-hexahydro-1,4:5,8-dimethanonaphthalene	Isodrin	Industrial releases	emissions to water	emissions to water, unspecified	892fe18b-ec06-4fc8-a40c-6eab7b0d1038	309.46	kg	E-PRTR	EUROSTAT - economic data	Not applicable	Method D1	Toxic waterborne emissions													1.20879e+06			0	0	0	0	0	0	0	0	0	0	0	0	3.74071e+08	0	0	0	0	0	0	0	0	0
(2,4-dichlorophenoxy)acetic acid	2,4-D	Pesticides (surface water)	Emissions to water	Emissions to water, unspecified	fe0acd60-3ddc-11dd-a83b-0050c2490048	33327.1	kg	Literature	Eurostat - harvested areas	Not applicable	Method F	Pesticides				3.80029e-06									860.353			0	0	0	0.126653	0	0	0	0	0	0	0	0	2.86731e+07	0	0	0	0	0	4.71008e-07	0	0	0
(2,4-dichlorophenoxy)acetic acid	2,4-D	Pesticides (air)	Emissions to air	Emissions to air, unspecified	fe0acd60-3ddc-11dd-a835-0050c2490048	499906	kg	FAOstat - Pesticide usage data	Eurostat - harvested areas	Literature	Method F	Pesticides				2.78508e-06									106.169			0	0	0	1.39228	0	0	0	0	0	0	0	0	5.30748e+07	0	0	0	0	0	5.17775e-06	0	0	0
(2,4-dichlorophenoxy)acetic acid	2,4-D	Pesticides (soil)	Emissions to soil	Emissions to soil, unspecified	fe0acd60-3ddc-11dd-a834-0050c2490048	2.45548e+06	kg	FAOstat - Pesticide usage data	Eurostat - harvested areas	Literature	Method F	Pesticides				8.52325e-07									181.908			0	0	0	2.09286	0	0	0	0	0	0	0	0	4.4667e+08	0	0	0	0	0	7.78314e-06	0	0	0
(R)-2-(4-chloro-2-methylphenoxy)propionic acid	Mecoprop-P	Pesticides (surface water)	Emissions to water	Emissions to water, unspecified	5892355e-9647-42fe-afd0-00869b37152e	10034	kg	Literature	Eurostat - harvested areas	Not applicable	Method F	Pesticides													423.33			0	0	0	0	0	0	0	0	0	0	0	0	4.24769e+06	0	0	0	0	0	0	0	0	0
(R)-2-(4-chloro-2-methylphenoxy)propionic acid	Mecoprop-P	Pesticides (air)	Emissions to air	Emissions to air, unspecified	49c930d4-09e5-4759-b33b-529da407d3ad	150510	kg	FAOstat - Pesticide usage data	Eurostat - harvested areas	Literature	Method F	Pesticides													43.2296			0	0	0	0	0	0	0	0	0	0	0	0	6.50648e+06	0	0	0	0	0	0	0	0	0
(R)-2-(4-chloro-2-methylphenoxy)propionic acid	Mecoprop-P	Pesticides (soil)	Emissions to soil	Emissions to soil, unspecified	456652f8-0fa4-43c5-898c-afd832e61a1e	731786	kg	FAOstat - Pesticide usage data	Eurostat - harvested areas	Literature	Method F	Pesticides													124.973			0	0	0	0	0	0	0	0	0	0	0	0	9.14534e+07	0	0	0	0	0	0	0	0	0
[(3,5,6-trichloropyridin-2-yl)oxy]acetic acid	Triclopyr	Pesticides (surface water)	Emissions to water	Emissions to water, unspecified	b3fbbe1c-029f-4bc9-80ac-09c22628f102	313.37	kg	FAOstat - Pesticide usage data	Eurostat - harvested areas	Eurostat - organic farming areas	Method F														4875.29			0	0	0	0	0	0	0	0	0	0	0	0	1.52777e+06	0	0	0	0	0	0	0	0	0
[(3,5,6-trichloropyridin-2-yl)oxy]acetic acid	Triclopyr	Pesticides (air)	Emissions to air	Emissions to air, unspecified	689a8a2e-68bd-4aa9-a05d-031396a89c66	4700.55	kg	FAOstat - Pesticide usage data	Eurostat - harvested areas	Literature	Method F														833.878			0	0	0	0	0	0	0	0	0	0	0	0	3.91969e+06	0	0	0	0	0	0	0	0	0
[(3,5,6-trichloropyridin-2-yl)oxy]acetic acid	Triclopyr	Pesticides (soil)	Emissions to soil	Emissions to soil, unspecified	1affeaaa-4b6f-4b57-aee0-2d1e993d5435	23104.3	kg	FAOstat - Pesticide usage data	Eurostat - harvested areas	Eurostat - organic farming areas	Method F														1315.3			0	0	0	0	0	0	0	0	0	0	0	0	3.03892e+07	0	0	0	0	0	0	0	0	0
1-(tricyclohexylstannyl)-1H-1,2,4-triazole	Azocyclotin	Pesticides (surface water)	Emissions to water	Emissions to water, unspecified	5b3a3268-f39b-43bd-ba51-aa7fc963ef74	237.283	kg	FAOstat - Pesticide usage data	Eurostat - harvested areas	Eurostat - organic farming areas	Method F					0.000322488									174670			0	0	0	0.076521	0	0	0	0	0	0	0	0	4.14463e+07	0	0	0	0	0	2.84574e-07	0	0	0
1-(tricyclohexylstannyl)-1H-1,2,4-triazole	Azocyclotin	Pesticides (air)	Emissions to air	Emissions to air, unspecified	6a8143e0-4213-4b29-9ecd-c04036c64a79	3559.25	kg	FAOstat - Pesticide usage data	Eurostat - harvested areas	Literature	Method F					3.04635e-05									5355.37			0	0	0	0.108427	0	0	0	0	0	0	0	0	1.90611e+07	0	0	0	0	0	4.0323e-07	0	0	0
1-(tricyclohexylstannyl)-1H-1,2,4-triazole	Azocyclotin	Pesticides (soil)	Emissions to soil	Emissions to soil, unspecified	f1da32fa-a5ed-49f0-94ba-d6b04c93bb04	4745.67	kg	FAOstat - Pesticide usage data	Eurostat - harvested areas	Eurostat - organic farming areas	Method F					7.11658e-08									38.5457			0	0	0	0.000337729	0	0	0	0	0	0	0	0	182925	0	0	0	0	0	1.25598e-09	0	0	0
1,1,2,2-tetrachloroethane	1,1,2,2-tetrachloroethane	Industrial releases	emissions to soil	emissions to soil, unspecified	08a91e70-3ddc-11dd-9300-0050c2490048	0	kg	E-PRTR	Not applicable	Not applicable	Method E				5.47639e-07										34.0869			0	0	0	0	0	0	0	0	0	0	0	0	0	0	0	0	0	0	0	0	0	0
1,1,2,2-tetrachloroethane	1,1,2,2-tetrachloroethene	Industrial releases	emissions to water	emissions to water, unspecified	fe0acd60-3ddc-11dd-a317-0050c2490048	371.875	kg	E-PRTR	Not applicable	Not applicable	Method D				1.40285e-06										324.367			0	0	0.000521687	0	0	0	0	0	0	0	0	0	120624	0	0	0	0	2.7782e-08	0	0	0	0
1,1,2,2-tetrachloroethane	1,1,2,2-tetrachloroethane	Industrial releases	emissions to air	emissions to air, unspecified	fe0acd60-3ddc-11dd-a311-0050c2490048	5656.4	kg	E-PRTR	Not applicable	Not applicable	Method C	Toxic airborne emissions			1.39569e-06										6.30208			0	0	0.0078946	0	0	0	0	0	0	0	0	0	35647.1	0	0	0	0	4.20421e-07	0	0	0	0
1,1,2-trichloroethane	1,1,2-trichloroethane		emissions to water	emissions to water, unspecified	fe0acd60-3ddc-11dd-a328-0050c2490048	0	kg	Not applicable	Not applicable	Not applicable	Method E				9.45443e-07	2.95248e-06									43.5496			0	0	0	0	0	0	0	0	0	0	0	0	0	0	0	0	0	0	0	0	0	0
1,1,2-trichloroethane	1,1,2-trichloroethane		emissions to soil	emissions to soil, unspecified	08a91e70-3ddc-11dd-9303-0050c2490048	0	kg	Not applicable	Not applicable	Not applicable	Method E				4.47596e-07	1.39778e-06									2.8736			0	0	0	0	0	0	0	0	0	0	0	0	0	0	0	0	0	0	0	0	0	0
1,1,2-trichlorotrifluoroethane	1,1,2-trichloro-1,2,2-trifluoroethane		emissions to air	emissions to air, unspecified	a3fe3630-a497-45c3-a1ed-7b20f9d6e51a	57983.4	kg	EMEP	E-PRTR	Literature	Method A	NMVOC breakdown estimates	6130	1		4.10289e-07												3.55438e+08	57983.4	0	0.0237899	0	0	0	0	0	0	0	0	0	0	0	7.7262e-05	0.00534729	0	8.84723e-08	0	0	0
1,1,3-trimethylcyclohexane	1,1,3-trimethylcyclohexane		emissions to air	emissions to air, unspecified	44060fda-3a43-4c07-af22-1e7acdfeeb71	4.02917e+06	kg	EMEP	E-PRTR	Literature	Method A	NMVOC breakdown estimates													0.00873583			0	0	0	0	0	0	0	0	0	0	0	0	35198.1	0	0	0	0	0	0	0	0	0
1,1-dimethylcyclohexane	1,1-dimethylcyclohexane		emissions to air	emissions to air, unspecified	c5ecddc7-cbd2-43d9-9543-1d82d71068f9	287180	kg	EMEP	E-PRTR	Literature	Method A	NMVOC breakdown estimates													0.0035674			0	0	0	0	0	0	0	0	0	0	0	0	1024.49	0	0	0	0	0	0	0	0	0
1,2,3-trimethylbenzene	1,2,3-trimethylbenzene		emissions to air	emissions to air, unspecified	08a91e70-3ddc-11dd-94c0-0050c2490048	3.70039e+07	kg	EMEP	E-PRTR	Literature	Method A	NMVOC breakdown estimates							2.14									0	0	0	0	0	0	7.91883e+07	0	0	0	0	0	0	0	0	0	0	0	0	0	0	0.00500974
1,2,4,5-tetramethylbenzene	1,2,4,5-tetramethylbenzene		emissions to air	emissions to air, unspecified	0fa4530a-9fda-4124-a536-b1bbb867ef8f	4.42745e+06	kg	EMEP	E-PRTR	Literature	Method A	NMVOC breakdown estimates													0.0237964			0	0	0	0	0	0	0	0	0	0	0	0	105357	0	0	0	0	0	0	0	0	0
1,2,4-trimethylbenzene	1,2,4-trimethylbenzene		emissions to air	emissions to air, unspecified	4d9a8790-3ddd-11dd-9cdb-0050c2490048	9.53049e+07	kg	EMEP	E-PRTR	Literature	Method A	NMVOC breakdown estimates			3.02411e-09				2.16						0.0391644			0	0	0.288212	0	0	0	2.05859e+08	0	0	0	0	0	3.73256e+06	0	0	0	0	1.53485e-05	0	0	0	0.0130234
1,2-dibromoethane	1,2-dibromoethane		emissions to water	emissions to water, unspecified	08a91e70-3ddc-11dd-9315-0050c2490048	0	kg	Not applicable	Not applicable	Not applicable	Not applicable				1.71128e-05	1.05384e-07									269.386			0	0	0	0	0	0	0	0	0	0	0	0	0	0	0	0	0	0	0	0	0	0
1,2-dibromoethane	1,2-dibromoethane		emissions to soil	emissions to soil, unspecified	08a91e70-3ddc-11dd-930e-0050c2490048	0	kg	Not applicable	Not applicable	Not applicable	Not applicable				6.84337e-06	4.40769e-08									14.6145			0	0	0	0	0	0	0	0	0	0	0	0	0	0	0	0	0	0	0	0	0	0
1,2-dichloroethane	1,2-Dichloroethane	Industrial releases	emissions to soil	emissions to soil, unspecified	08a91e70-3ddc-11dd-9318-0050c2490048	0	kg	Not applicable	Not applicable	Not applicable	Not applicable				2.89017e-07										1.18603			0	0	0	0	0	0	0	0	0	0	0	0	0	0	0	0	0	0	0	0	0	0
1,2-dichloroethane	1,2-dichloroethane	Industrial releases	emissions to water	emissions to water, unspecified	fe0acd60-3ddc-11dd-a74b-0050c2490048	766.52	kg	E-PRTR	EUROSTAT - economic data	Not applicable	Method D				1.63366e-06										15.1182			0	0	0.00125223	0	0	0	0	0	0	0	0	0	11588.4	0	0	0	0	6.66866e-08	0	0	0	0
1,2-dichloroethane	1,2-dichloroethane	Non-industrial releases	emissions to water	emissions to water, unspecified	fe0acd60-3ddc-11dd-a74b-0050c2490048	3351.49	kg	Waterbase	Eurostat - WWTP-connection stats	Not applicable	Method D2	Toxic waterborne emissions			1.63366e-06										15.1182			0	0	0.00547519	0	0	0	0	0	0	0	0	0	50668.6	0	0	0	0	2.91577e-07	0	0	0	0
1,2-dichloroethane	1,2-dichloroethane		emissions to air	emissions to air, unspecified	fe0acd60-3ddc-11dd-a745-0050c2490048	1007340	kg	EMEP	E-PRTR	Literature	Method A	NMVOC breakdown estimates			4.14623e-07										0.15163			0	0	0.417667	0	0	0	0	0	0	0	0	0	152743	0	0	0	0	2.22425e-05	0	0	0	0
1,2-dichloropropane & 1,3-dichloropropene	1,2-dichloropropane & 1,3-dichloropropene		emissions to water	emissions to water, unspecified	e2d36f52-0b1f-45e5-942f-fe76e11f61b5	0	kg	Not applicable	Not applicable	Not applicable	Not applicable														1603.34			0	0	0	0	0	0	0	0	0	0	0	0	0	0	0	0	0	0	0	0	0	0
1,2-dichloropropane & 1,3-dichloropropene	1,2-dichloropropane & 1,3-dichloropropene		emissions to soil	emissions to soil, unspecified	2ffdc62b-1c04-459d-9190-7c37450c2d23	0	kg	Not applicable	Not applicable	Not applicable	Not applicable														78.5027			0	0	0	0	0	0	0	0	0	0	0	0	0	0	0	0	0	0	0	0	0	0
1,2-dimethyl-3,5-diphenylpyrazolium methylsulphate	Difenzoquat	Pesticides (surface water)	Emissions to water	Emissions to water, unspecified	6201a043-ec8a-44a6-8e21-38234da15f84	1118.81	kg	FAOstat - Pesticide usage data	Eurostat - harvested areas	Eurostat - organic farming areas	Method F					2.14772e-07									923.01			0	0	0	0.000240289	0	0	0	0	0	0	0	0	1.03267e+06	0	0	0	0	0	8.93609e-10	0	0	0
1,2-dimethyl-3,5-diphenylpyrazolium methylsulphate	Difenzoquat	Pesticides (air)	Emissions to air	Emissions to air, unspecified	5c26e672-5cca-456c-ad1d-20e46764da2b	16782.1	kg	FAOstat - Pesticide usage data	Eurostat - harvested areas	Literature	Method F					3.57829e-07									28.5007			0	0	0	0.00600513	0	0	0	0	0	0	0	0	478304	0	0	0	0	0	2.23325e-08	0	0	0
1,2-dimethyl-3,5-diphenylpyrazolium methylsulphate	Difenzoquat	Pesticides (soil)	Emissions to soil	Emissions to soil, unspecified	6619f34e-383c-418e-b497-a0deda73b961	62484.6	kg	FAOstat - Pesticide usage data	Eurostat - harvested areas	Eurostat - organic farming areas	Method F					9.70039e-11									0.416887			0	0	0	6.06125e-06	0	0	0	0	0	0	0	0	26049	0	0	0	0	0	2.25411e-11	0	0	0
1,2-dimethylcyclohexane	1,2-dimethylcyclohexane		emissions to air	emissions to air, unspecified	dad0f624-82fd-43f8-83dd-8f70c8e00b9f	1.82361e+06	kg	EMEP	E-PRTR	Literature	Method A	NMVOC breakdown estimates													0.00757623			0	0	0	0	0	0	0	0	0	0	0	0	13816.1	0	0	0	0	0	0	0	0	0
1,3,5-trimethylbenzene	1,3,5-trimethylbenzene		emissions to air	emissions to air, unspecified	fe0acd60-3ddc-11dd-a282-0050c2490048	3.24164e+07	kg	EMEP	E-PRTR	Literature	Method A	NMVOC breakdown estimates							2.33						0.00765709			0	0	0	0	0	0	7.55301e+07	0	0	0	0	0	248215	0	0	0	0	0	0	0	0	0.00477831
1,3-dichloropropene	1,3-Dichloropropene	Pesticides (surface water)	Emissions to water	Emissions to water, unspecified	4d9a8790-3ddd-11dd-99da-0050c2490048	27927.2	kg	FAOstat - Pesticide usage data	Eurostat - harvested areas	Eurostat - organic farming areas	Method F				4.83776e-07	1.27655e-05									1983.17			0	0	0.0135105	0.356506	0	0	0	0	0	0	0	0	5.53844e+07	0	0	0	0	7.19492e-07	1.32581e-06	0	0	0
1,3-dichloropropene	1,3-Dichloropropene	Pesticides (air)	Emissions to air	Emissions to air, unspecified	4d9a8790-3ddd-11dd-99d4-0050c2490048	418908	kg	FAOstat - Pesticide usage data	Eurostat - harvested areas	Literature	Method F				5.28596e-07	0.000134262									0.366611			0	0	0.221433	56.2436	0	0	0	0	0	0	0	0	153577	0	0	0	0	1.17923e-05	0.000209164	0	0	0
1,3-dichloropropene	1,3-Dichloropropene	Pesticides (soil)	Emissions to soil	Emissions to soil, unspecified	fe0acd60-3ddc-11dd-a144-0050c2490048	558545	kg	FAOstat - Pesticide usage data	Eurostat - harvested areas	Eurostat - organic farming areas	Method F				5.99793e-08	1.12276e-05									71.9744			0	0	0.0335011	6.27111	0	0	0	0	0	0	0	0	4.02009e+07	0	0	0	0	1.78407e-06	2.33216e-05	0	0	0
1,3-dimethylcyclohexane	1,3-dimethylcyclohexane		emissions to air	emissions to air, unspecified	4d9a8790-3ddd-11dd-8dcd-0050c2490048	1.6312e+06	kg	EMEP	E-PRTR	Literature	Method A	NMVOC breakdown estimates													0.00302508			0	0	0	0	0	0	0	0	0	0	0	0	4934.5	0	0	0	0	0	0	0	0	0
1,4-dimethylcyclohexane	1,4-dimethylcyclohexane		emissions to air	emissions to air, unspecified	87efd6f6-7acb-41fc-8bdf-b7fcc9a979b5	4.12537e+06	kg	EMEP	E-PRTR	Literature	Method A	NMVOC breakdown estimates													0.00242915			0	0	0	0	0	0	0	0	0	0	0	0	10021.2	0	0	0	0	0	0	0	0	0
1,4-dioxane	dioxane		emissions to air	emissions to air, unspecified	08a91e70-3ddc-11dd-92f2-0050c2490048	2266.57	kg	EMEP	E-PRTR	Literature	Method A	NMVOC breakdown estimates			1.40821e-07										0.0616726			0	0	0.00031918	0	0	0	0	0	0	0	0	0	139.785	0	0	0	0	1.69977e-08	0	0	0	0
1-[2-(2,4-dichlorophenyl)pentyl]-1H-1,2,4-triazole	Penconazole	Pesticides (surface water)	Emissions to water	Emissions to water, unspecified	42ef42f6-515f-479c-85c3-299d519e2fb7	1480.68	kg	Literature	Eurostat - harvested areas	Not applicable	Method F	Pesticides				4.70681e-05									15148.1			0	0	0	0.0696926	0	0	0	0	0	0	0	0	2.24295e+07	0	0	0	0	0	2.59179e-07	0	0	0
1-[2-(2,4-dichlorophenyl)pentyl]-1H-1,2,4-triazole	Penconazole	Pesticides (air)	Emissions to air	Emissions to air, unspecified	3dc0776f-961a-4ac8-abd6-8a0c1c67c6f1	22210.1	kg	FAOstat - Pesticide usage data	Eurostat - harvested areas	Literature	Method F	Pesticides				2.21465e-06									411.429			0	0	0	0.0491876	0	0	0	0	0	0	0	0	9.1379e+06	0	0	0	0	0	1.82924e-07	0	0	0
1-[2-(2,4-dichlorophenyl)pentyl]-1H-1,2,4-triazole	Penconazole	Pesticides (soil)	Emissions to soil	Emissions to soil, unspecified	eaf06125-4616-4673-ad38-2507b925f8ea	29613.5	kg	FAOstat - Pesticide usage data	Eurostat - harvested areas	Literature	Method F	Pesticides				1.8121e-07									58.2669			0	0	0	0.00536627	0	0	0	0	0	0	0	0	1.72549e+06	0	0	0	0	0	1.99566e-08	0	0	0
1-butene	1-butene		emissions to air	emissions to air, unspecified	4d9a8790-3ddd-11dd-9b1e-0050c2490048	6.86202e+06	kg	EMEP	E-PRTR	Literature	Method A	NMVOC breakdown estimates							1.82									0	0	0	0	0	0	1.24889e+07	0	0	0	0	0	0	0	0	0	0	0	0	0	0	0.000790092
1-ethyl-2-methylbenzene	2-ethyltoluene		emissions to air	emissions to air, unspecified	08a91e70-3ddc-11dd-99bd-0050c2490048	571240	kg	EMEP	E-PRTR	Literature	Method A	NMVOC breakdown estimates							1.52									0	0	0	0	0	0	868285	0	0	0	0	0	0	0	0	0	0	0	0	0	0	5.49309e-05
1-ethyl-3,5-dimethylbenzene	1-ethyl-3,5-dimethylbenzene		emissions to air	emissions to air, unspecified	08a91e70-3ddc-11dd-9cc9-0050c2490048	5.7132e+06	kg	EMEP	E-PRTR	Literature	Method A	NMVOC breakdown estimates							2.23									0	0	0	0	0	0	1.27404e+07	0	0	0	0	0	0	0	0	0	0	0	0	0	0	0.000806006
1-ethyl-3-methylbenzene	3-ethyltoluene		emissions to air	emissions to air, unspecified	08a91e70-3ddc-11dd-99c1-0050c2490048	3.44628e+07	kg	EMEP	E-PRTR	Literature	Method A	NMVOC breakdown estimates							1.72									0	0	0	0	0	0	5.9276e+07	0	0	0	0	0	0	0	0	0	0	0	0	0	0	0.00375001
1-ethyl-4-methylcyclohexane	1-ethyl-4-methylcyclohexane		emissions to air	emissions to air, unspecified	08a91e70-3ddc-11dd-9160-0050c2490048	5.5656e+06	kg	EMEP	E-PRTR	Literature	Method A	NMVOC breakdown estimates																0	0	0	0	0	0	0	0	0	0	0	0	0	0	0	0	0	0	0	0	0	0
1-hexene	1-hexene		emissions to air	emissions to air, unspecified	08a91e70-3ddc-11dd-948a-0050c2490048	2.54246e+07	kg	EMEP	E-PRTR	Literature	Method A	NMVOC breakdown estimates							1.48						6.58972e-05			0	0	0	0	0	0	3.76284e+07	0	0	0	0	0	1675.41	0	0	0	0	0	0	0	0	0.00238051
1-pentene	1-pentene		emissions to air	emissions to air, unspecified	fe0acd60-3ddc-11dd-9fe2-0050c2490048	5.32658e+06	kg	EMEP	E-PRTR	Literature	Method A	NMVOC breakdown estimates							1.65									0	0	0	0	0	0	8.78885e+06	0	0	0	0	0	0	0	0	0	0	0	0	0	0	0.000556015
1-propanecarboxylic acid	Butanoic acid		emissions to air	emissions to air, unspecified	08a91e70-3ddc-11dd-966e-0050c2490048	3.76905e+06	kg	EMEP	E-PRTR	Literature	Method A	NMVOC breakdown estimates													5.76207			0	0	0	0	0	0	0	0	0	0	0	0	2.17175e+07	0	0	0	0	0	0	0	0	0
2-(3,5-dichlorophenyl)-2-(2,2,2-trichloroethly)oxirane	Tridiphane	Pesticides (surface water)	Emissions to water	Emissions to water, unspecified	ff526cc0-2140-4879-900c-0b7b0a8dc609	121.236	kg	FAOstat - Pesticide usage data	Eurostat - harvested areas	Eurostat - organic farming areas	Method F					0.000221157									9006.64			0	0	0	0.0268123	0	0	0	0	0	0	0	0	1.09193e+06	0	0	0	0	0	9.97122e-08	0	0	0
2-(3,5-dichlorophenyl)-2-(2,2,2-trichloroethly)oxirane	Tridiphane	Pesticides (air)	Emissions to air	Emissions to air, unspecified	a4b4aa92-cff4-49ee-b569-4025c92c89ca	1818.55	kg	FAOstat - Pesticide usage data	Eurostat - harvested areas	Literature	Method F					2.22805e-05									34.518			0	0	0	0.0405182	0	0	0	0	0	0	0	0	62772.7	0	0	0	0	0	1.50683e-07	0	0	0
2-(3,5-dichlorophenyl)-2-(2,2,2-trichloroethly)oxirane	Tridiphane	Pesticides (soil)	Emissions to soil	Emissions to soil, unspecified	365dabcf-66cb-4802-bc25-bce4d145aee0	7113.48	kg	FAOstat - Pesticide usage data	Eurostat - harvested areas	Eurostat - organic farming areas	Method F					8.06909e-06									115.339			0	0	0	0.0573994	0	0	0	0	0	0	0	0	820464	0	0	0	0	0	2.13462e-07	0	0	0
2-(benzothiazol-2-yloxy)-N-methyl-N-phenylacetamide	Mefenacet	Pesticides (surface water)	Emissions to water	Emissions to water, unspecified	4928e96c-6042-4eb4-9029-acd784e2ded4	1225.48	kg	Literature	Eurostat - harvested areas	Not applicable	Method F	Pesticides													32901.8			0	0	0	0	0	0	0	0	0	0	0	0	4.03205e+07	0	0	0	0	0	0	0	0	0
2-(benzothiazol-2-yloxy)-N-methyl-N-phenylacetamide	Mefenacet	Pesticides (air)	Emissions to air	Emissions to air, unspecified	c6bc81d6-84db-43fc-be0d-b32f12947568	18382.2	kg	FAOstat - Pesticide usage data	Eurostat - harvested areas	Literature	Method F	Pesticides													378.563			0	0	0	0	0	0	0	0	0	0	0	0	6.95882e+06	0	0	0	0	0	0	0	0	0
2-(benzothiazol-2-yloxy)-N-methyl-N-phenylacetamide	Mefenacet	Pesticides (soil)	Emissions to soil	Emissions to soil, unspecified	eeb289f0-d78d-4833-bf46-171c9408481c	90329.3	kg	FAOstat - Pesticide usage data	Eurostat - harvested areas	Literature	Method F	Pesticides													210.041			0	0	0	0	0	0	0	0	0	0	0	0	1.89729e+07	0	0	0	0	0	0	0	0	0
2,2,5-trimethylhexane	2,2,5-trimethylhexane		emissions to air	emissions to air, unspecified	08a91e70-3ddc-11dd-994f-0050c2490048	382842	kg	EMEP	E-PRTR	Literature	Method A	NMVOC breakdown estimates																0	0	0	0	0	0	0	0	0	0	0	0	0	0	0	0	0	0	0	0	0	0
2,2-dimethylbutane	2,2-dimethylbutane		emissions to air	emissions to air, unspecified	4d9a8790-3ddd-11dd-94c7-0050c2490048	8.01062e+06	kg	EMEP	E-PRTR	Literature	Method A	NMVOC breakdown estimates							0.407									0	0	0	0	0	0	3.26032e+06	0	0	0	0	0	0	0	0	0	0	0	0	0	0	0.00020626
2,3,4-trimethylpentane	3,3,4-trimethylhexane		emissions to air	emissions to air, unspecified	4d9a8790-3ddd-11dd-97cc-0050c2490048	96127.8	kg	EMEP	E-PRTR	Literature	Method A	NMVOC breakdown estimates																0	0	0	0	0	0	0	0	0	0	0	0	0	0	0	0	0	0	0	0	0	0
2,3,7,8-tetrachlorodibenzo-p-dioxin	dioxins	sludges	emissions to soil	emissions to soil, unspecified	fe0acd60-3ddc-11dd-ab66-0050c2490048	0.0932676	kg		Not applicable	Not applicable	Method E				0.209987										3306			0	0	0.019585	0	0	0	0	0	0	0	0	0	308.343	0	0	0	0	1.04298e-06	0	0	0	0
2,3,7,8-tetrachlorodibenzo-p-dioxin	PCDD + PCDF (dioxins + furans) (as Teq)		Emissions to air	Emissions to air, unspecified	fe0acd60-3ddc-11dd-ab67-0050c2490048	1.95518	kg	EMEP	E-PRTR	Literature	Method A				29.058										124676			0	0	56.8135	0	0	0	0	0	0	0	0	0	243763	0	0	0	0	0.00302556	0	0	0	0
2,3,7,8-tetrachlorodibenzo-p-dioxin	PCDD + PCDF (dioxins + furans) (as Teq)		Emissions to water	Emissions to water, unspecified	08a91e70-3ddc-11dd-92f7-0050c2490048	3.52302	kg	E-PRTR	EUROSTAT - economic data	Not applicable	Method D				99.9941										5.92431e+06			0	0	352.281	0	0	0	0	0	0	0	0	0	2.08714e+07	0	0	0	0	0.0187605	0	0	0	0
2,3-benzofuran	Benzofuran		emissions to air	emissions to air, unspecified	fe0acd60-3ddc-11dd-b0e9-0050c2490048	5.89872e+06	kg	EMEP	E-PRTR	Literature	Method A	NMVOC breakdown estimates			9.18038e-07										0.549207			0	0	5.41524	0	0	0	0	0	0	0	0	0	3.23962e+06	0	0	0	0	0.000288385	0	0	0	0
2,3-dihydro-2,2-dimethyl-[(dibutylamino)thio]methyl carbamic acid	Carbosulfan	Pesticides (surface water)	Emissions to water	Emissions to water, unspecified	08a91e70-3ddc-11dd-a01c-0050c2490048	425.418	kg	FAOstat - Pesticide usage data	Eurostat - harvested areas	Eurostat - organic farming areas	Method F					0.000856158									109114			0	0	0	0.364225	0	0	0	0	0	0	0	0	4.64192e+07	0	0	0	0	0	1.35451e-06	0	0	0
2,3-dihydro-2,2-dimethyl-[(dibutylamino)thio]methyl carbamic acid	Carbosulfan	Pesticides (air)	Emissions to air	Emissions to air, unspecified	08a91e70-3ddc-11dd-a03c-0050c2490048	6381.26	kg	FAOstat - Pesticide usage data	Eurostat - harvested areas	Literature	Method F					1.2149e-05									911.59			0	0	0	0.0775258	0	0	0	0	0	0	0	0	5.8171e+06	0	0	0	0	0	2.8831e-07	0	0	0
2,3-dihydro-2,2-dimethyl-[(dibutylamino)thio]methyl carbamic acid	Carbosulfan	Pesticides (soil)	Emissions to soil	Emissions to soil, unspecified	08a91e70-3ddc-11dd-a03b-0050c2490048	8508.35	kg	FAOstat - Pesticide usage data	Eurostat - harvested areas	Eurostat - organic farming areas	Method F					1.51222e-06									191.478			0	0	0	0.0128665	0	0	0	0	0	0	0	0	1.62917e+06	0	0	0	0	0	4.7849e-08	0	0	0
2,3-dimethylbutane	2,3-dimethylbutane		emissions to air	emissions to air, unspecified	4d9a8790-3ddd-11dd-94cb-0050c2490048	1.73666e+07	kg	EMEP	E-PRTR	Literature	Method A	NMVOC breakdown estimates							0.914									0	0	0	0	0	0	1.58731e+07	0	0	0	0	0	0	0	0	0	0	0	0	0	0	0.00100419
2,3-dimethylpentane	2,3-dimethylpentane		emissions to air	emissions to air, unspecified	08a91e70-3ddc-11dd-9953-0050c2490048	2.1258e+06	kg	EMEP	E-PRTR	Literature	Method A	NMVOC breakdown estimates																0	0	0	0	0	0	0	0	0	0	0	0	0	0	0	0	0	0	0	0	0	0
2,4'-dichloro-α(pyrimidin-5-yl)benzhydryl alcohol	Fenarimol	Pesticides (surface water)	Emissions to water	Emissions to water, unspecified	6b440341-62c2-47a9-a8bb-56d93ffb1f77	369.525	kg	FAOstat - Pesticide usage data	Eurostat - harvested areas	Eurostat - organic farming areas	Method F					4.68087e-05									34711			0	0	0	0.017297	0	0	0	0	0	0	0	0	1.28266e+07	0	0	0	0	0	6.43257e-08	0	0	0
2,4'-dichloro-α(pyrimidin-5-yl)benzhydryl alcohol	Fenarimol	Pesticides (air)	Emissions to air	Emissions to air, unspecified	0571cf6b-e03b-4ff4-91b8-010168dcb862	5542.87	kg	FAOstat - Pesticide usage data	Eurostat - harvested areas	Literature	Method F					1.00343e-05									1975.34			0	0	0	0.0556187	0	0	0	0	0	0	0	0	1.09491e+07	0	0	0	0	0	2.0684e-07	0	0	0
2,4'-dichloro-α(pyrimidin-5-yl)benzhydryl alcohol	Fenarimol	Pesticides (soil)	Emissions to soil	Emissions to soil, unspecified	c7319e61-4ba9-47e4-b37f-c1cdb413485b	7390.49	kg	FAOstat - Pesticide usage data	Eurostat - harvested areas	Eurostat - organic farming areas	Method F					2.2313e-06									1648.52			0	0	0	0.0164904	0	0	0	0	0	0	0	0	1.21834e+07	0	0	0	0	0	6.1326e-08	0	0	0
2,4-dimethylheptane	2,4-dimethylheptane		emissions to air	emissions to air, unspecified	4d9a8790-3ddd-11dd-9d78-0050c2490048	768794	kg	EMEP	E-PRTR	Literature	Method A	NMVOC breakdown estimates																0	0	0	0	0	0	0	0	0	0	0	0	0	0	0	0	0	0	0	0	0	0
2,4-dimethylpentane	2,4-dimethylpentane		emissions to air	emissions to air, unspecified	fe0acd60-3ddc-11dd-a719-0050c2490048	4.15166e+07	kg	EMEP	E-PRTR	Literature	Method A	NMVOC breakdown estimates																0	0	0	0	0	0	0	0	0	0	0	0	0	0	0	0	0	0	0	0	0	0
2,5-dimethylfuran	Dimethylfuran		emissions to air	emissions to air, unspecified	4c57ae9a-f1dc-4219-a96d-d7501f4b6f7a	1.35676e+07	kg	EMEP	E-PRTR	Literature	Method A	NMVOC breakdown estimates													0.00137858			0	0	0	0	0	0	0	0	0	0	0	0	18704	0	0	0	0	0	0	0	0	0
2,5-dimethylhexane	2,5-dimethylhexane		emissions to air	emissions to air, unspecified	08a91e70-3ddc-11dd-918b-0050c2490048	96127.8	kg	EMEP	E-PRTR	Literature	Method A	NMVOC breakdown estimates																0	0	0	0	0	0	0	0	0	0	0	0	0	0	0	0	0	0	0	0	0	0
2,6-dichloro-4-nitroaniline	Dicloran	Pesticides (surface water)	Emissions to water	Emissions to water, unspecified	cfd74337-c92a-4672-9b0f-1a1c77a7548d	2568.05	kg	FAOstat - Pesticide usage data	Eurostat - harvested areas	Eurostat - organic farming areas	Method F					3.92354e-06									16555.4			0	0	0	0.0100759	0	0	0	0	0	0	0	0	4.25153e+07	0	0	0	0	0	3.7471e-08	0	0	0
2,6-dichloro-4-nitroaniline	Dicloran	Pesticides (air)	Emissions to air	Emissions to air, unspecified	9e6efd70-6e3d-4a12-b4fe-0dc006501730	38520.8	kg	FAOstat - Pesticide usage data	Eurostat - harvested areas	Literature	Method F					2.20169e-06									1012.15			0	0	0	0.0848108	0	0	0	0	0	0	0	0	3.89887e+07	0	0	0	0	0	3.15403e-07	0	0	0
2,6-dichloro-4-nitroaniline	Dicloran	Pesticides (soil)	Emissions to soil	Emissions to soil, unspecified	3e1d5de3-6ef3-435b-8199-7a8c6a7fb886	51361.1	kg	FAOstat - Pesticide usage data	Eurostat - harvested areas	Eurostat - organic farming areas	Method F					1.26839e-07									497.581			0	0	0	0.0065146	0	0	0	0	0	0	0	0	2.55563e+07	0	0	0	0	0	2.42271e-08	0	0	0
2-amino-3-chloro-1,4-naphthoquinone	Quinoclamine	Pesticides (surface water)	Emissions to water	Emissions to water, unspecified	402ef278-2c43-454b-9a02-bebae8469517	121.236	kg	FAOstat - Pesticide usage data	Eurostat - harvested areas	Eurostat - organic farming areas	Method F														40902.7			0	0	0	0	0	0	0	0	0	0	0	0	4.9589e+06	0	0	0	0	0	0	0	0	0
2-amino-3-chloro-1,4-naphthoquinone	Quinoclamine	Pesticides (air)	Emissions to air	Emissions to air, unspecified	2cc7f514-ed89-4f66-a60f-c75d6f6e099e	1818.55	kg	FAOstat - Pesticide usage data	Eurostat - harvested areas	Literature	Method F														952.433			0	0	0	0	0	0	0	0	0	0	0	0	1.73204e+06	0	0	0	0	0	0	0	0	0
2-amino-3-chloro-1,4-naphthoquinone	Quinoclamine	Pesticides (soil)	Emissions to soil	Emissions to soil, unspecified	d2cb06f3-f09a-44a2-96c3-b8cf007b9c06	7113.48	kg	FAOstat - Pesticide usage data	Eurostat - harvested areas	Eurostat - organic farming areas	Method F														1012.16			0	0	0	0	0	0	0	0	0	0	0	0	7.19997e+06	0	0	0	0	0	0	0	0	0
2-butanol	sec.-butanol		emissions to air	emissions to air, unspecified	08a91e70-3ddc-11dd-91b4-0050c2490048	2227.3	kg	EMEP	E-PRTR	Literature	Method A	NMVOC breakdown estimates							0.676						0.131448			0	0	0	0	0	0	1505.65	0	0	0	0	0	292.774	0	0	0	0	0	0	0	0	9.52531e-08
2-butene-cis	cis-2-butene		emissions to air	emissions to air, unspecified	fe0acd60-3ddc-11dd-a574-0050c2490048	2.26609e+06	kg	EMEP	E-PRTR	Literature	Method A	NMVOC breakdown estimates							1.94									0	0	0	0	0	0	4.39621e+06	0	0	0	0	0	0	0	0	0	0	0	0	0	0	0.00027812
2-chlorobuta-1,3-diene	2-chlorobuta-1,3-diene		emissions to water	emissions to water, unspecified	f514e49d-b89d-401b-9999-14f807255562	0	kg	Not applicable	Not applicable	Not applicable	Not applicable				2.76606e-06										11.614			0	0	0	0	0	0	0	0	0	0	0	0	0	0	0	0	0	0	0	0	0	0
2-chlorobuta-1,3-diene	2-chlorobuta-1,3-diene		emissions to soil	emissions to soil, unspecified	eb041449-3fe6-4847-8468-b74743d8a836	0	kg	Not applicable	Not applicable	Not applicable	Not applicable				2.16787e-07										0.102961			0	0	0	0	0	0	0	0	0	0	0	0	0	0	0	0	0	0	0	0	0	0
2-chloro-N-(2,6-dimethylphenyl)-N-(2-methoxyethyl)acetamide	Dimethachlor	Pesticides (surface water)	Emissions to water	Emissions to water, unspecified	2748994c-7f70-4699-83ee-ce2e76e3b9b7	2932	kg	Literature	Eurostat - harvested areas	Not applicable	Method F	Pesticides													12476.3			0	0	0	0	0	0	0	0	0	0	0	0	3.65805e+07	0	0	0	0	0	0	0	0	0
2-chloro-N-(2,6-dimethylphenyl)-N-(2-methoxyethyl)acetamide	Dimethachlor	Pesticides (air)	Emissions to air	Emissions to air, unspecified	88aa004f-2eb1-485c-985e-cff6e4bb5d21	43980.1	kg	FAOstat - Pesticide usage data	Eurostat - harvested areas	Literature	Method F	Pesticides													439.164			0	0	0	0	0	0	0	0	0	0	0	0	1.93145e+07	0	0	0	0	0	0	0	0	0
2-chloro-N-(2,6-dimethylphenyl)-N-(2-methoxyethyl)acetamide	Dimethachlor	Pesticides (soil)	Emissions to soil	Emissions to soil, unspecified	c7bf6c3a-2a30-4792-80c2-2f4c043d5c7b	216968	kg	FAOstat - Pesticide usage data	Eurostat - harvested areas	Literature	Method F	Pesticides													1747.28			0	0	0	0	0	0	0	0	0	0	0	0	3.79103e+08	0	0	0	0	0	0	0	0	0
2-chloro-N-[[[4-(trifluoromethoxy)phenyl]amino]carbonyl]benzamide	Triflumuron	Pesticides (surface water)	Emissions to water	Emissions to water, unspecified	e5e6ed42-a3c1-436b-8277-a3a0abb6569a	80.8764	kg	Literature	Eurostat - harvested areas	Not applicable	Method F	Pesticides													8.86171e+06			0	0	0	0	0	0	0	0	0	0	0	0	7.16703e+08	0	0	0	0	0	0	0	0	0
2-chloro-N-[[[4-(trifluoromethoxy)phenyl]amino]carbonyl]benzamide	Triflumuron	Pesticides (air)	Emissions to air	Emissions to air, unspecified	e562a677-9995-4dd5-9194-b77db93a48fb	1213.15	kg	FAOstat - Pesticide usage data	Eurostat - harvested areas	Literature	Method F	Pesticides													357064			0	0	0	0	0	0	0	0	0	0	0	0	4.33171e+08	0	0	0	0	0	0	0	0	0
2-chloro-N-[[[4-(trifluoromethoxy)phenyl]amino]carbonyl]benzamide	Triflumuron	Pesticides (soil)	Emissions to soil	Emissions to soil, unspecified	97261fd8-1f27-4569-805e-7e92a0f11b25	1617.53	kg	FAOstat - Pesticide usage data	Eurostat - harvested areas	Literature	Method F	Pesticides													1.31168e+06			0	0	0	0	0	0	0	0	0	0	0	0	2.12167e+09	0	0	0	0	0	0	0	0	0
2-chlorophenol	2-chlorophenol		emissions to air	emissions to air, unspecified	08a91e70-3ddc-11dd-9778-0050c2490048	1.04471e+07	kg	EMEP	E-PRTR	Literature	Method A	NMVOC breakdown estimates				7.29748e-07									12.8938			0	0	0	7.62376	0	0	0	0	0	0	0	0	1.34703e+08	0	0	0	0	0	2.8352e-05	0	0	0
2-hexanone	hexanone		emissions to air	emissions to air, unspecified	08a91e70-3ddc-11dd-9486-0050c2490048	4461.82	kg	EMEP	E-PRTR	Literature	Method A	NMVOC breakdown estimates							0.966						0.0730695			0	0	0	0	0	0	4310.12	0	0	0	0	0	326.023	0	0	0	0	0	0	0	0	2.72674e-07
2-methyl-1-butene	2-methy-1-butene		emissions to air	emissions to air, unspecified	fe0acd60-3ddc-11dd-a308-0050c2490048	1.04985e+06	kg	EMEP	E-PRTR	Literature	Method A	NMVOC breakdown estimates							1.3									0	0	0	0	0	0	1.3648e+06	0	0	0	0	0	0	0	0	0	0	0	0	0	0	8.63422e-05
2-methyl-1-propene	2-methyl-1-propene		emissions to air	emissions to air, unspecified	fe0acd60-3ddc-11dd-ab44-0050c2490048	0	kg	Not applicable	Not applicable	Not applicable	Not applicable				3.43747e-09				1.06									0	0	0	0	0	0	0	0	0	0	0	0	0	0	0	0	0	0	0	0	0	0
2-methyl-1-propene	2-methyl-1-propene		emissions to water	emissions to water, unspecified	f2154a62-6555-11dd-ad8b-0800200c9a66	0	kg	Not applicable	Not applicable	Not applicable	Not applicable				2.92607e-09													0	0	0	0	0	0	0	0	0	0	0	0	0	0	0	0	0	0	0	0	0	0
2-methyl-1-propene	2-methyl-1-propene		emissions to soil	emissions to soil, unspecified	f2154a61-6555-11dd-ad8b-0800200c9a66	0	kg	Not applicable	Not applicable	Not applicable	Not applicable				1.2722e-10													0	0	0	0	0	0	0	0	0	0	0	0	0	0	0	0	0	0	0	0	0	0
2-methyl-2-butene	2-methyl-2-butene		emissions to air	emissions to air, unspecified	fe0acd60-3ddc-11dd-a30c-0050c2490048	2.05338e+06	kg	EMEP	E-PRTR	Literature	Method A	NMVOC breakdown estimates							1.42									0	0	0	0	0	0	2.91579e+06	0	0	0	0	0	0	0	0	0	0	0	0	0	0	0.000184464
2-methyl-3-furanilide	Fenfuram	Pesticides (surface water)	Emissions to water	Emissions to water, unspecified	fc9e4f75-f1b9-4245-9454-b94e0d9a722e	156.848	kg	Literature	Eurostat - harvested areas	Not applicable	Method F	Pesticides													3543.72			0	0	0	0	0	0	0	0	0	0	0	0	555827	0	0	0	0	0	0	0	0	0
2-methyl-3-furanilide	Fenfuram	Pesticides (air)	Emissions to air	Emissions to air, unspecified	d8fa04e9-3a11-416d-b3b8-273c458c9364	2352.72	kg	FAOstat - Pesticide usage data	Eurostat - harvested areas	Literature	Method F	Pesticides													68.5806			0	0	0	0	0	0	0	0	0	0	0	0	161351	0	0	0	0	0	0	0	0	0
2-methyl-3-furanilide	Fenfuram	Pesticides (soil)	Emissions to soil	Emissions to soil, unspecified	5151610a-c1e1-4792-be63-ad5905f825bc	3136.97	kg	FAOstat - Pesticide usage data	Eurostat - harvested areas	Literature	Method F	Pesticides													202.536			0	0	0	0	0	0	0	0	0	0	0	0	635350	0	0	0	0	0	0	0	0	0
2-methyl-4,6-dinitrophenol	DNOC	Pesticides (surface water)	Emissions to water	Emissions to water, unspecified	fe0acd60-3ddc-11dd-a81f-0050c2490048	776.893	kg	FAOstat - Pesticide usage data	Eurostat - harvested areas	Eurostat - organic farming areas	Method F														32935.5			0	0	0	0	0	0	0	0	0	0	0	0	2.55874e+07	0	0	0	0	0	0	0	0	0
2-methyl-4,6-dinitrophenol	DNOC	Pesticides (air)	Emissions to air	Emissions to air, unspecified	4d9a8790-3ddd-11dd-8ed9-0050c2490048	11653.4	kg	FAOstat - Pesticide usage data	Eurostat - harvested areas	Literature	Method F														2371.84			0	0	0	0	0	0	0	0	0	0	0	0	2.76399e+07	0	0	0	0	0	0	0	0	0
2-methyl-4,6-dinitrophenol	DNOC	Pesticides (soil)	Emissions to soil	Emissions to soil, unspecified	4d9a8790-3ddd-11dd-8ed8-0050c2490048	15537.9	kg	FAOstat - Pesticide usage data	Eurostat - harvested areas	Eurostat - organic farming areas	Method F														2172.99			0	0	0	0	0	0	0	0	0	0	0	0	3.37637e+07	0	0	0	0	0	0	0	0	0
2-methylheptane	2-methylheptane		emissions to air	emissions to air, unspecified	4d9a8790-3ddd-11dd-91ec-0050c2490048	1.31221e+07	kg	EMEP	E-PRTR	Literature	Method A	NMVOC breakdown estimates																0	0	0	0	0	0	0	0	0	0	0	0	0	0	0	0	0	0	0	0	0	0
2-methylhexane	2-methylhexane		emissions to air	emissions to air, unspecified	fe0acd60-3ddc-11dd-a699-0050c2490048	6.45693e+06	kg	EMEP	E-PRTR	Literature	Method A	NMVOC breakdown estimates							0.694									0	0	0	0	0	0	4.48111e+06	0	0	0	0	0	0	0	0	0	0	0	0	0	0	0.000283491
2-methylnonane	2-methylnonane		emissions to air	emissions to air, unspecified	4d9a8790-3ddd-11dd-91f0-0050c2490048	1.95766e+07	kg	EMEP	E-PRTR	Literature	Method A	NMVOC breakdown estimates																0	0	0	0	0	0	0	0	0	0	0	0	0	0	0	0	0	0	0	0	0	0
2-methyloctane	2-methyloctane		emissions to air	emissions to air, unspecified	4d9a8790-3ddd-11dd-8ec6-0050c2490048	6.71635e+06	kg	EMEP	E-PRTR	Literature	Method A	NMVOC breakdown estimates																0	0	0	0	0	0	0	0	0	0	0	0	0	0	0	0	0	0	0	0	0	0
2-methylpentane	2-methylpentane		emissions to air	emissions to air, unspecified	4d9a8790-3ddd-11dd-907b-0050c2490048	1.7608e+07	kg	EMEP	E-PRTR	Literature	Method A	NMVOC breakdown estimates							0.709									0	0	0	0	0	0	1.24841e+07	0	0	0	0	0	0	0	0	0	0	0	0	0	0	0.000789787
2-methylpropanoic acid	2-Methyl propanoic acid		emissions to air	emissions to air, unspecified	4d9a8790-3ddd-11dd-8eca-0050c2490048	384725	kg	EMEP	E-PRTR	Literature	Method A	NMVOC breakdown estimates													3.96883			0	0	0	0	0	0	0	0	0	0	0	0	1.52691e+06	0	0	0	0	0	0	0	0	0
2-pentene	2-pentene		emissions to air	emissions to air, unspecified	fe0acd60-3ddc-11dd-a5c1-0050c2490048	3.67446e+06	kg	EMEP	E-PRTR	Literature	Method A	NMVOC breakdown estimates																0	0	0	0	0	0	0	0	0	0	0	0	0	0	0	0	0	0	0	0	0	0
3,3-dimethyl-1-(methylthio)butanone-O-(N-methylcarbamoyl)oxime	Thiofanox	Pesticides (surface water)	Emissions to water	Emissions to water, unspecified	12c29a44-a043-4611-9cd4-309489b58226	739.873	kg	Literature	Eurostat - harvested areas	Not applicable	Method F	Pesticides													188974			0	0	0	0	0	0	0	0	0	0	0	0	1.39817e+08	0	0	0	0	0	0	0	0	0
3,3-dimethyl-1-(methylthio)butanone-O-(N-methylcarbamoyl)oxime	Thiofanox	Pesticides (air)	Emissions to air	Emissions to air, unspecified	97b24aa1-e82e-4e0c-b099-25baf4db06ac	11098.1	kg	FAOstat - Pesticide usage data	Eurostat - harvested areas	Literature	Method F	Pesticides													12815			0	0	0	0	0	0	0	0	0	0	0	0	1.42222e+08	0	0	0	0	0	0	0	0	0
3,3-dimethyl-1-(methylthio)butanone-O-(N-methylcarbamoyl)oxime	Thiofanox	Pesticides (soil)	Emissions to soil	Emissions to soil, unspecified	04054826-2cee-43c0-a2bf-80d3f5db04f1	14797.5	kg	FAOstat - Pesticide usage data	Eurostat - harvested areas	Literature	Method F	Pesticides													31316.2			0	0	0	0	0	0	0	0	0	0	0	0	4.634e+08	0	0	0	0	0	0	0	0	0
3,5-dimethylethylbenzene	1-ethyl-2,3-dimethylbenzene		emissions to air	Emissions to air, unspecified	4d9a8790-3ddd-11dd-8dd6-0050c2490048	1.7495e+06	kg	EMEP	E-PRTR	Literature	Method A	NMVOC breakdown estimates																0	0	0	0	0	0	0	0	0	0	0	0	0	0	0	0	0	0	0	0	0	0
3-chloro-4-(chloromethyl)-1-[3-(trifluoromethyl)phenyl]pyrrolidin-2-one	Flurochloridone	Pesticides (surface water)	Emissions to water	Emissions to water, unspecified	302ed051-2087-4c82-b841-7301067790d3	121.236	kg	FAOstat - Pesticide usage data	Eurostat - harvested areas	Eurostat - organic farming areas	Method F														20143.9			0	0	0	0	0	0	0	0	0	0	0	0	2.44218e+06	0	0	0	0	0	0	0	0	0
3-chloro-4-(chloromethyl)-1-[3-(trifluoromethyl)phenyl]pyrrolidin-2-one	Flurochloridone	Pesticides (air)	Emissions to air	Emissions to air, unspecified	ee22fe70-a8d3-4308-bb03-9b6e03073ca7	1818.55	kg	FAOstat - Pesticide usage data	Eurostat - harvested areas	Literature	Method F														799.95			0	0	0	0	0	0	0	0	0	0	0	0	1.45475e+06	0	0	0	0	0	0	0	0	0
3-chloro-4-(chloromethyl)-1-[3-(trifluoromethyl)phenyl]pyrrolidin-2-one	Flurochloridone	Pesticides (soil)	Emissions to soil	Emissions to soil, unspecified	111593ed-e056-47da-a31d-2f3b969f879a	7113.48	kg	FAOstat - Pesticide usage data	Eurostat - harvested areas	Eurostat - organic farming areas	Method F														652.966			0	0	0	0	0	0	0	0	0	0	0	0	4.64486e+06	0	0	0	0	0	0	0	0	0
3-methylbutanoic acid	3-Methyl butanoic acid		emissions to air	emissions to air, unspecified	fe0acd60-3ddc-11dd-ae69-0050c2490048	941122	kg	EMEP	E-PRTR	Literature	Method A	NMVOC breakdown estimates													0.417605			0	0	0	0	0	0	0	0	0	0	0	0	393017	0	0	0	0	0	0	0	0	0
3-methylheptane	3-methylheptane		emissions to air	emissions to air, unspecified	4d9a8790-3ddd-11dd-96c5-0050c2490048	3.99785e+06	kg	EMEP	E-PRTR	Literature	Method A	NMVOC breakdown estimates																0	0	0	0	0	0	0	0	0	0	0	0	0	0	0	0	0	0	0	0	0	0
3-methylhexane	3-methylhexane		emissions to air	emissions to air, unspecified	fe0acd60-3ddc-11dd-aee2-0050c2490048	7.64949e+06	kg	EMEP	E-PRTR	Literature	Method A	NMVOC breakdown estimates							0.615									0	0	0	0	0	0	4.70444e+06	0	0	0	0	0	0	0	0	0	0	0	0	0	0	0.00029762
3-methylpentane	3-methylpentane		emissions to air	emissions to air, unspecified	08a91e70-3ddc-11dd-a021-0050c2490048	1.01222e+07	kg	EMEP	E-PRTR	Literature	Method A	NMVOC breakdown estimates							0.809									0	0	0	0	0	0	8.18889e+06	0	0	0	0	0	0	0	0	0	0	0	0	0	0	0.000518059
4-(2,4-dichlorophenoxy)butanoic acid	2,4-DB	Pesticides (surface water)	Emissions to water	Emissions to water, unspecified	08a91e70-3ddc-11dd-a019-0050c2490048	3601.79	kg	Literature	Eurostat - harvested areas	Not applicable	Method F	Pesticides				9.24706e-07									1331.73			0	0	0	0.0033306	0	0	0	0	0	0	0	0	4.79661e+06	0	0	0	0	0	1.23861e-08	0	0	0
4-(2,4-dichlorophenoxy)butanoic acid	2,4-DB	Pesticides (air)	Emissions to air	Emissions to air, unspecified	4d9a8790-3ddd-11dd-903e-0050c2490048	54026.8	kg	FAOstat - Pesticide usage data	Eurostat - harvested areas	Literature	Method F	Pesticides				5.17064e-07									44.4286			0	0	0	0.0279353	0	0	0	0	0	0	0	0	2.40034e+06	0	0	0	0	0	1.03889e-07	0	0	0
4-(2,4-dichlorophenoxy)butanoic acid	2,4-DB	Pesticides (soil)	Emissions to soil	Emissions to soil, unspecified	4d9a8790-3ddd-11dd-903d-0050c2490048	255803	kg	FAOstat - Pesticide usage data	Eurostat - harvested areas	Literature	Method F	Pesticides				1.54647e-07									167.35			0	0	0	0.0395592	0	0	0	0	0	0	0	0	4.28088e+07	0	0	0	0	0	1.47117e-07	0	0	0
4-CPA	4-CPA	Pesticides (surface water)	Emissions to water	Emissions to water, unspecified	448c380b-a618-4bac-a7b3-dbda86cf54da	30.65	kg	FAOstat - Pesticide usage data	Eurostat - harvested areas	Eurostat - organic farming areas	Method F														125.105			0	0	0	0	0	0	0	0	0	0	0	0	3834.48	0	0	0	0	0	0	0	0	0
4-CPA	4-CPA	Pesticides (air)	Emissions to air	Emissions to air, unspecified	5a94f889-2e6e-4cc5-959d-46632406eccb	459.75	kg	FAOstat - Pesticide usage data	Eurostat - harvested areas	Literature	Method F														11.4655			0	0	0	0	0	0	0	0	0	0	0	0	5271.26	0	0	0	0	0	0	0	0	0
4-CPA	4-CPA	Pesticides (soil)	Emissions to soil	Emissions to soil, unspecified	914e2e5c-537f-497f-81fc-eacd7df95da3	613	kg	FAOstat - Pesticide usage data	Eurostat - harvested areas	Eurostat - organic farming areas	Method F														23.8021			0	0	0	0	0	0	0	0	0	0	0	0	14590.7	0	0	0	0	0	0	0	0	0
4-ethylphenol	4-ethyl phenol		emissions to air	emissions to air, unspecified	429cd4c9-98f7-4f06-a6b0-85580e9b2599	213053	kg	EMEP	E-PRTR	Literature	Method A	NMVOC breakdown estimates													8.90979			0	0	0	0	0	0	0	0	0	0	0	0	1.89826e+06	0	0	0	0	0	0	0	0	0
4-ethyltoluene	4-ethyltoluene		emissions to air	emissions to air, unspecified	08a91e70-3ddc-11dd-99c5-0050c2490048	1.48987e+07	kg	EMEP	E-PRTR	Literature	Method A	NMVOC breakdown estimates							1.53									0	0	0	0	0	0	2.27951e+07	0	0	0	0	0	0	0	0	0	0	0	0	0	0	0.0014421
4-hydroxy-4-methylpentan-2-one	diacetonalcohol		emissions to air	emissions to air, unspecified	fe0acd60-3ddc-11dd-9fde-0050c2490048	5.86989e+06	kg	EMEP	E-PRTR	Literature	Method A	NMVOC breakdown estimates							0.519						3.39801			0	0	0	0	0	0	3.04647e+06	0	0	0	0	0	1.99459e+07	0	0	0	0	0	0	0	0	0.000192731
4-methylheptane	4-methylheptane		emissions to air	emissions to air, unspecified	08a91e70-3ddc-11dd-9191-0050c2490048	1.33679e+06	kg	EMEP	E-PRTR	Literature	Method A	NMVOC breakdown estimates																0	0	0	0	0	0	0	0	0	0	0	0	0	0	0	0	0	0	0	0	0	0
4-propylheptane	4-propylheptane		emissions to air	emissions to air, unspecified	fe0acd60-3ddc-11dd-a41d-0050c2490048	286943	kg	EMEP	E-PRTR	Literature	Method A	NMVOC breakdown estimates																0	0	0	0	0	0	0	0	0	0	0	0	0	0	0	0	0	0	0	0	0	0
4-tert-butyltoluene	1-methyl-4-tert-butylbenzene		emissions to air	emissions to air, unspecified	87f5928a-7563-45a7-a7c0-3f2549952302	413531	kg	EMEP	E-PRTR	Literature	Method A	NMVOC breakdown estimates													0.024085			0	0	0	0	0	0	0	0	0	0	0	0	9959.88	0	0	0	0	0	0	0	0	0
5-(2-chloro-4'-fluorobenzhydryl)-4-hydroxypyrimidine	Nuarimol	Pesticides (surface water)	Emissions to water	Emissions to water, unspecified	ecfc318f-6a09-40cc-870d-c126ec2a3c31	369.525	kg	FAOstat - Pesticide usage data	Eurostat - harvested areas	Eurostat - organic farming areas	Method F														13261.6			0	0	0	0	0	0	0	0	0	0	0	0	4.90049e+06	0	0	0	0	0	0	0	0	0
5-(2-chloro-4'-fluorobenzhydryl)-4-hydroxypyrimidine	Nuarimol	Pesticides (air)	Emissions to air	Emissions to air, unspecified	77c124f7-4f24-4a89-9030-e01550a0a764	5542.87	kg	FAOstat - Pesticide usage data	Eurostat - harvested areas	Literature	Method F														429.321			0	0	0	0	0	0	0	0	0	0	0	0	2.37967e+06	0	0	0	0	0	0	0	0	0
5-(2-chloro-4'-fluorobenzhydryl)-4-hydroxypyrimidine	Nuarimol	Pesticides (soil)	Emissions to soil	Emissions to soil, unspecified	1b1c4e69-9fe8-4f75-8bb0-d7b15b7ef828	7390.49	kg	FAOstat - Pesticide usage data	Eurostat - harvested areas	Eurostat - organic farming areas	Method F														80.9083			0	0	0	0	0	0	0	0	0	0	0	0	597952	0	0	0	0	0	0	0	0	0
5-[2-chloro-4-(trifluoromethyl)phenoxy]-N-(methylsulphonyl)-2-nitrobenzamide	Fomesafen	Pesticides (surface water)	Emissions to water	Emissions to water, unspecified	f7c679a5-3f76-42d1-bbfd-37aab1f26384	807.086	kg	FAOstat - Pesticide usage data	Eurostat - harvested areas	Eurostat - organic farming areas	Method F				2.06359e-05										391.022			0	0	0.016655	0	0	0	0	0	0	0	0	0	315588	0	0	0	0	8.86947e-07	0	0	0	0
5-[2-chloro-4-(trifluoromethyl)phenoxy]-N-(methylsulphonyl)-2-nitrobenzamide	Fomesafen	Pesticides (air)	Emissions to air	Emissions to air, unspecified	19828f06-534b-4eac-8944-d5cc6bea8da1	12106.3	kg	FAOstat - Pesticide usage data	Eurostat - harvested areas	Literature	Method F				9.03858e-06										27.8424			0	0	0.109424	0	0	0	0	0	0	0	0	0	337068	0	0	0	0	5.82727e-06	0	0	0	0
5-[2-chloro-4-(trifluoromethyl)phenoxy]-N-(methylsulphonyl)-2-nitrobenzamide	Fomesafen	Pesticides (soil)	Emissions to soil	Emissions to soil, unspecified	676d982b-e5c8-41c1-a554-b743a1fdeb7f	59667.6	kg	FAOstat - Pesticide usage data	Eurostat - harvested areas	Eurostat - organic farming areas	Method F				1.15366e-06										21.6135			0	0	0.068836	0	0	0	0	0	0	0	0	0	1.28963e+06	0	0	0	0	3.66581e-06	0	0	0	0
5-butyl-2-ethylamino-6-methylpyrimidin-4-yldimethylsulphamate	Bupirimate	Pesticides (surface water)	Emissions to water	Emissions to water, unspecified	b8369410-9691-4484-a920-ef216688c1db	369.525	kg	FAOstat - Pesticide usage data	Eurostat - harvested areas	Eurostat - organic farming areas	Method F														16881.6			0	0	0	0	0	0	0	0	0	0	0	0	6.23816e+06	0	0	0	0	0	0	0	0	0
5-butyl-2-ethylamino-6-methylpyrimidin-4-yldimethylsulphamate	Bupirimate	Pesticides (air)	Emissions to air	Emissions to air, unspecified	9b4b4a93-e34c-4ecc-a2e8-4c9fb7041e93	5542.87	kg	FAOstat - Pesticide usage data	Eurostat - harvested areas	Literature	Method F														199.044			0	0	0	0	0	0	0	0	0	0	0	0	1.10327e+06	0	0	0	0	0	0	0	0	0
5-butyl-2-ethylamino-6-methylpyrimidin-4-yldimethylsulphamate	Bupirimate	Pesticides (soil)	Emissions to soil	Emissions to soil, unspecified	5ca52aa5-66b4-4795-a43e-9e32f72ca1e0	7390.49	kg	FAOstat - Pesticide usage data	Eurostat - harvested areas	Eurostat - organic farming areas	Method F														667.451			0	0	0	0	0	0	0	0	0	0	0	0	4.93279e+06	0	0	0	0	0	0	0	0	0
acenaphthene	acenaphthene		emissions to water	emissions to water, unspecified	08a91e70-3ddc-11dd-9197-0050c2490048	0	kg	Not applicable	Not applicable	Not applicable	Not applicable					2.58347e-07									4115.81			0	0	0	0	0	0	0	0	0	0	0	0	0	0	0	0	0	0	0	0	0	0
acenaphthene	acenaphthene		emissions to soil	emissions to soil, unspecified	fe0acd60-3ddc-11dd-acff-0050c2490048	0	kg	Not applicable	Not applicable	Not applicable	Not applicable					1.45132e-09									18.2819			0	0	0	0	0	0	0	0	0	0	0	0	0	0	0	0	0	0	0	0	0	0
acephate	Acephate	Pesticides (surface water)	Emissions to water	Emissions to water, unspecified	4d9a8790-3ddd-11dd-97d6-0050c2490048	578.864	kg	Literature	Eurostat - harvested areas	Not applicable	Method F	Pesticides			2.48703e-07	0.000692959									627.196			0	0	0.000143965	0.401129	0	0	0	0	0	0	0	0	363061	0	0	0	0	7.66675e-09	1.49176e-06	0	0	0
acephate	Acephate	Pesticides (air)	Emissions to air	Emissions to air, unspecified	4d9a8790-3ddd-11dd-97d0-0050c2490048	8682.96	kg	FAOstat - Pesticide usage data	Eurostat - harvested areas	Literature	Method F	Pesticides			1.62508e-07	0.000452795									106.187			0	0	0.00141105	3.9316	0	0	0	0	0	0	0	0	922018	0	0	0	0	7.51445e-08	1.46212e-05	0	0	0
acephate	Acephate	Pesticides (soil)	Emissions to soil	Emissions to soil, unspecified	08a91e70-3ddc-11dd-919e-0050c2490048	11577.3	kg	FAOstat - Pesticide usage data	Eurostat - harvested areas	Literature	Method F	Pesticides			1.00064e-07	0.000278807									252.348			0	0	0.00115847	3.22783	0	0	0	0	0	0	0	0	2.9215e+06	0	0	0	0	6.16933e-08	1.2004e-05	0	0	0
acetaldehyde	acetaldehyde		emissions to water	emissions to water, unspecified	fe0acd60-3ddc-11dd-a7ab-0050c2490048	0	kg	Not applicable	Not applicable	Not applicable	Not applicable				8.82612e-08	4.53002e-07									47.1725			0	0	0	0	0	0	0	0	0	0	0	0	0	0	0	0	0	0	0	0	0	0
acetaldehyde	acetaldehyde		emissions to soil	emissions to soil, unspecified	4d9a8790-3ddd-11dd-97da-0050c2490048	0	kg	Not applicable	Not applicable	Not applicable	Not applicable				1.9684e-08	1.01028e-07									8.40907			0	0	0	0	0	0	0	0	0	0	0	0	0	0	0	0	0	0	0	0	0	0
acetaldehyde	acetaldehyde		emissions to air	emissions to air, unspecified	fe0acd60-3ddc-11dd-a7a5-0050c2490048	3.56286e+07	kg	EMEP	E-PRTR	Literature	Method A	NMVOC breakdown estimates			9.51071e-08	4.88139e-07			1.08						0.292418			0	0	3.38853	17.3917	0	0	3.84789e+07	0	0	0	0	0	1.04184e+07	0	0	0	0	0.000180454	6.46779e-05	0	0	0.00243431
acetic acid	acetic acid		emissions to water	emissions to water, unspecified	08a91e70-3ddc-11dd-951b-0050c2490048	0	kg	Not applicable	Not applicable	Not applicable	Not applicable														49.8391			0	0	0	0	0	0	0	0	0	0	0	0	0	0	0	0	0	0	0	0	0	0
acetic acid	acetic acid		emissions to soil	emissions to soil, unspecified	08a91e70-3ddc-11dd-92c2-0050c2490048	0	kg	Not applicable	Not applicable	Not applicable	Not applicable														12.6438			0	0	0	0	0	0	0	0	0	0	0	0	0	0	0	0	0	0	0	0	0	0
acetic acid	acetic acid		emissions to air	emissions to air, unspecified	08a91e70-3ddc-11dd-92c3-0050c2490048	2.50405e+07	kg	EMEP	E-PRTR	Literature	Method A	NMVOC breakdown estimates							0.164						10.3826			0	0	0	0	0	0	4.10664e+06	0	0	0	0	0	2.59984e+08	0	0	0	0	0	0	0	0	0.000259801
acetochlor	acetochlor		emissions to water	emissions to water, unspecified	08a91e70-3ddc-11dd-9928-0050c2490048	0	kg	Not applicable	Not applicable	Not applicable	Not applicable														67801.3			0	0	0	0	0	0	0	0	0	0	0	0	0	0	0	0	0	0	0	0	0	0
acetochlor	Acetochlor	Pesticides (surface water)	Emissions to water	Emissions to water, unspecified	08a91e70-3ddc-11dd-9928-0050c2490048	18695.1	kg	Literature	Eurostat - harvested areas	Not applicable	Method F	Pesticides													67801.3			0	0	0	0	0	0	0	0	0	0	0	0	1.26755e+09	0	0	0	0	0	0	0	0	0
acetochlor	Acetochlor	Pesticides (air)	Emissions to air	Emissions to air, unspecified	4d9a8790-3ddd-11dd-9248-0050c2490048	280426	kg	FAOstat - Pesticide usage data	Eurostat - harvested areas	Literature	Method F	Pesticides													1698.79			0	0	0	0	0	0	0	0	0	0	0	0	4.76384e+08	0	0	0	0	0	0	0	0	0
acetochlor	Acetochlor	Pesticides (soil)	Emissions to soil	Emissions to soil, unspecified	4d9a8790-3ddd-11dd-9247-0050c2490048	1.38343e+06	kg	FAOstat - Pesticide usage data	Eurostat - harvested areas	Literature	Method F	Pesticides													7610.91			0	0	0	0	0	0	0	0	0	0	0	0	1.05292e+10	0	0	0	0	0	0	0	0	0
acetone	acetone		emissions to water	emissions to water, unspecified	08a91e70-3ddc-11dd-919f-0050c2490048	0	kg	Not applicable	Not applicable	Not applicable	Not applicable					5.86315e-09									1.21331			0	0	0	0	0	0	0	0	0	0	0	0	0	0	0	0	0	0	0	0	0	0
acetone	acetone		emissions to soil	emissions to soil, unspecified	08a91e70-3ddc-11dd-951f-0050c2490048	0	kg	Not applicable	Not applicable	Not applicable	Not applicable					2.20283e-09									0.257183			0	0	0	0	0	0	0	0	0	0	0	0	0	0	0	0	0	0	0	0	0	0
acetone	acetone		emissions to air	emissions to air, unspecified	08a91e70-3ddc-11dd-9520-0050c2490048	7.07756e+07	kg	EMEP	E-PRTR	Literature	Method A	NMVOC breakdown estimates				6.25095e-09			0.159						0.0791504			0	0	0	0.442415	0	0	1.12533e+07	0	0	0	0	0	5.60191e+06	0	0	0	0	0	1.64529e-06	0	0	0.000711926
acetone oxime	acetone oxime		emissions to water	emissions to water, unspecified	20dacac9-a535-4f7f-91a9-1ff130ec38d9	0	kg	Not applicable	Not applicable	Not applicable	Not applicable				3.51358e-06										31.2415			0	0	0	0	0	0	0	0	0	0	0	0	0	0	0	0	0	0	0	0	0	0
acetone oxime	acetone oxime		emissions to soil	emissions to soil, unspecified	d151001b-bac7-465f-96cb-9d1c8a5956a0	0	kg	Not applicable	Not applicable	Not applicable	Not applicable				4.37085e-07										2.931			0	0	0	0	0	0	0	0	0	0	0	0	0	0	0	0	0	0	0	0	0	0
acetophenone	acetophenone		emissions to air	emissions to air, unspecified	4d9a8790-3ddd-11dd-9beb-0050c2490048	2230.91	kg	EMEP	E-PRTR	Literature	Method A	NMVOC breakdown estimates				1.05938e-08									2.45285			0	0	0	2.36339e-05	0	0	0	0	0	0	0	0	5472.09	0	0	0	0	0	8.78919e-11	0	0	0
acetylene	ethylyne		emissions to air	emissions to air, unspecified	4d9a8790-3ddd-11dd-911f-0050c2490048	1.06953e+08	kg	EMEP	E-PRTR	Literature	Method A	NMVOC breakdown estimates							0.144									0	0	0	0	0	0	1.54012e+07	0	0	0	0	0	0	0	0	0	0	0	0	0	0	0.000974338
Acibenzolar-S-Methyl	Acidenzolar	Pesticides (surface water)	Emissions to water	Emissions to water, unspecified	4d9a8790-3ddd-11dd-926f-0050c2490048	241.451	kg	Literature	Eurostat - harvested areas	Not applicable	Method F	Pesticides													18237.6			0	0	0	0	0	0	0	0	0	0	0	0	4.40348e+06	0	0	0	0	0	0	0	0	0
Acibenzolar-S-Methyl	Acidenzolar	Pesticides (air)	Emissions to air	Emissions to air, unspecified	fe0acd60-3ddc-11dd-ad8a-0050c2490048	3621.77	kg	FAOstat - Pesticide usage data	Eurostat - harvested areas	Literature	Method F	Pesticides													1807.76			0	0	0	0	0	0	0	0	0	0	0	0	6.54728e+06	0	0	0	0	0	0	0	0	0
Acibenzolar-S-Methyl	Acidenzolar	Pesticides (soil)	Emissions to soil	Emissions to soil, unspecified	fe0acd60-3ddc-11dd-ad89-0050c2490048	4829.02	kg	FAOstat - Pesticide usage data	Eurostat - harvested areas	Literature	Method F	Pesticides													3608.51			0	0	0	0	0	0	0	0	0	0	0	0	1.74256e+07	0	0	0	0	0	0	0	0	0
acifluorfen	Acifluorfen	Pesticides (surface water)	Emissions to water	Emissions to water, unspecified	fe0acd60-3ddc-11dd-ad9b-0050c2490048	519.524	kg	FAOstat - Pesticide usage data	Eurostat - harvested areas	Eurostat - organic farming areas	Method F				2.6203e-06													0	0	0.00136131	0	0	0	0	0	0	0	0	0	0	0	0	0	0	7.24954e-08	0	0	0	0
acifluorfen	Acifluorfen	Pesticides (air)	Emissions to air	Emissions to air, unspecified	4d9a8790-3ddd-11dd-9274-0050c2490048	7792.86	kg	FAOstat - Pesticide usage data	Eurostat - harvested areas	Literature	Method F				1.79561e-06													0	0	0.0139929	0	0	0	0	0	0	0	0	0	0	0	0	0	0	7.45182e-07	0	0	0	0
acifluorfen	Acifluorfen	Pesticides (soil)	Emissions to soil	Emissions to soil, unspecified	4d9a8790-3ddd-11dd-9273-0050c2490048	38428.7	kg	FAOstat - Pesticide usage data	Eurostat - harvested areas	Eurostat - organic farming areas	Method F				6.25983e-08													0	0	0.00240557	0	0	0	0	0	0	0	0	0	0	0	0	0	0	1.28107e-07	0	0	0	0
aclonifen	Aclonifen	Pesticides (surface water)	Emissions to water	Emissions to water, unspecified	fe0acd60-3ddc-11dd-abd0-0050c2490048	5532.74	kg	FAOstat - Pesticide usage data	Eurostat - harvested areas	Eurostat - organic farming areas	Method F														662328			0	0	0	0	0	0	0	0	0	0	0	0	3.66449e+09	0	0	0	0	0	0	0	0	0
aclonifen	Aclonifen	Pesticides (air)	Emissions to air	Emissions to air, unspecified	3e4d9ea9-6556-11dd-ad8b-0800200c9a66	82991.2	kg	FAOstat - Pesticide usage data	Eurostat - harvested areas	Literature	Method F														17077.2			0	0	0	0	0	0	0	0	0	0	0	0	1.41726e+09	0	0	0	0	0	0	0	0	0
aclonifen	Aclonifen	Pesticides (soil)	Emissions to soil	Emissions to soil, unspecified	fe0acd60-3ddc-11dd-abcd-0050c2490048	409407	kg	FAOstat - Pesticide usage data	Eurostat - harvested areas	Eurostat - organic farming areas	Method F														8495.55			0	0	0	0	0	0	0	0	0	0	0	0	3.47814e+09	0	0	0	0	0	0	0	0	0
acrolein	acrolein		emissions to water	emissions to water, unspecified	fe0acd60-3ddc-11dd-a26e-0050c2490048	0	kg	Not applicable	Not applicable	Not applicable	Not applicable					6.66505e-05									33534.7			0	0	0	0	0	0	0	0	0	0	0	0	0	0	0	0	0	0	0	0	0	0
acrolein	acrolein		emissions to soil	emissions to soil, unspecified	08a91e70-3ddc-11dd-91a3-0050c2490048	0	kg	Not applicable	Not applicable	Not applicable	Not applicable					3.86722e-05									5442.46			0	0	0	0	0	0	0	0	0	0	0	0	0	0	0	0	0	0	0	0	0	0
acrolein	acrolein		emissions to air	emissions to air, unspecified	08a91e70-3ddc-11dd-91a4-0050c2490048	6.26805e+06	kg	EMEP	E-PRTR	Literature	Method A	NMVOC breakdown estimates				0.00073174									106.61			0	0	0	4586.59	0	0	0	0	0	0	0	0	6.68239e+08	0	0	0	0	0	0.017057	0	0	0
acrylic acid	acrylic acid		emissions to water	emissions to water, unspecified	08a91e70-3ddc-11dd-91a9-0050c2490048	0	kg	Not applicable	Not applicable	Not applicable	Not applicable					1.47158e-07									197.642			0	0	0	0	0	0	0	0	0	0	0	0	0	0	0	0	0	0	0	0	0	0
acrylic acid	acrylic acid		emissions to soil	emissions to soil, unspecified	fe0acd60-3ddc-11dd-a72b-0050c2490048	0	kg	Not applicable	Not applicable	Not applicable	Not applicable					8.19643e-07									44.228			0	0	0	0	0	0	0	0	0	0	0	0	0	0	0	0	0	0	0	0	0	0
acryolonitrile	acrylonitrile		emissions to air	emissions to air, unspecified	08a91e70-3ddc-11dd-91ae-0050c2490048	0	kg	EMEP	E-PRTR	Literature	Method A	NMVOC breakdown estimates			2.01632e-06	5.47549e-06									4.09752			0	0	0	0	0	0	0	0	0	0	0	0	0	0	0	0	0	0	0	0	0	0
acryolonitrile	acryolonitrile		emissions to water	emissions to water, unspecified	08a91e70-3ddc-11dd-9df6-0050c2490048	0	kg	Not applicable	Not applicable	Not applicable	Not applicable				3.40678e-06	4.27801e-06									354.907			0	0	0	0	0	0	0	0	0	0	0	0	0	0	0	0	0	0	0	0	0	0
acryolonitrile	acryolonitrile		emissions to soil	emissions to soil, unspecified	08a91e70-3ddc-11dd-91ad-0050c2490048	0	kg	Not applicable	Not applicable	Not applicable	Not applicable				6.6048e-07	1.16958e-06									44.5938			0	0	0	0	0	0	0	0	0	0	0	0	0	0	0	0	0	0	0	0	0	0
agriculture	*Cropland remaining Crop land	UNFCCC LULUCF - no distinction between arable and orchards	resource flows	Land occupation	e1d56d4e-afe3-4b92-bd51-0a21f75e50a8	1.28617e+12	m2*a	UNFCCC LULUCF	Not applicable	Not applicable	method R													9.7				0	0	0	0	0	0	0	0	0	0	0	1.24759e+13	0	0	0	0	0	0	0	0	0	0
aldicarb	Aldicarb	Pesticides (surface water)	Emissions to water	Emissions to water, unspecified	49d9e70e-8a45-41da-a3af-2b7e5815849c	739.873	kg	Literature	Eurostat - harvested areas	Not applicable	Method F	Pesticides			3.79779e-05										309.84			0	0	0.0280989	0	0	0	0	0	0	0	0	0	229242	0	0	0	0	1.49638e-06	0	0	0	0
aldicarb	Aldicarb	Pesticides (air)	Emissions to air	Emissions to air, unspecified	4d9a8790-3ddd-11dd-98fb-0050c2490048	11098.1	kg	FAOstat - Pesticide usage data	Eurostat - harvested areas	Literature	Method F	Pesticides				6.60416e-05									5929.57			0	0	0	0.732936	0	0	0	0	0	0	0	0	6.58069e+07	0	0	0	0	0	2.72571e-06	0	0	0
aldicarb	Aldicarb	Pesticides (soil)	Emissions to soil	Emissions to soil, unspecified	06acf621-dbb3-43a0-9b27-caf658a56615	14797.5	kg	FAOstat - Pesticide usage data	Eurostat - harvested areas	Literature	Method F	Pesticides			3.51072e-07										1.99201			0	0	0.00519497	0	0	0	0	0	0	0	0	0	29476.7	0	0	0	0	2.76654e-07	0	0	0	0
aldrin	Aldrin	Industrial releases	emissions to air	emissions to air, unspecified	4d9a8790-3ddd-11dd-8e56-0050c2490048	0	kg	E-PRTR	Not applicable	Not applicable	Method C	Toxic airborne emissions			6.61095e-05	0.000209099									566.673			0	0	0	0	0	0	0	0	0	0	0	0	0	0	0	0	0	0	0	0	0	0
aldrin	Aldrin	pesticide	emissions to soil	emissions to soil, unspecified	4d9a8790-3ddd-11dd-9905-0050c2490048	0	kg	E-PRTR	Not applicable	Not applicable	Method E				1.01498e-05	3.2103e-05									589.395			0	0	0	0	0	0	0	0	0	0	0	0	0	0	0	0	0	0	0	0	0	0
aldrin	Aldrin	Non-industrial releases	emissions to water	emissions to water, unspecified	4d9a8790-3ddd-11dd-8e5c-0050c2490048	0.000512313	kg	Waterbase	Eurostat - WWTP-connection stats	Not applicable	Method D2	Toxic waterborne emissions			0.00183061	0.00579005									265925			0	0	9.37844e-07	2.96632e-06	0	0	0	0	0	0	0	0	136.237	0	0	0	0	4.99441e-11	1.10314e-11	0	0	0
aldrin	Aldrin	Industrial releases	emissions to water	emissions to water, unspecified	4d9a8790-3ddd-11dd-8e5c-0050c2490048	689.962	kg	E-PRTR	EUROSTAT - economic data	Not applicable	Method D1	Toxic waterborne emissions			0.00183061	0.00579005									265925			0	0	1.26305	3.99492	0	0	0	0	0	0	0	0	1.83478e+08	0	0	0	0	6.72627e-05	1.48567e-05	0	0	0
alpha-cypermethrin	Alpha-cypermethrin	Pesticides (surface water)	Emissions to water	Emissions to water, unspecified	4d9a8790-3ddd-11dd-8e67-0050c2490048	72.9715	kg	Literature	Eurostat - harvested areas	Not applicable	Method F	Pesticides				5.6017e-06									3.50896e+07			0	0	0	0.000408764	0	0	0	0	0	0	0	0	2.56054e+09	0	0	0	0	0	1.52015e-09	0	0	0
alpha-cypermethrin	Alpha-cypermethrin	Pesticides (air)	Emissions to air	Emissions to air, unspecified	3e4d9e91-6556-11dd-ad8b-0800200c9a66	1094.57	kg	FAOstat - Pesticide usage data	Eurostat - harvested areas	Literature	Method F	Pesticides				2.39413e-06									461526			0	0	0	0.00262055	0	0	0	0	0	0	0	0	5.05173e+08	0	0	0	0	0	9.74556e-09	0	0	0
alpha-cypermethrin	Alpha-cypermethrin	Pesticides (soil)	Emissions to soil	Emissions to soil, unspecified	4d9a8790-3ddd-11dd-8e64-0050c2490048	1459.43	kg	FAOstat - Pesticide usage data	Eurostat - harvested areas	Literature	Method F	Pesticides				1.10772e-08									48797.7			0	0	0	1.61663e-05	0	0	0	0	0	0	0	0	7.12168e+07	0	0	0	0	0	6.01209e-11	0	0	0
Aluminium	Al		emissions to air	emissions to air, unspecified	fe0acd60-3ddc-11dd-a72e-0050c2490048	0	kg	Not applicable	Not applicable	Not applicable	Not applicable																	0	0	0	0	0	0	0	0	0	0	0	0	0	0	0	0	0	0	0	0	0	0
aluminium	Aluminium metal	metal content	resource flows	Non-renewable element resources from ground	fe0acd60-3ddc-11dd-ab5f-0050c2490048	2383157000	kg	British Geological Survey	Not applicable	Not applicable	Method K3																2.53e-05	0	0	0	0	0	0	0	0	0	0	0	0	0	0	60293.9	0	0	0	0	0	0	0
americium-241	Americium-241	from medical sector	emissions to water	emissions to sea water	fe0acd60-3ddc-11dd-acd7-0050c2490048	0	kBq	Not applicable	Not applicable	Not applicable	method N							1.5										0	0	0	0	0	0	0	0	0	0	0	0	0	0	0	0	0	0	0	0	0	0
americium-241	Americium-241	from Phosphate industry	emissions to water	emissions to sea water	fe0acd60-3ddc-11dd-acd7-0050c2490048	0	kBq	Not applicable	Not applicable	Not applicable	method N							1.5										0	0	0	0	0	0	0	0	0	0	0	0	0	0	0	0	0	0	0	0	0	0
americium-241	Americium-241	from Primary steel manufacture	emissions to water	emissions to sea water	fe0acd60-3ddc-11dd-acd7-0050c2490048	0	kBq	Not applicable	Not applicable	Not applicable	method N							1.5										0	0	0	0	0	0	0	0	0	0	0	0	0	0	0	0	0	0	0	0	0	0
americium-241	Americium-241	from radiochemical production	emissions to water	emissions to sea water	fe0acd60-3ddc-11dd-acd7-0050c2490048	0	kBq	Not applicable	Not applicable	Not applicable	method N							1.5										0	0	0	0	0	0	0	0	0	0	0	0	0	0	0	0	0	0	0	0	0	0
americium-241	Americium-241	from Rare Earth production	emissions to water	emissions to sea water	fe0acd60-3ddc-11dd-acd7-0050c2490048	0	kBq	Not applicable	Not applicable	Not applicable	method N							1.5										0	0	0	0	0	0	0	0	0	0	0	0	0	0	0	0	0	0	0	0	0	0
americium-241	Americium-241	from the offshore oil and gas industry	emissions to water	emissions to sea water	fe0acd60-3ddc-11dd-acd7-0050c2490048	0	kBq	Not applicable	Not applicable	Not applicable	method N							1.5										0	0	0	0	0	0	0	0	0	0	0	0	0	0	0	0	0	0	0	0	0	0
americium-241	Americium-241	from Titanium dioxide pigment manufacturers	emissions to water	emissions to sea water	fe0acd60-3ddc-11dd-acd7-0050c2490048	0	kBq	Not applicable	Not applicable	Not applicable	method N							1.5										0	0	0	0	0	0	0	0	0	0	0	0	0	0	0	0	0	0	0	0	0	0
americium-241	Americium-241	from universities and research	emissions to water	emissions to sea water	fe0acd60-3ddc-11dd-acd7-0050c2490048	0	kBq	Not applicable	Not applicable	Not applicable	method N							1.5										0	0	0	0	0	0	0	0	0	0	0	0	0	0	0	0	0	0	0	0	0	0
ametryne	Ametryn	Pesticides (surface water)	Emissions to water	Emissions to water, unspecified	fe0acd60-3ddc-11dd-a969-0050c2490048	54.17	kg	FAOstat - Pesticide usage data	Eurostat - harvested areas	Eurostat - organic farming areas	Method F														76178.5			0	0	0	0	0	0	0	0	0	0	0	0	4.12659e+06	0	0	0	0	0	0	0	0	0
ametryne	Ametryn	Pesticides (air)	Emissions to air	Emissions to air, unspecified	08a91e70-3ddc-11dd-9aba-0050c2490048	812.55	kg	FAOstat - Pesticide usage data	Eurostat - harvested areas	Literature	Method F														2229.91			0	0	0	0	0	0	0	0	0	0	0	0	1.81191e+06	0	0	0	0	0	0	0	0	0
ametryne	Ametryn	Pesticides (soil)	Emissions to soil	Emissions to soil, unspecified	08a91e70-3ddc-11dd-9ab9-0050c2490048	4008.58	kg	FAOstat - Pesticide usage data	Eurostat - harvested areas	Eurostat - organic farming areas	Method F														5287.32			0	0	0	0	0	0	0	0	0	0	0	0	2.11946e+07	0	0	0	0	0	0	0	0	0
amidosulfuron	Amidosulfuron	Pesticides (surface water)	Emissions to water	Emissions to water, unspecified	4d9a8790-3ddd-11dd-92db-0050c2490048	6.86147	kg	FAOstat - Pesticide usage data	Eurostat - harvested areas	Eurostat - organic farming areas	Method F																	0	0	0	0	0	0	0	0	0	0	0	0	0	0	0	0	0	0	0	0	0	0
amidosulfuron	Amidosulfuron	Pesticides (air)	Emissions to air	Emissions to air, unspecified	64b1ce59-6556-11dd-ad8b-0800200c9a66	102.922	kg	FAOstat - Pesticide usage data	Eurostat - harvested areas	Literature	Method F																	0	0	0	0	0	0	0	0	0	0	0	0	0	0	0	0	0	0	0	0	0	0
amidosulfuron	Amidosulfuron	Pesticides (soil)	Emissions to soil	Emissions to soil, unspecified	4d9a8790-3ddd-11dd-92d8-0050c2490048	507.749	kg	FAOstat - Pesticide usage data	Eurostat - harvested areas	Eurostat - organic farming areas	Method F																	0	0	0	0	0	0	0	0	0	0	0	0	0	0	0	0	0	0	0	0	0	0
amitraz	Amitraz	Pesticides (surface water)	Emissions to water	Emissions to water, unspecified	08a91e70-3ddc-11dd-9534-0050c2490048	540.719	kg	FAOstat - Pesticide usage data	Eurostat - harvested areas	Eurostat - organic farming areas	Method F					1.23072e-05									1099.62			0	0	0	0.00665473	0	0	0	0	0	0	0	0	594583	0	0	0	0	0	2.47483e-08	0	0	0
amitraz	Amitraz	Pesticides (air)	Emissions to air	Emissions to air, unspecified	08a91e70-3ddc-11dd-9c03-0050c2490048	8110.78	kg	FAOstat - Pesticide usage data	Eurostat - harvested areas	Literature	Method F					1.23903e-06									3.44951			0	0	0	0.0100495	0	0	0	0	0	0	0	0	27978.2	0	0	0	0	0	3.73731e-08	0	0	0
amitraz	Amitraz	Pesticides (soil)	Emissions to soil	Emissions to soil, unspecified	08a91e70-3ddc-11dd-9c02-0050c2490048	10814.4	kg	FAOstat - Pesticide usage data	Eurostat - harvested areas	Eurostat - organic farming areas	Method F					3.47378e-09									0.185181			0	0	0	3.75667e-05	0	0	0	0	0	0	0	0	2002.62	0	0	0	0	0	1.39707e-10	0	0	0
amitrole	Amitrol	Pesticides (surface water)	Emissions to water	Emissions to water, unspecified	08a91e70-3ddc-11dd-9c09-0050c2490048	4868.61	kg	Literature	Eurostat - harvested areas	Not applicable	Method F	Pesticides			4.6018e-06	6.28262e-06									980.599			0	0	0.0224044	0.0305877	0	0	0	0	0	0	0	0	4.77415e+06	0	0	0	0	1.19313e-06	1.13752e-07	0	0	0
amitrole	Amitrol	Pesticides (air)	Emissions to air	Emissions to air, unspecified	08a91e70-3ddc-11dd-9539-0050c2490048	73029.2	kg	FAOstat - Pesticide usage data	Eurostat - harvested areas	Literature	Method F	Pesticides			3.96963e-06	5.41956e-06									123.972			0	0	0.289899	0.395786	0	0	0	0	0	0	0	0	9.0536e+06	0	0	0	0	1.54383e-05	1.47189e-06	0	0	0
amitrole	Amitrol	Pesticides (soil)	Emissions to soil	Emissions to soil, unspecified	08a91e70-3ddc-11dd-9538-0050c2490048	304693	kg	FAOstat - Pesticide usage data	Eurostat - harvested areas	Literature	Method F	Pesticides			8.86488e-07	1.21028e-06									188.902			0	0	0.270107	0.368765	0	0	0	0	0	0	0	0	5.75572e+07	0	0	0	0	1.43843e-05	1.3714e-06	0	0	0
ammonia	ammonia		emissions to air	Emissions to air, unspecified	08a91e70-3ddc-11dd-a2a9-0050c2490048	3588030280	kg	EMEP	Not applicable	Not applicable	Method T1						0.0666667			3.02	13.5		0.092					0	0	0	0	2.39202e+08	0	0	1.08359e+10	48438408780	0	3.30099e+08	0	0	0	0	0	0	0	0	0.127773	0	0
anilazine	Anilazine	Pesticides (surface water)	Emissions to water	Emissions to water, unspecified	4d9a8790-3ddd-11dd-8e25-0050c2490048	241.451	kg	Literature	Eurostat - harvested areas	Not applicable	Method F	Pesticides				4.39483e-06									401919			0	0	0	0.00106114	0	0	0	0	0	0	0	0	9.70437e+07	0	0	0	0	0	3.94625e-09	0	0	0
anilazine	Anilazine	Pesticides (air)	Emissions to air	Emissions to air, unspecified	4d9a8790-3ddd-11dd-97a9-0050c2490048	3621.77	kg	FAOstat - Pesticide usage data	Eurostat - harvested areas	Literature	Method F	Pesticides				2.94581e-07									8881.51			0	0	0	0.0010669	0	0	0	0	0	0	0	0	3.21668e+07	0	0	0	0	0	3.9677e-09	0	0	0
anilazine	Anilazine	Pesticides (soil)	Emissions to soil	Emissions to soil, unspecified	4d9a8790-3ddd-11dd-97a8-0050c2490048	4829.02	kg	FAOstat - Pesticide usage data	Eurostat - harvested areas	Literature	Method F	Pesticides				1.93471e-07									17692.7			0	0	0	0.000934275	0	0	0	0	0	0	0	0	8.54385e+07	0	0	0	0	0	3.47447e-09	0	0	0
anthracene	Anthracene		emissions to soil	emissions to soil, unspecified	fe0acd60-3ddc-11dd-a2ff-0050c2490048	0	kg	E-PRTR	Not applicable	Not applicable	Method E					4.78602e-10									448.814			0	0	0	0	0	0	0	0	0	0	0	0	0	0	0	0	0	0	0	0	0	0
anthracene	Anthracene	Non-industrial releases	emissions to water	emissions to water, unspecified	08a91e70-3ddc-11dd-9684-0050c2490048	409.797	kg	Waterbase	Eurostat - WWTP-connection stats	Not applicable	Method D2	Toxic waterborne emissions				1.48246e-07									261935			0	0	0	6.07509e-05	0	0	0	0	0	0	0	0	1.0734e+08	0	0	0	0	0	2.25926e-10	0	0	0
anthracene	Anthracene	Industrial releases	emissions to water	emissions to water, unspecified	08a91e70-3ddc-11dd-9684-0050c2490048	2579.25	kg	E-PRTR	EUROSTAT - economic data	Not applicable	Method D1	Toxic waterborne emissions				1.48246e-07									261935			0	0	0	0.000382364	0	0	0	0	0	0	0	0	6.75595e+08	0	0	0	0	0	1.42197e-09	0	0	0
anthracene	Anthracene		emissions to air	emissions to air, unspecified	fe0acd60-3ddc-11dd-a300-0050c2490048	3691.8	kg	EMEP	E-PRTR	Not applicable	Method C	Toxic airborne emissions				7.54061e-09									689.479			0	0	0	2.78384e-05	0	0	0	0	0	0	0	0	2.54542e+06	0	0	0	0	0	1.03528e-10	0	0	0
antimony	Antimony	metal content - not mined in EU27	resource flows	Non-renewable element resources from ground	08a91e70-3ddc-11dd-91d5-0050c2490048	0	kg	British Geological Survey	Not applicable	Not applicable	Method K3																1	0	0	0	0	0	0	0	0	0	0	0	0	0	0	0	0	0	0	0	0	0	0
Antimony	Sb		emissions to air	emissions to air, unspecified	08a91e70-3ddc-11dd-9689-0050c2490048	0	kg	Not applicable	Not applicable	Not applicable	Not applicable					0.000170539									76487.7			0	0	0	0	0	0	0	0	0	0	0	0	0	0	0	0	0	0	0	0	0	0
antimony-122	Antimony-122	from gypsum end-of-life	emissions to water	emissions to water, unspecified	4d9a8790-3ddd-11dd-977a-0050c2490048	2.33386	kBq	Eurostat - Prodcom	Not applicable	Not applicable	Method O	Ionizing radiation emissions from gypsum plaster and ceramics end of life																0	0	0	0	0	0	0	0	0	0	0	0	0	0	0	0	0	0	0	0	0	0
antimony-122	Antimony-122	from electricity production	emissions to water	emissions to water, unspecified	4d9a8790-3ddd-11dd-977a-0050c2490048	221763	kBq	Eurostat - Energy	ecoinvent 3	UNSCEAR	Method M1	Upscaling ionizing radiation from electricity production																0	0	0	0	0	0	0	0	0	0	0	0	0	0	0	0	0	0	0	0	0	0
antimony-124	Antimony-124	from gypsum end-of-life	emissions to air	emissions to air, unspecified	4d9a8790-3ddd-11dd-977b-0050c2490048	0.00496818	kBq	Eurostat - Prodcom	ecoinvent 3	Not applicable	Method O	Ionizing radiation emissions from gypsum plaster and ceramics end of life																0	0	0	0	0	0	0	0	0	0	0	0	0	0	0	0	0	0	0	0	0	0
antimony-124	Antimony-124	from gypsum end-of-life	emissions to water	emissions to water, unspecified	4d9a8790-3ddd-11dd-9781-0050c2490048	138.024	kBq	Eurostat - Prodcom	Not applicable	Not applicable	Method O	Ionizing radiation emissions from gypsum plaster and ceramics end of life						0.0386										0	0	0	0	0	5.32774	0	0	0	0	0	0	0	0	0	0	0	0	0	0	9.44272e-12	0
antimony-124	Antimony-124	from electricity production	emissions to air	emissions to air, unspecified	4d9a8790-3ddd-11dd-977b-0050c2490048	274.034	kBq	Eurostat - Energy	ecoinvent 3	UNSCEAR	Method M1	Upscaling ionizing radiation from electricity production																0	0	0	0	0	0	0	0	0	0	0	0	0	0	0	0	0	0	0	0	0	0
antimony-124	Antimony-124	from electricity production	emissions to water	emissions to water, unspecified	4d9a8790-3ddd-11dd-9781-0050c2490048	1.53052e+07	kBq	Eurostat - Energy	ecoinvent 3	UNSCEAR	Method M1	Upscaling ionizing radiation from electricity production						0.0386										0	0	0	0	0	590781	0	0	0	0	0	0	0	0	0	0	0	0	0	0	1.04708e-06	0
antimony-125	Antimony-125	from gypsum end-of-life	emissions to air	emissions to air, unspecified	32cc854d-6556-11dd-ad8b-0800200c9a66	0.0604118	kBq	Eurostat - Prodcom	ecoinvent 3	Not applicable	Method O	Ionizing radiation emissions from gypsum plaster and ceramics end of life																0	0	0	0	0	0	0	0	0	0	0	0	0	0	0	0	0	0	0	0	0	0
antimony-125	Antimony-125	from gypsum end-of-life	emissions to water	emissions to sea water	32ccac60-6556-11dd-ad8b-0800200c9a66	130.974	kBq	Eurostat - Prodcom	Not applicable	Not applicable	Method O	Ionizing radiation emissions from gypsum plaster and ceramics end of life						0.0007										0	0	0	0	0	0.0916818	0	0	0	0	0	0	0	0	0	0	0	0	0	0	1.62494e-13	0
antimony-125	Antimony-125	from electricity production	emissions to air	emissions to air, unspecified	32cc854d-6556-11dd-ad8b-0800200c9a66	5740.34	kBq	Eurostat - Energy	ecoinvent 3	UNSCEAR	Method M1	Upscaling ionizing radiation from electricity production																0	0	0	0	0	0	0	0	0	0	0	0	0	0	0	0	0	0	0	0	0	0
antimony-125	Antimony-125	from electricity production	emissions to water	emissions to sea water	32ccac60-6556-11dd-ad8b-0800200c9a66	1.3841e+07	kBq	Eurostat - Energy	ecoinvent 3	UNSCEAR	Method M1	Upscaling ionizing radiation from electricity production						0.0007										0	0	0	0	0	9688.72	0	0	0	0	0	0	0	0	0	0	0	0	0	0	1.7172e-08	0
argon-41	Argon-41	from gypsum end-of-life	emissions to air	emissions to air, unspecified	fe0acd60-3ddc-11dd-a355-0050c2490048	12328.6	kBq	Eurostat - Prodcom	ecoinvent 3	Not applicable	Method O	Ionizing radiation emissions from gypsum plaster and ceramics end of life																0	0	0	0	0	0	0	0	0	0	0	0	0	0	0	0	0	0	0	0	0	0
argon-41	Argon-41	from electricity production	emissions to air	emissions to air, unspecified	fe0acd60-3ddc-11dd-a355-0050c2490048	3.67899e+09	kBq	Eurostat - Energy	ecoinvent 3	UNSCEAR	Method M1	Upscaling ionizing radiation from electricity production																0	0	0	0	0	0	0	0	0	0	0	0	0	0	0	0	0	0	0	0	0	0
arsenic	Arsenic	Non-industrial releases	emissions to water	emissions to water, unspecified	08a91e70-3ddc-11dd-91e1-0050c2490048	13235.4	kg	Waterbase	Eurostat - WWTP-connection stats	Not applicable	Method D2	Toxic waterborne emissions			0.000368977	0.0273317									40390.2			0	0	4.88356	361.745	0	0	0	0	0	0	0	0	5.34581e+08	0	0	0	0	0.00026007	0.00134529	0	0	0
arsenic	Arsenic	manure	emissions to soil	emissions to soil, unspecified	08a91e70-3ddc-11dd-91d6-0050c2490048	160175	kg	FAOstat - manure application	Literature	Not applicable	Method E				0.000195143	0.0144551									21361.4			0	0	31.2571	2315.34	0	0	0	0	0	0	0	0	3.42157e+09	0	0	0	0	0.00166457	0.00861051	0	0	0
Arsenic	As		emissions to air	emissions to air, unspecified	08a91e70-3ddc-11dd-91d7-0050c2490048	208174	kg	EMEP	E-PRTR	Not applicable	Method C	Toxic airborne emissions			0.000333161	0.0167965									16994.5			0	0	69.3555	3496.58	0	0	0	0	0	0	0	0	3.53781e+09	0	0	0	0	0.00369348	0.0130034	0	0	0
arsenic	Arsenic ores - metal content	metal content	resource flows	Non-renewable element resources from ground	08a91e70-3ddc-11dd-91e4-0050c2490048	1.09636e+06	kg	British Geological Survey	Not applicable	Not applicable	Method K3																2.4	0	0	0	0	0	0	0	0	0	0	0	0	0	0	2.63127e+06	0	0	0	0	0	0	0
arsenic V	arsenic V	Industrial releases	emissions to soil	emissions to soil, unspecified	de91f22d-8183-47a3-82be-77a4124602a4	346	kg	E-PRTR	Not applicable	Not applicable	Not applicable				0.000195143	0.0144551									21361.4			0	0	0.0675196	5.00145	0	0	0	0	0	0	0	0	7.39106e+06	0	0	0	0	3.5957e-06	1.85999e-05	0	0	0
arsenic V	Arsenic and compounds (as As)	Industrial releases	emissions to water	emissions to water, unspecified	4007d987-5da9-4396-b284-f69be9c54da0	66726.7	kg	E-PRTR	EUROSTAT - economic data	Not applicable	Method D1	Toxic waterborne emissions			0.000368977	0.0273317									40390.2			0	0	24.6207	1823.75	0	0	0	0	0	0	0	0	2.69511e+09	0	0	0	0	0.00131115	0.00678234	0	0	0
artificial areas	*Settlements remaining Settlements	UNFCCC LULUCF - no disaggregation available	resource flows	Land occupation	3f52e820-a921-4ddb-a51b-45fdabc77d6e	2.21539e+11	m2*a	UNFCCC LULUCF	Not applicable	Not applicable	method R													14.6				0	0	0	0	0	0	0	0	0	0	0	3.23447e+12	0	0	0	0	0	0	0	0	0	0
asbestos (white)	Asbestos		resource flows	Non-renewable material resources from ground	fe0acd60-3ddc-11dd-a7ba-0050c2490048	0	kg	Eurostat - Prodcom	Not applicable	Not applicable	missing in statistics	Time interpolation for resource depletion - metal ores and minerals																0	0	0	0	0	0	0	0	0	0	0	0	0	0	0	0	0	0	0	0	0	0
asulam	Asulam		emissions to air	emissions to air, unspecified	fe0acd60-3ddc-11dd-a952-0050c2490048	0	kg	Not applicable	Not applicable	Not applicable	Not applicable					3.2979e-07									13.7708			0	0	0	0	0	0	0	0	0	0	0	0	0	0	0	0	0	0	0	0	0	0
asulam	Asulam		emissions to water	emissions to water, unspecified	fe0acd60-3ddc-11dd-a3c7-0050c2490048	0	kg	Not applicable	Not applicable	Not applicable	Not applicable					8.30981e-07									216.099			0	0	0	0	0	0	0	0	0	0	0	0	0	0	0	0	0	0	0	0	0	0
asulam	Asulam		emissions to soil	emissions to soil, unspecified	fe0acd60-3ddc-11dd-a3c4-0050c2490048	0	kg	Not applicable	Not applicable	Not applicable	Not applicable					1.89738e-07									49.3384			0	0	0	0	0	0	0	0	0	0	0	0	0	0	0	0	0	0	0	0	0	0
atrazine	Atrazine	Non-industrial releases	emissions to water	emissions to water, unspecified	08a91e70-3ddc-11dd-9631-0050c2490048	11.2321	kg	Waterbase	Eurostat - WWTP-connection stats	Not applicable	Method D2	Toxic waterborne emissions			3.72919e-06	4.32305e-06									87654.2			0	0	4.18866e-05	4.85569e-05	0	0	0	0	0	0	0	0	984540	0	0	0	0	2.23064e-09	1.80578e-10	0	0	0
atrazine	Atrazine	Industrial releases	emissions to water	emissions to water, unspecified	08a91e70-3ddc-11dd-9631-0050c2490048	394.464	kg	E-PRTR	EUROSTAT - economic data	Not applicable	Method D1	Toxic waterborne emissions			3.72919e-06	4.32305e-06									87654.2			0	0	0.00147103	0.00170529	0	0	0	0	0	0	0	0	3.45765e+07	0	0	0	0	7.83386e-08	6.34179e-09	0	0	0
atrazine	Atrazine	Pesticides (surface water)	Emissions to water	Emissions to water, unspecified	08a91e70-3ddc-11dd-9631-0050c2490048	13130.5	kg	FAOstat - Pesticide usage data	Eurostat - harvested areas	Literature	Method F	Pesticides			3.72919e-06	4.32305e-06									87654.2			0	0	0.0489663	0.056764	0	0	0	0	0	0	0	0	1.15095e+09	0	0	0	0	2.60766e-06	2.11099e-07	0	0	0
atrazine	Atrazine	Pesticides (air)	Emissions to air	Emissions to air, unspecified	fe0acd60-3ddc-11dd-a3cc-0050c2490048	196958	kg	FAOstat - Pesticide usage data	Eurostat - harvested areas	Literature	Method F	Pesticides			1.205e-06	1.39689e-06									3705.37			0	0	0.237334	0.275129	0	0	0	0	0	0	0	0	7.29802e+08	0	0	0	0	1.2639e-05	1.02317e-06	0	0	0
atrazine	Atrazine	Pesticides (soil)	Emissions to soil	Emissions to soil, unspecified	fe0acd60-3ddc-11dd-a3cb-0050c2490048	969346	kg	FAOstat - Pesticide usage data	Eurostat - harvested areas	Literature	Method F	Pesticides			4.86196e-07	5.63621e-07									11406.4			0	0	0.471292	0.546344	0	0	0	0	0	0	0	0	1.10568e+10	0	0	0	0	2.50983e-05	2.0318e-06	0	0	0
azinphos-ethyl	Azinphos-ethyl	Pesticides (surface water)	Emissions to water	Emissions to water, unspecified	08a91e70-3ddc-11dd-a2da-0050c2490048	578.864	kg	Literature	Eurostat - harvested areas	Not applicable	Method F	Pesticides													1.85309e+06			0	0	0	0	0	0	0	0	0	0	0	0	1.07269e+09	0	0	0	0	0	0	0	0	0
azinphos-ethyl	Azinphos-ethyl	Pesticides (air)	Emissions to air	Emissions to air, unspecified	08a91e70-3ddc-11dd-a2d4-0050c2490048	8682.96	kg	FAOstat - Pesticide usage data	Eurostat - harvested areas	Literature	Method F	Pesticides													19532.9			0	0	0	0	0	0	0	0	0	0	0	0	1.69603e+08	0	0	0	0	0	0	0	0	0
azinphos-ethyl	Azinphos-ethyl	Pesticides (soil)	Emissions to soil	Emissions to soil, unspecified	08a91e70-3ddc-11dd-91ed-0050c2490048	11577.3	kg	FAOstat - Pesticide usage data	Eurostat - harvested areas	Literature	Method F	Pesticides													163634			0	0	0	0	0	0	0	0	0	0	0	0	1.89443e+09	0	0	0	0	0	0	0	0	0
azinphos-methyl	Azinphos-methyl	Pesticides (surface water)	Emissions to water	Emissions to water, unspecified	08a91e70-3ddc-11dd-9a8b-0050c2490048	578.864	kg	Literature	Eurostat - harvested areas	Not applicable	Method F	Pesticides				3.23225e-05									539247			0	0	0	0.0187103	0	0	0	0	0	0	0	0	3.12151e+08	0	0	0	0	0	6.95817e-08	0	0	0
azinphos-methyl	Azinphos-methyl	Pesticides (air)	Emissions to air	Emissions to air, unspecified	08a91e70-3ddc-11dd-91ee-0050c2490048	8682.96	kg	FAOstat - Pesticide usage data	Eurostat - harvested areas	Literature	Method F	Pesticides				3.35134e-06									7753.93			0	0	0	0.0290995	0	0	0	0	0	0	0	0	6.7327e+07	0	0	0	0	0	1.08218e-07	0	0	0
azinphos-methyl	Azinphos-methyl	Pesticides (soil)	Emissions to soil	Emissions to soil, unspecified	08a91e70-3ddc-11dd-a2de-0050c2490048	11577.3	kg	FAOstat - Pesticide usage data	Eurostat - harvested areas	Literature	Method F	Pesticides				2.70063e-06									44920.3			0	0	0	0.0312659	0	0	0	0	0	0	0	0	5.20054e+08	0	0	0	0	0	1.16275e-07	0	0	0
aziprotryne	Aziprotryn	Pesticides (surface water)	Emissions to water	Emissions to water, unspecified	3e3b3927-b7a2-4f8f-b63f-0d39fe382579	54.17	kg	FAOstat - Pesticide usage data	Eurostat - harvested areas	Eurostat - organic farming areas	Method F														1139.74			0	0	0	0	0	0	0	0	0	0	0	0	61739.6	0	0	0	0	0	0	0	0	0
aziprotryne	Aziprotryn	Pesticides (air)	Emissions to air	Emissions to air, unspecified	9c9a3756-e8ca-4fd9-8855-e6de394c704a	812.55	kg	FAOstat - Pesticide usage data	Eurostat - harvested areas	Literature	Method F														82.9789			0	0	0	0	0	0	0	0	0	0	0	0	67424.5	0	0	0	0	0	0	0	0	0
aziprotryne	Aziprotryn	Pesticides (soil)	Emissions to soil	Emissions to soil, unspecified	acf7f77b-23a7-4091-bc75-c35e7ef8189b	4008.58	kg	FAOstat - Pesticide usage data	Eurostat - harvested areas	Eurostat - organic farming areas	Method F														67.9497			0	0	0	0	0	0	0	0	0	0	0	0	272382	0	0	0	0	0	0	0	0	0
azoxystrobin	Azoxystrobin	Pesticides (surface water)	Emissions to water	Emissions to water, unspecified	08a91e70-3ddc-11dd-9a92-0050c2490048	2830.19	kg	Literature	Eurostat - harvested areas	Not applicable	Method F	Pesticides													73119.2			0	0	0	0	0	0	0	0	0	0	0	0	2.06941e+08	0	0	0	0	0	0	0	0	0
azoxystrobin	Azoxystrobin	Pesticides (air)	Emissions to air	Emissions to air, unspecified	08a91e70-3ddc-11dd-9c80-0050c2490048	42452.8	kg	FAOstat - Pesticide usage data	Eurostat - harvested areas	Literature	Method F	Pesticides													2782.71			0	0	0	0	0	0	0	0	0	0	0	0	1.18134e+08	0	0	0	0	0	0	0	0	0
azoxystrobin	Azoxystrobin	Pesticides (soil)	Emissions to soil	Emissions to soil, unspecified	08a91e70-3ddc-11dd-9a8f-0050c2490048	56603.7	kg	FAOstat - Pesticide usage data	Eurostat - harvested areas	Literature	Method F	Pesticides													819.751			0	0	0	0	0	0	0	0	0	0	0	0	4.6401e+07	0	0	0	0	0	0	0	0	0
Barium	Ba		emissions to air	emissions to air, unspecified	fe0acd60-3ddc-11dd-a800-0050c2490048	0	kg	Not applicable	Not applicable	Not applicable	Not applicable					4.18682e-05									609.641			0	0	0	0	0	0	0	0	0	0	0	0	0	0	0	0	0	0	0	0	0	0
barium-140	Barium-140	from gypsum end-of-life	emissions to air	emissions to air, unspecified	4d9a8790-3ddd-11dd-96cc-0050c2490048	3.22298	kBq	Eurostat - Prodcom	ecoinvent 3	Not applicable	Method O	Ionizing radiation emissions from gypsum plaster and ceramics end of life																0	0	0	0	0	0	0	0	0	0	0	0	0	0	0	0	0	0	0	0	0	0
barium-140	Barium-140	from gypsum end-of-life	emissions to water	emissions to water, unspecified	4d9a8790-3ddd-11dd-978a-0050c2490048	8.38455	kBq	Eurostat - Prodcom	Not applicable	Not applicable	Method O	Ionizing radiation emissions from gypsum plaster and ceramics end of life																0	0	0	0	0	0	0	0	0	0	0	0	0	0	0	0	0	0	0	0	0	0
barium-140	Barium-140	from electricity production	emissions to air	emissions to air, unspecified	4d9a8790-3ddd-11dd-96cc-0050c2490048	135711	kBq	Eurostat - Energy	ecoinvent 3	UNSCEAR	Method M1	Upscaling ionizing radiation from electricity production																0	0	0	0	0	0	0	0	0	0	0	0	0	0	0	0	0	0	0	0	0	0
barium-140	Barium-140	from electricity production	emissions to water	emissions to water, unspecified	4d9a8790-3ddd-11dd-978a-0050c2490048	352939	kBq	Eurostat - Energy	ecoinvent 3	UNSCEAR	Method M1	Upscaling ionizing radiation from electricity production																0	0	0	0	0	0	0	0	0	0	0	0	0	0	0	0	0	0	0	0	0	0
bauxite	Bauxite	metal content	resource flows	Non-renewable material resources from ground	08a91e70-3ddc-11dd-97dd-0050c2490048	2267000000	kg	British Geological Survey	Not applicable	Not applicable	Method K3																8.7e-06	0	0	0	0	0	0	0	0	0	0	0	0	0	0	19722.9	0	0	0	0	0	0	0
benazolin	Benazolin	Pesticides (surface water)	Emissions to water	Emissions to water, unspecified	d7e1bb6e-7fc8-4867-8d75-0b6f70e20377	121.236	kg	FAOstat - Pesticide usage data	Eurostat - harvested areas	Eurostat - organic farming areas	Method F														150.207			0	0	0	0	0	0	0	0	0	0	0	0	18210.5	0	0	0	0	0	0	0	0	0
benazolin	Benazolin	Pesticides (air)	Emissions to air	Emissions to air, unspecified	81405f88-f9cc-47bb-8a31-fdffe552eeb3	1818.55	kg	FAOstat - Pesticide usage data	Eurostat - harvested areas	Literature	Method F														17.0071			0	0	0	0	0	0	0	0	0	0	0	0	30928.2	0	0	0	0	0	0	0	0	0
benazolin	Benazolin	Pesticides (soil)	Emissions to soil	Emissions to soil, unspecified	21c1f182-2e39-4c80-ad72-46be3bcd29c1	7113.48	kg	FAOstat - Pesticide usage data	Eurostat - harvested areas	Eurostat - organic farming areas	Method F														21.1235			0	0	0	0	0	0	0	0	0	0	0	0	150262	0	0	0	0	0	0	0	0	0
benefin	Benfluralin	Pesticides (surface water)	Emissions to water	Emissions to water, unspecified	08a91e70-3ddc-11dd-9c8c-0050c2490048	1815.73	kg	Literature	Eurostat - harvested areas	Not applicable	Method F	Pesticides				1.11388e-07									17938.8			0	0	0	0.000202251	0	0	0	0	0	0	0	0	3.25721e+07	0	0	0	0	0	7.5215e-10	0	0	0
benefin	Benfluralin	Pesticides (air)	Emissions to air	Emissions to air, unspecified	08a91e70-3ddc-11dd-9c86-0050c2490048	27236	kg	FAOstat - Pesticide usage data	Eurostat - harvested areas	Literature	Method F	Pesticides				4.39664e-08									17.5577			0	0	0	0.00119747	0	0	0	0	0	0	0	0	478201	0	0	0	0	0	4.45325e-09	0	0	0
benefin	Benfluralin	Pesticides (soil)	Emissions to soil	Emissions to soil, unspecified	08a91e70-3ddc-11dd-9c85-0050c2490048	133163	kg	FAOstat - Pesticide usage data	Eurostat - harvested areas	Literature	Method F	Pesticides				6.50464e-09									129.849			0	0	0	0.000866181	0	0	0	0	0	0	0	0	1.72912e+07	0	0	0	0	0	3.22124e-09	0	0	0
benfuracarb	Benfuracarb	Pesticides (surface water)	Emissions to water	Emissions to water, unspecified	9496d2af-9a50-4f69-84f7-57d842e32591	425.418	kg	FAOstat - Pesticide usage data	Eurostat - harvested areas	Eurostat - organic farming areas	Method F														212799			0	0	0	0	0	0	0	0	0	0	0	0	9.05285e+07	0	0	0	0	0	0	0	0	0
benfuracarb	Benfuracarb	Pesticides (air)	Emissions to air	Emissions to air, unspecified	ab0ab3cb-9272-47e2-938a-95672e10b551	6381.26	kg	FAOstat - Pesticide usage data	Eurostat - harvested areas	Literature	Method F														3017.35			0	0	0	0	0	0	0	0	0	0	0	0	1.92545e+07	0	0	0	0	0	0	0	0	0
benfuracarb	Benfuracarb	Pesticides (soil)	Emissions to soil	Emissions to soil, unspecified	de2e1e4d-050c-4fbb-82b5-61e5990889f7	8508.35	kg	FAOstat - Pesticide usage data	Eurostat - harvested areas	Eurostat - organic farming areas	Method F														4307.54			0	0	0	0	0	0	0	0	0	0	0	0	3.665e+07	0	0	0	0	0	0	0	0	0
benomyl	Benomyl	Pesticides (surface water)	Emissions to water	Emissions to water, unspecified	fe0acd60-3ddc-11dd-a9f0-0050c2490048	1137.99	kg	Literature	Eurostat - harvested areas	Not applicable	Method F	Pesticides				1.43962e-07									24044.6			0	0	0	0.000163827	0	0	0	0	0	0	0	0	2.73626e+07	0	0	0	0	0	6.09257e-10	0	0	0
benomyl	Benomyl	Pesticides (air)	Emissions to air	Emissions to air, unspecified	4d9a8790-3ddd-11dd-978e-0050c2490048	17069.9	kg	FAOstat - Pesticide usage data	Eurostat - harvested areas	Literature	Method F	Pesticides				3.2357e-08									266.806			0	0	0	0.00055233	0	0	0	0	0	0	0	0	4.55434e+06	0	0	0	0	0	2.05406e-09	0	0	0
benomyl	Benomyl	Pesticides (soil)	Emissions to soil	Emissions to soil, unspecified	4d9a8790-3ddd-11dd-978d-0050c2490048	22759.8	kg	FAOstat - Pesticide usage data	Eurostat - harvested areas	Literature	Method F	Pesticides				2.14681e-09									358.562			0	0	0	4.88611e-05	0	0	0	0	0	0	0	0	8.16081e+06	0	0	0	0	0	1.81709e-10	0	0	0
bentazone	Bentazone	Pesticides (surface water)	Emissions to water	Emissions to water, unspecified	08a91e70-3ddc-11dd-91f5-0050c2490048	3916.78	kg	Literature	Eurostat - harvested areas	Not applicable	Method F	Pesticides				1.24083e-06									200.663			0	0	0	0.00486006	0	0	0	0	0	0	0	0	785953	0	0	0	0	0	1.8074e-08	0	0	0
bentazone	Bentazone	Pesticides (air)	Emissions to air	Emissions to air, unspecified	fe0acd60-3ddc-11dd-a9f5-0050c2490048	58751.7	kg	FAOstat - Pesticide usage data	Eurostat - harvested areas	Literature	Method F	Pesticides				2.86193e-07									8.11005			0	0	0	0.0168143	0	0	0	0	0	0	0	0	476479	0	0	0	0	0	6.25306e-08	0	0	0
bentazone	Bentazone	Pesticides (soil)	Emissions to soil	Emissions to soil, unspecified	fe0acd60-3ddc-11dd-a9f4-0050c2490048	289614	kg	FAOstat - Pesticide usage data	Eurostat - harvested areas	Literature	Method F	Pesticides				3.06536e-07									49.5283			0	0	0	0.088777	0	0	0	0	0	0	0	0	1.43441e+07	0	0	0	0	0	3.30152e-07	0	0	0
benzaldehyde	benzaldehyde		emissions to water	emissions to water, unspecified	08a91e70-3ddc-11dd-91fd-0050c2490048	0	kg	Not applicable	Not applicable	Not applicable	Not applicable				2.61105e-08	3.38782e-08									348.598			0	0	0	0	0	0	0	0	0	0	0	0	0	0	0	0	0	0	0	0	0	0
benzaldehyde	benzaldehyde		emissions to soil	emissions to soil, unspecified	08a91e70-3ddc-11dd-91f6-0050c2490048	0	kg	Not applicable	Not applicable	Not applicable	Not applicable				4.7415e-09	6.15205e-09									54.5482			0	0	0	0	0	0	0	0	0	0	0	0	0	0	0	0	0	0	0	0	0	0
benzaldehyde	benzaldehyde		emissions to air	emissions to air, unspecified	08a91e70-3ddc-11dd-91f7-0050c2490048	3.00534e+07	kg	EMEP	E-PRTR	Literature	Method A	NMVOC breakdown estimates			1.80627e-08	2.34362e-08			-0.155						3.14636			0	0	0.542846	0.704337	0	0	-4.65828e+06	0	0	0	0	0	9.45588e+07	0	0	0	0	2.89088e-05	2.61936e-06	0	0	-0.0002947
benzene	Benzene	Non-industrial releases	emissions to water	emissions to water, unspecified	4d9a8790-3ddd-11dd-9cc9-0050c2490048	52148.7	kg	Waterbase	Eurostat - WWTP-connection stats	Not applicable	Method D2	Toxic waterborne emissions			2.42356e-07	6.13689e-08									65.9831			0	0	0.0126386	0.00320031	0	0	0	0	0	0	0	0	3.44093e+06	0	0	0	0	6.73058e-07	1.19016e-08	0	0	0
benzene	Benzene	Industrial releases	emissions to water	emissions to water, unspecified	4d9a8790-3ddd-11dd-9cc9-0050c2490048	3.05868e+06	kg	E-PRTR	EUROSTAT - economic data	Not applicable	Method D1	Toxic waterborne emissions			2.42356e-07	6.13689e-08									65.9831			0	0	0.74129	0.187708	0	0	0	0	0	0	0	0	2.01821e+08	0	0	0	0	3.94768e-05	6.98065e-07	0	0	0
benzene	benzene		emissions to air	emissions to air, unspecified	08a91e70-3ddc-11dd-9202-0050c2490048	1.59056e+08	kg	EMEP	E-PRTR	Literature	Method A	NMVOC breakdown estimates			2.97026e-07	7.52121e-08			0.368						0.0639986			0	0	47.2437	11.9629	0	0	5.85326e+07	0	0	0	0	0	1.01794e+07	0	0	0	0	0.00251593	4.44889e-05	0	0	0.00370299
benzo[a]anthracene	benzo[a]anthracene		emissions to water	emissions to water, unspecified	fe0acd60-3ddc-11dd-a2b6-0050c2490048	0	kg	Not applicable	Not applicable	Not applicable	Not applicable														793687			0	0	0	0	0	0	0	0	0	0	0	0	0	0	0	0	0	0	0	0	0	0
benzo[a]anthracene	benzo[a]anthracene		emissions to soil	emissions to soil, unspecified	fe0acd60-3ddc-11dd-a2af-0050c2490048	0	kg	Not applicable	Not applicable	Not applicable	Not applicable														250.732			0	0	0	0	0	0	0	0	0	0	0	0	0	0	0	0	0	0	0	0	0	0
benzo[a]pyrene	Benzo(a)pyrene		emissions to soil	emissions to soil, unspecified	08a91e70-3ddc-11dd-9220-0050c2490048	0	kg	Not applicable	Not applicable	Not applicable	Not applicable				7.68665e-09										2.09001			0	0	0	0	0	0	0	0	0	0	0	0	0	0	0	0	0	0	0	0	0	0
benzo[a]pyrene	Benzo(a)pyrene	Industrial releases	emissions to water	emissions to water, unspecified	08a91e70-3ddc-11dd-9227-0050c2490048	7.02813	kg	Not applicable	Not applicable	Not applicable	Not applicable				3.41847e-05										11721.3			0	0	0.000240254	0	0	0	0	0	0	0	0	0	82378.7	0	0	0	0	1.27946e-08	0	0	0	0
benzo[a]pyrene	Benzo(a)pyrene	Non-industrial releases	emissions to water	Emissions to water, unspecified	08a91e70-3ddc-11dd-9227-0050c2490048	726.593	kg	Waterbase	Eurostat - WWTP-connection stats	Not applicable	Method D2	Toxic waterborne emissions			3.41847e-05										11721.3			0	0	0.0248384	0	0	0	0	0	0	0	0	0	8.5166e+06	0	0	0	0	1.32275e-06	0	0	0	0
benzo[a]pyrene	benzo(a)pyrene		emissions to air	emissions to air, unspecified	08a91e70-3ddc-11dd-9221-0050c2490048	189201	kg	EMEP	E-PRTR	Not applicable	Method C	Toxic airborne emissions			3.48799e-05										107.015			0	0	6.59931	0	0	0	0	0	0	0	0	0	2.02473e+07	0	0	0	0	0.000351441	0	0	0	0
benzo[b]fluoranthene	Benzo(b)fluoranthene		emissions to soil	emissions to soil, unspecified	fe0acd60-3ddc-11dd-b0dd-0050c2490048	0	kg	Not applicable	Not applicable	Not applicable	Not applicable																	0	0	0	0	0	0	0	0	0	0	0	0	0	0	0	0	0	0	0	0	0	0
benzo[b]fluoranthene	Benzo(b)fluoranthene	Industrial releases	emissions to water	emissions to water, unspecified	fe0acd60-3ddc-11dd-b0e4-0050c2490048	9.426	kg	E-PRTR	EUROSTAT - economic data	Not applicable	Method D																	0	0	0	0	0	0	0	0	0	0	0	0	0	0	0	0	0	0	0	0	0	0
benzo[b]fluoranthene	Benzo(b)fluoranthene	Non-industrial releases	emissions to water	Emissions to water, unspecified	fe0acd60-3ddc-11dd-b0e4-0050c2490048	1011.66	kg	Waterbase	Eurostat - WWTP-connection stats	Not applicable	Method D2	Toxic waterborne emissions																0	0	0	0	0	0	0	0	0	0	0	0	0	0	0	0	0	0	0	0	0	0
benzo[b]fluoranthene	benzo(b) fluoranthene		emissions to air	emissions to air, unspecified	fe0acd60-3ddc-11dd-b0de-0050c2490048	163968	kg	EMEP	E-PRTR	Not applicable	Method C	Toxic airborne emissions																0	0	0	0	0	0	0	0	0	0	0	0	0	0	0	0	0	0	0	0	0	0
benzo[g,h,i]perylene	Benzo(g,h,i)perylene		emissions to soil	emissions to soil, unspecified	4d9a8790-3ddd-11dd-9495-0050c2490048	0	kg	E-PRTR	Not applicable	Not applicable	Method E																	0	0	0	0	0	0	0	0	0	0	0	0	0	0	0	0	0	0	0	0	0	0
benzo[g,h,i]perylene	Benzo(g,h,i)perylene		emissions to air	emissions to air, unspecified	4d9a8790-3ddd-11dd-9496-0050c2490048	0	kg	Not applicable	Not applicable	Not applicable	Not applicable																	0	0	0	0	0	0	0	0	0	0	0	0	0	0	0	0	0	0	0	0	0	0
benzo[g,h,i]perylene	Benzo(g,h,i)perylene	Industrial releases	emissions to water	emissions to water, unspecified	4d9a8790-3ddd-11dd-949c-0050c2490048	5.795	kg	E-PRTR	EUROSTAT - economic data	Not applicable	Method D																	0	0	0	0	0	0	0	0	0	0	0	0	0	0	0	0	0	0	0	0	0	0
benzo[g,h,i]perylene	Benzo(g,h,i)perylene	Non-industrial releases	emissions to water	Emissions to water, unspecified	4d9a8790-3ddd-11dd-949c-0050c2490048	565.831	kg	Waterbase	Eurostat - WWTP-connection stats	Not applicable	Method D2	Toxic waterborne emissions																0	0	0	0	0	0	0	0	0	0	0	0	0	0	0	0	0	0	0	0	0	0
benzo[k]fluoranthene	Benzo(k)fluoranthene		emissions to water	emissions to water, unspecified	4d9a8790-3ddd-11dd-94a7-0050c2490048	0	kg	Not applicable	Not applicable	Not applicable	Not applicable																	0	0	0	0	0	0	0	0	0	0	0	0	0	0	0	0	0	0	0	0	0	0
benzo[k]fluoranthene	Benzo(k)fluoranthene		emissions to soil	emissions to soil, unspecified	4d9a8790-3ddd-11dd-94a0-0050c2490048	0	kg	Not applicable	Not applicable	Not applicable	Not applicable																	0	0	0	0	0	0	0	0	0	0	0	0	0	0	0	0	0	0	0	0	0	0
benzo[k]fluoranthene	Benzo(k)fluoranthene	Industrial releases	emissions to water	emissions to water, unspecified	4d9a8790-3ddd-11dd-94a7-0050c2490048	6.723	kg	E-PRTR	EUROSTAT - economic data	Not applicable	Method D																	0	0	0	0	0	0	0	0	0	0	0	0	0	0	0	0	0	0	0	0	0	0
benzo[k]fluoranthene	Benzo(k)fluoranthene	Non-industrial releases	emissions to water	Emissions to water, unspecified	4d9a8790-3ddd-11dd-94a7-0050c2490048	508.187	kg	Waterbase	Eurostat - WWTP-connection stats	Not applicable	Method D2	Toxic waterborne emissions																0	0	0	0	0	0	0	0	0	0	0	0	0	0	0	0	0	0	0	0	0	0
benzo[k]fluoranthene	benzo(k) fluoranthene		emissions to air	emissions to air, unspecified	4d9a8790-3ddd-11dd-94a1-0050c2490048	81082.2	kg	EMEP	E-PRTR	Not applicable	Method C	Toxic airborne emissions																0	0	0	0	0	0	0	0	0	0	0	0	0	0	0	0	0	0	0	0	0	0
benzonitrile	Benzonitrile		emissions to air	emissions to air, unspecified	adf023c7-63ce-42f1-a34b-a8edb768d562	2.07286e+06	kg	EMEP	E-PRTR	Literature	Method A	NMVOC breakdown estimates													2.81974			0	0	0	0	0	0	0	0	0	0	0	0	5.84493e+06	0	0	0	0	0	0	0	0	0
benzoximate	Benzoximate	Pesticides (surface water)	Emissions to water	Emissions to water, unspecified	b9f5a3ce-270e-4ee1-bbe1-926337692c7b	31.4782	kg	FAOstat - Pesticide usage data	Eurostat - harvested areas	Eurostat - organic farming areas	Method F														3384.54			0	0	0	0	0	0	0	0	0	0	0	0	106539	0	0	0	0	0	0	0	0	0
benzoximate	Benzoximate	Pesticides (air)	Emissions to air	Emissions to air, unspecified	ca9b7a09-f926-4632-9e5b-09565d8cc438	472.174	kg	FAOstat - Pesticide usage data	Eurostat - harvested areas	Literature	Method F														34.4352			0	0	0	0	0	0	0	0	0	0	0	0	16259.4	0	0	0	0	0	0	0	0	0
benzoximate	Benzoximate	Pesticides (soil)	Emissions to soil	Emissions to soil, unspecified	f8626e35-1f50-4a7e-921f-c06f07906910	629.565	kg	FAOstat - Pesticide usage data	Eurostat - harvested areas	Eurostat - organic farming areas	Method F														6.38055			0	0	0	0	0	0	0	0	0	0	0	0	4016.97	0	0	0	0	0	0	0	0	0
benzthiazuron	Benzthiazuron	Pesticides (surface water)	Emissions to water	Emissions to water, unspecified	41934fda-2252-4494-b282-9fe64d271521	577.103	kg	Literature	Eurostat - harvested areas	Not applicable	Method F	Pesticides													49.2312			0	0	0	0	0	0	0	0	0	0	0	0	28411.5	0	0	0	0	0	0	0	0	0
benzthiazuron	Benzthiazuron	Pesticides (air)	Emissions to air	Emissions to air, unspecified	bc19536c-4791-44c1-8f7e-6be77c1f97b6	8656.55	kg	FAOstat - Pesticide usage data	Eurostat - harvested areas	Literature	Method F	Pesticides													0.555957			0	0	0	0	0	0	0	0	0	0	0	0	4812.67	0	0	0	0	0	0	0	0	0
benzthiazuron	Benzthiazuron	Pesticides (soil)	Emissions to soil	Emissions to soil, unspecified	af5999ae-b84b-4dd1-bcc8-7c805dcc9f4c	39721.1	kg	FAOstat - Pesticide usage data	Eurostat - harvested areas	Literature	Method F	Pesticides													1.11047			0	0	0	0	0	0	0	0	0	0	0	0	44108.9	0	0	0	0	0	0	0	0	0
benzyl alcohol	benzylalcohol		emissions to air	emissions to air, unspecified	7ea835e5-72ec-46e3-b1cb-88174d570ffa	1.66787e+06	kg	EMEP	E-PRTR	Literature	Method A	NMVOC breakdown estimates													7.23737			0	0	0	0	0	0	0	0	0	0	0	0	1.2071e+07	0	0	0	0	0	0	0	0	0
Beryllium	Be		emissions to air	emissions to air, unspecified	4d9a8790-3ddd-11dd-9d8b-0050c2490048	0	kg	Not applicable	Not applicable	Not applicable	Not applicable				6.35054e-05	0.0470531									1621.99			0	0	0	0	0	0	0	0	0	0	0	0	0	0	0	0	0	0	0	0	0	0
beryllium	beryllium		emissions to water	emissions to water, unspecified	fe0acd60-3ddc-11dd-a791-0050c2490048	0	kg	Not applicable	Not applicable	Not applicable	Not applicable				1.93229e-25	4.44322e-06									3719.35			0	0	0	0	0	0	0	0	0	0	0	0	0	0	0	0	0	0	0	0	0	0
beryllium	beryllium		emissions to soil	emissions to soil, unspecified	4d9a8790-3ddd-11dd-9d8a-0050c2490048	0	kg	Not applicable	Not applicable	Not applicable	Not applicable				2.13042e-24	2.44233e-06									2044.44			0	0	0	0	0	0	0	0	0	0	0	0	0	0	0	0	0	0	0	0	0	0
beryllium	Beryllium	metal content - not mined in EU27	resource flows	Non-renewable element resources from ground	fe0acd60-3ddc-11dd-a794-0050c2490048	0	kg	British Geological Survey	Not applicable	Not applicable	Method K3																3.95	0	0	0	0	0	0	0	0	0	0	0	0	0	0	0	0	0	0	0	0	0	0
bifenox	Bifenox	Pesticides (surface water)	Emissions to water	Emissions to water, unspecified	08a91e70-3ddc-11dd-9d2e-0050c2490048	519.524	kg	FAOstat - Pesticide usage data	Eurostat - harvested areas	Eurostat - organic farming areas	Method F														221278			0	0	0	0	0	0	0	0	0	0	0	0	1.14959e+08	0	0	0	0	0	0	0	0	0
bifenox	Bifenox	Pesticides (air)	Emissions to air	Emissions to air, unspecified	08a91e70-3ddc-11dd-9d28-0050c2490048	7792.86	kg	FAOstat - Pesticide usage data	Eurostat - harvested areas	Literature	Method F														8375.15			0	0	0	0	0	0	0	0	0	0	0	0	6.52664e+07	0	0	0	0	0	0	0	0	0
bifenox	Bifenox	Pesticides (soil)	Emissions to soil	Emissions to soil, unspecified	08a91e70-3ddc-11dd-9d27-0050c2490048	38428.7	kg	FAOstat - Pesticide usage data	Eurostat - harvested areas	Eurostat - organic farming areas	Method F														740.723			0	0	0	0	0	0	0	0	0	0	0	0	2.8465e+07	0	0	0	0	0	0	0	0	0
bifenthrin	Bifenthrin	Pesticides (surface water)	Emissions to water	Emissions to water, unspecified	4d9a8790-3ddd-11dd-94bd-0050c2490048	72.9715	kg	Literature	Eurostat - harvested areas	Not applicable	Method F	Pesticides				0.000138774									6.60622e+06			0	0	0	0.0101266	0	0	0	0	0	0	0	0	4.82066e+08	0	0	0	0	0	3.76597e-08	0	0	0
bifenthrin	Bifenthrin	Pesticides (air)	Emissions to air	Emissions to air, unspecified	4d9a8790-3ddd-11dd-94b7-0050c2490048	1094.57	kg	FAOstat - Pesticide usage data	Eurostat - harvested areas	Literature	Method F	Pesticides				6.60308e-06									104301			0	0	0	0.00722755	0	0	0	0	0	0	0	0	1.14165e+08	0	0	0	0	0	2.68785e-08	0	0	0
bifenthrin	Bifenthrin	Pesticides (soil)	Emissions to soil	Emissions to soil, unspecified	4d9a8790-3ddd-11dd-94b6-0050c2490048	1459.43	kg	FAOstat - Pesticide usage data	Eurostat - harvested areas	Literature	Method F	Pesticides				1.27503e-07									5733.53			0	0	0	0.000186082	0	0	0	0	0	0	0	0	8.36768e+06	0	0	0	0	0	6.92019e-10	0	0	0
bioresmethrin	Bioresmethrin	Pesticides (surface water)	Emissions to water	Emissions to water, unspecified	5e350c7f-d695-425f-8bf5-a144fa88e161	72.9715	kg	Literature	Eurostat - harvested areas	Not applicable	Method F	Pesticides				2.35628e-06									1.4761e+06			0	0	0	0.000171941	0	0	0	0	0	0	0	0	1.07713e+08	0	0	0	0	0	6.39432e-10	0	0	0
bioresmethrin	Bioresmethrin	Pesticides (air)	Emissions to air	Emissions to air, unspecified	486bb278-7998-4ebd-b5f1-0a801995f516	1094.57	kg	FAOstat - Pesticide usage data	Eurostat - harvested areas	Literature	Method F	Pesticides				3.73008e-07									10208.3			0	0	0	0.000408284	0	0	0	0	0	0	0	0	1.11737e+07	0	0	0	0	0	1.51837e-09	0	0	0
bioresmethrin	Bioresmethrin	Pesticides (soil)	Emissions to soil	Emissions to soil, unspecified	8521916f-64c1-4bd4-9487-febd661d657f	1459.43	kg	FAOstat - Pesticide usage data	Eurostat - harvested areas	Literature	Method F	Pesticides				6.92925e-10									425.749			0	0	0	1.01128e-06	0	0	0	0	0	0	0	0	621351	0	0	0	0	0	3.76083e-12	0	0	0
bis(tris(2-methyl-2-phenylpropyl)tin) oxide	Fenbutatin-oxide	Pesticides (surface water)	Emissions to water	Emissions to water, unspecified	fa1b69e4-af1a-4fb3-829d-7305c32ab6c0	237.283	kg	FAOstat - Pesticide usage data	Eurostat - harvested areas	Eurostat - organic farming areas	Method F					2.12403e-07									2.72839e-05			0	0	0	5.03997e-05	0	0	0	0	0	0	0	0	0.00647401	0	0	0	0	0	1.87431e-10	0	0	0
bis(tris(2-methyl-2-phenylpropyl)tin) oxide	Fenbutatin-oxide	Pesticides (air)	Emissions to air	Emissions to air, unspecified	f3c13f71-aac2-45f2-9d52-b61867b17d44	3559.25	kg	FAOstat - Pesticide usage data	Eurostat - harvested areas	Literature	Method F					1.19735e-05									8.44374e-07			0	0	0	0.0426168	0	0	0	0	0	0	0	0	0.00300534	0	0	0	0	0	1.58488e-07	0	0	0
bis(tris(2-methyl-2-phenylpropyl)tin) oxide	Fenbutatin-oxide	Pesticides (soil)	Emissions to soil	Emissions to soil, unspecified	601c0548-96d3-40e9-8117-5b178334de1a	4745.67	kg	FAOstat - Pesticide usage data	Eurostat - harvested areas	Eurostat - organic farming areas	Method F					9.06319e-11									1.1642e-08			0	0	0	4.30109e-07	0	0	0	0	0	0	0	0	5.52488e-05	0	0	0	0	0	1.59953e-12	0	0	0
bismuth	Bismuth ores - metal content	metal content	resource flows	Non-renewable element resources from ground	08a91e70-3ddc-11dd-a0f6-0050c2490048	85000	kg	British Geological Survey	Not applicable	Not applicable	Method K3																4.49	0	0	0	0	0	0	0	0	0	0	0	0	0	0	381650	0	0	0	0	0	0	0
bromacil	Bromacil	Pesticides (surface water)	Emissions to water	Emissions to water, unspecified	fe0acd60-3ddc-11dd-b182-0050c2490048	461.889	kg	FAOstat - Pesticide usage data	Eurostat - harvested areas	Eurostat - organic farming areas	Method F														3911.93			0	0	0	0	0	0	0	0	0	0	0	0	1.80688e+06	0	0	0	0	0	0	0	0	0
bromacil	Bromacil	Pesticides (air)	Emissions to air	Emissions to air, unspecified	fe0acd60-3ddc-11dd-b17c-0050c2490048	6928.34	kg	FAOstat - Pesticide usage data	Eurostat - harvested areas	Literature	Method F														303.238			0	0	0	0	0	0	0	0	0	0	0	0	2.10093e+06	0	0	0	0	0	0	0	0	0
bromacil	Bromacil	Pesticides (soil)	Emissions to soil	Emissions to soil, unspecified	fe0acd60-3ddc-11dd-b17b-0050c2490048	26605.2	kg	FAOstat - Pesticide usage data	Eurostat - harvested areas	Eurostat - organic farming areas	Method F														893.126			0	0	0	0	0	0	0	0	0	0	0	0	2.37618e+07	0	0	0	0	0	0	0	0	0
bromofenoxim	Bromofenoxim	Pesticides (surface water)	Emissions to water	Emissions to water, unspecified	93c49fa1-21a5-42ab-9883-df6244bd6904	3601.79	kg	Literature	Eurostat - harvested areas	Not applicable	Method F	Pesticides													22089.6			0	0	0	0	0	0	0	0	0	0	0	0	7.9562e+07	0	0	0	0	0	0	0	0	0
bromofenoxim	Bromofenoxim	Pesticides (air)	Emissions to air	Emissions to air, unspecified	32f985ed-64dd-414c-8694-feae630c1d0d	54026.8	kg	FAOstat - Pesticide usage data	Eurostat - harvested areas	Literature	Method F	Pesticides													683.583			0	0	0	0	0	0	0	0	0	0	0	0	3.69318e+07	0	0	0	0	0	0	0	0	0
bromofenoxim	Bromofenoxim	Pesticides (soil)	Emissions to soil	Emissions to soil, unspecified	ea10b561-7d0c-49e4-b0fa-a6d64380a32b	255803	kg	FAOstat - Pesticide usage data	Eurostat - harvested areas	Literature	Method F	Pesticides													17.6182			0	0	0	0	0	0	0	0	0	0	0	0	4.50679e+06	0	0	0	0	0	0	0	0	0
bromopropylate	Bromopropylate	Pesticides (surface water)	Emissions to water	Emissions to water, unspecified	12c474e1-4471-47dc-ab66-fad72618a537	31.4782	kg	FAOstat - Pesticide usage data	Eurostat - harvested areas	Eurostat - organic farming areas	Method F					1.41076e-05									38808.1			0	0	0	0.000444084	0	0	0	0	0	0	0	0	1.22161e+06	0	0	0	0	0	1.6515e-09	0	0	0
bromopropylate	Bromopropylate	Pesticides (air)	Emissions to air	Emissions to air, unspecified	892142ba-4205-42fb-8d5a-73a784b1b6ce	472.174	kg	FAOstat - Pesticide usage data	Eurostat - harvested areas	Literature	Method F					1.93519e-06									982.225			0	0	0	0.000913746	0	0	0	0	0	0	0	0	463781	0	0	0	0	0	3.39813e-09	0	0	0
bromopropylate	Bromopropylate	Pesticides (soil)	Emissions to soil	Emissions to soil, unspecified	8e93780e-11e9-40b1-b888-b257db107102	629.565	kg	FAOstat - Pesticide usage data	Eurostat - harvested areas	Eurostat - organic farming areas	Method F					2.17434e-07									519.917			0	0	0	0.000136889	0	0	0	0	0	0	0	0	327321	0	0	0	0	0	5.09076e-10	0	0	0
bromoxynil	Bromoxynil	Pesticides (surface water)	Emissions to water	Emissions to water, unspecified	fe0acd60-3ddc-11dd-b0a6-0050c2490048	1425.88	kg	Literature	Eurostat - harvested areas	Not applicable	Method F	Pesticides				3.53269e-06									16426.4			0	0	0	0.00503718	0	0	0	0	0	0	0	0	2.3422e+07	0	0	0	0	0	1.87327e-08	0	0	0
bromoxynil	Bromoxynil	Pesticides (air)	Emissions to air	Emissions to air, unspecified	fe0acd60-3ddc-11dd-b0a0-0050c2490048	21388.1	kg	FAOstat - Pesticide usage data	Eurostat - harvested areas	Literature	Method F	Pesticides				1.8553e-06									1255.04			0	0	0	0.0396815	0	0	0	0	0	0	0	0	2.68429e+07	0	0	0	0	0	1.47571e-07	0	0	0
bromoxynil	Bromoxynil	Pesticides (soil)	Emissions to soil	Emissions to soil, unspecified	fe0acd60-3ddc-11dd-b09f-0050c2490048	105515	kg	FAOstat - Pesticide usage data	Eurostat - harvested areas	Literature	Method F	Pesticides				1.86936e-07									869.048			0	0	0	0.0197245	0	0	0	0	0	0	0	0	9.16974e+07	0	0	0	0	0	7.33533e-08	0	0	0
bromuconazole	Bromuconazole	Pesticides (surface water)	Emissions to water	Emissions to water, unspecified	fe0acd60-3ddc-11dd-b1aa-0050c2490048	1480.68	kg	Literature	Eurostat - harvested areas	Not applicable	Method F	Pesticides													99392			0	0	0	0	0	0	0	0	0	0	0	0	1.47167e+08	0	0	0	0	0	0	0	0	0
bromuconazole	Bromuconazole	Pesticides (air)	Emissions to air	Emissions to air, unspecified	fe0acd60-3ddc-11dd-b1a4-0050c2490048	22210.1	kg	FAOstat - Pesticide usage data	Eurostat - harvested areas	Literature	Method F	Pesticides													2857.34			0	0	0	0	0	0	0	0	0	0	0	0	6.3462e+07	0	0	0	0	0	0	0	0	0
bromuconazole	Bromuconazole	Pesticides (soil)	Emissions to soil	Emissions to soil, unspecified	fe0acd60-3ddc-11dd-b1a3-0050c2490048	29613.5	kg	FAOstat - Pesticide usage data	Eurostat - harvested areas	Literature	Method F	Pesticides													946.627			0	0	0	0	0	0	0	0	0	0	0	0	2.8033e+07	0	0	0	0	0	0	0	0	0
brown coal; 11.9 MJ/kg	Brown coal [MJ]	energy equivalent	resource flows	Non-renewable energy resources from ground	fe0acd60-3ddc-11dd-a6f9-0050c2490048	3639600000000	MJ	Eurostat - Energy	Not applicable	Not applicable	Method K2																7.79e-09	0	0	0	0	0	0	0	0	0	0	0	0	0	0	28352.5	0	0	0	0	0	0	0
BTEX	BTEX	not an ILCD flow	Emissions to water	Emissions to water, unspecified* average among ILCD flows	not an ILCD flow	152469	kg								6.14111e-08	1.98018e-08									259.049			0	0	0.00936327	0.00301915	0	0	0	0	0	0	0	0	3.94968e+07	0	0	0	0	4.98634e-07	1.12279e-08	0	0	0
buprofezin	Buprofezin	Pesticides (surface water)	Emissions to water	Emissions to water, unspecified	bb3827cb-c29d-428e-a145-de2c4a18636c	19.152	kg	FAOstat - Pesticide usage data	Eurostat - harvested areas	Eurostat - organic farming areas	Method F					1.05313e-05									810.035			0	0	0	0.000201695	0	0	0	0	0	0	0	0	15513.8	0	0	0	0	0	7.50084e-10	0	0	0
buprofezin	Buprofezin	Pesticides (air)	Emissions to air	Emissions to air, unspecified	0cd8e243-892a-4bfb-90c3-b145b044f766	287.28	kg	FAOstat - Pesticide usage data	Eurostat - harvested areas	Literature	Method F					2.66955e-06									3.4448			0	0	0	0.000766909	0	0	0	0	0	0	0	0	989.621	0	0	0	0	0	2.85205e-09	0	0	0
buprofezin	Buprofezin	Pesticides (soil)	Emissions to soil	Emissions to soil, unspecified	021c2d46-60cc-4da9-8b8b-7dbbb59defba	383.04	kg	FAOstat - Pesticide usage data	Eurostat - harvested areas	Eurostat - organic farming areas	Method F					1.21282e-07									4.53043			0	0	0	4.6456e-05	0	0	0	0	0	0	0	0	1735.34	0	0	0	0	0	1.72765e-10	0	0	0
butadiene	butadiene		emissions to water	emissions to water, unspecified	4d9a8790-3ddd-11dd-98ee-0050c2490048	0	kg	Not applicable	Not applicable	Not applicable	Not applicable				4.62445e-07	6.92025e-07												0	0	0	0	0	0	0	0	0	0	0	0	0	0	0	0	0	0	0	0	0	0
butadiene	butadiene		emissions to soil	emissions to soil, unspecified	4d9a8790-3ddd-11dd-98e6-0050c2490048	0	kg	Not applicable	Not applicable	Not applicable	Not applicable				1.83886e-08	2.75176e-08												0	0	0	0	0	0	0	0	0	0	0	0	0	0	0	0	0	0	0	0	0	0
butadiene	butadiene		emissions to air	emissions to air, unspecified	4d9a8790-3ddd-11dd-98e7-0050c2490048	5.46918e+06	kg	EMEP	E-PRTR	Literature	Method A	NMVOC breakdown estimates			5.71274e-07	8.54881e-07			1.44									0	0	3.1244	4.6755	0	0	7.87562e+06	0	0	0	0	0	0	0	0	0	0	0.000166388	1.73877e-05	0	0	0.000498241
butocarboxim	Butocarboxim	Pesticides (surface water)	Emissions to water	Emissions to water, unspecified	b2aced00-ac3f-4f99-8bbf-67591c5c58c6	425.418	kg	FAOstat - Pesticide usage data	Eurostat - harvested areas	Eurostat - organic farming areas	Method F														894.858			0	0	0	0	0	0	0	0	0	0	0	0	380688	0	0	0	0	0	0	0	0	0
butocarboxim	Butocarboxim	Pesticides (air)	Emissions to air	Emissions to air, unspecified	629fdf1f-1013-4dfd-a6b1-be2980e043ac	6381.26	kg	FAOstat - Pesticide usage data	Eurostat - harvested areas	Literature	Method F														44.516			0	0	0	0	0	0	0	0	0	0	0	0	284069	0	0	0	0	0	0	0	0	0
butocarboxim	Butocarboxim	Pesticides (soil)	Emissions to soil	Emissions to soil, unspecified	8f090dc3-6f59-4fde-bc70-ab0a7f11a62e	8508.35	kg	FAOstat - Pesticide usage data	Eurostat - harvested areas	Eurostat - organic farming areas	Method F														139.083			0	0	0	0	0	0	0	0	0	0	0	0	1.18337e+06	0	0	0	0	0	0	0	0	0
butralin	Butralin	Pesticides (surface water)	Emissions to water	Emissions to water, unspecified	fe0acd60-3ddc-11dd-b1b8-0050c2490048	1815.73	kg	Literature	Eurostat - harvested areas	Not applicable	Method F	Pesticides													196047			0	0	0	0	0	0	0	0	0	0	0	0	3.55969e+08	0	0	0	0	0	0	0	0	0
butralin	Butralin	Pesticides (air)	Emissions to air	Emissions to air, unspecified	fe0acd60-3ddc-11dd-b1b2-0050c2490048	27236	kg	FAOstat - Pesticide usage data	Eurostat - harvested areas	Literature	Method F	Pesticides													1409.29			0	0	0	0	0	0	0	0	0	0	0	0	3.83834e+07	0	0	0	0	0	0	0	0	0
butralin	Butralin	Pesticides (soil)	Emissions to soil	Emissions to soil, unspecified	fe0acd60-3ddc-11dd-b1b1-0050c2490048	133163	kg	FAOstat - Pesticide usage data	Eurostat - harvested areas	Literature	Method F	Pesticides													688.849			0	0	0	0	0	0	0	0	0	0	0	0	9.17295e+07	0	0	0	0	0	0	0	0	0
butylene glycol	butylene glycol		emissions to water	emissions to water, unspecified	fe0acd60-3ddc-11dd-a8ad-0050c2490048	0	kg	Not applicable	Not applicable	Not applicable	Not applicable														7.30933			0	0	0	0	0	0	0	0	0	0	0	0	0	0	0	0	0	0	0	0	0	0
butylene glycol	butylene glycol		emissions to soil	emissions to soil, unspecified	f214fc49-6555-11dd-ad8b-0800200c9a66	0	kg	Not applicable	Not applicable	Not applicable	Not applicable														1.88048			0	0	0	0	0	0	0	0	0	0	0	0	0	0	0	0	0	0	0	0	0	0
cadmium	Cadmium		emissions to water	emissions to water, unspecified	fe0acd60-3ddc-11dd-a292-0050c2490048	0	kg	Not applicable	Not applicable	Not applicable	Not applicable				1.59005e-06	0.000426599									9712.29			0	0	0	0	0	0	0	0	0	0	0	0	0	0	0	0	0	0	0	0	0	0
cadmium	Cadmium and compounds (as Cd)	Industrial releases	emissions to soil	emissions to soil, unspecified	08a91e70-3ddc-11dd-9673-0050c2490048	297	kg	E-PRTR	Not applicable	Not applicable	Not applicable				8.08107e-07	0.000216809									4936.05			0	0	0.000240008	0.0643923	0	0	0	0	0	0	0	0	1.46601e+06	0	0	0	0	1.27814e-08	2.39468e-07	0	0	0
cadmium	Cadmium	Non-industrial releases	emissions to water	emissions to water, unspecified	fe0acd60-3ddc-11dd-a292-0050c2490048	3223.25	kg	Waterbase	Eurostat - WWTP-connection stats	Not applicable	Method D2	Toxic waterborne emissions			1.59005e-06	0.000426599									9712.29			0	0	0.00512514	1.37504	0	0	0	0	0	0	0	0	3.13052e+07	0	0	0	0	2.72935e-07	5.11362e-06	0	0	0
cadmium	Cadmium	sludge	emissions to soil	emissions to soil, unspecified	08a91e70-3ddc-11dd-9673-0050c2490048	7234.42	kg	Eurostat - sewage sludge usage	Literature	Not applicable	Method E				8.08107e-07	0.000216809									4936.05			0	0	0.00584618	1.56849	0	0	0	0	0	0	0	0	3.57094e+07	0	0	0	0	3.11334e-07	5.83304e-06	0	0	0
cadmium	Cadmium and compounds (as Cd)	Industrial releases	emissions to water	emissions to water, unspecified	fe0acd60-3ddc-11dd-a292-0050c2490048	32130	kg	E-PRTR	EUROSTAT - economic data	Not applicable	Method D1	Toxic waterborne emissions			1.59005e-06	0.000426599									9712.29			0	0	0.0510884	13.7067	0	0	0	0	0	0	0	0	3.12056e+08	0	0	0	0	2.72067e-06	5.09736e-05	0	0	0
Cadmium	Cd		emissions to air	emissions to air, unspecified	08a91e70-3ddc-11dd-9674-0050c2490048	101229	kg	EMEP	E-PRTR	Not applicable	Method C	Toxic airborne emissions			0.000216825	0.0454814									3938.52			0	0	21.949	4604.04	0	0	0	0	0	0	0	0	3.98693e+08	0	0	0	0	0.00116888	0.0171219	0	0	0
cadmium	Cadmium	manure	emissions to soil	emissions to soil, unspecified	08a91e70-3ddc-11dd-9673-0050c2490048	105858	kg	FAOstat - manure application	Literature	Not applicable	Method E				8.08107e-07	0.000216809									4936.05			0	0	0.085545	22.9511	0	0	0	0	0	0	0	0	5.22522e+08	0	0	0	0	4.55563e-06	8.53527e-05	0	0	0
cadmium	Cadmium	metal content	resource flows	Non-renewable element resources from ground	fe0acd60-3ddc-11dd-a295-0050c2490048	751000	kg	British Geological Survey	Not applicable	Not applicable	Method K3																1.11	0	0	0	0	0	0	0	0	0	0	0	0	0	0	833610	0	0	0	0	0	0	0
caprolactam	caprolactam		emissions to water	emissions to water, unspecified	fe0acd60-3ddc-11dd-aff5-0050c2490048	0	kg	Not applicable	Not applicable	Not applicable	Not applicable					9.96107e-08									19.35			0	0	0	0	0	0	0	0	0	0	0	0	0	0	0	0	0	0	0	0	0	0
caprolactam	caprolactam		emissions to soil	emissions to soil, unspecified	fe0acd60-3ddc-11dd-aff2-0050c2490048	0	kg	Not applicable	Not applicable	Not applicable	Not applicable					1.6516e-08									3.20721			0	0	0	0	0	0	0	0	0	0	0	0	0	0	0	0	0	0	0	0	0	0
captan	Captan	Pesticides (surface water)	Emissions to water	Emissions to water, unspecified	fe0acd60-3ddc-11dd-aa6b-0050c2490048	4123.75	kg	FAOstat - Pesticide usage data	Eurostat - harvested areas	Eurostat - organic farming areas	Method F				2.01306e-07	2.1157e-06									85133.1			0	0	0.000830137	0.00872462	0	0	0	0	0	0	0	0	3.51068e+08	0	0	0	0	4.42083e-08	3.24459e-08	0	0	0
captan	Captan	Pesticides (air)	Emissions to air	Emissions to air, unspecified	fe0acd60-3ddc-11dd-aa65-0050c2490048	61856.3	kg	FAOstat - Pesticide usage data	Eurostat - harvested areas	Literature	Method F				2.09006e-08	2.19662e-07									1832			0	0	0.00129283	0.0135875	0	0	0	0	0	0	0	0	1.13321e+08	0	0	0	0	6.88488e-08	5.05304e-08	0	0	0
captan	Captan	Pesticides (soil)	Emissions to soil	Emissions to soil, unspecified	fe0acd60-3ddc-11dd-aa64-0050c2490048	82475	kg	FAOstat - Pesticide usage data	Eurostat - harvested areas	Eurostat - organic farming areas	Method F				2.36951e-08	2.49032e-07									10008.3			0	0	0.00195425	0.0205389	0	0	0	0	0	0	0	0	8.25438e+08	0	0	0	0	1.04072e-07	7.63821e-08	0	0	0
carbaryl	Carbaryl	Pesticides (surface water)	Emissions to water	Emissions to water, unspecified	fe0acd60-3ddc-11dd-a80f-0050c2490048	425.418	kg	FAOstat - Pesticide usage data	Eurostat - harvested areas	Eurostat - organic farming areas	Method F				7.09198e-06	5.25677e-06									45969.8			0	0	0.00301705	0.00223632	0	0	0	0	0	0	0	0	1.95564e+07	0	0	0	0	1.60671e-07	8.31664e-09	0	0	0
carbaryl	Carbaryl	Pesticides (air)	Emissions to air	Emissions to air, unspecified	fe0acd60-3ddc-11dd-a809-0050c2490048	6381.26	kg	FAOstat - Pesticide usage data	Eurostat - harvested areas	Literature	Method F				2.43884e-06	1.80773e-06									1392.89			0	0	0.0155629	0.0115356	0	0	0	0	0	0	0	0	8.88842e+06	0	0	0	0	8.28788e-07	4.28997e-08	0	0	0
carbaryl	Carbaryl	Pesticides (soil)	Emissions to soil	Emissions to soil, unspecified	fe0acd60-3ddc-11dd-a808-0050c2490048	8508.35	kg	FAOstat - Pesticide usage data	Eurostat - harvested areas	Eurostat - organic farming areas	Method F				4.75161e-07	3.52202e-07									3071.94			0	0	0.00404283	0.00299666	0	0	0	0	0	0	0	0	2.61372e+07	0	0	0	0	2.15298e-07	1.11442e-08	0	0	0
carbendazim	Carbendazim	Pesticides (surface water)	Emissions to water	Emissions to water, unspecified	4d9a8790-3ddd-11dd-989f-0050c2490048	2340.33	kg	Literature	Eurostat - harvested areas	Not applicable	Method F	Pesticides				1.50763e-06									741428			0	0	0	0.00352836	0	0	0	0	0	0	0	0	1.73519e+09	0	0	0	0	0	1.31216e-08	0	0	0
carbendazim	Carbendazim	Pesticides (air)	Emissions to air	Emissions to air, unspecified	4d9a8790-3ddd-11dd-9899-0050c2490048	35104.9	kg	FAOstat - Pesticide usage data	Eurostat - harvested areas	Literature	Method F	Pesticides				1.92242e-07									10852.6			0	0	0	0.00674866	0	0	0	0	0	0	0	0	3.80979e+08	0	0	0	0	0	2.50975e-08	0	0	0
carbendazim	Carbendazim	Pesticides (soil)	Emissions to soil	Emissions to soil, unspecified	4d9a8790-3ddd-11dd-9898-0050c2490048	46806.6	kg	FAOstat - Pesticide usage data	Eurostat - harvested areas	Literature	Method F	Pesticides				1.10932e-07									54554.1			0	0	0	0.00519234	0	0	0	0	0	0	0	0	2.55349e+09	0	0	0	0	0	1.93098e-08	0	0	0
carbetamide	carbetamide		emissions to water	emissions to water, unspecified	4d9a8790-3ddd-11dd-973e-0050c2490048	0	kg	Not applicable	Not applicable	Not applicable	Not applicable														2166.34			0	0	0	0	0	0	0	0	0	0	0	0	0	0	0	0	0	0	0	0	0	0
carbetamide	carbetamide		emissions to soil	emissions to soil, unspecified	08a91e70-3ddc-11dd-9237-0050c2490048	0	kg	Not applicable	Not applicable	Not applicable	Not applicable														243.104			0	0	0	0	0	0	0	0	0	0	0	0	0	0	0	0	0	0	0	0	0	0
carbofuran	Carbofuran	Pesticides (surface water)	Emissions to water	Emissions to water, unspecified	fe0acd60-3ddc-11dd-af51-0050c2490048	484.218	kg	FAOstat - Pesticide usage data	Eurostat - harvested areas	Eurostat - organic farming areas	Method F					3.73932e-05									112462			0	0	0	0.0181064	0	0	0	0	0	0	0	0	5.4456e+07	0	0	0	0	0	6.73359e-08	0	0	0
carbofuran	Carbofuran	Pesticides (air)	Emissions to air	Emissions to air, unspecified	08a91e70-3ddc-11dd-a309-0050c2490048	7263.26	kg	FAOstat - Pesticide usage data	Eurostat - harvested areas	Literature	Method F					1.39792e-05									6338.92			0	0	0	0.101534	0	0	0	0	0	0	0	0	4.60412e+07	0	0	0	0	0	3.77596e-07	0	0	0
carbofuran	Carbofuran	Pesticides (soil)	Emissions to soil	Emissions to soil, unspecified	08a91e70-3ddc-11dd-9239-0050c2490048	9684.35	kg	FAOstat - Pesticide usage data	Eurostat - harvested areas	Eurostat - organic farming areas	Method F					7.19424e-06									21581.8			0	0	0	0.0696715	0	0	0	0	0	0	0	0	2.09006e+08	0	0	0	0	0	2.59101e-07	0	0	0
carbon dioxide	CO2	only from LULUCF	emissions to air	emissions to air, unspecified	fe0acd60-3ddc-11dd-af54-0050c2490048	-2.96494e+11	kg	UNFCCC GHG	Not applicable	Not applicable	Method S1		1															-2.96494e+11	0	0	0	0	0	0	0	0	0	0	0	0	0	0	-0.0644493	0	0	0	0	0	0
carbon dioxide	CO2	total excl LULUCF	emissions to air	emissions to air, unspecified	fe0acd60-3ddc-11dd-af54-0050c2490048	3.90068e+12	kg	UNFCCC GHG	Not applicable	Not applicable	Method S1		1															3.90068e+12	0	0	0	0	0	0	0	0	0	0	0	0	0	0	0.847896	0	0	0	0	0	0
carbon dioxide (biogenic)	CO2, from biomass burning		emissions to air	emissions to air, unspecified	08a91e70-3ddc-11dd-9c15-0050c2490048	6.04593e+09	kg	UNFCCC GHG	Not applicable	Not applicable	Method S1		1															6.04593e+09	0	0	0	0	0	0	0	0	0	0	0	0	0	0	0.00131421	0	0	0	0	0	0
carbon disulfide	carbon disulfide		emissions to water	emissions to water, unspecified	08a91e70-3ddc-11dd-924b-0050c2490048	0	kg	Not applicable	Not applicable	Not applicable	Not applicable					3.74933e-05									153.423			0	0	0	0	0	0	0	0	0	0	0	0	0	0	0	0	0	0	0	0	0	0
carbon disulfide	carbon disulfide		emissions to soil	emissions to soil, unspecified	08a91e70-3ddc-11dd-9244-0050c2490048	0	kg	Not applicable	Not applicable	Not applicable	Not applicable					4.23801e-05									4.82294			0	0	0	0	0	0	0	0	0	0	0	0	0	0	0	0	0	0	0	0	0	0
carbon monoxide	CO	total excl LULUCF	emissions to air	emissions to air, unspecified	08a91e70-3ddc-11dd-924e-0050c2490048	2.59047e+10	kg	UNFCCC GHG	Not applicable	Not applicable	Method T1, T2						0.000355556		0.0456									0	0	0	0	9.21058e+06	0	1.18126e+09	0	0	0	0	0	0	0	0	0	0	0	0	0.00491995	0	0.0747306
carbon-14	Carbon-14	from medical sector	emissions to water	Emissions to sea water	08a91e70-3ddc-11dd-9ded-0050c2490048	0	kBq	Not applicable	Not applicable	Not applicable	method N							0.0557										0	0	0	0	0	0	0	0	0	0	0	0	0	0	0	0	0	0	0	0	0	0
carbon-14	Carbon-14	from Phosphate industry	emissions to water	Emissions to sea water	08a91e70-3ddc-11dd-9ded-0050c2490048	0	kBq	Not applicable	Not applicable	Not applicable	method N							0.0557										0	0	0	0	0	0	0	0	0	0	0	0	0	0	0	0	0	0	0	0	0	0
carbon-14	Carbon-14	from Primary steel manufacture	emissions to water	Emissions to sea water	08a91e70-3ddc-11dd-9ded-0050c2490048	0	kBq	Not applicable	Not applicable	Not applicable	method N							0.0557										0	0	0	0	0	0	0	0	0	0	0	0	0	0	0	0	0	0	0	0	0	0
carbon-14	Carbon-14	from Rare Earth production	emissions to water	Emissions to sea water	08a91e70-3ddc-11dd-9ded-0050c2490048	0	kBq	Not applicable	Not applicable	Not applicable	method N							0.0557										0	0	0	0	0	0	0	0	0	0	0	0	0	0	0	0	0	0	0	0	0	0
carbon-14	Carbon-14	from the offshore oil and gas industry	emissions to water	Emissions to sea water	08a91e70-3ddc-11dd-9ded-0050c2490048	0	kBq	Not applicable	Not applicable	Not applicable	method N							0.0557										0	0	0	0	0	0	0	0	0	0	0	0	0	0	0	0	0	0	0	0	0	0
carbon-14	Carbon-14	from Titanium dioxide pigment manufacturers	emissions to water	Emissions to sea water	08a91e70-3ddc-11dd-9ded-0050c2490048	0	kBq	Not applicable	Not applicable	Not applicable	method N							0.0557										0	0	0	0	0	0	0	0	0	0	0	0	0	0	0	0	0	0	0	0	0	0
carbon-14	Carbon-14	from gypsum end-of-life	emissions to air	emissions to air, unspecified	08a91e70-3ddc-11dd-9257-0050c2490048	593015	kBq	Eurostat - Prodcom	ecoinvent 3	Not applicable	Method O	Ionizing radiation emissions from gypsum plaster and ceramics end of life						10										0	0	0	0	0	5.93015e+06	0	0	0	0	0	0	0	0	0	0	0	0	0	0	1.05104e-05	0
carbon-14	Carbon-14	from universities and research	emissions to water	Emissions to sea water	08a91e70-3ddc-11dd-9ded-0050c2490048	193681000	kBq	Not applicable	Not applicable	Not applicable	method N							0.0557										0	0	0	0	0	1.0788e+07	0	0	0	0	0	0	0	0	0	0	0	0	0	0	1.91204e-05	0
carbon-14	Carbon-14	from fuel reprocessing	emissions to water	emissions to water, unspecified	08a91e70-3ddc-11dd-925d-0050c2490048	1.16357e+10	kBq	Fissilematerials.org	UNSCEAR	Not applicable	Method M2	JRC - spent fuel reprocessing																0	0	0	0	0	0	0	0	0	0	0	0	0	0	0	0	0	0	0	0	0	0
carbon-14	Carbon-14	from fuel reprocessing	emissions to air	emissions to air, unspecified	08a91e70-3ddc-11dd-9257-0050c2490048	1.43255e+10	kBq	Fissilematerials.org	UNSCEAR	Not applicable	Method M2	JRC - spent fuel reprocessing						10										0	0	0	0	0	1.43255e+11	0	0	0	0	0	0	0	0	0	0	0	0	0	0	0.253901	0
carbon-14	Carbon-14	from electricity production	emissions to air	emissions to air, unspecified	08a91e70-3ddc-11dd-9257-0050c2490048	3.25716e+10	kBq	Eurostat - Energy	UNSCEAR	Not applicable	Method M1	Upscaling ionizing radiation from electricity production						10										0	0	0	0	0	3.25716e+11	0	0	0	0	0	0	0	0	0	0	0	0	0	0	0.577288	0
carbon-14	Carbon-14	from radiochemical production	emissions to water	Emissions to sea water	08a91e70-3ddc-11dd-9ded-0050c2490048	91516941000	kBq	Not applicable	Not applicable	Not applicable	method N							0.0557										0	0	0	0	0	5.09749e+09	0	0	0	0	0	0	0	0	0	0	0	0	0	0	0.00903463	0
carbophenothion	carbophenothion	Pesticides (surface water)	Emissions to water	Emissions to water, unspecified	34dba134-042d-4f43-bc50-8434efad799d	578.864	kg	Literature	Eurostat - harvested areas	Not applicable	Method F	Pesticides				0.00687624									242046			0	0	0	3.9804	0	0	0	0	0	0	0	0	1.40112e+08	0	0	0	0	0	1.48027e-05	0	0	0
carbophenothion	carbophenothion	Pesticides (air)	Emissions to air	Emissions to air, unspecified	3960cd41-dd8a-4ee1-a2eb-4a9c335d6af6	8682.96	kg	FAOstat - Pesticide usage data	Eurostat - harvested areas	Literature	Method F	Pesticides				7.01336e-05									1518.46			0	0	0	0.608967	0	0	0	0	0	0	0	0	1.31848e+07	0	0	0	0	0	2.26468e-06	0	0	0
carbophenothion	carbophenothion	Pesticides (soil)	Emissions to soil	Emissions to soil, unspecified	cf567353-d851-4f76-a192-94f136ae7b8d	11577.3	kg	FAOstat - Pesticide usage data	Eurostat - harvested areas	Literature	Method F	Pesticides				3.61447e-06									127.108			0	0	0	0.0418457	0	0	0	0	0	0	0	0	1.47157e+06	0	0	0	0	0	1.5562e-07	0	0	0
carboxin	Carboxin	Pesticides (surface water)	Emissions to water	Emissions to water, unspecified	4d9a8790-3ddd-11dd-9715-0050c2490048	66.655	kg	FAOstat - Pesticide usage data	Eurostat - harvested areas	Eurostat - organic farming areas	Method F					1.09122e-06									24676.4			0	0	0	7.27353e-05	0	0	0	0	0	0	0	0	1.6448e+06	0	0	0	0	0	2.70495e-10	0	0	0
carboxin	Carboxin	Pesticides (air)	Emissions to air	Emissions to air, unspecified	4d9a8790-3ddd-11dd-975f-0050c2490048	999.825	kg	FAOstat - Pesticide usage data	Eurostat - harvested areas	Literature	Method F					1.6947e-07									382.265			0	0	0	0.00016944	0	0	0	0	0	0	0	0	382198	0	0	0	0	0	6.30129e-10	0	0	0
carboxin	Carboxin	Pesticides (soil)	Emissions to soil	Emissions to soil, unspecified	4d9a8790-3ddd-11dd-975e-0050c2490048	1333.1	kg	FAOstat - Pesticide usage data	Eurostat - harvested areas	Eurostat - organic farming areas	Method F					7.1561e-08									1618.14			0	0	0	9.5398e-05	0	0	0	0	0	0	0	0	2.15714e+06	0	0	0	0	0	3.54775e-10	0	0	0
cerium-141	Cerium-141	from gypsum end-of-life	emissions to air	emissions to air, unspecified	08a91e70-3ddc-11dd-9260-0050c2490048	0.781288	kBq	Eurostat - Prodcom	ecoinvent 3	Not applicable	Method O	Ionizing radiation emissions from gypsum plaster and ceramics end of life																0	0	0	0	0	0	0	0	0	0	0	0	0	0	0	0	0	0	0	0	0	0
cerium-141	Cerium-141	from gypsum end-of-life	emissions to water	emissions to water, unspecified	4d9a8790-3ddd-11dd-9b23-0050c2490048	3.43401	kBq	Eurostat - Prodcom	Not applicable	Not applicable	Method O	Ionizing radiation emissions from gypsum plaster and ceramics end of life																0	0	0	0	0	0	0	0	0	0	0	0	0	0	0	0	0	0	0	0	0	0
cerium-141	Cerium-141	from electricity production	emissions to air	emissions to air, unspecified	08a91e70-3ddc-11dd-9260-0050c2490048	32887.5	kBq	Eurostat - Energy	ecoinvent 3	UNSCEAR	Method M1	Upscaling ionizing radiation from electricity production																0	0	0	0	0	0	0	0	0	0	0	0	0	0	0	0	0	0	0	0	0	0
cerium-141	Cerium-141	from electricity production	emissions to water	emissions to water, unspecified	4d9a8790-3ddd-11dd-9b23-0050c2490048	168600	kBq	Eurostat - Energy	ecoinvent 3	UNSCEAR	Method M1	Upscaling ionizing radiation from electricity production																0	0	0	0	0	0	0	0	0	0	0	0	0	0	0	0	0	0	0	0	0	0
cerium-144	Cerium-144	from gypsum end-of-life	emissions to water	emissions to water, unspecified	4d9a8790-3ddd-11dd-9b26-0050c2490048	1.24438	kBq	Eurostat - Prodcom	Not applicable	Not applicable	Method O	Ionizing radiation emissions from gypsum plaster and ceramics end of life																0	0	0	0	0	0	0	0	0	0	0	0	0	0	0	0	0	0	0	0	0	0
cerium-144	Cerium-144	from electricity production	emissions to water	emissions to water, unspecified	4d9a8790-3ddd-11dd-9b26-0050c2490048	118241	kBq	Eurostat - Energy	ecoinvent 3	UNSCEAR	Method M1	Upscaling ionizing radiation from electricity production																0	0	0	0	0	0	0	0	0	0	0	0	0	0	0	0	0	0	0	0	0	0
cesium-134	Cesium-134	from gypsum end-of-life	emissions to air	emissions to air, unspecified	4d9a8790-3ddd-11dd-9b2c-0050c2490048	0.0374187	kBq	Eurostat - Prodcom	ecoinvent 3	Not applicable	Method O	Ionizing radiation emissions from gypsum plaster and ceramics end of life						0.564										0	0	0	0	0	0.0211041	0	0	0	0	0	0	0	0	0	0	0	0	0	0	3.74043e-14	0
cesium-134	Cesium-134	from gypsum end-of-life	emissions to water	emissions to water, unspecified	4d9a8790-3ddd-11dd-9b32-0050c2490048	41.4554	kBq	Eurostat - Prodcom	Not applicable	Not applicable	Method O	Ionizing radiation emissions from gypsum plaster and ceramics end of life						6.79										0	0	0	0	0	281.482	0	0	0	0	0	0	0	0	0	0	0	0	0	0	4.9889e-10	0
cesium-134	Cesium-134	from electricity production	emissions to air	emissions to air, unspecified	4d9a8790-3ddd-11dd-9b2c-0050c2490048	1575.1	kBq	Eurostat - Energy	ecoinvent 3	UNSCEAR	Method M1	Upscaling ionizing radiation from electricity production						0.564										0	0	0	0	0	888.355	0	0	0	0	0	0	0	0	0	0	0	0	0	0	1.57449e-09	0
cesium-134	Cesium-134	from electricity production	emissions to water	emissions to water, unspecified	4d9a8790-3ddd-11dd-9b32-0050c2490048	4.87343e+06	kBq	Eurostat - Energy	ecoinvent 3	UNSCEAR	Method M1	Upscaling ionizing radiation from electricity production						6.79										0	0	0	0	0	3.30906e+07	0	0	0	0	0	0	0	0	0	0	0	0	0	0	5.86487e-05	0
cesium-136	Cesium-136	from gypsum end-of-life	emissions to water	emissions to water, unspecified	4d9a8790-3ddd-11dd-9b36-0050c2490048	0.725459	kBq	Eurostat - Prodcom	Not applicable	Not applicable	Method O	Ionizing radiation emissions from gypsum plaster and ceramics end of life																0	0	0	0	0	0	0	0	0	0	0	0	0	0	0	0	0	0	0	0	0	0
cesium-136	Cesium-136	from electricity production	emissions to water	emissions to water, unspecified	4d9a8790-3ddd-11dd-9b36-0050c2490048	68933.1	kBq	Eurostat - Energy	ecoinvent 3	UNSCEAR	Method M1	Upscaling ionizing radiation from electricity production																0	0	0	0	0	0	0	0	0	0	0	0	0	0	0	0	0	0	0	0	0	0
cesium-137	Cesium-137	from gypsum end-of-life	emissions to air	emissions to air, unspecified	4d9a8790-3ddd-11dd-9b37-0050c2490048	0.666692	kBq	Eurostat - Prodcom	ecoinvent 3	Not applicable	Method O	Ionizing radiation emissions from gypsum plaster and ceramics end of life						0.636										0	0	0	0	0	0.424016	0	0	0	0	0	0	0	0	0	0	0	0	0	0	7.51513e-13	0
cesium-137	Cesium-137	from gypsum end-of-life	emissions to water	emissions to water, unspecified	4d9a8790-3ddd-11dd-9b3d-0050c2490048	13065	kBq	Eurostat - Prodcom	Not applicable	Not applicable	Method O	Ionizing radiation emissions from gypsum plaster and ceramics end of life						7.86										0	0	0	0	0	102691	0	0	0	0	0	0	0	0	0	0	0	0	0	0	1.82006e-07	0
cesium-137	Cesium-137	from electricity production	emissions to air	emissions to air, unspecified	4d9a8790-3ddd-11dd-9b37-0050c2490048	29058.4	kBq	Eurostat - Energy	ecoinvent 3	UNSCEAR	Method M1	Upscaling ionizing radiation from electricity production						0.636										0	0	0	0	0	18481.2	0	0	0	0	0	0	0	0	0	0	0	0	0	0	3.27554e-08	0
cesium-137	Cesium-137	from fuel reprocessing	emissions to air	emissions to air, unspecified	4d9a8790-3ddd-11dd-9b37-0050c2490048	1.7497e+07	kBq	Fissilematerials.org	UNSCEAR	Not applicable	Method M2	JRC - spent fuel reprocessing						0.636										0	0	0	0	0	1.11281e+07	0	0	0	0	0	0	0	0	0	0	0	0	0	0	1.97231e-05	0
cesium-137	Cesium-137	from electricity production	emissions to water	emissions to water, unspecified	4d9a8790-3ddd-11dd-9b3d-0050c2490048	6.46457e+07	kBq	Eurostat - Energy	ecoinvent 3	UNSCEAR	Method M1	Upscaling ionizing radiation from electricity production						7.86										0	0	0	0	0	5.08115e+08	0	0	0	0	0	0	0	0	0	0	0	0	0	0	0.000900567	0
cesium-137	Cesium-137	from fuel reprocessing	emissions to water	emissions to water, unspecified	4d9a8790-3ddd-11dd-9b3d-0050c2490048	6.64241e+09	kBq	Fissilematerials.org	UNSCEAR	Not applicable	Method M2	JRC - spent fuel reprocessing						7.86										0	0	0	0	0	5.22093e+10	0	0	0	0	0	0	0	0	0	0	0	0	0	0	0.0925341	0
CFC-10	Tetrachloromethane		emissions to soil	emissions to soil, unspecified	fe0acd60-3ddc-11dd-a928-0050c2490048	0	kg	`	Not applicable	Not applicable	Method E				4.20951e-05	0.000139723									2.26923			0	0	0	0	0	0	0	0	0	0	0	0	0	0	0	0	0	0	0	0	0	0
CFC-10	Tetrachloromethane	Non-industrial releases	emissions to water	emissions to water, unspecified	fe0acd60-3ddc-11dd-a92f-0050c2490048	1361.15	kg	Waterbase	Eurostat - WWTP-connection stats	Not applicable	Method D2	Toxic waterborne emissions	1400		4.16253e-05	0.000141623									66.3699			1.90561e+06	0	0.0566583	0.192771	0	0	0	0	0	0	0	0	90339.4	0	0	4.14225e-07	0	3.01729e-06	7.16894e-07	0	0	0
CFC-10	Tetrachloromethane (TCM)	Industrial releases	emissions to water	emissions to water, unspecified	fe0acd60-3ddc-11dd-a92f-0050c2490048	5497	kg	E-PRTR	EUROSTAT - economic data	Not applicable	Method D1	Toxic waterborne emissions	1400		4.16253e-05	0.000141623									66.3699			7.6958e+06	0	0.228814	0.778504	0	0	0	0	0	0	0	0	364835	0	0	1.67285e-06	0	1.21853e-05	2.89517e-06	0	0	0
CFC-10	Tetrachloromethane		emissions to air	emissions to air, unspecified	fe0acd60-3ddc-11dd-a929-0050c2490048	298354	kg	EMEP	E-PRTR	Literature	Method A	NMVOC breakdown estimates	1400	0.73	4.66699e-05	0.000154828									1.06665			4.17695e+08	217798	13.9241	46.1934	0	0	0	0	0	0	0	0	318239	0	0	9.07949e-05	0.0200856	0.000741519	0.000171788	0	0	0
CFC-11	CFC-11		emissions to water	emissions to water, unspecified	fe0acd60-3ddc-11dd-ac0f-0050c2490048	0	kg	Not applicable	Not applicable	Not applicable	Not applicable					1.6446e-06												0	0	0	0	0	0	0	0	0	0	0	0	0	0	0	0	0	0	0	0	0	0
CFC-11	CFC-11		emissions to soil	emissions to soil, unspecified	4d9a8790-3ddd-11dd-9bf9-0050c2490048	0	kg	Not applicable	Not applicable	Not applicable	Not applicable					1.70587e-06												0	0	0	0	0	0	0	0	0	0	0	0	0	0	0	0	0	0	0	0	0	0
CFC-11	fluorotrichloromethane (F11)		emissions to air	emissions to air, unspecified	fe0acd60-3ddc-11dd-9e51-0050c2490048	4.20779e+06	kg	EMEP	E-PRTR	Not applicable	Method C	Toxic airborne emissions	4750	1		1.79016e-06												1.9987e+10	4.20779e+06	0	7.53262	0	0	0	0	0	0	0	0	0	0	0	0.0043446	0.388047	0	2.8013e-05	0	0	0
CFC-114	1,2-dichloro-1,1,2,2-tetrafluoroethane CFC-114	missing	emissions to air	emissions to air, unspecified	08a91e70-3ddc-11dd-98b3-0050c2490048	0	kg	Not applicable	Not applicable	Not applicable	missing		10000	0.94														0	0	0	0	0	0	0	0	0	0	0	0	0	0	0	0	0	0	0	0	0	0
CFC-115	Monochloropentafluoroethane CFC-115	missing	emissions to air	emissions to air, unspecified	fe0acd60-3ddc-11dd-a3a8-0050c2490048	0	kg	Not applicable	Not applicable	Not applicable	missing		7370	0.44														0	0	0	0	0	0	0	0	0	0	0	0	0	0	0	0	0	0	0	0	0	0
CFC-12	CFC-12		emissions to water	emissions to water, unspecified	08a91e70-3ddc-11dd-965a-0050c2490048	0	kg	Not applicable	Not applicable	Not applicable	Not applicable					2.04531e-05												0	0	0	0	0	0	0	0	0	0	0	0	0	0	0	0	0	0	0	0	0	0
CFC-12	CFC-12		emissions to soil	emissions to soil, unspecified	fe0acd60-3ddc-11dd-af46-0050c2490048	0	kg	Not applicable	Not applicable	Not applicable	Not applicable					2.23788e-05												0	0	0	0	0	0	0	0	0	0	0	0	0	0	0	0	0	0	0	0	0	0
CFC-12	dichlorodifluoromethane		emissions to air	emissions to air, unspecified	fe0acd60-3ddc-11dd-9efe-0050c2490048	5.9433e+06	kg	EMEP	E-PRTR	Not applicable	Method C	Toxic airborne emissions	10900	1		2.30625e-05												6.4782e+10	5.9433e+06	0	137.068	0	0	0	0	0	0	0	0	0	0	0	0.0140817	0.548097	0	0.00050974	0	0	0
chinomethionate	Quinomethionate	Pesticides (surface water)	Emissions to water	Emissions to water, unspecified	c608f61c-5f0e-4c3e-97ab-b7a3a3edbcff	241.451	kg	Literature	Eurostat - harvested areas	Not applicable	Method F	Pesticides				3.00652e-05									2.38758e+06			0	0	0	0.00725927	0	0	0	0	0	0	0	0	5.76483e+08	0	0	0	0	0	2.69965e-08	0	0	0
chinomethionate	Quinomethionate	Pesticides (air)	Emissions to air	Emissions to air, unspecified	456c265a-7ae2-45ec-93de-de97ecc263dc	3621.77	kg	FAOstat - Pesticide usage data	Eurostat - harvested areas	Literature	Method F	Pesticides				1.24997e-05									88007.6			0	0	0	0.045271	0	0	0	0	0	0	0	0	3.18743e+08	0	0	0	0	0	1.68358e-07	0	0	0
chinomethionate	Quinomethionate	Pesticides (soil)	Emissions to soil	Emissions to soil, unspecified	129bc977-f582-4096-bf33-dafa7ef4ef77	4829.02	kg	FAOstat - Pesticide usage data	Eurostat - harvested areas	Literature	Method F	Pesticides				2.79247e-07									20685			0	0	0	0.00134849	0	0	0	0	0	0	0	0	9.98883e+07	0	0	0	0	0	5.0149e-09	0	0	0
chlorbromuron	Chlorbromuron	Pesticides (surface water)	Emissions to water	Emissions to water, unspecified	3d2ad137-1578-45aa-8f64-516352007db2	577.103	kg	Literature	Eurostat - harvested areas	Not applicable	Method F	Pesticides													16042.5			0	0	0	0	0	0	0	0	0	0	0	0	9.25817e+06	0	0	0	0	0	0	0	0	0
chlorbromuron	Chlorbromuron	Pesticides (air)	Emissions to air	Emissions to air, unspecified	ab2c7bef-31c1-407f-937c-e412ff6999a0	8656.55	kg	FAOstat - Pesticide usage data	Eurostat - harvested areas	Literature	Method F	Pesticides													717.164			0	0	0	0	0	0	0	0	0	0	0	0	6.20817e+06	0	0	0	0	0	0	0	0	0
chlorbromuron	Chlorbromuron	Pesticides (soil)	Emissions to soil	Emissions to soil, unspecified	6076e0e4-ec44-4f77-9847-ac4c11c4030a	39721.1	kg	FAOstat - Pesticide usage data	Eurostat - harvested areas	Literature	Method F	Pesticides													896.016			0	0	0	0	0	0	0	0	0	0	0	0	3.55907e+07	0	0	0	0	0	0	0	0	0
chlorbufam	Chlorbufam	Pesticides (surface water)	Emissions to water	Emissions to water, unspecified	46ea0ff3-e865-4718-9afb-5130214b731b	222.259	kg	Literature	Eurostat - harvested areas	Not applicable	Method F	Pesticides													2317.64			0	0	0	0	0	0	0	0	0	0	0	0	515117	0	0	0	0	0	0	0	0	0
chlorbufam	Chlorbufam	Pesticides (air)	Emissions to air	Emissions to air, unspecified	f2946540-9d6e-459a-818e-688f7c677a60	3333.89	kg	FAOstat - Pesticide usage data	Eurostat - harvested areas	Literature	Method F	Pesticides													60.1762			0	0	0	0	0	0	0	0	0	0	0	0	200621	0	0	0	0	0	0	0	0	0
chlorbufam	Chlorbufam	Pesticides (soil)	Emissions to soil	Emissions to soil, unspecified	cc1bc784-7174-47c4-8ad4-14e5c49e3f2d	15790.3	kg	FAOstat - Pesticide usage data	Eurostat - harvested areas	Literature	Method F	Pesticides													220.075			0	0	0	0	0	0	0	0	0	0	0	0	3.47505e+06	0	0	0	0	0	0	0	0	0
chlordane	Chlordane	pesticide	emissions to soil	emissions to soil, unspecified	08a91e70-3ddc-11dd-9266-0050c2490048	0	kg	E-PRTR	Not applicable	Not applicable	Method E				5.12249e-06	6.27699e-05									705.577			0	0	0	0	0	0	0	0	0	0	0	0	0	0	0	0	0	0	0	0	0	0
chlordane	Chlordane	Industrial releases	emissions to water	emissions to water, unspecified	08a91e70-3ddc-11dd-926d-0050c2490048	419.94	kg	E-PRTR	EUROSTAT - economic data	Not applicable	Method D1	Toxic waterborne emissions			0.000681102	0.00838675									246373			0	0	0.286022	3.52193	0	0	0	0	0	0	0	0	1.03462e+08	0	0	0	0	1.52319e-05	1.30977e-05	0	0	0
chlorfenson	Chlorfenson	Pesticides (surface water)	Emissions to water	Emissions to water, unspecified	fab8f1c5-0ced-4036-9111-7f87cc6c0e55	31.4782	kg	FAOstat - Pesticide usage data	Eurostat - harvested areas	Eurostat - organic farming areas	Method F					0.000156218									46222.3			0	0	0	0.00491747	0	0	0	0	0	0	0	0	1.455e+06	0	0	0	0	0	1.82876e-08	0	0	0
chlorfenson	Chlorfenson	Pesticides (air)	Emissions to air	Emissions to air, unspecified	0a91df70-3a33-4e83-9cff-78225fea5f15	472.174	kg	FAOstat - Pesticide usage data	Eurostat - harvested areas	Literature	Method F					1.3392e-05									1226.64			0	0	0	0.00632333	0	0	0	0	0	0	0	0	579186	0	0	0	0	0	2.35158e-08	0	0	0
chlorfenson	Chlorfenson	Pesticides (soil)	Emissions to soil	Emissions to soil, unspecified	8b7e1240-aec7-40e2-a558-f9e85aa86cdd	629.565	kg	FAOstat - Pesticide usage data	Eurostat - harvested areas	Eurostat - organic farming areas	Method F					1.02283e-06									288.938			0	0	0	0.000643936	0	0	0	0	0	0	0	0	181905	0	0	0	0	0	2.39473e-09	0	0	0
chlorfenvinfos	Chlorfenvinphos	Industrial releases	emissions to water	emissions to water, unspecified	4d9a8790-3ddd-11dd-8df4-0050c2490048	97.8326	kg	E-PRTR	EUROSTAT - economic data	Not applicable	Method D1	Toxic waterborne emissions				0.00117172									199961			0	0	0	0.114632	0	0	0	0	0	0	0	0	1.95627e+07	0	0	0	0	0	4.26306e-07	0	0	0
chlorfenvinfos	Chlorfenvinphos	Pesticides (surface water)	Emissions to water	Emissions to water, unspecified	4d9a8790-3ddd-11dd-8df4-0050c2490048	579	kg	Literature	Eurostat - harvested areas	Not applicable	Method F	Pesticides				0.00117172									199961			0	0	0	0.678425	0	0	0	0	0	0	0	0	1.15777e+08	0	0	0	0	0	2.52299e-06	0	0	0
chlorfenvinfos	Chlorfenvinphos	Pesticides (air)	Emissions to air	Emissions to air, unspecified	4d9a8790-3ddd-11dd-8dee-0050c2490048	8684.99	kg	FAOstat - Pesticide usage data	Eurostat - harvested areas	Literature	Method F	Pesticides				8.58277e-05									4198.83			0	0	0	0.745413	0	0	0	0	0	0	0	0	3.64668e+07	0	0	0	0	0	2.77211e-06	0	0	0
chlorfenvinfos	Chlorfenvinphos	Pesticides (soil)	Emissions to soil	Emissions to soil, unspecified	4d9a8790-3ddd-11dd-8ded-0050c2490048	11580	kg	FAOstat - Pesticide usage data	Eurostat - harvested areas	Literature	Method F	Pesticides				0.000101758									17300.8			0	0	0	1.17835	0	0	0	0	0	0	0	0	2.00343e+08	0	0	0	0	0	4.38217e-06	0	0	0
chloridazon	Chloridazon	Pesticides (surface water)	Emissions to water	Emissions to water, unspecified	4d9a8790-3ddd-11dd-90a9-0050c2490048	6117.56	kg	Literature	Eurostat - harvested areas	Not applicable	Method F	Pesticides													9317.72			0	0	0	0	0	0	0	0	0	0	0	0	5.70018e+07	0	0	0	0	0	0	0	0	0
chloridazon	Chloridazon	Pesticides (air)	Emissions to air	Emissions to air, unspecified	4d9a8790-3ddd-11dd-90a3-0050c2490048	91763.5	kg	FAOstat - Pesticide usage data	Eurostat - harvested areas	Literature	Method F	Pesticides													300.319			0	0	0	0	0	0	0	0	0	0	0	0	2.75583e+07	0	0	0	0	0	0	0	0	0
chloridazon	Chloridazon	Pesticides (soil)	Emissions to soil	Emissions to soil, unspecified	4d9a8790-3ddd-11dd-90a2-0050c2490048	451005	kg	FAOstat - Pesticide usage data	Eurostat - harvested areas	Literature	Method F	Pesticides													1108.36			0	0	0	0	0	0	0	0	0	0	0	0	4.99876e+08	0	0	0	0	0	0	0	0	0
chlorine	Chlorine		emissions to air	emissions to air, unspecified	4d9a8790-3ddd-11dd-9b45-0050c2490048	0	kg	Not applicable	Not applicable	Not applicable	Not applicable																	0	0	0	0	0	0	0	0	0	0	0	0	0	0	0	0	0	0	0	0	0	0
chlorine	Chlorine		emissions to water	emissions to water, unspecified	4d9a8790-3ddd-11dd-9b4b-0050c2490048	0	kg	Not applicable	Not applicable	Not applicable	Not applicable																	0	0	0	0	0	0	0	0	0	0	0	0	0	0	0	0	0	0	0	0	0	0
chlorine	Chlorine		emissions to soil	emissions to soil, unspecified	4d9a8790-3ddd-11dd-9b44-0050c2490048	0	kg	Not applicable	Not applicable	Not applicable	Not applicable																	0	0	0	0	0	0	0	0	0	0	0	0	0	0	0	0	0	0	0	0	0	0
chlormephos	Chlormephos	Pesticides (surface water)	Emissions to water	Emissions to water, unspecified	fe0acd60-3ddc-11dd-a61a-0050c2490048	578.864	kg	Literature	Eurostat - harvested areas	Not applicable	Method F	Pesticides													13211.1			0	0	0	0	0	0	0	0	0	0	0	0	7.64744e+06	0	0	0	0	0	0	0	0	0
chlormephos	Chlormephos	Pesticides (air)	Emissions to air	Emissions to air, unspecified	fe0acd60-3ddc-11dd-b149-0050c2490048	8682.96	kg	FAOstat - Pesticide usage data	Eurostat - harvested areas	Literature	Method F	Pesticides													3.04992			0	0	0	0	0	0	0	0	0	0	0	0	26482.3	0	0	0	0	0	0	0	0	0
chlormephos	Chlormephos	Pesticides (soil)	Emissions to soil	Emissions to soil, unspecified	fe0acd60-3ddc-11dd-b148-0050c2490048	11577.3	kg	FAOstat - Pesticide usage data	Eurostat - harvested areas	Literature	Method F	Pesticides													776.452			0	0	0	0	0	0	0	0	0	0	0	0	8.9892e+06	0	0	0	0	0	0	0	0	0
chlormequat	Chlormequat	Pesticides (surface water)	Emissions to water	Emissions to water, unspecified	1f31e7aa-6556-11dd-ad8b-0800200c9a66	70665.7	kg	FAOstat - Pesticide usage data	Eurostat - harvested areas	Eurostat - organic farming areas	Method F					3.80084e-07												0	0	0	0.0268589	0	0	0	0	0	0	0	0	0	0	0	0	0	0	9.98854e-08	0	0	0
chlormequat	Chlormequat	Pesticides (air)	Emissions to air	Emissions to air, unspecified	1f31e7a2-6556-11dd-ad8b-0800200c9a66	1.05999e+06	kg	FAOstat - Pesticide usage data	Eurostat - harvested areas	Literature	Method F					3.09559e-07												0	0	0	0.328128	0	0	0	0	0	0	0	0	0	0	0	0	0	0	1.22027e-06	0	0	0
chlormequat	Chlormequat	Pesticides (soil)	Emissions to soil	Emissions to soil, unspecified	fe0acd60-3ddc-11dd-a61e-0050c2490048	1.41331e+06	kg	FAOstat - Pesticide usage data	Eurostat - harvested areas	Eurostat - organic farming areas	Method F					6.6312e-08												0	0	0	0.0937197	0	0	0	0	0	0	0	0	0	0	0	0	0	0	3.48534e-07	0	0	0
chlorobenzene	chlorobenzene		emissions to air	emissions to air, unspecified	fe0acd60-3ddc-11dd-a2e0-0050c2490048	0	kg	EMEP	E-PRTR	Literature	Method A	NMVOC breakdown estimates			1.05009e-07	1.08748e-07									0.845845			0	0	0	0	0	0	0	0	0	0	0	0	0	0	0	0	0	0	0	0	0	0
chloroform	Trichloromethane		emissions to soil	emissions to soil, unspecified	fe0acd60-3ddc-11dd-aeff-0050c2490048	0	kg	Not applicable	Not applicable	Not applicable	Not applicable				1.4753e-07	7.95083e-07									2.08589			0	0	0	0	0	0	0	0	0	0	0	0	0	0	0	0	0	0	0	0	0	0
chloroform	Trichloromethane	Non-industrial releases	emissions to water	emissions to water, unspecified	08a91e70-3ddc-11dd-9645-0050c2490048	5295.87	kg	Waterbase	Eurostat - WWTP-connection stats	Not applicable	Method D2	Toxic waterborne emissions			3.90348e-07	1.17493e-06									41.1789			0	0	0.00206723	0.00622225	0	0	0	0	0	0	0	0	218078	0	0	0	0	1.10089e-07	2.31399e-08	0	0	0
chloroform	Trichloromethane	Industrial releases	emissions to water	emissions to water, unspecified	08a91e70-3ddc-11dd-9645-0050c2490048	23839.8	kg	E-PRTR	EUROSTAT - economic data	Not applicable	Method D1	Toxic waterborne emissions			3.90348e-07	1.17493e-06									41.1789			0	0	0.00930583	0.0280101	0	0	0	0	0	0	0	0	981698	0	0	0	0	4.95575e-07	1.04166e-07	0	0	0
chloroform	chloroform		emissions to air	emissions to air, unspecified	fe0acd60-3ddc-11dd-af00-0050c2490048	3.45779e+06	kg	EMEP	E-PRTR	Literature	Method A	NMVOC breakdown estimates	31		2.30592e-07	1.32026e-06			0.0389						0.281949			1.07191e+08	0	0.797338	4.56517	0	0	134508	0	0	0	0	0	974918	0	0	2.33003e-05	0	4.24616e-05	1.69774e-05	0	0	8.50946e-06
chlorothalonil	Chlorothalonil	Pesticides (surface water)	Emissions to water	Emissions to water, unspecified	4d9a8790-3ddd-11dd-9216-0050c2490048	6324.02	kg	Literature	Eurostat - harvested areas	Not applicable	Method F	Pesticides			1.18011e-07	3.55674e-06									1.15287e+06			0	0	0.000746302	0.0224929	0	0	0	0	0	0	0	0	7.2908e+09	0	0	0	0	3.97437e-08	8.36486e-08	0	0	0
chlorothalonil	Chlorothalonil	Pesticides (air)	Emissions to air	Emissions to air, unspecified	4d9a8790-3ddd-11dd-9210-0050c2490048	94860.3	kg	FAOstat - Pesticide usage data	Eurostat - harvested areas	Literature	Method F	Pesticides			5.79028e-08	1.74514e-06									78960.9			0	0	0.00549268	0.165544	0	0	0	0	0	0	0	0	7.49025e+09	0	0	0	0	2.92508e-07	6.15642e-07	0	0	0
chlorothalonil	Chlorothalonil	Pesticides (soil)	Emissions to soil	Emissions to soil, unspecified	4d9a8790-3ddd-11dd-920f-0050c2490048	126480	kg	FAOstat - Pesticide usage data	Eurostat - harvested areas	Literature	Method F	Pesticides			1.15634e-08	3.48509e-07									57823.9			0	0	0.00146254	0.0440795	0	0	0	0	0	0	0	0	7.31359e+09	0	0	0	0	7.78863e-08	1.63927e-07	0	0	0
chlorpropham	Chlorpropham	Pesticides (surface water)	Emissions to water	Emissions to water, unspecified	08a91e70-3ddc-11dd-9667-0050c2490048	222.259	kg	Literature	Eurostat - harvested areas	Not applicable	Method F	Pesticides				3.70202e-06									5493.24			0	0	0	0.000822808	0	0	0	0	0	0	0	0	1.22092e+06	0	0	0	0	0	3.05994e-09	0	0	0
chlorpropham	Chlorpropham	Pesticides (air)	Emissions to air	Emissions to air, unspecified	fe0acd60-3ddc-11dd-a00e-0050c2490048	3333.89	kg	FAOstat - Pesticide usage data	Eurostat - harvested areas	Literature	Method F	Pesticides				6.0093e-07									59.5609			0	0	0	0.00200343	0	0	0	0	0	0	0	0	198569	0	0	0	0	0	7.45055e-09	0	0	0
chlorpropham	Chlorpropham	Pesticides (soil)	Emissions to soil	Emissions to soil, unspecified	08a91e70-3ddc-11dd-9271-0050c2490048	15790.3	kg	FAOstat - Pesticide usage data	Eurostat - harvested areas	Literature	Method F	Pesticides				1.76026e-07									234.8			0	0	0	0.00277951	0	0	0	0	0	0	0	0	3.70757e+06	0	0	0	0	0	1.03367e-08	0	0	0
chlorpyrifos	Chlorpyrifos	Industrial releases	emissions to water	emissions to water, unspecified	08a91e70-3ddc-11dd-9ac5-0050c2490048	463.702	kg	E-PRTR	EUROSTAT - economic data	Not applicable	Method D1	Toxic waterborne emissions				0.00050599									6.20682e+06			0	0	0	0.234629	0	0	0	0	0	0	0	0	2.87811e+09	0	0	0	0	0	8.72559e-07	0	0	0
chlorpyrifos	Chlorpyrifos	Pesticides (surface water)	Emissions to water	Emissions to water, unspecified	08a91e70-3ddc-11dd-9ac5-0050c2490048	5699.76	kg	Literature	Eurostat - harvested areas	Not applicable	Method F	Pesticides				0.00050599									6.20682e+06			0	0	0	2.88402	0	0	0	0	0	0	0	0	3.53774e+10	0	0	0	0	0	1.07254e-05	0	0	0
chlorpyrifos	Chlorpyrifos	Pesticides (air)	Emissions to air	Emissions to air, unspecified	08a91e70-3ddc-11dd-9275-0050c2490048	85496.3	kg	FAOstat - Pesticide usage data	Eurostat - harvested areas	Literature	Method F	Pesticides				8.70908e-06									21294.1			0	0	0	0.744595	0	0	0	0	0	0	0	0	1.82057e+09	0	0	0	0	0	2.76907e-06	0	0	0
chlorpyrifos	Chlorpyrifos	Pesticides (soil)	Emissions to soil	Emissions to soil, unspecified	08a91e70-3ddc-11dd-9274-0050c2490048	113995	kg	FAOstat - Pesticide usage data	Eurostat - harvested areas	Literature	Method F	Pesticides				9.11102e-06									105994			0	0	0	1.03861	0	0	0	0	0	0	0	0	1.20828e+10	0	0	0	0	0	3.86249e-06	0	0	0
chlorpyrifos-methyl	Chlorpyrifos-Methyl	Pesticides (surface water)	Emissions to water	Emissions to water, unspecified	925fd651-2401-47d3-9c77-a1dcb419d943	792.671	kg	Literature	Eurostat - harvested areas	Not applicable	Method F	Pesticides				0.000481187									725649			0	0	0	0.381423	0	0	0	0	0	0	0	0	5.75201e+08	0	0	0	0	0	1.41847e-06	0	0	0
chlorpyrifos-methyl	Chlorpyrifos-Methyl	Pesticides (air)	Emissions to air	Emissions to air, unspecified	3d1f2370-580e-45bd-a561-fc0a8bb92ddd	11890.1	kg	FAOstat - Pesticide usage data	Eurostat - harvested areas	Literature	Method F	Pesticides				2.76528e-05									2933.14			0	0	0	0.328793	0	0	0	0	0	0	0	0	3.48753e+07	0	0	0	0	0	1.22275e-06	0	0	0
chlorpyrifos-methyl	Chlorpyrifos-Methyl	Pesticides (soil)	Emissions to soil	Emissions to soil, unspecified	58f9434b-c3e8-4e68-a7e3-ee5acc55ad4a	15853.4	kg	FAOstat - Pesticide usage data	Eurostat - harvested areas	Literature	Method F	Pesticides				5.30262e-06									6605.11			0	0	0	0.0840646	0	0	0	0	0	0	0	0	1.04713e+08	0	0	0	0	0	3.12627e-07	0	0	0
chlorsulfuron	Chlorsulfuron	Pesticides (surface water)	Emissions to water	Emissions to water, unspecified	fe0acd60-3ddc-11dd-a765-0050c2490048	6.86147	kg	FAOstat - Pesticide usage data	Eurostat - harvested areas	Eurostat - organic farming areas	Method F					2.91068e-06									12244.9			0	0	0	1.99716e-05	0	0	0	0	0	0	0	0	84018	0	0	0	0	0	7.42721e-11	0	0	0
chlorsulfuron	Chlorsulfuron	Pesticides (air)	Emissions to air	Emissions to air, unspecified	08a91e70-3ddc-11dd-9dad-0050c2490048	102.922	kg	FAOstat - Pesticide usage data	Eurostat - harvested areas	Literature	Method F					2.80719e-06									1652.57			0	0	0	0.000288922	0	0	0	0	0	0	0	0	170086	0	0	0	0	0	1.07447e-09	0	0	0
chlorsulfuron	Chlorsulfuron	Pesticides (soil)	Emissions to soil	Emissions to soil, unspecified	08a91e70-3ddc-11dd-9dac-0050c2490048	507.749	kg	FAOstat - Pesticide usage data	Eurostat - harvested areas	Eurostat - organic farming areas	Method F					4.10697e-07									1727.75			0	0	0	0.000208531	0	0	0	0	0	0	0	0	877265	0	0	0	0	0	7.75504e-10	0	0	0
chlortetracycline	Chlortetracycline	manure	emissions to soil	emissions to soil, unspecified	9b73c388-f184-45f0-b9a8-20a38c7d73ff	15945.3	kg	FAOstat - manure application	Literature	Not applicable	Method E														306.823			0	0	0	0	0	0	0	0	0	0	0	0	4.89238e+06	0	0	0	0	0	0	0	0	0
chlortoluron	Chlorotoluron	Pesticides (surface water)	Emissions to water	Emissions to water, unspecified	3e4c8d22-6556-11dd-ad8b-0800200c9a66	936.979	kg	Literature	Eurostat - harvested areas	Not applicable	Method F	Pesticides													2690.41			0	0	0	0	0	0	0	0	0	0	0	0	2.52086e+06	0	0	0	0	0	0	0	0	0
chlortoluron	Chlorotoluron	Pesticides (air)	Emissions to air	Emissions to air, unspecified	3e4c6627-6556-11dd-ad8b-0800200c9a66	14054.7	kg	FAOstat - Pesticide usage data	Eurostat - harvested areas	Literature	Method F	Pesticides													94.3647			0	0	0	0	0	0	0	0	0	0	0	0	1.32627e+06	0	0	0	0	0	0	0	0	0
chlortoluron	Chlorotoluron	Pesticides (soil)	Emissions to soil	Emissions to soil, unspecified	08a91e70-3ddc-11dd-9ac9-0050c2490048	66351.8	kg	FAOstat - Pesticide usage data	Eurostat - harvested areas	Literature	Method F	Pesticides													352.622			0	0	0	0	0	0	0	0	0	0	0	0	2.33971e+07	0	0	0	0	0	0	0	0	0
chromium	Chromium	Non-industrial releases	emissions to water	emissions to water, unspecified	08a91e70-3ddc-11dd-9f75-0050c2490048	42221.7	kg	Waterbase	Eurostat - WWTP-connection stats	Not applicable	Method D2	Toxic waterborne emissions			0.00532062	1.19778e-05									52969.4			0	0	224.646	0.505725	0	0	0	0	0	0	0	0	2.23646e+09	0	0	0	0	0.0119633	1.88074e-06	0	0	0
chromium	Chromium	sludge	emissions to soil	emissions to soil, unspecified	08a91e70-3ddc-11dd-9acb-0050c2490048	273974	kg	Eurostat - sewage sludge usage	Literature	Not applicable	Method E				0.00267216	6.01559e-06									26602.7			0	0	732.104	1.64812	0	0	0	0	0	0	0	0	7.28845e+09	0	0	0	0	0.0389876	6.12918e-06	0	0	0
Chromium	Cr		emissions to air	emissions to air, unspecified	08a91e70-3ddc-11dd-9acc-0050c2490048	377305	kg	EMEP	E-PRTR	Not applicable	Method C	Toxic airborne emissions			0.00222617	0.000207872									21245.9			0	0	839.944	78.4312	0	0	0	0	0	0	0	0	8.01617e+09	0	0	0	0	0.0447306	0.000291678	0	0	0
chromium	Chromium	manure	emissions to soil	emissions to soil, unspecified	08a91e70-3ddc-11dd-9acb-0050c2490048	3.62233e+06	kg	FAOstat - manure application	Literature	Not applicable	Method E				0.00267216	6.01559e-06									26602.7			0	0	9679.45	21.7905	0	0	0	0	0	0	0	0	9.63637e+10	0	0	0	0	0.515472	8.10365e-05	0	0	0
chromium	Chromium ores - metal content	metal content	resource flows	Non-renewable element resources from ground	08a91e70-3ddc-11dd-9f78-0050c2490048	295150000	kg	World Mining Data	Not applicable	Not applicable	Method K3																1.96e-05	0	0	0	0	0	0	0	0	0	0	0	0	0	0	5784.94	0	0	0	0	0	0	0
chromium III	chromium III	Industrial releases	emissions to soil	emissions to soil, unspecified	08a91e70-3ddc-11dd-9f7a-0050c2490048	7180	kg	E-PRTR	Not applicable	Not applicable	Not applicable					1.52011e-09									650.179			0	0	0	1.09144e-05	0	0	0	0	0	0	0	0	4.66829e+06	0	0	0	0	0	4.05895e-11	0	0	0
chromium III	Chromium and compounds (as Cr)	Industrial releases	emissions to water	emissions to water, unspecified	4d9a8790-3ddd-11dd-8fd2-0050c2490048	601886	kg	E-PRTR	EUROSTAT - economic data	Not applicable	Method D1	Toxic waterborne emissions				3.02674e-09									1294.59			0	0	0	0.00182175	0	0	0	0	0	0	0	0	7.79197e+08	0	0	0	0	0	6.77491e-09	0	0	0
chromium VI	chromium VI		emissions to water	emissions to water, unspecified	4d9a8790-3ddd-11dd-9c1d-0050c2490048	0	kg	Not applicable	Not applicable	Not applicable	Not applicable				0.0106412	2.39526e-05									104644			0	0	0	0	0	0	0	0	0	0	0	0	0	0	0	0	0	0	0	0	0	0
chromium VI	chromium VI		emissions to soil	emissions to soil, unspecified	4d9a8790-3ddd-11dd-8fd6-0050c2490048	0	kg	Not applicable	Not applicable	Not applicable	Not applicable				0.00534432	1.20297e-05									52555.2			0	0	0	0	0	0	0	0	0	0	0	0	0	0	0	0	0	0	0	0	0	0
chromium-51	Chromium-51	from medical sector	emissions to water	emissions to water, unspecified	4d9a8790-3ddd-11dd-9c26-0050c2490048	0	kBq	Not applicable	Not applicable	Not applicable	method N																	0	0	0	0	0	0	0	0	0	0	0	0	0	0	0	0	0	0	0	0	0	0
chromium-51	Chromium-51	from Phosphate industry	emissions to water	emissions to water, unspecified	4d9a8790-3ddd-11dd-9c26-0050c2490048	0	kBq	Not applicable	Not applicable	Not applicable	method N																	0	0	0	0	0	0	0	0	0	0	0	0	0	0	0	0	0	0	0	0	0	0
chromium-51	Chromium-51	from Primary steel manufacture	emissions to water	emissions to water, unspecified	4d9a8790-3ddd-11dd-9c26-0050c2490048	0	kBq	Not applicable	Not applicable	Not applicable	method N																	0	0	0	0	0	0	0	0	0	0	0	0	0	0	0	0	0	0	0	0	0	0
chromium-51	Chromium-51	from radiochemical production	emissions to water	emissions to water, unspecified	4d9a8790-3ddd-11dd-9c26-0050c2490048	0	kBq	Not applicable	Not applicable	Not applicable	method N																	0	0	0	0	0	0	0	0	0	0	0	0	0	0	0	0	0	0	0	0	0	0
chromium-51	Chromium-51	from Rare Earth production	emissions to water	emissions to water, unspecified	4d9a8790-3ddd-11dd-9c26-0050c2490048	0	kBq	Not applicable	Not applicable	Not applicable	method N																	0	0	0	0	0	0	0	0	0	0	0	0	0	0	0	0	0	0	0	0	0	0
chromium-51	Chromium-51	from the offshore oil and gas industry	emissions to water	emissions to water, unspecified	4d9a8790-3ddd-11dd-9c26-0050c2490048	0	kBq	Not applicable	Not applicable	Not applicable	method N																	0	0	0	0	0	0	0	0	0	0	0	0	0	0	0	0	0	0	0	0	0	0
chromium-51	Chromium-51	from Titanium dioxide pigment manufacturers	emissions to water	emissions to water, unspecified	4d9a8790-3ddd-11dd-9c26-0050c2490048	0	kBq	Not applicable	Not applicable	Not applicable	method N																	0	0	0	0	0	0	0	0	0	0	0	0	0	0	0	0	0	0	0	0	0	0
chromium-51	Chromium-51	from gypsum end-of-life	emissions to air	emissions to air, unspecified	4d9a8790-3ddd-11dd-9c20-0050c2490048	0.0500648	kBq	Eurostat - Prodcom	ecoinvent 3	Not applicable	Method O	Ionizing radiation emissions from gypsum plaster and ceramics end of life																0	0	0	0	0	0	0	0	0	0	0	0	0	0	0	0	0	0	0	0	0	0
chromium-51	Chromium-51	from gypsum end-of-life	emissions to water	emissions to water, unspecified	4d9a8790-3ddd-11dd-9c26-0050c2490048	624.443	kBq	Eurostat - Prodcom	Not applicable	Not applicable	Method O	Ionizing radiation emissions from gypsum plaster and ceramics end of life																0	0	0	0	0	0	0	0	0	0	0	0	0	0	0	0	0	0	0	0	0	0
chromium-51	Chromium-51	from electricity production	emissions to air	emissions to air, unspecified	4d9a8790-3ddd-11dd-9c20-0050c2490048	2107.42	kBq	Eurostat - Energy	ecoinvent 3	UNSCEAR	Method M1	Upscaling ionizing radiation from electricity production																0	0	0	0	0	0	0	0	0	0	0	0	0	0	0	0	0	0	0	0	0	0
chromium-51	Chromium-51	from universities and research	emissions to water	emissions to water, unspecified	4d9a8790-3ddd-11dd-9c26-0050c2490048	1.1243e+07	kBq	Not applicable	Not applicable	Not applicable	method N																	0	0	0	0	0	0	0	0	0	0	0	0	0	0	0	0	0	0	0	0	0	0
chromium-51	Chromium-51	from electricity production	emissions to water	emissions to water, unspecified	4d9a8790-3ddd-11dd-9c26-0050c2490048	2.82668e+07	kBq	Eurostat - Energy	ecoinvent 3	UNSCEAR	Method M1	Upscaling ionizing radiation from electricity production																0	0	0	0	0	0	0	0	0	0	0	0	0	0	0	0	0	0	0	0	0	0
cis-1,2-dichloroethylene	1,2-dichloroethene		emissions to air	emissions to air, unspecified	fe0acd60-3ddc-11dd-a49b-0050c2490048	420380	kg	EMEP	E-PRTR	Literature	Method A	NMVOC breakdown estimates							0.755									0	0	0	0	0	0	317387	0	0	0	0	0	0	0	0	0	0	0	0	0	0	2.0079e-05
cis-2-pentene	cis-2-pentene		emissions to air	emissions to air, unspecified	08a91e70-3ddc-11dd-91d1-0050c2490048	7.27151e+06	kg	EMEP	E-PRTR	Literature	Method A	NMVOC breakdown estimates							1.89									0	0	0	0	0	0	1.37432e+07	0	0	0	0	0	0	0	0	0	0	0	0	0	0	0.000869443
clay	Common clays and shales for construction use (including for bricks, tiles, pipes, cement; excluding bentonite, attapulgite and sepiolite, fireclay-expanded clays-kaolin and kaolinic clays)		resource flows	Non-renewable material resources from ground	08a91e70-3ddc-11dd-9276-0050c2490048	2.93712e+10	kg	Eurostat - Prodcom	Not applicable	Not applicable	Method K3	Time interpolation for resource depletion - metal ores and minerals																0	0	0	0	0	0	0	0	0	0	0	0	0	0	0	0	0	0	0	0	0	0
clethodim	Clethodim	Pesticides (surface water)	Emissions to water	Emissions to water, unspecified	e8a256de-25fd-4755-a392-c18e70cd63a1	138.02	kg	Literature	Eurostat - harvested areas	Not applicable	Method F	Pesticides													3290.52			0	0	0	0	0	0	0	0	0	0	0	0	454159	0	0	0	0	0	0	0	0	0
clethodim	Clethodim	Pesticides (air)	Emissions to air	Emissions to air, unspecified	4d6b199c-dbe6-46a8-969c-e7e36d6175b4	2070.3	kg	FAOstat - Pesticide usage data	Eurostat - harvested areas	Literature	Method F	Pesticides													34.4263			0	0	0	0	0	0	0	0	0	0	0	0	71272.9	0	0	0	0	0	0	0	0	0
clethodim	Clethodim	Pesticides (soil)	Emissions to soil	Emissions to soil, unspecified	7af03056-78a5-47aa-981c-2e4435b62572	10213.5	kg	FAOstat - Pesticide usage data	Eurostat - harvested areas	Literature	Method F	Pesticides													8.47813			0	0	0	0	0	0	0	0	0	0	0	0	86591.4	0	0	0	0	0	0	0	0	0
clomazone	Clomazone	Pesticides (surface water)	Emissions to water	Emissions to water, unspecified	08a91e70-3ddc-11dd-9dce-0050c2490048	173.621	kg	FAOstat - Pesticide usage data	Eurostat - harvested areas	Eurostat - organic farming areas	Method F														7799.68			0	0	0	0	0	0	0	0	0	0	0	0	1.35419e+06	0	0	0	0	0	0	0	0	0
clomazone	Clomazone	Pesticides (air)	Emissions to air	Emissions to air, unspecified	4d9a8790-3ddd-11dd-942f-0050c2490048	2604.31	kg	FAOstat - Pesticide usage data	Eurostat - harvested areas	Literature	Method F														236.75			0	0	0	0	0	0	0	0	0	0	0	0	616571	0	0	0	0	0	0	0	0	0
clomazone	Clomazone	Pesticides (soil)	Emissions to soil	Emissions to soil, unspecified	08a91e70-3ddc-11dd-9278-0050c2490048	10989.9	kg	FAOstat - Pesticide usage data	Eurostat - harvested areas	Eurostat - organic farming areas	Method F														479.723			0	0	0	0	0	0	0	0	0	0	0	0	5.27212e+06	0	0	0	0	0	0	0	0	0
clopyralid	Clopyralid	Pesticides (surface water)	Emissions to water	Emissions to water, unspecified	08a91e70-3ddc-11dd-a28b-0050c2490048	561.213	kg	FAOstat - Pesticide usage data	Eurostat - harvested areas	Eurostat - organic farming areas	Method F														912.074			0	0	0	0	0	0	0	0	0	0	0	0	511867	0	0	0	0	0	0	0	0	0
clopyralid	Clopyralid	Pesticides (air)	Emissions to air	Emissions to air, unspecified	08a91e70-3ddc-11dd-927c-0050c2490048	8418.19	kg	FAOstat - Pesticide usage data	Eurostat - harvested areas	Literature	Method F														226.763			0	0	0	0	0	0	0	0	0	0	0	0	1.90894e+06	0	0	0	0	0	0	0	0	0
clopyralid	Clopyralid	Pesticides (soil)	Emissions to soil	Emissions to soil, unspecified	08a91e70-3ddc-11dd-927b-0050c2490048	41529.8	kg	FAOstat - Pesticide usage data	Eurostat - harvested areas	Eurostat - organic farming areas	Method F														269.88			0	0	0	0	0	0	0	0	0	0	0	0	1.12081e+07	0	0	0	0	0	0	0	0	0
cobalt	Co		emissions to air	Emissions to air, unspecified	08a91e70-3ddc-11dd-9283-0050c2490048	0	kg	Not applicable	Not applicable	Not applicable	Not applicable														1714.3			0	0	0	0	0	0	0	0	0	0	0	0	0	0	0	0	0	0	0	0	0	0
cobalt	Cobalt	metal content	resource flows	Non-renewable element resources from ground	fe0acd60-3ddc-11dd-a4f3-0050c2490048	30000	kg	British Geological Survey	Not applicable	Not applicable	Method K3																0.0256	0	0	0	0	0	0	0	0	0	0	0	0	0	0	768	0	0	0	0	0	0	0
cobalt-57	Cobalt-57	from gypsum end-of-life	emissions to water	emissions to water, unspecified	fe0acd60-3ddc-11dd-a4f6-0050c2490048	23.0288	kBq	Eurostat - Prodcom	Not applicable	Not applicable	Method O	Ionizing radiation emissions from gypsum plaster and ceramics end of life																0	0	0	0	0	0	0	0	0	0	0	0	0	0	0	0	0	0	0	0	0	0
cobalt-57	Cobalt-57	from electricity production	emissions to water	emissions to water, unspecified	fe0acd60-3ddc-11dd-a4f6-0050c2490048	2.1882e+06	kBq	Eurostat - Energy	ecoinvent 3	UNSCEAR	Method M1	Upscaling ionizing radiation from electricity production																0	0	0	0	0	0	0	0	0	0	0	0	0	0	0	0	0	0	0	0	0	0
cobalt-58	Cobalt-58	from gypsum end-of-life	emissions to air	emissions to air, unspecified	fe0acd60-3ddc-11dd-a4f7-0050c2490048	0.0773333	kBq	Eurostat - Prodcom	ecoinvent 3	Not applicable	Method O	Ionizing radiation emissions from gypsum plaster and ceramics end of life						0.02										0	0	0	0	0	0.00154667	0	0	0	0	0	0	0	0	0	0	0	0	0	0	2.74126e-15	0
cobalt-58	Cobalt-58	from gypsum end-of-life	emissions to water	emissions to water, unspecified	08a91e70-3ddc-11dd-969c-0050c2490048	3229.35	kBq	Eurostat - Prodcom	Not applicable	Not applicable	Method O	Ionizing radiation emissions from gypsum plaster and ceramics end of life						0.00193										0	0	0	0	0	6.23265	0	0	0	0	0	0	0	0	0	0	0	0	0	0	1.10465e-11	0
cobalt-58	Cobalt-58	from electricity production	emissions to air	emissions to air, unspecified	fe0acd60-3ddc-11dd-a4f7-0050c2490048	5496.15	kBq	Eurostat - Energy	ecoinvent 3	UNSCEAR	Method M1	Upscaling ionizing radiation from electricity production						0.02										0	0	0	0	0	109.923	0	0	0	0	0	0	0	0	0	0	0	0	0	0	1.94824e-10	0
cobalt-58	Cobalt-58	from electricity production	emissions to water	emissions to water, unspecified	08a91e70-3ddc-11dd-969c-0050c2490048	3.10325e+08	kBq	Eurostat - Energy	ecoinvent 3	UNSCEAR	Method M1	Upscaling ionizing radiation from electricity production						0.00193										0	0	0	0	0	598928	0	0	0	0	0	0	0	0	0	0	0	0	0	0	1.06152e-06	0
cobalt-60	Cobalt-60	from gypsum end-of-life	emissions to air	emissions to air, unspecified	08a91e70-3ddc-11dd-969e-0050c2490048	0.651042	kBq	Eurostat - Prodcom	ecoinvent 3	Not applicable	Method O	Ionizing radiation emissions from gypsum plaster and ceramics end of life						0.786										0	0	0	0	0	0.511719	0	0	0	0	0	0	0	0	0	0	0	0	0	0	9.06954e-13	0
cobalt-60	Cobalt-60	from gypsum end-of-life	emissions to water	emissions to water, unspecified	fe0acd60-3ddc-11dd-a79c-0050c2490048	2584.64	kBq	Eurostat - Prodcom	Not applicable	Not applicable	Method O	Ionizing radiation emissions from gypsum plaster and ceramics end of life						2.07										0	0	0	0	0	5350.21	0	0	0	0	0	0	0	0	0	0	0	0	0	0	9.48255e-09	0
cobalt-60	Cobalt-60	from electricity production	emissions to air	emissions to air, unspecified	08a91e70-3ddc-11dd-969e-0050c2490048	37748.5	kBq	Eurostat - Energy	ecoinvent 3	UNSCEAR	Method M1	Upscaling ionizing radiation from electricity production						0.786										0	0	0	0	0	29670.3	0	0	0	0	0	0	0	0	0	0	0	0	0	0	5.25867e-08	0
cobalt-60	Cobalt-60	from electricity production	emissions to water	emissions to water, unspecified	fe0acd60-3ddc-11dd-a79c-0050c2490048	1.75968e+08	kBq	Eurostat - Energy	ecoinvent 3	UNSCEAR	Method M1	Upscaling ionizing radiation from electricity production						2.07										0	0	0	0	0	3.64255e+08	0	0	0	0	0	0	0	0	0	0	0	0	0	0	0.000645593	0
cobalt-60	Cobalt-60	from fuel reprocessing	emissions to water	emissions to water, unspecified	fe0acd60-3ddc-11dd-a79c-0050c2490048	1.32849e+10	kBq	Fissilematerials.org	UNSCEAR	Not applicable	Method M2	JRC - spent fuel reprocessing						2.07										0	0	0	0	0	2.74998e+10	0	0	0	0	0	0	0	0	0	0	0	0	0	0	0.0487397	0
copper	Copper	Pesticides (surface water)	Emissions to water	Emissions to water, unspecified	4d9a8790-3ddd-11dd-96cf-0050c2490048	4824.38	kg	FAOstat - Pesticide usage data	Eurostat - harvested areas	Eurostat - organic farming areas	Method F					8.62676e-07									55247.6			0	0	0	0.00416187	0	0	0	0	0	0	0	0	2.66535e+08	0	0	0	0	0	1.54776e-08	0	0	0
copper	Copper	Pesticides (air)	Emissions to air	Emissions to air, unspecified	fe0acd60-3ddc-11dd-a7a0-0050c2490048	72365.6	kg	FAOstat - Pesticide usage data	Eurostat - harvested areas	Literature	Method F					1.34414e-05									23205.1			0	0	0	0.972695	0	0	0	0	0	0	0	0	1.67925e+09	0	0	0	0	0	3.61735e-06	0	0	0
copper	Copper	Non-industrial releases	emissions to water	emissions to water, unspecified	4d9a8790-3ddd-11dd-96cf-0050c2490048	254680	kg	Waterbase	Eurostat - WWTP-connection stats	Not applicable	Method D2	Toxic waterborne emissions				8.62676e-07									55247.6			0	0	0	0.219706	0	0	0	0	0	0	0	0	1.40704e+10	0	0	0	0	0	8.17063e-07	0	0	0
copper	Copper and compounds (as Cu)	Industrial releases	emissions to water	emissions to water, unspecified	4d9a8790-3ddd-11dd-96cf-0050c2490048	556729	kg	E-PRTR	EUROSTAT - economic data	Not applicable	Method D1	Toxic waterborne emissions				8.62676e-07									55247.6			0	0	0	0.480277	0	0	0	0	0	0	0	0	3.07579e+10	0	0	0	0	0	1.7861e-06	0	0	0
copper	Copper and compounds (as Cu)	Industrial releases	emissions to soil	emissions to soil, unspecified	fe0acd60-3ddc-11dd-a79f-0050c2490048	45200	kg	E-PRTR	EUROSTAT - economic data	Not applicable	Method E					4.55394e-07									29164.4			0	0	0	0.0205838	0	0	0	0	0	0	0	0	1.31823e+09	0	0	0	0	0	7.6549e-08	0	0	0
copper	Copper	sludge	emissions to soil	emissions to soil, unspecified	fe0acd60-3ddc-11dd-a79f-0050c2490048	1.20178e+06	kg	Eurostat - sewage sludge usage	Literature	Not applicable	Method E					4.55394e-07									29164.4			0	0	0	0.547283	0	0	0	0	0	0	0	0	3.50491e+10	0	0	0	0	0	2.03529e-06	0	0	0
Copper	Cu		emissions to air	emissions to air, unspecified	fe0acd60-3ddc-11dd-a7a0-0050c2490048	3.78474e+06	kg	EMEP	E-PRTR	Not applicable	Method C	Toxic airborne emissions				1.34414e-05									23205.1			0	0	0	50.8722	0	0	0	0	0	0	0	0	8.78253e+10	0	0	0	0	0	0.000189188	0	0	0
copper	Copper	manure	emissions to soil	emissions to soil, unspecified	fe0acd60-3ddc-11dd-a79f-0050c2490048	3.05885e+07	kg	FAOstat - manure application	Literature	Not applicable	Method E					4.55394e-07									29164.4			0	0	0	13.9298	0	0	0	0	0	0	0	0	8.92095e+11	0	0	0	0	0	5.18035e-05	0	0	0
copper	Copper ores - metal content	metal content	resource flows	Non-renewable element resources from ground	fe0acd60-3ddc-11dd-ae5c-0050c2490048	765910000	kg	British Geological Survey	Not applicable	Not applicable	Method K3																0.0025	0	0	0	0	0	0	0	0	0	0	0	0	0	0	1914775	0	0	0	0	0	0	0
cresol	cresol		emissions to soil	emissions to soil, unspecified	1f30882f-6556-11dd-ad8b-0800200c9a66	0	kg	Not applicable	Not applicable	Not applicable	Not applicable														21.7894			0	0	0	0	0	0	0	0	0	0	0	0	0	0	0	0	0	0	0	0	0	0
cresol	cresol		emissions to water	emissions to water, unspecified	4d9a8790-3ddd-11dd-8f55-0050c2490048	0	kg	Not applicable	Not applicable	Not applicable	Not applicable														938.318			0	0	0	0	0	0	0	0	0	0	0	0	0	0	0	0	0	0	0	0	0	0
cresol	kresol		emissions to air	emissions to air, unspecified	1f30882a-6556-11dd-ad8b-0800200c9a66	2.72498e+07	kg	EMEP	E-PRTR	Literature	Method A	NMVOC breakdown estimates													7.53287			0	0	0	0	0	0	0	0	0	0	0	0	2.05269e+08	0	0	0	0	0	0	0	0	0
crotonaldehyde	crotonaldehyde		emissions to air	emissions to air, unspecified	4479bc7c-72f7-4914-a3e9-6b4ea9695fa3	189780	kg	EMEP	E-PRTR	Literature	Method A	NMVOC breakdown estimates													12.4269			0	0	0	0	0	0	0	0	0	0	0	0	2.35838e+06	0	0	0	0	0	0	0	0	0
crude oil; 42.3 MJ/kg	Crude oil [MJ]	energy equivalent	resource flows	Non-renewable energy resources from ground	fe0acd60-3ddc-11dd-a6f8-0050c2490048	3728335000000	MJ	Eurostat - Energy	Not applicable	Not applicable	Method K2																7.79e-09	0	0	0	0	0	0	0	0	0	0	0	0	0	0	29043.7	0	0	0	0	0	0	0
cumene	cumene		emissions to soil	emissions to soil, unspecified	08a91e70-3ddc-11dd-a2a1-0050c2490048	0	kg	Not applicable	Not applicable	Not applicable	Not applicable					1.45251e-09									2.47421			0	0	0	0	0	0	0	0	0	0	0	0	0	0	0	0	0	0	0	0	0	0
cumene	cumene		emissions to water	emissions to water, unspecified	4d9a8790-3ddd-11dd-988d-0050c2490048	0	kg	Not applicable	Not applicable	Not applicable	Not applicable					2.76719e-08									665.07			0	0	0	0	0	0	0	0	0	0	0	0	0	0	0	0	0	0	0	0	0	0
cumene	cumene		emissions to air	emissions to air, unspecified	08a91e70-3ddc-11dd-a2a2-0050c2490048	4.89081e+07	kg	EMEP	E-PRTR	Literature	Method A	NMVOC breakdown estimates				1.11219e-08			0.845						0.0824023			0	0	0	0.543953	0	0	4.13274e+07	0	0	0	0	0	4.03014e+06	0	0	0	0	0	2.0229e-06	0	0	0.00261452
cyanamide	Cyanamide	Pesticides (surface water)	Emissions to water	Emissions to water, unspecified	468857ec-5e60-465e-bc13-317b6157aaff	30.65	kg	FAOstat - Pesticide usage data	Eurostat - harvested areas	Eurostat - organic farming areas	Method F														3473.11			0	0	0	0	0	0	0	0	0	0	0	0	106451	0	0	0	0	0	0	0	0	0
cyanamide	Cyanamide	Pesticides (air)	Emissions to air	Emissions to air, unspecified	059dfbd8-efb2-467f-85f2-2ea4542fd6b7	459.75	kg	FAOstat - Pesticide usage data	Eurostat - harvested areas	Literature	Method F														856.254			0	0	0	0	0	0	0	0	0	0	0	0	393663	0	0	0	0	0	0	0	0	0
cyanamide	Cyanamide	Pesticides (soil)	Emissions to soil	Emissions to soil, unspecified	ea528856-6f48-4f0e-a97b-e8c7e327b624	613	kg	FAOstat - Pesticide usage data	Eurostat - harvested areas	Eurostat - organic farming areas	Method F														978.671			0	0	0	0	0	0	0	0	0	0	0	0	599925	0	0	0	0	0	0	0	0	0
cyanazine	Cyanazine	Pesticides (surface water)	Emissions to water	Emissions to water, unspecified	fe0acd60-3ddc-11dd-a7d5-0050c2490048	1126.54	kg	Literature	Eurostat - harvested areas	Not applicable	Method F	Pesticides			3.79023e-05										86075			0	0	0.0426984	0	0	0	0	0	0	0	0	0	9.69668e+07	0	0	0	0	2.27387e-06	0	0	0	0
cyanazine	Cyanazine	Pesticides (air)	Emissions to air	Emissions to air, unspecified	4d9a8790-3ddd-11dd-9896-0050c2490048	16898.1	kg	FAOstat - Pesticide usage data	Eurostat - harvested areas	Literature	Method F	Pesticides			2.2766e-05										13210.8			0	0	0.384703	0	0	0	0	0	0	0	0	0	2.23237e+08	0	0	0	0	2.0487e-05	0	0	0	0
cyanazine	Cyanazine	Pesticides (soil)	Emissions to soil	Emissions to soil, unspecified	4d9a8790-3ddd-11dd-9895-0050c2490048	81049.8	kg	FAOstat - Pesticide usage data	Eurostat - harvested areas	Literature	Method F	Pesticides			9.31995e-06										21165.2			0	0	0.75538	0	0	0	0	0	0	0	0	0	1.71544e+09	0	0	0	0	4.02271e-05	0	0	0	0
cyclanilide	Cyclanilide	Pesticides (surface water)	Emissions to water	Emissions to water, unspecified	fe0acd60-3ddc-11dd-ae35-0050c2490048	30.65	kg	FAOstat - Pesticide usage data	Eurostat - harvested areas	Eurostat - organic farming areas	Method F														20834.6			0	0	0	0	0	0	0	0	0	0	0	0	638581	0	0	0	0	0	0	0	0	0
cyclanilide	Cyclanilide	Pesticides (air)	Emissions to air	Emissions to air, unspecified	fe0acd60-3ddc-11dd-aec6-0050c2490048	459.75	kg	FAOstat - Pesticide usage data	Eurostat - harvested areas	Literature	Method F														3838.93			0	0	0	0	0	0	0	0	0	0	0	0	1.76495e+06	0	0	0	0	0	0	0	0	0
cyclanilide	Cyclanilide	Pesticides (soil)	Emissions to soil	Emissions to soil, unspecified	fe0acd60-3ddc-11dd-aec5-0050c2490048	613	kg	FAOstat - Pesticide usage data	Eurostat - harvested areas	Eurostat - organic farming areas	Method F														4817.16			0	0	0	0	0	0	0	0	0	0	0	0	2.95292e+06	0	0	0	0	0	0	0	0	0
cycloheptane	cycloheptane		emissions to air	emissions to air, unspecified	ab63ea81-9cf3-4694-b842-8759da5fd68c	96207	kg	EMEP	E-PRTR	Literature	Method A	NMVOC breakdown estimates													0.000129484			0	0	0	0	0	0	0	0	0	0	0	0	12.4573	0	0	0	0	0	0	0	0	0
cyclohexane	cyclohexane		emissions to soil	emissions to soil, unspecified	f214fc4f-6555-11dd-ad8b-0800200c9a66	0	kg	Not applicable	Not applicable	Not applicable	Not applicable					1.77955e-09									0.125391			0	0	0	0	0	0	0	0	0	0	0	0	0	0	0	0	0	0	0	0	0	0
cyclohexane	cyclohexane		emissions to water	emissions to water, unspecified	fe0acd60-3ddc-11dd-a7e6-0050c2490048	0	kg	Not applicable	Not applicable	Not applicable	Not applicable					1.29995e-08									48.6887			0	0	0	0	0	0	0	0	0	0	0	0	0	0	0	0	0	0	0	0	0	0
cyclohexane	cyclohexane		emissions to air	emissions to air, unspecified	fe0acd60-3ddc-11dd-a7e0-0050c2490048	1.65007e+06	kg	EMEP	E-PRTR	Literature	Method A	NMVOC breakdown estimates				1.16135e-08			0.49						0.000500503			0	0	0	0.019163	0	0	808533	0	0	0	0	0	825.863	0	0	0	0	0	7.12651e-08	0	0	5.11507e-05
cyclohexanol	cyclohexanol		emissions to air	emissions to air, unspecified	fe0acd60-3ddc-11dd-ad10-0050c2490048	145485	kg	EMEP	E-PRTR	Literature	Method A	NMVOC breakdown estimates							0.875						0.351243			0	0	0	0	0	0	127299	0	0	0	0	0	51100.7	0	0	0	0	0	0	0	0	8.05343e-06
cyclohexanone	cyclohexanone		emissions to air	emissions to air, unspecified	fe0acd60-3ddc-11dd-ad14-0050c2490048	7.94928e+06	kg	EMEP	E-PRTR	Literature	Method A	NMVOC breakdown estimates				4.13619e-09			0.505						1.49647			0	0	0	0.0328797	0	0	4.01439e+06	0	0	0	0	0	1.18959e+07	0	0	0	0	0	1.22276e-07	0	0	0.000253965
cyclopentane	cyclopentane		emissions to air	emissions to air, unspecified	fe0acd60-3ddc-11dd-ad24-0050c2490048	9.49449e+07	kg	EMEP	E-PRTR	Literature	Method A	NMVOC breakdown estimates													0.000514028			0	0	0	0	0	0	0	0	0	0	0	0	48804.4	0	0	0	0	0	0	0	0	0
cycloxydim	Cycloxydim	Pesticides (surface water)	Emissions to water	Emissions to water, unspecified	541a05ac-8ee5-460d-8c52-da244bd9e5af	241.08	kg	Literature	Eurostat - harvested areas	Not applicable	Method F	Pesticides													291.6			0	0	0	0	0	0	0	0	0	0	0	0	70298.9	0	0	0	0	0	0	0	0	0
cycloxydim	Cycloxydim	Pesticides (air)	Emissions to air	Emissions to air, unspecified	a019e6c0-6e4e-4ea2-b3cb-f7c0024187c2	3616.2	kg	FAOstat - Pesticide usage data	Eurostat - harvested areas	Literature	Method F	Pesticides													3.10374			0	0	0	0	0	0	0	0	0	0	0	0	11223.8	0	0	0	0	0	0	0	0	0
cycloxydim	Cycloxydim	Pesticides (soil)	Emissions to soil	Emissions to soil, unspecified	1eab9bba-927b-46cb-aa39-9395680a47c5	17839.9	kg	FAOstat - Pesticide usage data	Eurostat - harvested areas	Literature	Method F	Pesticides													1.13914			0	0	0	0	0	0	0	0	0	0	0	0	20322.2	0	0	0	0	0	0	0	0	0
cyfluthrin	Cyfluthrin	Pesticides (surface water)	Emissions to water	Emissions to water, unspecified	4d9a8790-3ddd-11dd-9084-0050c2490048	72.9715	kg	Literature	Eurostat - harvested areas	Not applicable	Method F	Pesticides				1.54209e-05									4.90012e+08			0	0	0	0.00112528	0	0	0	0	0	0	0	0	3.57569e+10	0	0	0	0	0	4.18481e-09	0	0	0
cyfluthrin	Beta-Cyfluthrin	Pesticides (surface water)	Emissions to water	Emissions to water, unspecified	4d9a8790-3ddd-11dd-9084-0050c2490048	93.1734	kg	Literature	Eurostat - harvested areas	Not applicable	Method F	Pesticides				1.54209e-05									4.90012e+08			0	0	0	0.00143681	0	0	0	0	0	0	0	0	4.56561e+10	0	0	0	0	0	5.34336e-09	0	0	0
cyfluthrin	Cyfluthrin	Pesticides (air)	Emissions to air	Emissions to air, unspecified	08a91e70-3ddc-11dd-a040-0050c2490048	1094.57	kg	FAOstat - Pesticide usage data	Eurostat - harvested areas	Literature	Method F	Pesticides				6.1266e-06									1.12451e+07			0	0	0	0.00670601	0	0	0	0	0	0	0	0	1.23086e+10	0	0	0	0	0	2.49389e-08	0	0	0
cyfluthrin	Beta-Cyfluthrin	Pesticides (air)	Emissions to air	Emissions to air, unspecified	08a91e70-3ddc-11dd-a040-0050c2490048	1397.6	kg	FAOstat - Pesticide usage data	Eurostat - harvested areas	Literature	Method F	Pesticides				6.1266e-06									1.12451e+07			0	0	0	0.00856255	0	0	0	0	0	0	0	0	1.57162e+10	0	0	0	0	0	3.18432e-08	0	0	0
cyfluthrin	Cyfluthrin	Pesticides (soil)	Emissions to soil	Emissions to soil, unspecified	08a91e70-3ddc-11dd-a03f-0050c2490048	1459.43	kg	FAOstat - Pesticide usage data	Eurostat - harvested areas	Literature	Method F	Pesticides				2.19017e-08									677724			0	0	0	3.19641e-05	0	0	0	0	0	0	0	0	9.8909e+08	0	0	0	0	0	1.18871e-10	0	0	0
cyfluthrin	Beta-Cyfluthrin	Pesticides (soil)	Emissions to soil	Emissions to soil, unspecified	08a91e70-3ddc-11dd-a03f-0050c2490048	1863.47	kg	FAOstat - Pesticide usage data	Eurostat - harvested areas	Literature	Method F	Pesticides				2.19017e-08									677724			0	0	0	4.08132e-05	0	0	0	0	0	0	0	0	1.26292e+09	0	0	0	0	0	1.5178e-10	0	0	0
cyhalothrin	Lambda-cyhalothrin		emissions to water	emissions to water, unspecified	fe0acd60-3ddc-11dd-a8db-0050c2490048	0	kg	Not applicable	Not applicable	Not applicable	Not applicable														1.38991e+08			0	0	0	0	0	0	0	0	0	0	0	0	0	0	0	0	0	0	0	0	0	0
cyhalothrin	Lambda-Cyhalothrin	Pesticides (surface water)	Emissions to water	Emissions to water, unspecified	fe0acd60-3ddc-11dd-a8db-0050c2490048	75.9965	kg	Literature	Eurostat - harvested areas	Not applicable	Method F	Pesticides													1.38991e+08			0	0	0	0	0	0	0	0	0	0	0	0	1.05628e+10	0	0	0	0	0	0	0	0	0
cyhalothrin	Lambda-Cyhalothrin	Pesticides (air)	Emissions to air	Emissions to air, unspecified	4d9a8790-3ddd-11dd-8cf1-0050c2490048	1139.95	kg	FAOstat - Pesticide usage data	Eurostat - harvested areas	Literature	Method F	Pesticides				5.41013e-06									44096.2			0	0	0	0.00616726	0	0	0	0	0	0	0	0	5.02674e+07	0	0	0	0	0	2.29354e-08	0	0	0
cyhalothrin	Lambda-Cyhalothrin	Pesticides (soil)	Emissions to soil	Emissions to soil, unspecified	08a91e70-3ddc-11dd-9de8-0050c2490048	1519.93	kg	FAOstat - Pesticide usage data	Eurostat - harvested areas	Literature	Method F	Pesticides													133638			0	0	0	0	0	0	0	0	0	0	0	0	2.03121e+08	0	0	0	0	0	0	0	0	0
cyhexatin	Cyhexatin	Pesticides (surface water)	Emissions to water	Emissions to water, unspecified	4d9a8790-3ddd-11dd-8cf9-0050c2490048	237.283	kg	FAOstat - Pesticide usage data	Eurostat - harvested areas	Eurostat - organic farming areas	Method F					0.00035118									376083			0	0	0	0.0833292	0	0	0	0	0	0	0	0	8.92383e+07	0	0	0	0	0	3.09893e-07	0	0	0
cyhexatin	Cyhexatin	Pesticides (air)	Emissions to air	Emissions to air, unspecified	08a91e70-3ddc-11dd-a0b1-0050c2490048	3559.25	kg	FAOstat - Pesticide usage data	Eurostat - harvested areas	Literature	Method F					7.08166e-06									3362.49			0	0	0	0.0252054	0	0	0	0	0	0	0	0	1.19679e+07	0	0	0	0	0	9.37362e-08	0	0	0
cyhexatin	Cyhexatin	Pesticides (soil)	Emissions to soil	Emissions to soil, unspecified	08a91e70-3ddc-11dd-a0b0-0050c2490048	4745.67	kg	FAOstat - Pesticide usage data	Eurostat - harvested areas	Eurostat - organic farming areas	Method F					4.47509e-08									47.8709			0	0	0	0.000212373	0	0	0	0	0	0	0	0	227179	0	0	0	0	0	7.89792e-10	0	0	0
cymoxanil	Cymoxanil	Pesticides (surface water)	Emissions to water	Emissions to water, unspecified	4d9a8790-3ddd-11dd-8d04-0050c2490048	1263.89	kg	Literature	Eurostat - harvested areas	Not applicable	Method F	Pesticides													10890.9			0	0	0	0	0	0	0	0	0	0	0	0	1.37649e+07	0	0	0	0	0	0	0	0	0
cymoxanil	Cymoxanil	Pesticides (air)	Emissions to air	Emissions to air, unspecified	4d9a8790-3ddd-11dd-8cfe-0050c2490048	18958.4	kg	FAOstat - Pesticide usage data	Eurostat - harvested areas	Literature	Method F	Pesticides													1050.35			0	0	0	0	0	0	0	0	0	0	0	0	1.9913e+07	0	0	0	0	0	0	0	0	0
cymoxanil	Cymoxanil	Pesticides (soil)	Emissions to soil	Emissions to soil, unspecified	4d9a8790-3ddd-11dd-8cfd-0050c2490048	25277.9	kg	FAOstat - Pesticide usage data	Eurostat - harvested areas	Literature	Method F	Pesticides													1274.35			0	0	0	0	0	0	0	0	0	0	0	0	3.22129e+07	0	0	0	0	0	0	0	0	0
cypermethrin	Cypermethrin		emissions to water	emissions to water, unspecified	08a91e70-3ddc-11dd-940b-0050c2490048	0	kg	Not applicable	Not applicable	Not applicable	Not applicable					4.40792e-06									5.04086e+07			0	0	0	0	0	0	0	0	0	0	0	0	0	0	0	0	0	0	0	0	0	0
cypermethrin	Zeta-cypermethrin	Pesticides (surface water)	Emissions to water	Emissions to water, unspecified	08a91e70-3ddc-11dd-940b-0050c2490048	72.9715	kg	Literature	Eurostat - harvested areas	Not applicable	Method F	Pesticides				4.40792e-06									5.04086e+07			0	0	0	0.000321652	0	0	0	0	0	0	0	0	3.67839e+09	0	0	0	0	0	1.19619e-09	0	0	0
cypermethrin	Cypermethrin	Pesticides (surface water)	Emissions to water	Emissions to water, unspecified	08a91e70-3ddc-11dd-940b-0050c2490048	110.371	kg	Literature	Eurostat - harvested areas	Not applicable	Method F	Pesticides				4.40792e-06									5.04086e+07			0	0	0	0.000486509	0	0	0	0	0	0	0	0	5.56368e+09	0	0	0	0	0	1.80927e-09	0	0	0
cypermethrin	Zeta-cypermethrin	Pesticides (air)	Emissions to air	Emissions to air, unspecified	fe0acd60-3ddc-11dd-ad74-0050c2490048	1094.57	kg	FAOstat - Pesticide usage data	Eurostat - harvested areas	Literature	Method F	Pesticides				2.63248e-06									683746			0	0	0	0.00288144	0	0	0	0	0	0	0	0	7.48409e+08	0	0	0	0	0	1.07158e-08	0	0	0
cypermethrin	Zeta-cypermethrin	Pesticides (soil)	Emissions to soil	Emissions to soil, unspecified	fe0acd60-3ddc-11dd-ad73-0050c2490048	1459.43	kg	FAOstat - Pesticide usage data	Eurostat - harvested areas	Literature	Method F	Pesticides				9.91691e-09									70127.4			0	0	0	1.4473e-05	0	0	0	0	0	0	0	0	1.02346e+08	0	0	0	0	0	5.38237e-11	0	0	0
cypermethrin	Cypermethrin	Pesticides (air)	Emissions to air	Emissions to air, unspecified	fe0acd60-3ddc-11dd-ad74-0050c2490048	1655.57	kg	FAOstat - Pesticide usage data	Eurostat - harvested areas	Literature	Method F	Pesticides				2.63248e-06									683746			0	0	0	0.00435826	0	0	0	0	0	0	0	0	1.13199e+09	0	0	0	0	0	1.62079e-08	0	0	0
cypermethrin	Cypermethrin	Pesticides (soil)	Emissions to soil	Emissions to soil, unspecified	fe0acd60-3ddc-11dd-ad73-0050c2490048	2207.43	kg	FAOstat - Pesticide usage data	Eurostat - harvested areas	Literature	Method F	Pesticides				9.91691e-09									70127.4			0	0	0	2.18909e-05	0	0	0	0	0	0	0	0	1.54801e+08	0	0	0	0	0	8.14099e-11	0	0	0
cyproconazole	Cyproconazole	Pesticides (surface water)	Emissions to water	Emissions to water, unspecified	4d9a8790-3ddd-11dd-8d0d-0050c2490048	1480.68	kg	Literature	Eurostat - harvested areas	Not applicable	Method F	Pesticides													4566.42			0	0	0	0	0	0	0	0	0	0	0	0	6.76139e+06	0	0	0	0	0	0	0	0	0
cyproconazole	Cyproconazole	Pesticides (air)	Emissions to air	Emissions to air, unspecified	0e9ad042-806c-4972-b36c-b700e3628954	22210.1	kg	FAOstat - Pesticide usage data	Eurostat - harvested areas	Literature	Method F	Pesticides													269.192			0	0	0	0	0	0	0	0	0	0	0	0	5.9788e+06	0	0	0	0	0	0	0	0	0
cyproconazole	Cyproconazole	Pesticides (soil)	Emissions to soil	Emissions to soil, unspecified	0677fdf9-fefc-4b1f-887c-dff0da24c670	29613.5	kg	FAOstat - Pesticide usage data	Eurostat - harvested areas	Literature	Method F	Pesticides													242.168			0	0	0	0	0	0	0	0	0	0	0	0	7.17144e+06	0	0	0	0	0	0	0	0	0
cyprodinil	Cyprodinil	Pesticides (surface water)	Emissions to water	Emissions to water, unspecified	08a91e70-3ddc-11dd-9414-0050c2490048	380.995	kg	FAOstat - Pesticide usage data	Eurostat - harvested areas	Eurostat - organic farming areas	Method F														27899.1			0	0	0	0	0	0	0	0	0	0	0	0	1.06294e+07	0	0	0	0	0	0	0	0	0
cyprodinil	Cyprodinil	Pesticides (air)	Emissions to air	Emissions to air, unspecified	4d9a8790-3ddd-11dd-8d10-0050c2490048	5714.92	kg	FAOstat - Pesticide usage data	Eurostat - harvested areas	Literature	Method F														236.835			0	0	0	0	0	0	0	0	0	0	0	0	1.35349e+06	0	0	0	0	0	0	0	0	0
cyprodinil	Cyprodinil	Pesticides (soil)	Emissions to soil	Emissions to soil, unspecified	08a91e70-3ddc-11dd-9411-0050c2490048	7619.89	kg	FAOstat - Pesticide usage data	Eurostat - harvested areas	Eurostat - organic farming areas	Method F														280.319			0	0	0	0	0	0	0	0	0	0	0	0	2.136e+06	0	0	0	0	0	0	0	0	0
cyromazine	Cypromazine	Pesticides (surface water)	Emissions to water	Emissions to water, unspecified	fe0acd60-3ddc-11dd-acbd-0050c2490048	19.152	kg	FAOstat - Pesticide usage data	Eurostat - harvested areas	Eurostat - organic farming areas	Method F					7.91348e-06									3125.99			0	0	0	0.000151559	0	0	0	0	0	0	0	0	59868.9	0	0	0	0	0	5.63632e-10	0	0	0
cyromazine	Cypromazine	Pesticides (air)	Emissions to air	Emissions to air, unspecified	fe0acd60-3ddc-11dd-acb7-0050c2490048	287.28	kg	FAOstat - Pesticide usage data	Eurostat - harvested areas	Literature	Method F					5.70314e-06									378.974			0	0	0	0.0016384	0	0	0	0	0	0	0	0	108872	0	0	0	0	0	6.09303e-09	0	0	0
cyromazine	Cypromazine	Pesticides (soil)	Emissions to soil	Emissions to soil, unspecified	fe0acd60-3ddc-11dd-acb6-0050c2490048	383.04	kg	FAOstat - Pesticide usage data	Eurostat - harvested areas	Eurostat - organic farming areas	Method F					9.32877e-07									368.506			0	0	0	0.000357329	0	0	0	0	0	0	0	0	141152	0	0	0	0	0	1.32887e-09	0	0	0
dalapon	Dalapon	Pesticides (surface water)	Emissions to water	Emissions to water, unspecified	4d9a8790-3ddd-11dd-8d1c-0050c2490048	121.236	kg	FAOstat - Pesticide usage data	Eurostat - harvested areas	Eurostat - organic farming areas	Method F					1.29785e-06									108.509			0	0	0	0.000157347	0	0	0	0	0	0	0	0	13155.2	0	0	0	0	0	5.85156e-10	0	0	0
dalapon	Dalapon	Pesticides (air)	Emissions to air	Emissions to air, unspecified	4d9a8790-3ddd-11dd-8d16-0050c2490048	1818.55	kg	FAOstat - Pesticide usage data	Eurostat - harvested areas	Literature	Method F					1.13044e-06									33.8636			0	0	0	0.00205576	0	0	0	0	0	0	0	0	61582.5	0	0	0	0	0	7.64515e-09	0	0	0
dalapon	Dalapon	Pesticides (soil)	Emissions to soil	Emissions to soil, unspecified	4d9a8790-3ddd-11dd-8d15-0050c2490048	7113.48	kg	FAOstat - Pesticide usage data	Eurostat - harvested areas	Eurostat - organic farming areas	Method F					5.47875e-07									42.566			0	0	0	0.0038973	0	0	0	0	0	0	0	0	302793	0	0	0	0	0	1.44937e-08	0	0	0
dazomet	dazomet		emissions to air	emissions to air, unspecified	4d9a8790-3ddd-11dd-8d41-0050c2490048	0	kg	Not applicable	Not applicable	Not applicable	Not applicable														1167.01			0	0	0	0	0	0	0	0	0	0	0	0	0	0	0	0	0	0	0	0	0	0
DDT	DDT	pesticide	emissions to soil	emissions to soil, unspecified	4d9a8790-3ddd-11dd-94da-0050c2490048	0	kg	E-PRTR	Not applicable	Not applicable	Method E				1.21306e-06	9.66756e-07									314.851			0	0	0	0	0	0	0	0	0	0	0	0	0	0	0	0	0	0	0	0	0	0
DDT	DDT		emissions to air	emissions to air, unspecified	4d9a8790-3ddd-11dd-94db-0050c2490048	0	kg	EMEP	E-PRTR	Not applicable	Method C	Toxic airborne emissions			5.53718e-05	4.41289e-05									5816.56			0	0	0	0	0	0	0	0	0	0	0	0	0	0	0	0	0	0	0	0	0	0
DDT	DDT	Industrial releases	emissions to water	emissions to water, unspecified	4d9a8790-3ddd-11dd-94e1-0050c2490048	231.948	kg	E-PRTR	EUROSTAT - economic data	Not applicable	Method D1	Toxic waterborne emissions			0.000533316	0.000425029									278319			0	0	0.123701	0.0985846	0	0	0	0	0	0	0	0	6.45554e+07	0	0	0	0	6.58762e-06	3.66626e-07	0	0	0
decane	decane		emissions to soil	emissions to soil, unspecified	08a91e70-3ddc-11dd-9807-0050c2490048	0	kg	Not applicable	Not applicable	Not applicable	Not applicable														0.135568			0	0	0	0	0	0	0	0	0	0	0	0	0	0	0	0	0	0	0	0	0	0
decane	decane		emissions to water	emissions to water, unspecified	08a91e70-3ddc-11dd-980a-0050c2490048	0	kg	Not applicable	Not applicable	Not applicable	Not applicable														1253.33			0	0	0	0	0	0	0	0	0	0	0	0	0	0	0	0	0	0	0	0	0	0
decane	decanes		emissions to air	emissions to air, unspecified	08a91e70-3ddc-11dd-929d-0050c2490048	3.27593e+06	kg	EMEP	E-PRTR	Literature	Method A	NMVOC breakdown estimates							0.649						0.00195506			0	0	0	0	0	0	2.12608e+06	0	0	0	0	0	6404.63	0	0	0	0	0	0	0	0	0.000134504
decane	n-decane		emissions to air	emissions to air, unspecified	08a91e70-3ddc-11dd-929d-0050c2490048	9.01111e+07	kg	EMEP	E-PRTR	Literature	Method A	NMVOC breakdown estimates							0.649						0.00195506			0	0	0	0	0	0	5.84821e+07	0	0	0	0	0	176172	0	0	0	0	0	0	0	0	0.00369979
deltamethrin	Deltamethrin	Pesticides (surface water)	Emissions to water	Emissions to water, unspecified	4d9a8790-3ddd-11dd-938f-0050c2490048	72.9715	kg	Literature	Eurostat - harvested areas	Not applicable	Method F	Pesticides				5.9794e-06									2.48227e+06			0	0	0	0.000436325	0	0	0	0	0	0	0	0	1.81135e+08	0	0	0	0	0	1.62265e-09	0	0	0
deltamethrin	Deltamethrin	Pesticides (air)	Emissions to air	Emissions to air, unspecified	4d9a8790-3ddd-11dd-9389-0050c2490048	1094.57	kg	FAOstat - Pesticide usage data	Eurostat - harvested areas	Literature	Method F	Pesticides				2.43211e-06									18270.9			0	0	0	0.00266212	0	0	0	0	0	0	0	0	1.99988e+07	0	0	0	0	0	9.90016e-09	0	0	0
deltamethrin	Deltamethrin	Pesticides (soil)	Emissions to soil	Emissions to soil, unspecified	08a91e70-3ddc-11dd-92a2-0050c2490048	1459.43	kg	FAOstat - Pesticide usage data	Eurostat - harvested areas	Literature	Method F	Pesticides				1.79562e-08									1409.81			0	0	0	2.62058e-05	0	0	0	0	0	0	0	0	2.05752e+06	0	0	0	0	0	9.74566e-11	0	0	0
demeton-S-methyl	Demeton-S-methyl	Pesticides (surface water)	Emissions to water	Emissions to water, unspecified	a33ad70a-69d0-4f53-be76-eaf2bc07defa	578.864	kg	Literature	Eurostat - harvested areas	Not applicable	Method F	Pesticides				0.000166273									580.497			0	0	0	0.0962495	0	0	0	0	0	0	0	0	336029	0	0	0	0	0	3.57942e-07	0	0	0
demeton-S-methyl	Demeton-S-methyl	Pesticides (air)	Emissions to air	Emissions to air, unspecified	358a5371-e1d1-4aa8-a64c-8bd2e094d96e	8682.96	kg	FAOstat - Pesticide usage data	Eurostat - harvested areas	Literature	Method F	Pesticides				6.54979e-05									17.9655			0	0	0	0.568715	0	0	0	0	0	0	0	0	155994	0	0	0	0	0	2.11499e-06	0	0	0
demeton-S-methyl	Demeton-S-methyl	Pesticides (soil)	Emissions to soil	Emissions to soil, unspecified	cd39f82f-d75e-4596-89f2-bd3cc93c061c	11577.3	kg	FAOstat - Pesticide usage data	Eurostat - harvested areas	Literature	Method F	Pesticides				2.43273e-05									83.9291			0	0	0	0.281644	0	0	0	0	0	0	0	0	971670	0	0	0	0	0	1.0474e-06	0	0	0
demeton-s-methyl sulfoxide	Oxydemeton-methyl	Pesticides (surface water)	Emissions to water	Emissions to water, unspecified	fe0acd60-3ddc-11dd-ac41-0050c2490048	578.864	kg	Literature	Eurostat - harvested areas	Not applicable	Method F	Pesticides													6009.71			0	0	0	0	0	0	0	0	0	0	0	0	3.4788e+06	0	0	0	0	0	0	0	0	0
demeton-s-methyl sulfoxide	Oxydemeton-methyl	Pesticides (air)	Emissions to air	Emissions to air, unspecified	08a91e70-3ddc-11dd-92ae-0050c2490048	8682.96	kg	FAOstat - Pesticide usage data	Eurostat - harvested areas	Literature	Method F	Pesticides													184.694			0	0	0	0	0	0	0	0	0	0	0	0	1.60369e+06	0	0	0	0	0	0	0	0	0
demeton-s-methyl sulfoxide	Oxydemeton-methyl	Pesticides (soil)	Emissions to soil	Emissions to soil, unspecified	08a91e70-3ddc-11dd-92ad-0050c2490048	11577.3	kg	FAOstat - Pesticide usage data	Eurostat - harvested areas	Literature	Method F	Pesticides													1425.35			0	0	0	0	0	0	0	0	0	0	0	0	1.65016e+07	0	0	0	0	0	0	0	0	0
desmedipham	Desmedipham	Pesticides (surface water)	Emissions to water	Emissions to water, unspecified	fe0acd60-3ddc-11dd-af3c-0050c2490048	1456.2	kg	Literature	Eurostat - harvested areas	Not applicable	Method F	Pesticides													84900.5			0	0	0	0	0	0	0	0	0	0	0	0	1.23632e+08	0	0	0	0	0	0	0	0	0
desmedipham	Desmedipham	Pesticides (air)	Emissions to air	Emissions to air, unspecified	08a91e70-3ddc-11dd-9e1c-0050c2490048	21842.9	kg	FAOstat - Pesticide usage data	Eurostat - harvested areas	Literature	Method F	Pesticides													1054.76			0	0	0	0	0	0	0	0	0	0	0	0	2.30391e+07	0	0	0	0	0	0	0	0	0
desmedipham	Desmedipham	Pesticides (soil)	Emissions to soil	Emissions to soil, unspecified	fe0acd60-3ddc-11dd-ac45-0050c2490048	107102	kg	FAOstat - Pesticide usage data	Eurostat - harvested areas	Literature	Method F	Pesticides													1092.54			0	0	0	0	0	0	0	0	0	0	0	0	1.17013e+08	0	0	0	0	0	0	0	0	0
desmetrin	Desmetryn	Pesticides (surface water)	Emissions to water	Emissions to water, unspecified	fe0acd60-3ddc-11dd-af81-0050c2490048	54.17	kg	FAOstat - Pesticide usage data	Eurostat - harvested areas	Eurostat - organic farming areas	Method F														19689.9			0	0	0	0	0	0	0	0	0	0	0	0	1.0666e+06	0	0	0	0	0	0	0	0	0
desmetrin	Desmetryn	Pesticides (air)	Emissions to air	Emissions to air, unspecified	fe0acd60-3ddc-11dd-af41-0050c2490048	812.55	kg	FAOstat - Pesticide usage data	Eurostat - harvested areas	Literature	Method F														855.004			0	0	0	0	0	0	0	0	0	0	0	0	694734	0	0	0	0	0	0	0	0	0
desmetrin	Desmetryn	Pesticides (soil)	Emissions to soil	Emissions to soil, unspecified	fe0acd60-3ddc-11dd-af40-0050c2490048	4008.58	kg	FAOstat - Pesticide usage data	Eurostat - harvested areas	Eurostat - organic farming areas	Method F														2052.84			0	0	0	0	0	0	0	0	0	0	0	0	8.22899e+06	0	0	0	0	0	0	0	0	0
dialifos	Dialifos	Pesticides (surface water)	Emissions to water	Emissions to water, unspecified	707dc6a0-071b-47fe-b517-473edb2227d1	578.864	kg	Literature	Eurostat - harvested areas	Not applicable	Method F	Pesticides				0.00184393									14871.8			0	0	0	1.06738	0	0	0	0	0	0	0	0	8.60872e+06	0	0	0	0	0	3.96948e-06	0	0	0
dialifos	Dialifos	Pesticides (air)	Emissions to air	Emissions to air, unspecified	b28724b5-1ef9-4a7c-a4f6-6e0926d5f207	8682.96	kg	FAOstat - Pesticide usage data	Eurostat - harvested areas	Literature	Method F	Pesticides				4.07492e-05									175.825			0	0	0	0.353824	0	0	0	0	0	0	0	0	1.52668e+06	0	0	0	0	0	1.31583e-06	0	0	0
dialifos	Dialifos	Pesticides (soil)	Emissions to soil	Emissions to soil, unspecified	2b74d77a-fff0-4b9b-8efc-837b2f20a8bd	11577.3	kg	FAOstat - Pesticide usage data	Eurostat - harvested areas	Literature	Method F	Pesticides				0.000333344									2679.65			0	0	0	3.85922	0	0	0	0	0	0	0	0	3.10231e+07	0	0	0	0	0	1.4352e-05	0	0	0
diatomite	Diatomite (including siliceous earth and moler earth, kieselguhr and tripolite)		resource flows	Non-renewable material resources from ground	08a91e70-3ddc-11dd-97f4-0050c2490048	7.22135e+07	kg	Eurostat - Prodcom	Not applicable	Not applicable	Method K3	Time interpolation for resource depletion - metal ores and minerals																0	0	0	0	0	0	0	0	0	0	0	0	0	0	0	0	0	0	0	0	0	0
diazinon	Diazinon	Pesticides (surface water)	Emissions to water	Emissions to water, unspecified	4d9a8790-3ddd-11dd-96da-0050c2490048	829.121	kg	Literature	Eurostat - harvested areas	Not applicable	Method F	Pesticides				0.000162171									185625			0	0	0	0.134459	0	0	0	0	0	0	0	0	1.53906e+08	0	0	0	0	0	5.0004e-07	0	0	0
diazinon	Diazinon	Pesticides (air)	Emissions to air	Emissions to air, unspecified	fe0acd60-3ddc-11dd-af86-0050c2490048	12436.8	kg	FAOstat - Pesticide usage data	Eurostat - harvested areas	Literature	Method F	Pesticides				1.9638e-05									1973.08			0	0	0	0.244234	0	0	0	0	0	0	0	0	2.45389e+07	0	0	0	0	0	9.08282e-07	0	0	0
diazinon	Diazinon	Pesticides (soil)	Emissions to soil	Emissions to soil, unspecified	fe0acd60-3ddc-11dd-af85-0050c2490048	16582.4	kg	FAOstat - Pesticide usage data	Eurostat - harvested areas	Literature	Method F	Pesticides				5.36662e-06									6021.47			0	0	0	0.0889916	0	0	0	0	0	0	0	0	9.98505e+07	0	0	0	0	0	3.3095e-07	0	0	0
dibenz[a,h]anthracene	dibenz[a,h]anthracene		emissions to soil	emissions to soil, unspecified	08a91e70-3ddc-11dd-92b0-0050c2490048	0	kg	Not applicable	Not applicable	Not applicable	Not applicable				5.057e-09										0.472228			0	0	0	0	0	0	0	0	0	0	0	0	0	0	0	0	0	0	0	0	0	0
dibenz[a,h]anthracene	dibenz[a,h]anthracene		emissions to water	emissions to water, unspecified	4d9a8790-3ddd-11dd-97f1-0050c2490048	0	kg	Not applicable	Not applicable	Not applicable	Not applicable				3.05671e-05										2922.88			0	0	0	0	0	0	0	0	0	0	0	0	0	0	0	0	0	0	0	0	0	0
dibutyl adipate	dibutyladipat		emissions to air	emissions to air, unspecified	7de79b49-dfa8-4f37-964e-38d3982ebad4	2229.78	kg	EMEP	E-PRTR	Literature	Method A	NMVOC breakdown estimates													1.70163			0	0	0	0	0	0	0	0	0	0	0	0	3794.25	0	0	0	0	0	0	0	0	0
dicamba	Dicamba	Pesticides (surface water)	Emissions to water	Emissions to water, unspecified	4d9a8790-3ddd-11dd-982a-0050c2490048	1458.91	kg	FAOstat - Pesticide usage data	Eurostat - harvested areas	Eurostat - organic farming areas	Method F					2.10046e-06									1891			0	0	0	0.00306437	0	0	0	0	0	0	0	0	2.75879e+06	0	0	0	0	0	1.13961e-08	0	0	0
dicamba	Dicamba	Pesticides (air)	Emissions to air	Emissions to air, unspecified	fe0acd60-3ddc-11dd-a984-0050c2490048	21883.6	kg	FAOstat - Pesticide usage data	Eurostat - harvested areas	Literature	Method F					1.83473e-06									344.727			0	0	0	0.0401505	0	0	0	0	0	0	0	0	7.54385e+06	0	0	0	0	0	1.49316e-07	0	0	0
dicamba	Dicamba	Pesticides (soil)	Emissions to soil	Emissions to soil, unspecified	fe0acd60-3ddc-11dd-a983-0050c2490048	107959	kg	FAOstat - Pesticide usage data	Eurostat - harvested areas	Eurostat - organic farming areas	Method F					5.31381e-07									476.076			0	0	0	0.0573673	0	0	0	0	0	0	0	0	5.13967e+07	0	0	0	0	0	2.13343e-07	0	0	0
dichlobenil	Dichlobenil	Pesticides (surface water)	Emissions to water	Emissions to water, unspecified	4d9a8790-3ddd-11dd-8e97-0050c2490048	1425.88	kg	Literature	Eurostat - harvested areas	Not applicable	Method F	Pesticides													5265.62			0	0	0	0	0	0	0	0	0	0	0	0	7.50812e+06	0	0	0	0	0	0	0	0	0
dichlobenil	Dichlobenil	Pesticides (air)	Emissions to air	Emissions to air, unspecified	4d9a8790-3ddd-11dd-8e91-0050c2490048	21388.1	kg	FAOstat - Pesticide usage data	Eurostat - harvested areas	Literature	Method F	Pesticides													333.233			0	0	0	0	0	0	0	0	0	0	0	0	7.12724e+06	0	0	0	0	0	0	0	0	0
dichlobenil	Dichlobenil	Pesticides (soil)	Emissions to soil	Emissions to soil, unspecified	4d9a8790-3ddd-11dd-8e90-0050c2490048	105515	kg	FAOstat - Pesticide usage data	Eurostat - harvested areas	Literature	Method F	Pesticides													295.591			0	0	0	0	0	0	0	0	0	0	0	0	3.11893e+07	0	0	0	0	0	0	0	0	0
dichlofluanid	Dichlofluanid	Pesticides (surface water)	Emissions to water	Emissions to water, unspecified	37a1d07c-70e0-431d-af49-1ddce64fcf34	156.848	kg	Literature	Eurostat - harvested areas	Not applicable	Method F	Pesticides				6.32406e-07									67709.5			0	0	0	9.91919e-05	0	0	0	0	0	0	0	0	1.06201e+07	0	0	0	0	0	3.68884e-10	0	0	0
dichlofluanid	Dichlofluanid	Pesticides (air)	Emissions to air	Emissions to air, unspecified	f5821b49-a1f1-4a71-8e35-fcd9a48235b3	2352.72	kg	FAOstat - Pesticide usage data	Eurostat - harvested areas	Literature	Method F	Pesticides				9.89321e-08									2664.81			0	0	0	0.00023276	0	0	0	0	0	0	0	0	6.26957e+06	0	0	0	0	0	8.6561e-10	0	0	0
dichlofluanid	Dichlofluanid	Pesticides (soil)	Emissions to soil	Emissions to soil, unspecified	0f5a2773-f32c-4759-ba95-1d8365e6df8d	3136.97	kg	FAOstat - Pesticide usage data	Eurostat - harvested areas	Literature	Method F	Pesticides				4.35043e-08									4596.97			0	0	0	0.000136471	0	0	0	0	0	0	0	0	1.44205e+07	0	0	0	0	0	5.07523e-10	0	0	0
dichloroethane	dichloroethane	Industrial releases	emissions to soil	emissions to soil, unspecified	6da5bfe5-29b4-4952-ac45-1e0e96322d11	0	kg	Not applicable	Not applicable	Not applicable	Not applicable														0.716888			0	0	0	0	0	0	0	0	0	0	0	0	0	0	0	0	0	0	0	0	0	0
dichloroethane	dichloroethane		emissions to water	emissions to water, unspecified	8c2bf1a0-8969-4f51-8a9f-9ce0026700c1	0	kg	Not applicable	Not applicable	Not applicable	Not applicable														9.13814			0	0	0	0	0	0	0	0	0	0	0	0	0	0	0	0	0	0	0	0	0	0
dichloromethane	Dichloromethane (DCM)	Industrial releases	emissions to soil	emissions to soil, unspecified	08a91e70-3ddc-11dd-9617-0050c2490048	0	kg	E-PRTR	Not applicable	Not applicable	Method E				3.90735e-08	4.51958e-07									0.826658			0	0	0	0	0	0	0	0	0	0	0	0	0	0	0	0	0	0	0	0	0	0
dichloromethane	Dichloromethane (DCM)	Industrial releases	emissions to water	emissions to water, unspecified	fe0acd60-3ddc-11dd-9efb-0050c2490048	29302.6	kg	E-PRTR	EUROSTAT - economic data	Not applicable	Method D1	Toxic waterborne emissions	8.7		6.82317e-08	7.00035e-07									14.6086			254932	0	0.00199936	0.0205128	0	0	0	0	0	0	0	0	428070	0	0	5.54149e-08	0	1.06475e-07	7.6285e-08	0	0	0
dichloromethane	Dichloromethane	Non-industrial releases	emissions to water	emissions to water, unspecified	fe0acd60-3ddc-11dd-9efb-0050c2490048	29721.7	kg	Waterbase	Eurostat - WWTP-connection stats	Not applicable	Method D2	Toxic waterborne emissions	8.7		6.82317e-08	7.00035e-07									14.6086			258579	0	0.00202797	0.0208062	0	0	0	0	0	0	0	0	434194	0	0	5.62077e-08	0	1.07998e-07	7.73763e-08	0	0	0
dichloromethane	methylenchloride		emissions to air	emissions to air, unspecified	08a91e70-3ddc-11dd-9618-0050c2490048	1.18426e+07	kg	EMEP	E-PRTR	Literature	Method A	NMVOC breakdown estimates	8.7		6.66565e-08	7.7984e-07			0.115						0.0969649			1.03031e+08	0	0.789387	9.23534	0	0	1.3619e+06	0	0	0	0	0	1.14832e+06	0	0	2.23959e-05	0	4.20382e-05	3.43453e-05	0	0	8.61588e-05
dichloro-N-[(dimethylamino)sulphonyl]fluoro-N-(p-tolyl)methanesulphenamide	Tolylfluanid	Pesticides (surface water)	Emissions to water	Emissions to water, unspecified	097dd44b-0859-46aa-8a16-9ef7f27a9c19	3811.72	kg	Literature	Eurostat - harvested areas	Not applicable	Method F	Pesticides													367707			0	0	0	0	0	0	0	0	0	0	0	0	1.40159e+09	0	0	0	0	0	0	0	0	0
dichloro-N-[(dimethylamino)sulphonyl]fluoro-N-(p-tolyl)methanesulphenamide	Tolylfluanid	Pesticides (air)	Emissions to air	Emissions to air, unspecified	a33d3067-afdb-4e2f-a585-62eeb28a52b7	57175.8	kg	FAOstat - Pesticide usage data	Eurostat - harvested areas	Literature	Method F	Pesticides													5696.67			0	0	0	0	0	0	0	0	0	0	0	0	3.25711e+08	0	0	0	0	0	0	0	0	0
dichloro-N-[(dimethylamino)sulphonyl]fluoro-N-(p-tolyl)methanesulphenamide	Tolylfluanid	Pesticides (soil)	Emissions to soil	Emissions to soil, unspecified	697f1037-d086-44dd-8250-d9df909ee74c	76234.4	kg	FAOstat - Pesticide usage data	Eurostat - harvested areas	Literature	Method F	Pesticides													15771			0	0	0	0	0	0	0	0	0	0	0	0	1.20229e+09	0	0	0	0	0	0	0	0	0
dichloroprop	Dichlorprop	Pesticides (surface water)	Emissions to water	Emissions to water, unspecified	08a91e70-3ddc-11dd-92c9-0050c2490048	4086.83	kg	Literature	Eurostat - harvested areas	Not applicable	Method F	Pesticides													423.918			0	0	0	0	0	0	0	0	0	0	0	0	1.73248e+06	0	0	0	0	0	0	0	0	0
dichloroprop	Dichlorprop	Pesticides (air)	Emissions to air	Emissions to air, unspecified	08a91e70-3ddc-11dd-9648-0050c2490048	61302.4	kg	FAOstat - Pesticide usage data	Eurostat - harvested areas	Literature	Method F	Pesticides													42.7664			0	0	0	0	0	0	0	0	0	0	0	0	2.62168e+06	0	0	0	0	0	0	0	0	0
dichloroprop	Dichlorprop	Pesticides (soil)	Emissions to soil	Emissions to soil, unspecified	08a91e70-3ddc-11dd-9647-0050c2490048	291696	kg	FAOstat - Pesticide usage data	Eurostat - harvested areas	Literature	Method F	Pesticides													88.0219			0	0	0	0	0	0	0	0	0	0	0	0	2.56756e+07	0	0	0	0	0	0	0	0	0
dichlorvos	Dichlorvos	Pesticides (surface water)	Emissions to water	Emissions to water, unspecified	08a91e70-3ddc-11dd-9dd4-0050c2490048	578.864	kg	Literature	Eurostat - harvested areas	Not applicable	Method F	Pesticides			2.17526e-05	6.1596e-05									725854			0	0	0.0125918	0.0356557	0	0	0	0	0	0	0	0	4.20171e+08	0	0	0	0	6.70567e-07	1.326e-07	0	0	0
dichlorvos	Dichlorvos	Pesticides (air)	Emissions to air	Emissions to air, unspecified	08a91e70-3ddc-11dd-92ce-0050c2490048	8682.96	kg	FAOstat - Pesticide usage data	Eurostat - harvested areas	Literature	Method F	Pesticides			2.30965e-06	4.94684e-05									36144.7			0	0	0.0200546	0.429532	0	0	0	0	0	0	0	0	3.13843e+08	0	0	0	0	1.06799e-06	1.59738e-06	0	0	0
dichlorvos	Dichlorvos	Pesticides (soil)	Emissions to soil	Emissions to soil, unspecified	08a91e70-3ddc-11dd-92cd-0050c2490048	11577.3	kg	FAOstat - Pesticide usage data	Eurostat - harvested areas	Literature	Method F	Pesticides			4.25071e-06	1.27626e-05									135496			0	0	0.0492116	0.147757	0	0	0	0	0	0	0	0	1.56868e+09	0	0	0	0	2.62073e-06	5.49491e-07	0	0	0
dicofol	Dicofol	Pesticides (surface water)	Emissions to water	Emissions to water, unspecified	4d9a8790-3ddd-11dd-8ead-0050c2490048	1172.7	kg	Literature	Eurostat - harvested areas	Not applicable	Method F	Pesticides			0.000560892	0.00522248									484161			0	0	0.657756	6.12438	0	0	0	0	0	0	0	0	5.67774e+08	0	0	0	0	3.50283e-05	2.27759e-05	0	0	0
dicofol	Dicofol	Pesticides (air)	Emissions to air	Emissions to air, unspecified	4d9a8790-3ddd-11dd-8ea7-0050c2490048	17590.5	kg	FAOstat - Pesticide usage data	Eurostat - harvested areas	Literature	Method F	Pesticides			3.24465e-05	0.00030211									18478.4			0	0	0.570749	5.31426	0	0	0	0	0	0	0	0	3.25043e+08	0	0	0	0	3.03948e-05	1.97632e-05	0	0	0
dicofol	Dicofol	Pesticides (soil)	Emissions to soil	Emissions to soil, unspecified	4d9a8790-3ddd-11dd-8ea6-0050c2490048	23453.9	kg	FAOstat - Pesticide usage data	Eurostat - harvested areas	Literature	Method F	Pesticides			1.08211e-05	0.000100755									9193.94			0	0	0.253797	2.36311	0	0	0	0	0	0	0	0	2.15634e+08	0	0	0	0	1.35158e-05	8.78816e-06	0	0	0
dieldrin	Dieldrin	Industrial releases	emissions to soil	emissions to soil, unspecified	08a91e70-3ddc-11dd-a292-0050c2490048	0	kg	E-PRTR	Not applicable	Not applicable	Method E				0.000121869	0.000276804									5164.91			0	0	0	0	0	0	0	0	0	0	0	0	0	0	0	0	0	0	0	0	0	0
dieldrin	Dieldrin	Industrial releases	emissions to air	emissions to air, unspecified	4d9a8790-3ddd-11dd-8ce5-0050c2490048	0	kg	EMEP	E-PRTR	Not applicable	Method C	Toxic airborne emissions			0.000486831	0.00110575									6803			0	0	0	0	0	0	0	0	0	0	0	0	0	0	0	0	0	0	0	0	0	0
dieldrin	Dieldrin	Non-industrial releases	emissions to water	emissions to water, unspecified	4d9a8790-3ddd-11dd-8ceb-0050c2490048	0.063783	kg	Waterbase	Eurostat - WWTP-connection stats	Not applicable	Method D2	Toxic waterborne emissions			0.009516	0.0216139									614410			0	0	0.000606959	0.0013786	0	0	0	0	0	0	0	0	39188.9	0	0	0	0	3.23231e-08	5.12687e-09	0	0	0
dieldrin	Dieldrin	Industrial releases	emissions to water	emissions to water, unspecified	4d9a8790-3ddd-11dd-8ceb-0050c2490048	637.553	kg	E-PRTR	EUROSTAT - economic data	Not applicable	Method D1	Toxic waterborne emissions			0.009516	0.0216139									614410			0	0	6.06695	13.78	0	0	0	0	0	0	0	0	3.91719e+08	0	0	0	0	0.000323091	5.12464e-05	0	0	0
diethylamine	diethylamine		emissions to soil	emissions to soil, unspecified	f214fc37-6555-11dd-ad8b-0800200c9a66	0	kg	Not applicable	Not applicable	Not applicable	Not applicable														7.13335			0	0	0	0	0	0	0	0	0	0	0	0	0	0	0	0	0	0	0	0	0	0
diethylamine	diethylamine		emissions to water	emissions to water, unspecified	f214fc38-6555-11dd-ad8b-0800200c9a66	0	kg	Not applicable	Not applicable	Not applicable	Not applicable														65.4674			0	0	0	0	0	0	0	0	0	0	0	0	0	0	0	0	0	0	0	0	0	0
difenoconazole	Difenoconazole	Pesticides (surface water)	Emissions to water	Emissions to water, unspecified	08a91e70-3ddc-11dd-9e42-0050c2490048	1481.15	kg	Literature	Eurostat - harvested areas	Not applicable	Method F	Pesticides													119053			0	0	0	0	0	0	0	0	0	0	0	0	1.76335e+08	0	0	0	0	0	0	0	0	0
difenoconazole	Difenoconazole	Pesticides (air)	Emissions to air	Emissions to air, unspecified	4d9a8790-3ddd-11dd-8eed-0050c2490048	22217.3	kg	FAOstat - Pesticide usage data	Eurostat - harvested areas	Literature	Method F	Pesticides													5047.08			0	0	0	0	0	0	0	0	0	0	0	0	1.12133e+08	0	0	0	0	0	0	0	0	0
difenoconazole	Difenoconazole	Pesticides (soil)	Emissions to soil	Emissions to soil, unspecified	4d9a8790-3ddd-11dd-9135-0050c2490048	29623.1	kg	FAOstat - Pesticide usage data	Eurostat - harvested areas	Literature	Method F	Pesticides													1921.73			0	0	0	0	0	0	0	0	0	0	0	0	5.69275e+07	0	0	0	0	0	0	0	0	0
difenoxuron	Difenoxuron	Pesticides (surface water)	Emissions to water	Emissions to water, unspecified	9c05e8c2-12ac-400b-800b-1bf25b9a4ac3	577.103	kg	Literature	Eurostat - harvested areas	Not applicable	Method F	Pesticides													10486.1			0	0	0	0	0	0	0	0	0	0	0	0	6.05155e+06	0	0	0	0	0	0	0	0	0
difenoxuron	Difenoxuron	Pesticides (air)	Emissions to air	Emissions to air, unspecified	ffeb120c-e703-4c0a-83ca-6aad4c3c1011	8656.55	kg	FAOstat - Pesticide usage data	Eurostat - harvested areas	Literature	Method F	Pesticides													180.935			0	0	0	0	0	0	0	0	0	0	0	0	1.56627e+06	0	0	0	0	0	0	0	0	0
difenoxuron	Difenoxuron	Pesticides (soil)	Emissions to soil	Emissions to soil, unspecified	63b5d3f3-6d50-41b2-97b0-b6b386925f70	39721.1	kg	FAOstat - Pesticide usage data	Eurostat - harvested areas	Literature	Method F	Pesticides													526.708			0	0	0	0	0	0	0	0	0	0	0	0	2.09214e+07	0	0	0	0	0	0	0	0	0
diflubenzuron	Diflubenzuron	Pesticides (surface water)	Emissions to water	Emissions to water, unspecified	08a91e70-3ddc-11dd-9ca2-0050c2490048	80.8764	kg	Literature	Eurostat - harvested areas	Not applicable	Method F	Pesticides				9.27635e-06									1.19764e+07			0	0	0	0.000750238	0	0	0	0	0	0	0	0	9.68605e+08	0	0	0	0	0	2.79006e-09	0	0	0
diflubenzuron	Diflubenzuron	Pesticides (air)	Emissions to air	Emissions to air, unspecified	08a91e70-3ddc-11dd-9c9c-0050c2490048	1213.15	kg	FAOstat - Pesticide usage data	Eurostat - harvested areas	Literature	Method F	Pesticides				1.69247e-06									281904			0	0	0	0.00205322	0	0	0	0	0	0	0	0	3.4199e+08	0	0	0	0	0	7.6357e-09	0	0	0
diflubenzuron	Diflubenzuron	Pesticides (soil)	Emissions to soil	Emissions to soil, unspecified	08a91e70-3ddc-11dd-9c9b-0050c2490048	1617.53	kg	FAOstat - Pesticide usage data	Eurostat - harvested areas	Literature	Method F	Pesticides				1.31791e-07									169738			0	0	0	0.000213176	0	0	0	0	0	0	0	0	2.74556e+08	0	0	0	0	0	7.92778e-10	0	0	0
diflufenican	Diflufenican	Pesticides (surface water)	Emissions to water	Emissions to water, unspecified	4d9a8790-3ddd-11dd-9037-0050c2490048	1225.48	kg	Literature	Eurostat - harvested areas	Not applicable	Method F	Pesticides													1246.91			0	0	0	0	0	0	0	0	0	0	0	0	1.52806e+06	0	0	0	0	0	0	0	0	0
diflufenican	Diflufenican	Pesticides (air)	Emissions to air	Emissions to air, unspecified	4d9a8790-3ddd-11dd-9031-0050c2490048	18382.2	kg	FAOstat - Pesticide usage data	Eurostat - harvested areas	Literature	Method F	Pesticides													38.56			0	0	0	0	0	0	0	0	0	0	0	0	708817	0	0	0	0	0	0	0	0	0
diflufenican	Diflufenican	Pesticides (soil)	Emissions to soil	Emissions to soil, unspecified	4d9a8790-3ddd-11dd-9030-0050c2490048	90329.3	kg	FAOstat - Pesticide usage data	Eurostat - harvested areas	Literature	Method F	Pesticides													5.52248			0	0	0	0	0	0	0	0	0	0	0	0	498842	0	0	0	0	0	0	0	0	0
diisopropyl 5-nitroisophthalate	Nitrothal-isopropyl	Pesticides (surface water)	Emissions to water	Emissions to water, unspecified	c760b279-5af1-480a-8aed-6097107f3ab5	241.451	kg	Literature	Eurostat - harvested areas	Not applicable	Method F	Pesticides													18442.4			0	0	0	0	0	0	0	0	0	0	0	0	4.45293e+06	0	0	0	0	0	0	0	0	0
diisopropyl 5-nitroisophthalate	Nitrothal-isopropyl	Pesticides (air)	Emissions to air	Emissions to air, unspecified	5b77e90f-03c5-415f-be80-ea85a0302dd6	3621.77	kg	FAOstat - Pesticide usage data	Eurostat - harvested areas	Literature	Method F	Pesticides													299.159			0	0	0	0	0	0	0	0	0	0	0	0	1.08348e+06	0	0	0	0	0	0	0	0	0
diisopropyl 5-nitroisophthalate	Nitrothal-isopropyl	Pesticides (soil)	Emissions to soil	Emissions to soil, unspecified	eb09897b-a047-4d98-b35e-ba4c7e0cc441	4829.02	kg	FAOstat - Pesticide usage data	Eurostat - harvested areas	Literature	Method F	Pesticides													800.644			0	0	0	0	0	0	0	0	0	0	0	0	3.86633e+06	0	0	0	0	0	0	0	0	0
dimethenamid	Dimethenamid	Pesticides (surface water)	Emissions to water	Emissions to water, unspecified	4d9a8790-3ddd-11dd-8f04-0050c2490048	2575.26	kg	Literature	Eurostat - harvested areas	Not applicable	Method F	Pesticides													140682			0	0	0	0	0	0	0	0	0	0	0	0	3.62293e+08	0	0	0	0	0	0	0	0	0
dimethenamid	Dimethenamid	Pesticides (air)	Emissions to air	Emissions to air, unspecified	4d9a8790-3ddd-11dd-8efe-0050c2490048	38628.9	kg	FAOstat - Pesticide usage data	Eurostat - harvested areas	Literature	Method F	Pesticides													3598.58			0	0	0	0	0	0	0	0	0	0	0	0	1.39009e+08	0	0	0	0	0	0	0	0	0
dimethenamid	Dimethenamid	Pesticides (soil)	Emissions to soil	Emissions to soil, unspecified	4d9a8790-3ddd-11dd-8efd-0050c2490048	190512	kg	FAOstat - Pesticide usage data	Eurostat - harvested areas	Literature	Method F	Pesticides													20486.6			0	0	0	0	0	0	0	0	0	0	0	0	3.90296e+09	0	0	0	0	0	0	0	0	0
dimethoate	Dimethoate	Pesticides (surface water)	Emissions to water	Emissions to water, unspecified	4d9a8790-3ddd-11dd-8f5f-0050c2490048	1343.97	kg	Literature	Eurostat - harvested areas	Not applicable	Method F	Pesticides				4.17003e-06									17925.7			0	0	0	0.00560442	0	0	0	0	0	0	0	0	2.40917e+07	0	0	0	0	0	2.08422e-08	0	0	0
dimethoate	Dimethoate	Pesticides (air)	Emissions to air	Emissions to air, unspecified	4d9a8790-3ddd-11dd-9b7e-0050c2490048	20159.6	kg	FAOstat - Pesticide usage data	Eurostat - harvested areas	Literature	Method F	Pesticides				1.45034e-06									565.367			0	0	0	0.0292382	0	0	0	0	0	0	0	0	1.13976e+07	0	0	0	0	0	1.08734e-07	0	0	0
dimethoate	Dimethoate	Pesticides (soil)	Emissions to soil	Emissions to soil, unspecified	4d9a8790-3ddd-11dd-9b7d-0050c2490048	26879.5	kg	FAOstat - Pesticide usage data	Eurostat - harvested areas	Literature	Method F	Pesticides				8.42567e-07									3621.6			0	0	0	0.0226478	0	0	0	0	0	0	0	0	9.73466e+07	0	0	0	0	0	8.42246e-08	0	0	0
dimethomorph	Dimethomorph	Pesticides (surface water)	Emissions to water	Emissions to water, unspecified	4d9a8790-3ddd-11dd-8f66-0050c2490048	4461.3	kg	Literature	Eurostat - harvested areas	Not applicable	Method F	Pesticides													2469.44			0	0	0	0	0	0	0	0	0	0	0	0	1.10169e+07	0	0	0	0	0	0	0	0	0
dimethomorph	Dimethomorph	Pesticides (air)	Emissions to air	Emissions to air, unspecified	08a91e70-3ddc-11dd-9e83-0050c2490048	66919.5	kg	FAOstat - Pesticide usage data	Eurostat - harvested areas	Literature	Method F	Pesticides													27.4493			0	0	0	0	0	0	0	0	0	0	0	0	1.8369e+06	0	0	0	0	0	0	0	0	0
dimethomorph	Dimethomorph	Pesticides (soil)	Emissions to soil	Emissions to soil, unspecified	4d9a8790-3ddd-11dd-8f63-0050c2490048	89226.1	kg	FAOstat - Pesticide usage data	Eurostat - harvested areas	Literature	Method F	Pesticides													14.0313			0	0	0	0	0	0	0	0	0	0	0	0	1.25196e+06	0	0	0	0	0	0	0	0	0
dimethyl sulfide	Dimethyl sulphide		emissions to air	emissions to air, unspecified	4d9a8790-3ddd-11dd-8e3b-0050c2490048	1.6034e+07	kg	EMEP	E-PRTR	Literature	Method A	NMVOC breakdown estimates													0.371906			0	0	0	0	0	0	0	0	0	0	0	0	5.96315e+06	0	0	0	0	0	0	0	0	0
dimethyldisulfide	Dimethyl disulphide		emissions to air	emissions to air, unspecified	fe0acd60-3ddc-11dd-ac1e-0050c2490048	1.42643e+07	kg	EMEP	E-PRTR	Not applicable	Method C	Toxic airborne emissions																0	0	0	0	0	0	0	0	0	0	0	0	0	0	0	0	0	0	0	0	0	0
dimethyltetrachloroterephthalate	Chlorthal	Pesticides (surface water)	Emissions to water	Emissions to water, unspecified	4d9a8790-3ddd-11dd-9875-0050c2490048	1286.66	kg	FAOstat - Pesticide usage data	Eurostat - harvested areas	Eurostat - organic farming areas	Method F	Pesticides				1.90525e-05									3567.72			0	0	0	0.0245141	0	0	0	0	0	0	0	0	4.59046e+06	0	0	0	0	0	9.11655e-08	0	0	0
dimethyltetrachloroterephthalate	Chlorthal	Pesticides (air)	Emissions to air	Emissions to air, unspecified	4d9a8790-3ddd-11dd-986f-0050c2490048	19300	kg	FAOstat - Pesticide usage data	Eurostat - harvested areas	Literature	Method F	Pesticides				2.63808e-05									152.891			0	0	0	0.509148	0	0	0	0	0	0	0	0	2.9508e+06	0	0	0	0	0	1.89347e-06	0	0	0
dimethyltetrachloroterephthalate	Chlorthal	Pesticides (soil)	Emissions to soil	Emissions to soil, unspecified	4d9a8790-3ddd-11dd-986e-0050c2490048	95213.2	kg	FAOstat - Pesticide usage data	Eurostat - harvested areas	Eurostat - organic farming areas	Method F	Pesticides				1.04359e-06									27.264			0	0	0	0.0993636	0	0	0	0	0	0	0	0	2.59589e+06	0	0	0	0	0	3.69523e-07	0	0	0
dinitramine	Dinitramine	Pesticides (surface water)	Emissions to water	Emissions to water, unspecified	6fed40c2-6c86-47d5-a843-b58587cfbd5a	1815.73	kg	Literature	Eurostat - harvested areas	Not applicable	Method F	Pesticides													58409			0	0	0	0	0	0	0	0	0	0	0	0	1.06055e+08	0	0	0	0	0	0	0	0	0
dinitramine	Dinitramine	Pesticides (air)	Emissions to air	Emissions to air, unspecified	984ed72a-1b6d-4918-aea9-fd14562b7dcd	27236	kg	FAOstat - Pesticide usage data	Eurostat - harvested areas	Literature	Method F	Pesticides													704.222			0	0	0	0	0	0	0	0	0	0	0	0	1.91802e+07	0	0	0	0	0	0	0	0	0
dinitramine	Dinitramine	Pesticides (soil)	Emissions to soil	Emissions to soil, unspecified	4d6a266e-84e1-4c5c-9b7e-304f7803c902	133163	kg	FAOstat - Pesticide usage data	Eurostat - harvested areas	Literature	Method F	Pesticides													1220.53			0	0	0	0	0	0	0	0	0	0	0	0	1.6253e+08	0	0	0	0	0	0	0	0	0
dinocap	Dinocap	Pesticides (surface water)	Emissions to water	Emissions to water, unspecified	c60607e2-1868-4196-9af4-b24f6dd67499	808.9	kg	FAOstat - Pesticide usage data	Eurostat - harvested areas	Eurostat - organic farming areas	Method F	Pesticides				3.63226e-06									338545			0	0	0	0.00293813	0	0	0	0	0	0	0	0	2.73849e+08	0	0	0	0	0	1.09266e-08	0	0	0
dinocap	Dinocap	Pesticides (air)	Emissions to air	Emissions to air, unspecified	a327ac44-7c3d-410f-9489-d10d43bde4f7	12133.5	kg	FAOstat - Pesticide usage data	Eurostat - harvested areas	Literature	Method F	Pesticides				2.44108e-06									7325.31			0	0	0	0.0296188	0	0	0	0	0	0	0	0	8.88817e+07	0	0	0	0	0	1.10149e-07	0	0	0
dinocap	Dinocap	Pesticides (soil)	Emissions to soil	Emissions to soil, unspecified	50ca1eff-ab32-44e6-b798-8537cba4e7ff	16178	kg	FAOstat - Pesticide usage data	Eurostat - harvested areas	Eurostat - organic farming areas	Method F	Pesticides				1.51027e-09									139.744			0	0	0	2.44332e-05	0	0	0	0	0	0	0	0	2.26077e+06	0	0	0	0	0	9.08643e-11	0	0	0
dinoterb	Dinoterb	Pesticides (surface water)	Emissions to water	Emissions to water, unspecified	08a91e70-3ddc-11dd-92ed-0050c2490048	121.236	kg	FAOstat - Pesticide usage data	Eurostat - harvested areas	Eurostat - organic farming areas	Method F	Pesticides													384683			0	0	0	0	0	0	0	0	0	0	0	0	4.66376e+07	0	0	0	0	0	0	0	0	0
dinoterb	Dinoterb	Pesticides (air)	Emissions to air	Emissions to air, unspecified	4d9a8790-3ddd-11dd-94f5-0050c2490048	1818.55	kg	FAOstat - Pesticide usage data	Eurostat - harvested areas	Literature	Method F	Pesticides													17084.1			0	0	0	0	0	0	0	0	0	0	0	0	3.10682e+07	0	0	0	0	0	0	0	0	0
dinoterb	Dinoterb	Pesticides (soil)	Emissions to soil	Emissions to soil, unspecified	4d9a8790-3ddd-11dd-94f4-0050c2490048	7113.48	kg	FAOstat - Pesticide usage data	Eurostat - harvested areas	Eurostat - organic farming areas	Method F	Pesticides													3807.92			0	0	0	0	0	0	0	0	0	0	0	0	2.70875e+07	0	0	0	0	0	0	0	0	0
diquat dibromide	Diquat	Pesticides (surface water)	Emissions to water	Emissions to water, unspecified	fe0acd60-3ddc-11dd-a597-0050c2490048	2407.42	kg	FAOstat - Pesticide usage data	Eurostat - harvested areas	Eurostat - organic farming areas	Method F	Pesticides				4.87777e-05									172129			0	0	0	0.117428	0	0	0	0	0	0	0	0	4.14385e+08	0	0	0	0	0	4.36703e-07	0	0	0
diquat dibromide	Diquat	Pesticides (air)	Emissions to air	Emissions to air, unspecified	fe0acd60-3ddc-11dd-a276-0050c2490048	36111.2	kg	FAOstat - Pesticide usage data	Eurostat - harvested areas	Literature	Method F	Pesticides				1.76616e-05									4283.47			0	0	0	0.637783	0	0	0	0	0	0	0	0	1.54681e+08	0	0	0	0	0	2.37185e-06	0	0	0
diquat dibromide	Diquat	Pesticides (soil)	Emissions to soil	Emissions to soil, unspecified	fe0acd60-3ddc-11dd-a275-0050c2490048	157841	kg	FAOstat - Pesticide usage data	Eurostat - harvested areas	Eurostat - organic farming areas	Method F	Pesticides				1.77763e-06									6272.97			0	0	0	0.280584	0	0	0	0	0	0	0	0	9.90135e+08	0	0	0	0	0	1.04346e-06	0	0	0
di-sec-octyl phthalate	di-sec-octyl phthalate		emissions to soil	emissions to soil, unspecified	08a91e70-3ddc-11dd-9b6d-0050c2490048	0	kg	Not applicable	Not applicable	Not applicable	Not applicable				1.92676e-11	2.68662e-10									0.0413949			0	0	0	0	0	0	0	0	0	0	0	0	0	0	0	0	0	0	0	0	0	0
di-sec-octyl phthalate	di-sec-octyl phthalate		emissions to water	emissions to water, unspecified	fe0acd60-3ddc-11dd-aeae-0050c2490048	0	kg	Not applicable	Not applicable	Not applicable	Not applicable				8.7639e-08	1.22201e-06									322.449			0	0	0	0	0	0	0	0	0	0	0	0	0	0	0	0	0	0	0	0	0	0
disulfoton	Disulfoton	Pesticides (surface water)	Emissions to water	Emissions to water, unspecified	fe0acd60-3ddc-11dd-a2f1-0050c2490048	578.864	kg	Literature	Eurostat - harvested areas	Not applicable	Method F	Pesticides				0.000295404									662695			0	0	0	0.170999	0	0	0	0	0	0	0	0	3.8361e+08	0	0	0	0	0	6.35926e-07	0	0	0
disulfoton	Disulfoton	Pesticides (air)	Emissions to air	Emissions to air, unspecified	fe0acd60-3ddc-11dd-a59c-0050c2490048	8682.96	kg	FAOstat - Pesticide usage data	Eurostat - harvested areas	Literature	Method F	Pesticides				1.83236e-05									2048.53			0	0	0	0.159103	0	0	0	0	0	0	0	0	1.77873e+07	0	0	0	0	0	5.91687e-07	0	0	0
disulfoton	Disulfoton	Pesticides (soil)	Emissions to soil	Emissions to soil, unspecified	fe0acd60-3ddc-11dd-a59b-0050c2490048	11577.3	kg	FAOstat - Pesticide usage data	Eurostat - harvested areas	Literature	Method F	Pesticides				3.61798e-06									7450.36			0	0	0	0.0418864	0	0	0	0	0	0	0	0	8.62548e+07	0	0	0	0	0	1.55771e-07	0	0	0
dithianon	Dithianon	Pesticides (surface water)	Emissions to water	Emissions to water, unspecified	b83d31ee-e4b8-47d2-941b-bb8672eeb6ff	2337.35	kg	Literature	Eurostat - harvested areas	Not applicable	Method F	Pesticides				5.23994e-06									41016.5			0	0	0	0.0122476	0	0	0	0	0	0	0	0	9.58698e+07	0	0	0	0	0	4.55475e-08	0	0	0
dithianon	Dithianon	Pesticides (air)	Emissions to air	Emissions to air, unspecified	6e3100e6-c937-4501-804d-2e14a4e3e9de	35060.2	kg	FAOstat - Pesticide usage data	Eurostat - harvested areas	Literature	Method F	Pesticides				1.5466e-06									849.478			0	0	0	0.0542241	0	0	0	0	0	0	0	0	2.97829e+07	0	0	0	0	0	2.01654e-07	0	0	0
dithianon	Dithianon	Pesticides (soil)	Emissions to soil	Emissions to soil, unspecified	ff6bac1e-bbac-40c0-9b07-fb8fd5d82c67	46747	kg	FAOstat - Pesticide usage data	Eurostat - harvested areas	Literature	Method F	Pesticides				4.67218e-08									365.707			0	0	0	0.0021841	0	0	0	0	0	0	0	0	1.70957e+07	0	0	0	0	0	8.12244e-09	0	0	0
diuron	Diuron	pesticide	emissions to soil	emissions to soil, unspecified	fe0acd60-3ddc-11dd-a2f5-0050c2490048	0	kg	E-PRTR	Not applicable	Not applicable	Method E					4.44312e-07									4019.34			0	0	0	0	0	0	0	0	0	0	0	0	0	0	0	0	0	0	0	0	0	0
diuron	Diuron	Non-industrial releases	emissions to water	emissions to water, unspecified	4d9a8790-3ddd-11dd-8ed0-0050c2490048	3.8401	kg	Waterbase	Eurostat - WWTP-connection stats	Not applicable	Method D2	Toxic waterborne emissions				6.64121e-06									60117.5			0	0	0	2.55029e-05	0	0	0	0	0	0	0	0	230857	0	0	0	0	0	9.48426e-11	0	0	0
diuron	Diuron	Pesticides (surface water)	Emissions to water	Emissions to water, unspecified	4d9a8790-3ddd-11dd-8ed0-0050c2490048	577.103	kg	Literature	Eurostat - harvested areas	Not applicable	Method F	Pesticides				6.64121e-06									60117.5			0	0	0	0.00383266	0	0	0	0	0	0	0	0	3.4694e+07	0	0	0	0	0	1.42533e-08	0	0	0
diuron	Diuron	Industrial releases	emissions to water	emissions to water, unspecified	4d9a8790-3ddd-11dd-8ed0-0050c2490048	861.245	kg	E-PRTR	EUROSTAT - economic data	Not applicable	Method D1	Toxic waterborne emissions				6.64121e-06									60117.5			0	0	0	0.00571971	0	0	0	0	0	0	0	0	5.17759e+07	0	0	0	0	0	2.1271e-08	0	0	0
diuron	Diuron	Pesticides (air)	Emissions to air	Emissions to air, unspecified	fe0acd60-3ddc-11dd-a2f6-0050c2490048	8656.55	kg	FAOstat - Pesticide usage data	Eurostat - harvested areas	Literature	Method F	Pesticides				3.25961e-06									2888.8			0	0	0	0.028217	0	0	0	0	0	0	0	0	2.50071e+07	0	0	0	0	0	1.04936e-07	0	0	0
diuron	Diuron	Pesticides (soil)	Emissions to soil	Emissions to soil, unspecified	fe0acd60-3ddc-11dd-a2f5-0050c2490048	39721.1	kg	FAOstat - Pesticide usage data	Eurostat - harvested areas	Literature	Method F	Pesticides				4.44312e-07									4019.34			0	0	0	0.0176485	0	0	0	0	0	0	0	0	1.59652e+08	0	0	0	0	0	6.5633e-08	0	0	0
dodecane	n-dodecane		emissions to air	emissions to air, unspecified	fe0acd60-3ddc-11dd-a822-0050c2490048	5.47002e+06	kg	EMEP	E-PRTR	Literature	Method A	NMVOC breakdown estimates							0.603									0	0	0	0	0	0	3.29842e+06	0	0	0	0	0	0	0	0	0	0	0	0	0	0	0.00020867
dodine	Dodine	Pesticides (surface water)	Emissions to water	Emissions to water, unspecified	c598084f-6706-4f1e-9b57-814a7e53ea8d	1058.94	kg	Literature	Eurostat - harvested areas	Not applicable	Method F	Pesticides				1.63487e-07									17044.6			0	0	0	0.000173123	0	0	0	0	0	0	0	0	1.80493e+07	0	0	0	0	0	6.43826e-10	0	0	0
dodine	Dodine	Pesticides (air)	Emissions to air	Emissions to air, unspecified	176487cf-cc83-49c9-8fee-2742efa3b432	15884.1	kg	FAOstat - Pesticide usage data	Eurostat - harvested areas	Literature	Method F	Pesticides				5.01054e-08									183.064			0	0	0	0.00079588	0	0	0	0	0	0	0	0	2.90782e+06	0	0	0	0	0	2.9598e-09	0	0	0
dodine	Dodine	Pesticides (soil)	Emissions to soil	Emissions to soil, unspecified	88fa2620-8182-47f0-99d4-8ee712fa05d8	21178.8	kg	FAOstat - Pesticide usage data	Eurostat - harvested areas	Literature	Method F	Pesticides				1.36001e-10									14.1787			0	0	0	2.88034e-06	0	0	0	0	0	0	0	0	300288	0	0	0	0	0	1.07117e-11	0	0	0
dolomite	Dolomite, crude, roughly trimmed or merely cut into rectangular or square blocks or slabs (excluding calcined, crushed dolomite aggregate)		resource flows	Non-renewable material resources from ground	fe0acd60-3ddc-11dd-a826-0050c2490048	3.2667e+10	kg	Eurostat - Prodcom	Not applicable	Not applicable	method K3																	0	0	0	0	0	0	0	0	0	0	0	0	0	0	0	0	0	0	0	0	0	0
endosulfan	endosulfan		emissions to water	emissions to water, unspecified	fe0acd60-3ddc-11dd-a673-0050c2490048	0	kg	Not applicable	Not applicable	Not applicable	Not applicable					3.21609e-05									589677			0	0	0	0	0	0	0	0	0	0	0	0	0	0	0	0	0	0	0	0	0	0
endosulfan	Endosulphan	Industrial releases	emissions to water	emissions to water, unspecified	fe0acd60-3ddc-11dd-a673-0050c2490048	115.644	kg	E-PRTR	EUROSTAT - economic data	Not applicable	Method D1	Toxic waterborne emissions				3.21609e-05									589677			0	0	0	0.00371921	0	0	0	0	0	0	0	0	6.81924e+07	0	0	0	0	0	1.38313e-08	0	0	0
endosulfan	Endosulfan	Pesticides (surface water)	Emissions to water	Emissions to water, unspecified	fe0acd60-3ddc-11dd-a673-0050c2490048	146.876	kg	Literature	Eurostat - harvested areas	Not applicable	Method F	Pesticides				3.21609e-05									589677			0	0	0	0.00472366	0	0	0	0	0	0	0	0	8.66092e+07	0	0	0	0	0	1.75668e-08	0	0	0
endosulfan	Endosulfan	Pesticides (air)	Emissions to air	Emissions to air, unspecified	fe0acd60-3ddc-11dd-a66d-0050c2490048	2203.14	kg	FAOstat - Pesticide usage data	Eurostat - harvested areas	Literature	Method F	Pesticides				4.31963e-06									3680.16			0	0	0	0.00951673	0	0	0	0	0	0	0	0	8.10789e+06	0	0	0	0	0	3.53917e-08	0	0	0
endosulfan	Endosulfan	Pesticides (soil)	Emissions to soil	Emissions to soil, unspecified	fe0acd60-3ddc-11dd-a66c-0050c2490048	2937.52	kg	FAOstat - Pesticide usage data	Eurostat - harvested areas	Literature	Method F	Pesticides				5.40152e-07									4538.02			0	0	0	0.0015867	0	0	0	0	0	0	0	0	1.33305e+07	0	0	0	0	0	5.90079e-09	0	0	0
endrin	Endrin		emissions to water	emissions to water, unspecified	4d9a8790-3ddd-11dd-9c1b-0050c2490048	0	kg	Not applicable	Not applicable	Not applicable	Not applicable					0.00779607									1.16841e+07			0	0	0	0	0	0	0	0	0	0	0	0	0	0	0	0	0	0	0	0	0	0
endrin	Endrin	pesticide	emissions to soil	emissions to soil, unspecified	4d9a8790-3ddd-11dd-9c14-0050c2490048	0	kg	E-PRTR	Not applicable	Not applicable	Method E					9.22152e-05									98218.4			0	0	0	0	0	0	0	0	0	0	0	0	0	0	0	0	0	0	0	0	0	0
endrin	Endrin		emissions to air	emissions to air, unspecified	4d9a8790-3ddd-11dd-9c15-0050c2490048	0	kg	EMEP	E-PRTR	Not applicable	Method C	Toxic airborne emissions				0.000334011									129337			0	0	0	0	0	0	0	0	0	0	0	0	0	0	0	0	0	0	0	0	0	0
endrin	Endrin	Non-industrial releases	emissions to water	emissions to water, unspecified	4d9a8790-3ddd-11dd-9c1b-0050c2490048	0.0340688	kg	Waterbase	Eurostat - WWTP-connection stats	Not applicable	Method D2	Toxic waterborne emissions				0.00779607									1.16841e+07			0	0	0	0.000265603	0	0	0	0	0	0	0	0	398065	0	0	0	0	0	9.8775e-10	0	0	0
endrin	Endrin	Industrial releases	emissions to water	emissions to water, unspecified	4d9a8790-3ddd-11dd-9c1b-0050c2490048	294.676	kg	E-PRTR	EUROSTAT - economic data	Not applicable	Method D1	Toxic waterborne emissions				0.00779607									1.16841e+07			0	0	0	2.29732	0	0	0	0	0	0	0	0	3.44304e+09	0	0	0	0	0	8.54347e-06	0	0	0
erythromycin	Erythromycin		emissions to water	emissions to water, unspecified	7b662438-dd3d-4bad-a809-d8308b08a2b8	0	kg	Not applicable	Not applicable	Not applicable	Not applicable														24922.9			0	0	0	0	0	0	0	0	0	0	0	0	0	0	0	0	0	0	0	0	0	0
erythromycin	Erythromycin	Pharmaceuticals	emissions to water	emissions to water, unspecified	7b662438-dd3d-4bad-a809-d8308b08a2b8	111537	kg	Literature	Not applicable	Not applicable	Method D3	Toxic waterborne emissions													24922.9			0	0	0	0	0	0	0	0	0	0	0	0	2.77983e+09	0	0	0	0	0	0	0	0	0
esfenvalerate	Esfenvalerate		emissions to water	emissions to water, unspecified	fe0acd60-3ddc-11dd-a322-0050c2490048	0	kg	Not applicable	Not applicable	Not applicable	Not applicable														1.90439e+07			0	0	0	0	0	0	0	0	0	0	0	0	0	0	0	0	0	0	0	0	0	0
esfenvalerate	Esfenvalerate	Pesticides (surface water)	Emissions to water	Emissions to water, unspecified	fe0acd60-3ddc-11dd-a322-0050c2490048	72.9715	kg	Literature	Eurostat - harvested areas	Not applicable	Method F	Pesticides													1.90439e+07			0	0	0	0	0	0	0	0	0	0	0	0	1.38966e+09	0	0	0	0	0	0	0	0	0
esfenvalerate	Esfenvalerate	Pesticides (air)	Emissions to air	Emissions to air, unspecified	fe0acd60-3ddc-11dd-a31c-0050c2490048	1094.57	kg	FAOstat - Pesticide usage data	Eurostat - harvested areas	Literature	Method F	Pesticides													385156			0	0	0	0	0	0	0	0	0	0	0	0	4.21581e+08	0	0	0	0	0	0	0	0	0
esfenvalerate	Esfenvalerate	Pesticides (soil)	Emissions to soil	Emissions to soil, unspecified	fe0acd60-3ddc-11dd-a31b-0050c2490048	1459.43	kg	FAOstat - Pesticide usage data	Eurostat - harvested areas	Literature	Method F	Pesticides													112006			0	0	0	0	0	0	0	0	0	0	0	0	1.63465e+08	0	0	0	0	0	0	0	0	0
estradiol	17β-estradiol (E2)		emissions to water	emissions to water, unspecified	4d9a8790-3ddd-11dd-8faa-0050c2490048	0	kg	Not applicable	Not applicable	Not applicable	Not applicable														1.84138e+08			0	0	0	0	0	0	0	0	0	0	0	0	0	0	0	0	0	0	0	0	0	0
estradiol	17β-estradiol (E2)	Pharmaceuticals	emissions to water	emissions to water, unspecified	4d9a8790-3ddd-11dd-8faa-0050c2490048	1045.98	kg	Literature	Not applicable	Not applicable	Method D3	Toxic waterborne emissions													1.84138e+08			0	0	0	0	0	0	0	0	0	0	0	0	1.92604e+11	0	0	0	0	0	0	0	0	0
ethalfluralin	Ethalfluralin	Pesticides (surface water)	Emissions to water	Emissions to water, unspecified	08a91e70-3ddc-11dd-9ef5-0050c2490048	1815.73	kg	Literature	Eurostat - harvested areas	Not applicable	Method F	Pesticides													256352			0	0	0	0	0	0	0	0	0	0	0	0	4.65466e+08	0	0	0	0	0	0	0	0	0
ethalfluralin	Ethalfluralin	Pesticides (air)	Emissions to air	Emissions to air, unspecified	08a91e70-3ddc-11dd-9eef-0050c2490048	27236	kg	FAOstat - Pesticide usage data	Eurostat - harvested areas	Literature	Method F	Pesticides													156.587			0	0	0	0	0	0	0	0	0	0	0	0	4.2648e+06	0	0	0	0	0	0	0	0	0
ethalfluralin	Ethalfluralin	Pesticides (soil)	Emissions to soil	Emissions to soil, unspecified	4d9a8790-3ddd-11dd-8fb9-0050c2490048	133163	kg	FAOstat - Pesticide usage data	Eurostat - harvested areas	Literature	Method F	Pesticides													4551.23			0	0	0	0	0	0	0	0	0	0	0	0	6.06057e+08	0	0	0	0	0	0	0	0	0
ethane	ethane		emissions to air	emissions to air, unspecified	4d9a8790-3ddd-11dd-9219-0050c2490048	1.87983e+08	kg	EMEP	E-PRTR	Literature	Method A	NMVOC breakdown estimates							0.208									0	0	0	0	0	0	3.91005e+07	0	0	0	0	0	0	0	0	0	0	0	0	0	0	0.00247364
ethanol	ethanol		emissions to soil	emissions to soil, unspecified	08a91e70-3ddc-11dd-9348-0050c2490048	0	kg	Not applicable	Not applicable	Not applicable	Not applicable				6.3515e-10										0.603906			0	0	0	0	0	0	0	0	0	0	0	0	0	0	0	0	0	0	0	0	0	0
ethanol	ethanol		emissions to water	emissions to water, unspecified	fe0acd60-3ddc-11dd-a3f3-0050c2490048	0	kg	Not applicable	Not applicable	Not applicable	Not applicable				2.54268e-09										3.11364			0	0	0	0	0	0	0	0	0	0	0	0	0	0	0	0	0	0	0	0	0	0
ethanol	ethanol		emissions to air	emissions to air, unspecified	08a91e70-3ddc-11dd-9349-0050c2490048	4.79545e+08	kg	EMEP	E-PRTR	Literature	Method A	NMVOC breakdown estimates			2.13732e-09				0.674						0.152821			0	0	1.02494	0	0	0	3.23214e+08	0	0	0	0	0	7.32847e+07	0	0	0	0	5.45826e-05	0	0	0	0.0204477
ethephon	Ethephon		emissions to water	emissions to water, unspecified	fe0acd60-3ddc-11dd-a440-0050c2490048	0	kg	Not applicable	Not applicable	Not applicable	Not applicable					5.18584e-06									1364.08			0	0	0	0	0	0	0	0	0	0	0	0	0	0	0	0	0	0	0	0	0	0
ethephon	Ethephon	Pesticides (surface water)	Emissions to water	Emissions to water, unspecified	fe0acd60-3ddc-11dd-a440-0050c2490048	30.65	kg	FAOstat - Pesticide usage data	Eurostat - harvested areas	Eurostat - organic farming areas	Method F	Pesticides				5.18584e-06									1364.08			0	0	0	0.000158946	0	0	0	0	0	0	0	0	41809.1	0	0	0	0	0	5.91104e-10	0	0	0
ethephon	Ethephon	Pesticides (air)	Emissions to air	Emissions to air, unspecified	08a91e70-3ddc-11dd-934d-0050c2490048	459.75	kg	FAOstat - Pesticide usage data	Eurostat - harvested areas	Literature	Method F	Pesticides				5.23031e-06									444.732			0	0	0	0.00240464	0	0	0	0	0	0	0	0	204465	0	0	0	0	0	8.94259e-09	0	0	0
ethephon	Ethephon	Pesticides (soil)	Emissions to soil	Emissions to soil, unspecified	08a91e70-3ddc-11dd-934c-0050c2490048	613	kg	FAOstat - Pesticide usage data	Eurostat - harvested areas	Eurostat - organic farming areas	Method F	Pesticides				2.12921e-06									560.065			0	0	0	0.0013052	0	0	0	0	0	0	0	0	343320	0	0	0	0	0	4.85391e-09	0	0	0
ethinylestradiol	17α-ethynyl estradiol (EE2)		emissions to water	emissions to water, unspecified	1f3a80f8-669c-48f9-961c-0f0974392dd1	0	kg	Not applicable	Not applicable	Not applicable	Not applicable				0.00037559										1.69065e+06			0	0	0	0	0	0	0	0	0	0	0	0	0	0	0	0	0	0	0	0	0	0
ethinylestradiol	17α-ethynyl estradiol (EE2)	Pharmaceuticals	emissions to water	emissions to water, unspecified	1f3a80f8-669c-48f9-961c-0f0974392dd1	32.3059	kg	Literature	Not applicable	Not applicable	Method D3	Toxic waterborne emissions			0.00037559										1.69065e+06			0	0	0.0121338	0	0	0	0	0	0	0	0	0	5.46181e+07	0	0	0	0	6.46176e-07	0	0	0	0
ethiofencarb	Ethiofencarb	Pesticides (surface water)	Emissions to water	Emissions to water, unspecified	25241946-a752-4507-906a-b47dfb6f61d1	425.418	kg	FAOstat - Pesticide usage data	Eurostat - harvested areas	Eurostat - organic farming areas	Method F	Pesticides				1.07545e-06									4797.6			0	0	0	0.000457516	0	0	0	0	0	0	0	0	2.04098e+06	0	0	0	0	0	1.70145e-09	0	0	0
ethiofencarb	Ethiofencarb	Pesticides (air)	Emissions to air	Emissions to air, unspecified	cacc353e-3da0-4dab-b811-fe121bd9bd97	6381.26	kg	FAOstat - Pesticide usage data	Eurostat - harvested areas	Literature	Method F	Pesticides				3.91639e-07									136.254			0	0	0	0.00249915	0	0	0	0	0	0	0	0	869473	0	0	0	0	0	9.29408e-09	0	0	0
ethiofencarb	Ethiofencarb	Pesticides (soil)	Emissions to soil	Emissions to soil, unspecified	e18f6a0a-ee72-4a9a-a857-dade8923b635	8508.35	kg	FAOstat - Pesticide usage data	Eurostat - harvested areas	Eurostat - organic farming areas	Method F	Pesticides				5.54422e-08									247.081			0	0	0	0.000471722	0	0	0	0	0	0	0	0	2.10225e+06	0	0	0	0	0	1.75428e-09	0	0	0
ethion	Ethion	Pesticides (surface water)	Emissions to water	Emissions to water, unspecified	08a91e70-3ddc-11dd-9356-0050c2490048	578.864	kg	Literature	Eurostat - harvested areas	Not applicable	Method F	Pesticides				0.000516082									210626			0	0	0	0.298741	0	0	0	0	0	0	0	0	1.21924e+08	0	0	0	0	0	1.11099e-06	0	0	0
ethion	Ethion	Pesticides (air)	Emissions to air	Emissions to air, unspecified	08a91e70-3ddc-11dd-9350-0050c2490048	8682.96	kg	FAOstat - Pesticide usage data	Eurostat - harvested areas	Literature	Method F	Pesticides				4.82868e-06									736.777			0	0	0	0.0419272	0	0	0	0	0	0	0	0	6.3974e+06	0	0	0	0	0	1.55923e-07	0	0	0
ethion	Ethion	Pesticides (soil)	Emissions to soil	Emissions to soil, unspecified	fe0acd60-3ddc-11dd-a452-0050c2490048	11577.3	kg	FAOstat - Pesticide usage data	Eurostat - harvested areas	Literature	Method F	Pesticides				9.3899e-07									382.45			0	0	0	0.010871	0	0	0	0	0	0	0	0	4.42772e+06	0	0	0	0	0	4.04279e-08	0	0	0
ethirimol	Ethirimol	Pesticides (surface water)	Emissions to water	Emissions to water, unspecified	6fcd7f6a-c61b-4308-a8b8-67ee7d612cb6	369.525	kg	FAOstat - Pesticide usage data	Eurostat - harvested areas	Eurostat - organic farming areas	Method F	Pesticides													396.278			0	0	0	0	0	0	0	0	0	0	0	0	146434	0	0	0	0	0	0	0	0	0
ethirimol	Ethirimol	Pesticides (air)	Emissions to air	Emissions to air, unspecified	9061cb36-1b4d-4900-8fa5-c9cf57ff6110	5542.87	kg	FAOstat - Pesticide usage data	Eurostat - harvested areas	Literature	Method F	Pesticides													4.18086			0	0	0	0	0	0	0	0	0	0	0	0	23173.9	0	0	0	0	0	0	0	0	0
ethirimol	Ethirimol	Pesticides (soil)	Emissions to soil	Emissions to soil, unspecified	b2e6b733-cd3b-4b75-92d7-43b6620a2583	7390.49	kg	FAOstat - Pesticide usage data	Eurostat - harvested areas	Eurostat - organic farming areas	Method F	Pesticides													3.7354			0	0	0	0	0	0	0	0	0	0	0	0	27606.5	0	0	0	0	0	0	0	0	0
ethofumesate	Ethofumesate	Pesticides (surface water)	Emissions to water	Emissions to water, unspecified	08a91e70-3ddc-11dd-935d-0050c2490048	6669.58	kg	Literature	Eurostat - harvested areas	Not applicable	Method F	Pesticides													3938.68			0	0	0	0	0	0	0	0	0	0	0	0	2.62693e+07	0	0	0	0	0	0	0	0	0
ethofumesate	Ethofumesate	Pesticides (air)	Emissions to air	Emissions to air, unspecified	4d9a8790-3ddd-11dd-9004-0050c2490048	100044	kg	FAOstat - Pesticide usage data	Eurostat - harvested areas	Literature	Method F	Pesticides													69.396			0	0	0	0	0	0	0	0	0	0	0	0	6.94263e+06	0	0	0	0	0	0	0	0	0
ethofumesate	Ethofumesate	Pesticides (soil)	Emissions to soil	Emissions to soil, unspecified	08a91e70-3ddc-11dd-935a-0050c2490048	493549	kg	FAOstat - Pesticide usage data	Eurostat - harvested areas	Literature	Method F	Pesticides													202.581			0	0	0	0	0	0	0	0	0	0	0	0	9.99834e+07	0	0	0	0	0	0	0	0	0
ethoprophos	Ethoprophos	Pesticides (surface water)	Emissions to water	Emissions to water, unspecified	fe0acd60-3ddc-11dd-a459-0050c2490048	578.864	kg	Literature	Eurostat - harvested areas	Not applicable	Method F	Pesticides				0.000185675									212452			0	0	0	0.10748	0	0	0	0	0	0	0	0	1.22981e+08	0	0	0	0	0	3.99708e-07	0	0	0
ethoprophos	Ethoprophos	Pesticides (air)	Emissions to air	Emissions to air, unspecified	fe0acd60-3ddc-11dd-a453-0050c2490048	8682.96	kg	FAOstat - Pesticide usage data	Eurostat - harvested areas	Literature	Method F	Pesticides				4.74967e-05									2994.19			0	0	0	0.412412	0	0	0	0	0	0	0	0	2.59984e+07	0	0	0	0	0	1.53372e-06	0	0	0
ethoprophos	Ethoprophos	Pesticides (soil)	Emissions to soil	Emissions to soil, unspecified	08a91e70-3ddc-11dd-9361-0050c2490048	11577.3	kg	FAOstat - Pesticide usage data	Eurostat - harvested areas	Literature	Method F	Pesticides				1.58035e-05									17345.5			0	0	0	0.182962	0	0	0	0	0	0	0	0	2.00813e+08	0	0	0	0	0	6.80416e-07	0	0	0
ethyl acetate	ethyl acetate		emissions to soil	emissions to soil, unspecified	4d9a8790-3ddd-11dd-97b9-0050c2490048	0	kg	Not applicable	Not applicable	Not applicable	Not applicable					1.4919e-09									0.871238			0	0	0	0	0	0	0	0	0	0	0	0	0	0	0	0	0	0	0	0	0	0
ethyl acetate	ethyl acetate		emissions to water	emissions to water, unspecified	4d9a8790-3ddd-11dd-97c0-0050c2490048	0	kg	Not applicable	Not applicable	Not applicable	Not applicable					4.30244e-09									5.86649			0	0	0	0	0	0	0	0	0	0	0	0	0	0	0	0	0	0	0	0	0	0
ethyl acetate	ethyl acetate		emissions to air	emissions to air, unspecified	4d9a8790-3ddd-11dd-97ba-0050c2490048	3.79254e+07	kg	EMEP	E-PRTR	Literature	Method A	NMVOC breakdown estimates				5.2257e-09			0.353						0.113219			0	0	0	0.198186	0	0	1.33877e+07	0	0	0	0	0	4.29388e+06	0	0	0	0	0	7.37035e-07	0	0	0.000846952
ethyl benzene	Ethyl benzene	Industrial releases	emissions to water	emissions to water, unspecified	08a91e70-3ddc-11dd-a2f6-0050c2490048	214817	kg	E-PRTR	EUROSTAT - economic data	Not applicable	Method D1	Toxic waterborne emissions			4.73175e-08	3.7253e-08									174.894			0	0	0.0101646	0.00800257	0	0	0	0	0	0	0	0	3.75703e+07	0	0	0	0	5.41308e-07	2.97607e-08	0	0	0
ethyl benzene	ethyl benzene		emissions to air	emissions to air, unspecified	fe0acd60-3ddc-11dd-a2eb-0050c2490048	1.02465e+08	kg	EMEP	E-PRTR	Literature	Method A	NMVOC breakdown estimates			3.34258e-07	5.49895e-09			1.23						0.0283757			0	0	34.2496	0.563449	0	0	1.26032e+08	0	0	0	0	0	2.90751e+06	0	0	0	0	0.00182394	2.09541e-06	0	0	0.00797323
ethylcyclohexane	4-ethylcyclohexane		emissions to air	emissions to air, unspecified	08a91e70-3ddc-11dd-9374-0050c2490048	5.18077e+06	kg	EMEP	E-PRTR	Literature	Method A	NMVOC breakdown estimates													0.00332154			0	0	0	0	0	0	0	0	0	0	0	0	17208.1	0	0	0	0	0	0	0	0	0
ethylene	ethylene		emissions to air	emissions to air, unspecified	fe0acd60-3ddc-11dd-a47d-0050c2490048	2.84174e+08	kg	EMEP	E-PRTR	Literature	Method A	NMVOC breakdown estimates							1.69									0	0	0	0	0	0	4.80253e+08	0	0	0	0	0	0	0	0	0	0	0	0	0	0	0.0303826
ethylene glycol	ethylenglycol		emissions to air	emissions to air, unspecified	08a91e70-3ddc-11dd-938a-0050c2490048	0	kg	EMEP	E-PRTR	Literature	Method A	NMVOC breakdown estimates				1.44574e-08			0.63						0.181489			0	0	0	0	0	0	0	0	0	0	0	0	0	0	0	0	0	0	0	0	0	0
ethylene oxide	Ethylene oxide		emissions to water	emissions to water, unspecified	08a91e70-3ddc-11dd-9390-0050c2490048	0	kg	Not applicable	Not applicable	Not applicable	Not applicable				1.7159e-06										23.5346			0	0	0	0	0	0	0	0	0	0	0	0	0	0	0	0	0	0	0	0	0	0
ethylene oxide	Ethylene oxide		emissions to soil	emissions to soil, unspecified	fe0acd60-3ddc-11dd-a487-0050c2490048	0	kg	Not applicable	Not applicable	Not applicable	Not applicable				4.72793e-07										3.7696			0	0	0	0	0	0	0	0	0	0	0	0	0	0	0	0	0	0	0	0	0	0
ethylene oxide	Ethylene oxide	Industrial releases	emissions to water	emissions to water, unspecified	08a91e70-3ddc-11dd-9390-0050c2490048	2660.72	kg	E-PRTR	EUROSTAT - economic data	Not applicable	Method D1	Toxic waterborne emissions			1.7159e-06										23.5346			0	0	0.00456553	0	0	0	0	0	0	0	0	0	62619	0	0	0	0	2.43134e-07	0	0	0	0
ethylene oxide	Ethylene oxide		emissions to air	emissions to air, unspecified	fe0acd60-3ddc-11dd-a488-0050c2490048	57350	kg	EMEP	E-PRTR	Not applicable	Method C	Toxic airborne emissions			8.30466e-07										1.00702			0	0	0.0476272	0	0	0	0	0	0	0	0	0	57752.8	0	0	0	0	2.53635e-06	0	0	0	0
ethylenediamine	ethylenediamine		emissions to soil	emissions to soil, unspecified	4d9a8790-3ddd-11dd-97e6-0050c2490048	0	kg	Not applicable	Not applicable	Not applicable	Not applicable														81.338			0	0	0	0	0	0	0	0	0	0	0	0	0	0	0	0	0	0	0	0	0	0
ethylenediamine	ethylenediamine		emissions to water	emissions to water, unspecified	08a91e70-3ddc-11dd-9dd5-0050c2490048	0	kg	Not applicable	Not applicable	Not applicable	Not applicable														392.982			0	0	0	0	0	0	0	0	0	0	0	0	0	0	0	0	0	0	0	0	0	0
etridiazole	Etridiazole	Pesticides (surface water)	Emissions to water	Emissions to water, unspecified	4d9a8790-3ddd-11dd-902a-0050c2490048	1480.68	kg	Literature	Eurostat - harvested areas	Not applicable	Method F	Pesticides													48533.7			0	0	0	0	0	0	0	0	0	0	0	0	7.18628e+07	0	0	0	0	0	0	0	0	0
etridiazole	Etridiazole	Pesticides (air)	Emissions to air	Emissions to air, unspecified	4d9a8790-3ddd-11dd-9024-0050c2490048	22210.1	kg	FAOstat - Pesticide usage data	Eurostat - harvested areas	Literature	Method F	Pesticides													1639.31			0	0	0	0	0	0	0	0	0	0	0	0	3.64092e+07	0	0	0	0	0	0	0	0	0
etridiazole	Etridiazole	Pesticides (soil)	Emissions to soil	Emissions to soil, unspecified	08a91e70-3ddc-11dd-9fe9-0050c2490048	29613.5	kg	FAOstat - Pesticide usage data	Eurostat - harvested areas	Literature	Method F	Pesticides													1449.89			0	0	0	0	0	0	0	0	0	0	0	0	4.29363e+07	0	0	0	0	0	0	0	0	0
feldspar	Feldspar and other feldspathic materials		resource flows	Non-renewable material resources from ground	4d9a8790-3ddd-11dd-9125-0050c2490048	8.0501e+09	kg	Eurostat - Prodcom	Not applicable	Not applicable	Method K3	Time interpolation for resource depletion - metal ores and minerals																0	0	0	0	0	0	0	0	0	0	0	0	0	0	0	0	0	0	0	0	0	0
fenamiphos	Fenamiphos	Pesticides (surface water)	Emissions to water	Emissions to water, unspecified	08a91e70-3ddc-11dd-a078-0050c2490048	578.864	kg	Literature	Eurostat - harvested areas	Not applicable	Method F	Pesticides				6.95305e-05									521063			0	0	0	0.0402487	0	0	0	0	0	0	0	0	3.01625e+08	0	0	0	0	0	1.49681e-07	0	0	0
fenamiphos	Fenamiphos	Pesticides (air)	Emissions to air	Emissions to air, unspecified	4d9a8790-3ddd-11dd-90d2-0050c2490048	8682.96	kg	FAOstat - Pesticide usage data	Eurostat - harvested areas	Literature	Method F	Pesticides				1.00223e-05									8721.9			0	0	0	0.0870229	0	0	0	0	0	0	0	0	7.57318e+07	0	0	0	0	0	3.23629e-07	0	0	0
fenamiphos	Fenamiphos	Pesticides (soil)	Emissions to soil	Emissions to soil, unspecified	4d9a8790-3ddd-11dd-90d1-0050c2490048	11577.3	kg	FAOstat - Pesticide usage data	Eurostat - harvested areas	Literature	Method F	Pesticides				3.74365e-06									28046.6			0	0	0	0.0433413	0	0	0	0	0	0	0	0	3.24704e+08	0	0	0	0	0	1.61182e-07	0	0	0
fenbuconazole	Fenbuconazole	Pesticides (surface water)	Emissions to water	Emissions to water, unspecified	4d9a8790-3ddd-11dd-90ee-0050c2490048	1480.68	kg	Literature	Eurostat - harvested areas	Not applicable	Method F	Pesticides				4.81076e-06									50132.5			0	0	0	0.00712317	0	0	0	0	0	0	0	0	7.42299e+07	0	0	0	0	0	2.64903e-08	0	0	0
fenbuconazole	Fenbuconazole	Pesticides (air)	Emissions to air	Emissions to air, unspecified	08a91e70-3ddc-11dd-a07d-0050c2490048	22210.1	kg	FAOstat - Pesticide usage data	Eurostat - harvested areas	Literature	Method F	Pesticides				2.24079e-06									1151.23			0	0	0	0.0497682	0	0	0	0	0	0	0	0	2.5569e+07	0	0	0	0	0	1.85083e-07	0	0	0
fenbuconazole	Fenbuconazole	Pesticides (soil)	Emissions to soil	Emissions to soil, unspecified	08a91e70-3ddc-11dd-a07c-0050c2490048	29613.5	kg	FAOstat - Pesticide usage data	Eurostat - harvested areas	Literature	Method F	Pesticides				3.19924e-09									30.6062			0	0	0	9.47408e-05	0	0	0	0	0	0	0	0	906357	0	0	0	0	0	3.52331e-10	0	0	0
fenitrothion	Fenitrothion	Pesticides (surface water)	Emissions to water	Emissions to water, unspecified	08a91e70-3ddc-11dd-93a6-0050c2490048	578.864	kg	Literature	Eurostat - harvested areas	Not applicable	Method F	Pesticides				3.41201e-05									197584			0	0	0	0.0197509	0	0	0	0	0	0	0	0	1.14374e+08	0	0	0	0	0	7.34514e-08	0	0	0
fenitrothion	Fenitrothion	Pesticides (air)	Emissions to air	Emissions to air, unspecified	4d9a8790-3ddd-11dd-9128-0050c2490048	8682.96	kg	FAOstat - Pesticide usage data	Eurostat - harvested areas	Literature	Method F	Pesticides				4.2982e-06									1314.63			0	0	0	0.0373211	0	0	0	0	0	0	0	0	1.14149e+07	0	0	0	0	0	1.38793e-07	0	0	0
fenitrothion	Fenitrothion	Pesticides (soil)	Emissions to soil	Emissions to soil, unspecified	4d9a8790-3ddd-11dd-9127-0050c2490048	11577.3	kg	FAOstat - Pesticide usage data	Eurostat - harvested areas	Literature	Method F	Pesticides				1.46722e-06									7814.4			0	0	0	0.0169864	0	0	0	0	0	0	0	0	9.04695e+07	0	0	0	0	0	6.31708e-08	0	0	0
fenoxaprop-p-ethyl	Fenoxaprop-P-ethyl		emissions to air	emissions to air, unspecified	3e4d9ea2-6556-11dd-ad8b-0800200c9a66	0	kg	Not applicable	Not applicable	Not applicable	Not applicable														850.004			0	0	0	0	0	0	0	0	0	0	0	0	0	0	0	0	0	0	0	0	0	0
fenoxycarb	Fenoxycarb	Pesticides (surface water)	Emissions to water	Emissions to water, unspecified	de836c61-6a08-49d8-babf-5e3cfdabaf53	425.418	kg	FAOstat - Pesticide usage data	Eurostat - harvested areas	Eurostat - organic farming areas	Method F	Pesticides													137229			0	0	0	0	0	0	0	0	0	0	0	0	5.83797e+07	0	0	0	0	0	0	0	0	0
fenoxycarb	Fenoxycarb	Pesticides (air)	Emissions to air	Emissions to air, unspecified	b434663c-272a-4cc3-b704-b0a9e6d272dd	6381.26	kg	FAOstat - Pesticide usage data	Eurostat - harvested areas	Literature	Method F	Pesticides													2136.58			0	0	0	0	0	0	0	0	0	0	0	0	1.36341e+07	0	0	0	0	0	0	0	0	0
fenoxycarb	Fenoxycarb	Pesticides (soil)	Emissions to soil	Emissions to soil, unspecified	dbc1bbe6-7427-4984-ab98-755d8da89557	8508.35	kg	FAOstat - Pesticide usage data	Eurostat - harvested areas	Eurostat - organic farming areas	Method F	Pesticides													2625.62			0	0	0	0	0	0	0	0	0	0	0	0	2.23397e+07	0	0	0	0	0	0	0	0	0
fenpiclonil	fenpiclonil		emissions to water	emissions to water, unspecified	3e4d9ebb-6556-11dd-ad8b-0800200c9a66	0	kg	Not applicable	Not applicable	Not applicable	Not applicable														60395.8			0	0	0	0	0	0	0	0	0	0	0	0	0	0	0	0	0	0	0	0	0	0
fenpiclonil	Fenpiclonil	Pesticides (surface water)	Emissions to water	Emissions to water, unspecified	3e4d9ebb-6556-11dd-ad8b-0800200c9a66	10.88	kg	FAOstat - Pesticide usage data	Eurostat - harvested areas	Eurostat - organic farming areas	Method F	Pesticides													60395.8			0	0	0	0	0	0	0	0	0	0	0	0	657106	0	0	0	0	0	0	0	0	0
fenpiclonil	Fenpiclonil	Pesticides (air)	Emissions to air	Emissions to air, unspecified	3e4d9eb3-6556-11dd-ad8b-0800200c9a66	163.2	kg	FAOstat - Pesticide usage data	Eurostat - harvested areas	Literature	Method F	Pesticides													1239.67			0	0	0	0	0	0	0	0	0	0	0	0	202314	0	0	0	0	0	0	0	0	0
fenpiclonil	Fenpiclonil	Pesticides (soil)	Emissions to soil	Emissions to soil, unspecified	08a91e70-3ddc-11dd-93b5-0050c2490048	217.6	kg	FAOstat - Pesticide usage data	Eurostat - harvested areas	Eurostat - organic farming areas	Method F	Pesticides													384.083			0	0	0	0	0	0	0	0	0	0	0	0	83576.4	0	0	0	0	0	0	0	0	0
fenpropathrin	Fenpropathrin	Pesticides (surface water)	Emissions to water	Emissions to water, unspecified	4d9a8790-3ddd-11dd-90e3-0050c2490048	72.9715	kg	Literature	Eurostat - harvested areas	Not applicable	Method F	Pesticides				2.2486e-06									1.13528e+08			0	0	0	0.000164084	0	0	0	0	0	0	0	0	8.28434e+09	0	0	0	0	0	6.10211e-10	0	0	0
fenpropathrin	Fenpropathrin	Pesticides (air)	Emissions to air	Emissions to air, unspecified	4d9a8790-3ddd-11dd-90dd-0050c2490048	1094.57	kg	FAOstat - Pesticide usage data	Eurostat - harvested areas	Literature	Method F	Pesticides				1.0258e-06									909909			0	0	0	0.00112281	0	0	0	0	0	0	0	0	9.95961e+08	0	0	0	0	0	4.17562e-09	0	0	0
fenpropathrin	Fenpropathrin	Pesticides (soil)	Emissions to soil	Emissions to soil, unspecified	4d9a8790-3ddd-11dd-90dc-0050c2490048	1459.43	kg	FAOstat - Pesticide usage data	Eurostat - harvested areas	Literature	Method F	Pesticides				3.23365e-08									211651			0	0	0	4.71929e-05	0	0	0	0	0	0	0	0	3.0889e+08	0	0	0	0	0	1.75505e-10	0	0	0
fenpropidin	Fenpropidin		emissions to water	emissions to water, unspecified	08a91e70-3ddc-11dd-93be-0050c2490048	0	kg	Not applicable	Not applicable	Not applicable	Not applicable																	0	0	0	0	0	0	0	0	0	0	0	0	0	0	0	0	0	0	0	0	0	0
fenpropidin	Fenpropidin	Pesticides (surface water)	Emissions to water	Emissions to water, unspecified	08a91e70-3ddc-11dd-93be-0050c2490048	276.299	kg	Literature	Eurostat - harvested areas	Not applicable	Method F	Pesticides																0	0	0	0	0	0	0	0	0	0	0	0	0	0	0	0	0	0	0	0	0	0
fenpropidin	Fenpropidin	Pesticides (air)	Emissions to air	Emissions to air, unspecified	3e4d77b1-6556-11dd-ad8b-0800200c9a66	4144.49	kg	FAOstat - Pesticide usage data	Eurostat - harvested areas	Literature	Method F	Pesticides																0	0	0	0	0	0	0	0	0	0	0	0	0	0	0	0	0	0	0	0	0	0
fenpropidin	Fenpropidin	Pesticides (soil)	Emissions to soil	Emissions to soil, unspecified	08a91e70-3ddc-11dd-93b7-0050c2490048	5525.98	kg	FAOstat - Pesticide usage data	Eurostat - harvested areas	Literature	Method F	Pesticides																0	0	0	0	0	0	0	0	0	0	0	0	0	0	0	0	0	0	0	0	0	0
fenpropimorph	Fenpropimorph		emissions to water	emissions to water, unspecified	fe0acd60-3ddc-11dd-a4ae-0050c2490048	0	kg	Not applicable	Not applicable	Not applicable	Not applicable																	0	0	0	0	0	0	0	0	0	0	0	0	0	0	0	0	0	0	0	0	0	0
fenpropimorph	Fenpropimorph	Pesticides (surface water)	Emissions to water	Emissions to water, unspecified	fe0acd60-3ddc-11dd-a4ae-0050c2490048	5321.85	kg	Literature	Eurostat - harvested areas	Not applicable	Method F	Pesticides																0	0	0	0	0	0	0	0	0	0	0	0	0	0	0	0	0	0	0	0	0	0
fenpropimorph	Fenpropimorph	Pesticides (air)	Emissions to air	Emissions to air, unspecified	3e4d77b6-6556-11dd-ad8b-0800200c9a66	79827.8	kg	FAOstat - Pesticide usage data	Eurostat - harvested areas	Literature	Method F	Pesticides																0	0	0	0	0	0	0	0	0	0	0	0	0	0	0	0	0	0	0	0	0	0
fenpropimorph	Fenpropimorph	Pesticides (soil)	Emissions to soil	Emissions to soil, unspecified	fe0acd60-3ddc-11dd-a4ab-0050c2490048	106437	kg	FAOstat - Pesticide usage data	Eurostat - harvested areas	Literature	Method F	Pesticides																0	0	0	0	0	0	0	0	0	0	0	0	0	0	0	0	0	0	0	0	0	0
fenthion	Fenthion	Pesticides (surface water)	Emissions to water	Emissions to water, unspecified	fe0acd60-3ddc-11dd-a816-0050c2490048	578.864	kg	Literature	Eurostat - harvested areas	Not applicable	Method F	Pesticides				0.000122977									196754			0	0	0	0.0711872	0	0	0	0	0	0	0	0	1.13894e+08	0	0	0	0	0	2.64738e-07	0	0	0
fenthion	Fenthion	Pesticides (air)	Emissions to air	Emissions to air, unspecified	fe0acd60-3ddc-11dd-a4b3-0050c2490048	8682.96	kg	FAOstat - Pesticide usage data	Eurostat - harvested areas	Literature	Method F	Pesticides				7.9492e-06									1000.1			0	0	0	0.0690226	0	0	0	0	0	0	0	0	8.68385e+06	0	0	0	0	0	2.56688e-07	0	0	0
fenthion	Fenthion	Pesticides (soil)	Emissions to soil	Emissions to soil, unspecified	fe0acd60-3ddc-11dd-a4b2-0050c2490048	11577.3	kg	FAOstat - Pesticide usage data	Eurostat - harvested areas	Literature	Method F	Pesticides				1.67419e-06									2443.25			0	0	0	0.0193826	0	0	0	0	0	0	0	0	2.82862e+07	0	0	0	0	0	7.20818e-08	0	0	0
fentin acetate	Fentin acetate	Pesticides (surface water)	Emissions to water	Emissions to water, unspecified	08a91e70-3ddc-11dd-93d1-0050c2490048	241.451	kg	Literature	Eurostat - harvested areas	Not applicable	Method F	Pesticides				4.73465e-05									1.58315e+07			0	0	0	0.0114319	0	0	0	0	0	0	0	0	3.82253e+09	0	0	0	0	0	4.25139e-08	0	0	0
fentin acetate	Fentin acetate	Pesticides (air)	Emissions to air	Emissions to air, unspecified	fe0acd60-3ddc-11dd-a81b-0050c2490048	3621.77	kg	FAOstat - Pesticide usage data	Eurostat - harvested areas	Literature	Method F	Pesticides				4.15217e-05									430614			0	0	0	0.150382	0	0	0	0	0	0	0	0	1.55958e+09	0	0	0	0	0	5.59254e-07	0	0	0
fentin acetate	Fentin acetate	Pesticides (soil)	Emissions to soil	Emissions to soil, unspecified	fe0acd60-3ddc-11dd-a81a-0050c2490048	4829.02	kg	FAOstat - Pesticide usage data	Eurostat - harvested areas	Literature	Method F	Pesticides				1.86792e-08									5875.23			0	0	0	9.0202e-05	0	0	0	0	0	0	0	0	2.83716e+07	0	0	0	0	0	3.35452e-10	0	0	0
fentin hydroxide	Fentin hydroxide	Pesticides (surface water)	Emissions to water	Emissions to water, unspecified	fe0acd60-3ddc-11dd-a5d0-0050c2490048	241.451	kg	Literature	Eurostat - harvested areas	Not applicable	Method F	Pesticides				0.000246115									6.34039e+06			0	0	0	0.0594248	0	0	0	0	0	0	0	0	1.53089e+09	0	0	0	0	0	2.20995e-07	0	0	0
fentin hydroxide	Fentin hydroxide	Pesticides (air)	Emissions to air	Emissions to air, unspecified	fe0acd60-3ddc-11dd-a5ca-0050c2490048	3621.77	kg	FAOstat - Pesticide usage data	Eurostat - harvested areas	Literature	Method F	Pesticides				7.95653e-05									147052			0	0	0	0.288167	0	0	0	0	0	0	0	0	5.32588e+08	0	0	0	0	0	1.07166e-06	0	0	0
fentin hydroxide	Fentin hydroxide	Pesticides (soil)	Emissions to soil	Emissions to soil, unspecified	fe0acd60-3ddc-11dd-a5c9-0050c2490048	4829.02	kg	FAOstat - Pesticide usage data	Eurostat - harvested areas	Literature	Method F	Pesticides				3.55156e-08									813.482			0	0	0	0.000171506	0	0	0	0	0	0	0	0	3.92832e+06	0	0	0	0	0	6.37812e-10	0	0	0
fenuron	Fenuron	Pesticides (surface water)	Emissions to water	Emissions to water, unspecified	4d22aa78-dc86-4d1e-b59e-1fb292a73338	577.103	kg	Literature	Eurostat - harvested areas	Not applicable	Method F	Pesticides													2790.67			0	0	0	0	0	0	0	0	0	0	0	0	1.6105e+06	0	0	0	0	0	0	0	0	0
fenuron	Fenuron	Pesticides (air)	Emissions to air	Emissions to air, unspecified	9f79b21f-a135-40c0-bcbd-a980b046064b	8656.55	kg	FAOstat - Pesticide usage data	Eurostat - harvested areas	Literature	Method F	Pesticides													102.995			0	0	0	0	0	0	0	0	0	0	0	0	891586	0	0	0	0	0	0	0	0	0
fenuron	Fenuron	Pesticides (soil)	Emissions to soil	Emissions to soil, unspecified	1344a6f7-693c-4aa7-bd21-5f4d1aa0d727	39721.1	kg	FAOstat - Pesticide usage data	Eurostat - harvested areas	Literature	Method F	Pesticides													456.283			0	0	0	0	0	0	0	0	0	0	0	0	1.8124e+07	0	0	0	0	0	0	0	0	0
fenvalerate	Fenvalerate	Pesticides (surface water)	Emissions to water	Emissions to water, unspecified	08a91e70-3ddc-11dd-a083-0050c2490048	72.9715	kg	Literature	Eurostat - harvested areas	Not applicable	Method F	Pesticides				3.0519e-05									3.23454e+07			0	0	0	0.00222702	0	0	0	0	0	0	0	0	2.36029e+09	0	0	0	0	0	8.28205e-09	0	0	0
fenvalerate	Fenvalerate	Pesticides (air)	Emissions to air	Emissions to air, unspecified	4d9a8790-3ddd-11dd-90e8-0050c2490048	1094.57	kg	FAOstat - Pesticide usage data	Eurostat - harvested areas	Literature	Method F	Pesticides				3.60452e-06									650674			0	0	0	0.00394541	0	0	0	0	0	0	0	0	7.12209e+08	0	0	0	0	0	1.46726e-08	0	0	0
fenvalerate	Fenvalerate	Pesticides (soil)	Emissions to soil	Emissions to soil, unspecified	4d9a8790-3ddd-11dd-90e7-0050c2490048	1459.43	kg	FAOstat - Pesticide usage data	Eurostat - harvested areas	Literature	Method F	Pesticides				1.8134e-07									190236			0	0	0	0.000264653	0	0	0	0	0	0	0	0	2.77636e+08	0	0	0	0	0	9.84217e-10	0	0	0
ficam	Bendiocarb	Pesticides (surface water)	Emissions to water	Emissions to water, unspecified	fe0acd60-3ddc-11dd-b01a-0050c2490048	425.418	kg	FAOstat - Pesticide usage data	Eurostat - harvested areas	Eurostat - organic farming areas	Method F	Pesticides				2.79582e-05									281202			0	0	0	0.0118939	0	0	0	0	0	0	0	0	1.19628e+08	0	0	0	0	0	4.42322e-08	0	0	0
ficam	Bendiocarb	Pesticides (air)	Emissions to air	Emissions to air, unspecified	fe0acd60-3ddc-11dd-b014-0050c2490048	6381.26	kg	FAOstat - Pesticide usage data	Eurostat - harvested areas	Literature	Method F	Pesticides				8.69141e-06									9274.03			0	0	0	0.0554622	0	0	0	0	0	0	0	0	5.918e+07	0	0	0	0	0	2.06258e-07	0	0	0
ficam	Bendiocarb	Pesticides (soil)	Emissions to soil	Emissions to soil, unspecified	fe0acd60-3ddc-11dd-b013-0050c2490048	8508.35	kg	FAOstat - Pesticide usage data	Eurostat - harvested areas	Eurostat - organic farming areas	Method F	Pesticides				2.29326e-06									22556			0	0	0	0.0195119	0	0	0	0	0	0	0	0	1.91914e+08	0	0	0	0	0	7.25626e-08	0	0	0
fipronil	Fipronil	Pesticides (surface water)	Emissions to water	Emissions to water, unspecified	08a91e70-3ddc-11dd-a08e-0050c2490048	30.1096	kg	Literature	Eurostat - harvested areas	Not applicable	Method F	Pesticides				0.000327342									2.0129e+06			0	0	0	0.00985614	0	0	0	0	0	0	0	0	6.06076e+07	0	0	0	0	0	3.66539e-08	0	0	0
fipronil	Fipronil	Pesticides (air)	Emissions to air	Emissions to air, unspecified	08a91e70-3ddc-11dd-a088-0050c2490048	451.645	kg	FAOstat - Pesticide usage data	Eurostat - harvested areas	Literature	Method F	Pesticides				1.91088e-05									24946.8			0	0	0	0.00863039	0	0	0	0	0	0	0	0	1.12671e+07	0	0	0	0	0	3.20955e-08	0	0	0
fipronil	Fipronil	Pesticides (soil)	Emissions to soil	Emissions to soil, unspecified	08a91e70-3ddc-11dd-a087-0050c2490048	602.193	kg	FAOstat - Pesticide usage data	Eurostat - harvested areas	Literature	Method F	Pesticides				5.25569e-06									32315.1			0	0	0	0.00316494	0	0	0	0	0	0	0	0	1.94599e+07	0	0	0	0	0	1.17701e-08	0	0	0
flamprop-m-isopropyl	Flamprop-M-isopropyl		emissions to air	emissions to air, unspecified	3e4d779d-6556-11dd-ad8b-0800200c9a66	0	kg	Not applicable	Not applicable	Not applicable	Not applicable																	0	0	0	0	0	0	0	0	0	0	0	0	0	0	0	0	0	0	0	0	0	0
fluazifop-p-butyl	Fluazifop-P-butyl	Pesticides (surface water)	Emissions to water	Emissions to water, unspecified	fe0acd60-3ddc-11dd-a5de-0050c2490048	708.054	kg	Literature	Eurostat - harvested areas	Not applicable	Method F	Pesticides													29260.2			0	0	0	0	0	0	0	0	0	0	0	0	2.07178e+07	0	0	0	0	0	0	0	0	0
fluazifop-p-butyl	Fluazifop-P-butyl	Pesticides (air)	Emissions to air	Emissions to air, unspecified	3e4d9ec3-6556-11dd-ad8b-0800200c9a66	10620.8	kg	FAOstat - Pesticide usage data	Eurostat - harvested areas	Literature	Method F	Pesticides													382.893			0	0	0	0	0	0	0	0	0	0	0	0	4.06664e+06	0	0	0	0	0	0	0	0	0
fluazifop-p-butyl	Fluazifop-P-butyl	Pesticides (soil)	Emissions to soil	Emissions to soil, unspecified	fe0acd60-3ddc-11dd-a5db-0050c2490048	52394.1	kg	FAOstat - Pesticide usage data	Eurostat - harvested areas	Literature	Method F	Pesticides													164.643			0	0	0	0	0	0	0	0	0	0	0	0	8.62631e+06	0	0	0	0	0	0	0	0	0
fluazinam	Fluazinam	Pesticides (surface water)	Emissions to water	Emissions to water, unspecified	08a91e70-3ddc-11dd-93ea-0050c2490048	4491.85	kg	FAOstat - Pesticide usage data	Eurostat - harvested areas	Eurostat - organic farming areas	Method F	Pesticides													229045			0	0	0	0	0	0	0	0	0	0	0	0	1.02883e+09	0	0	0	0	0	0	0	0	0
fluazinam	Fluazinam	Pesticides (air)	Emissions to air	Emissions to air, unspecified	08a91e70-3ddc-11dd-93e4-0050c2490048	67377.7	kg	FAOstat - Pesticide usage data	Eurostat - harvested areas	Literature	Method F	Pesticides													8694.83			0	0	0	0	0	0	0	0	0	0	0	0	5.85838e+08	0	0	0	0	0	0	0	0	0
fluazinam	Fluazinam	Pesticides (soil)	Emissions to soil	Emissions to soil, unspecified	08a91e70-3ddc-11dd-93e3-0050c2490048	89836.9	kg	FAOstat - Pesticide usage data	Eurostat - harvested areas	Eurostat - organic farming areas	Method F	Pesticides													264.338			0	0	0	0	0	0	0	0	0	0	0	0	2.37473e+07	0	0	0	0	0	0	0	0	0
flucythrinate	Flucythrinate	Pesticides (surface water)	Emissions to water	Emissions to water, unspecified	08a91e70-3ddc-11dd-a0a3-0050c2490048	72.9715	kg	Literature	Eurostat - harvested areas	Not applicable	Method F	Pesticides				9.80911e-06									3.21547e+07			0	0	0	0.000715785	0	0	0	0	0	0	0	0	2.34638e+09	0	0	0	0	0	2.66193e-09	0	0	0
flucythrinate	Flucythrinate	Pesticides (air)	Emissions to air	Emissions to air, unspecified	4d9a8790-3ddd-11dd-9101-0050c2490048	1094.57	kg	FAOstat - Pesticide usage data	Eurostat - harvested areas	Literature	Method F	Pesticides				2.65797e-06									385901			0	0	0	0.00290934	0	0	0	0	0	0	0	0	4.22396e+08	0	0	0	0	0	1.08195e-08	0	0	0
flucythrinate	Flucythrinate	Pesticides (soil)	Emissions to soil	Emissions to soil, unspecified	4d9a8790-3ddd-11dd-9100-0050c2490048	1459.43	kg	FAOstat - Pesticide usage data	Eurostat - harvested areas	Literature	Method F	Pesticides				4.73157e-09									14848.1			0	0	0	6.90539e-06	0	0	0	0	0	0	0	0	2.16698e+07	0	0	0	0	0	2.56804e-11	0	0	0
fludioxonil	Fludioxonil	Pesticides (surface water)	Emissions to water	Emissions to water, unspecified	4d9a8790-3ddd-11dd-9102-0050c2490048	21.3477	kg	FAOstat - Pesticide usage data	Eurostat - harvested areas	Eurostat - organic farming areas	Method F	Pesticides													101091			0	0	0	0	0	0	0	0	0	0	0	0	2.15807e+06	0	0	0	0	0	0	0	0	0
fludioxonil	Fludioxonil	Pesticides (air)	Emissions to air	Emissions to air, unspecified	08a91e70-3ddc-11dd-a0a8-0050c2490048	320.215	kg	FAOstat - Pesticide usage data	Eurostat - harvested areas	Literature	Method F	Pesticides													1678.72			0	0	0	0	0	0	0	0	0	0	0	0	537551	0	0	0	0	0	0	0	0	0
fludioxonil	Fludioxonil	Pesticides (soil)	Emissions to soil	Emissions to soil, unspecified	08a91e70-3ddc-11dd-a0a7-0050c2490048	426.954	kg	FAOstat - Pesticide usage data	Eurostat - harvested areas	Eurostat - organic farming areas	Method F	Pesticides													2660.18			0	0	0	0	0	0	0	0	0	0	0	0	1.13577e+06	0	0	0	0	0	0	0	0	0
flufenacet	Flufenacet	Pesticides (surface water)	Emissions to water	Emissions to water, unspecified	08a91e70-3ddc-11dd-a0ba-0050c2490048	1225.48	kg	Literature	Eurostat - harvested areas	Not applicable	Method F	Pesticides													168237			0	0	0	0	0	0	0	0	0	0	0	0	2.06171e+08	0	0	0	0	0	0	0	0	0
flufenacet	Flufenacet	Pesticides (air)	Emissions to air	Emissions to air, unspecified	4d9a8790-3ddd-11dd-9107-0050c2490048	18382.2	kg	FAOstat - Pesticide usage data	Eurostat - harvested areas	Literature	Method F	Pesticides													4808.59			0	0	0	0	0	0	0	0	0	0	0	0	8.83924e+07	0	0	0	0	0	0	0	0	0
flufenacet	Flufenacet	Pesticides (soil)	Emissions to soil	Emissions to soil, unspecified	4d9a8790-3ddd-11dd-9106-0050c2490048	90329.3	kg	FAOstat - Pesticide usage data	Eurostat - harvested areas	Literature	Method F	Pesticides													6137.05			0	0	0	0	0	0	0	0	0	0	0	0	5.54356e+08	0	0	0	0	0	0	0	0	0
flumetsulam	Flumetsulam	Pesticides (surface water)	Emissions to water	Emissions to water, unspecified	4d9a8790-3ddd-11dd-910c-0050c2490048	1225.48	kg	Literature	Eurostat - harvested areas	Not applicable	Method F	Pesticides													31207.3			0	0	0	0	0	0	0	0	0	0	0	0	3.82439e+07	0	0	0	0	0	0	0	0	0
flumetsulam	Flumetsulam	Pesticides (air)	Emissions to air	Emissions to air, unspecified	08a91e70-3ddc-11dd-a0ca-0050c2490048	18382.2	kg	FAOstat - Pesticide usage data	Eurostat - harvested areas	Literature	Method F	Pesticides													8710.3			0	0	0	0	0	0	0	0	0	0	0	0	1.60114e+08	0	0	0	0	0	0	0	0	0
flumetsulam	Flumetsulam	Pesticides (soil)	Emissions to soil	Emissions to soil, unspecified	08a91e70-3ddc-11dd-a0c9-0050c2490048	90329.3	kg	FAOstat - Pesticide usage data	Eurostat - harvested areas	Literature	Method F	Pesticides													10219.6			0	0	0	0	0	0	0	0	0	0	0	0	9.23134e+08	0	0	0	0	0	0	0	0	0
fluometuron	Fluometuron	Pesticides (surface water)	Emissions to water	Emissions to water, unspecified	08a91e70-3ddc-11dd-9069-0050c2490048	577.103	kg	Literature	Eurostat - harvested areas	Not applicable	Method F	Pesticides				1.31269e-06									39685.8			0	0	0	0.000757559	0	0	0	0	0	0	0	0	2.29028e+07	0	0	0	0	0	2.81728e-09	0	0	0
fluometuron	Fluometuron	Pesticides (air)	Emissions to air	Emissions to air, unspecified	08a91e70-3ddc-11dd-9c4c-0050c2490048	8656.55	kg	FAOstat - Pesticide usage data	Eurostat - harvested areas	Literature	Method F	Pesticides				7.61213e-07									4739.16			0	0	0	0.00658948	0	0	0	0	0	0	0	0	4.10248e+07	0	0	0	0	0	2.45056e-08	0	0	0
fluometuron	Fluometuron	Pesticides (soil)	Emissions to soil	Emissions to soil, unspecified	08a91e70-3ddc-11dd-9c4b-0050c2490048	39721.1	kg	FAOstat - Pesticide usage data	Eurostat - harvested areas	Literature	Method F	Pesticides				2.78511e-07									8386.99			0	0	0	0.0110628	0	0	0	0	0	0	0	0	3.3314e+08	0	0	0	0	0	4.11413e-08	0	0	0
fluoranthene	Fluoranthene	Industrial releases	emissions to soil	emissions to soil, unspecified	08a91e70-3ddc-11dd-93ee-0050c2490048	0	kg	E-PRTR	Not applicable	Not applicable	Method E					4.20432e-09									67.0374			0	0	0	0	0	0	0	0	0	0	0	0	0	0	0	0	0	0	0	0	0	0
fluoranthene	Fluoranthene		emissions to air	emissions to air, unspecified	fe0acd60-3ddc-11dd-9ee1-0050c2490048	0	kg	EMEP	E-PRTR	Not applicable	Method C	Toxic airborne emissions				1.56759e-07									652.659			0	0	0	0	0	0	0	0	0	0	0	0	0	0	0	0	0	0	0	0	0	0
fluoranthene	Fluoranthene	Non-industrial releases	emissions to water	emissions to water, unspecified	fe0acd60-3ddc-11dd-a5e1-0050c2490048	2566.16	kg	Waterbase	Eurostat - WWTP-connection stats	Not applicable	Method D2	Toxic waterborne emissions				3.91034e-06									95840.5			0	0	0	0.0100345	0	0	0	0	0	0	0	0	2.45942e+08	0	0	0	0	0	3.73174e-08	0	0	0
fluoranthene	Fluoranthene	Industrial releases	emissions to water	emissions to water, unspecified	fe0acd60-3ddc-11dd-a5e1-0050c2490048	385891	kg	E-PRTR	EUROSTAT - economic data	Not applicable	Method D1	Toxic waterborne emissions				3.91034e-06									95840.5			0	0	0	1.50897	0	0	0	0	0	0	0	0	3.6984e+10	0	0	0	0	0	5.61169e-06	0	0	0
fluorene	fluorene		emissions to water	emissions to water, unspecified	08a91e70-3ddc-11dd-a0d3-0050c2490048	0	kg	Not applicable	Not applicable	Not applicable	Not applicable					2.72846e-07									2825.69			0	0	0	0	0	0	0	0	0	0	0	0	0	0	0	0	0	0	0	0	0	0
fluorene	fluorene		emissions to soil	emissions to soil, unspecified	08a91e70-3ddc-11dd-a0d0-0050c2490048	0	kg	Not applicable	Not applicable	Not applicable	Not applicable					2.04364e-09									5.0741			0	0	0	0	0	0	0	0	0	0	0	0	0	0	0	0	0	0	0	0	0	0
fluorodifen	Fluorodifen	Pesticides (surface water)	Emissions to water	Emissions to water, unspecified	0832fb73-1383-4541-87a6-b3b74fc54adc	519.524	kg	FAOstat - Pesticide usage data	Eurostat - harvested areas	Eurostat - organic farming areas	Method F	Pesticides													7988.99			0	0	0	0	0	0	0	0	0	0	0	0	4.15047e+06	0	0	0	0	0	0	0	0	0
fluorodifen	Fluorodifen	Pesticides (air)	Emissions to air	Emissions to air, unspecified	06775c53-3266-4a39-ba02-536c4cf92598	7792.86	kg	FAOstat - Pesticide usage data	Eurostat - harvested areas	Literature	Method F	Pesticides													320.088			0	0	0	0	0	0	0	0	0	0	0	0	2.4944e+06	0	0	0	0	0	0	0	0	0
fluorodifen	Fluorodifen	Pesticides (soil)	Emissions to soil	Emissions to soil, unspecified	47d54f07-f696-492c-ab4e-91425df98982	38428.7	kg	FAOstat - Pesticide usage data	Eurostat - harvested areas	Eurostat - organic farming areas	Method F	Pesticides													28.0511			0	0	0	0	0	0	0	0	0	0	0	0	1.07797e+06	0	0	0	0	0	0	0	0	0
fluorspar	Fluorspar containing by weight <= 97% of calcium fluoride		resource flows	Non-renewable material resources from ground	08a91e70-3ddc-11dd-97f7-0050c2490048	1.24724e+07	kg	Eurostat - Prodcom	Not applicable	Not applicable	Method K3	Time interpolation for resource depletion - metal ores and minerals															0.00262	0	0	0	0	0	0	0	0	0	0	0	0	0	0	32677.8	0	0	0	0	0	0	0
fluorspar	Fluorspar containing by weight > 97% of calcium fluoride		resource flows	Non-renewable material resources from ground	08a91e70-3ddc-11dd-97f7-0050c2490048	118593000	kg	Eurostat - Prodcom	Not applicable	Not applicable	Method K3	Time interpolation for resource depletion - metal ores and minerals															0.00262	0	0	0	0	0	0	0	0	0	0	0	0	0	0	310714	0	0	0	0	0	0	0
fluroxypyr	Fluroxypyr	Pesticides (surface water)	Emissions to water	Emissions to water, unspecified	fe0acd60-3ddc-11dd-a5ed-0050c2490048	313.37	kg	FAOstat - Pesticide usage data	Eurostat - harvested areas	Eurostat - organic farming areas	Method F	Pesticides													2920.96			0	0	0	0	0	0	0	0	0	0	0	0	915341	0	0	0	0	0	0	0	0	0
fluroxypyr	Fluroxypyr	Pesticides (air)	Emissions to air	Emissions to air, unspecified	08a91e70-3ddc-11dd-a095-0050c2490048	4700.55	kg	FAOstat - Pesticide usage data	Eurostat - harvested areas	Literature	Method F	Pesticides													476.663			0	0	0	0	0	0	0	0	0	0	0	0	2.24058e+06	0	0	0	0	0	0	0	0	0
fluroxypyr	Fluroxypyr	Pesticides (soil)	Emissions to soil	Emissions to soil, unspecified	fe0acd60-3ddc-11dd-a5ea-0050c2490048	23104.3	kg	FAOstat - Pesticide usage data	Eurostat - harvested areas	Eurostat - organic farming areas	Method F	Pesticides													1116.7			0	0	0	0	0	0	0	0	0	0	0	0	2.58007e+07	0	0	0	0	0	0	0	0	0
flusilazole	Flusilazole	Pesticides (surface water)	Emissions to water	Emissions to water, unspecified	08a91e70-3ddc-11dd-a109-0050c2490048	1488.53	kg	Literature	Eurostat - harvested areas	Not applicable	Method F	Pesticides																0	0	0	0	0	0	0	0	0	0	0	0	0	0	0	0	0	0	0	0	0	0
flusilazole	Flusilazole	Pesticides (air)	Emissions to air	Emissions to air, unspecified	08a91e70-3ddc-11dd-a103-0050c2490048	22328	kg	FAOstat - Pesticide usage data	Eurostat - harvested areas	Literature	Method F	Pesticides																0	0	0	0	0	0	0	0	0	0	0	0	0	0	0	0	0	0	0	0	0	0
flusilazole	Flusilazole	Pesticides (soil)	Emissions to soil	Emissions to soil, unspecified	08a91e70-3ddc-11dd-a102-0050c2490048	29770.7	kg	FAOstat - Pesticide usage data	Eurostat - harvested areas	Literature	Method F	Pesticides																0	0	0	0	0	0	0	0	0	0	0	0	0	0	0	0	0	0	0	0	0	0
flutolanil	Flutolanil	Pesticides (surface water)	Emissions to water	Emissions to water, unspecified	fe0acd60-3ddc-11dd-a508-0050c2490048	156.848	kg	Literature	Eurostat - harvested areas	Not applicable	Method F	Pesticides				9.9226e-07									7644.98			0	0	0	0.000155634	0	0	0	0	0	0	0	0	1.1991e+06	0	0	0	0	0	5.78787e-10	0	0	0
flutolanil	Flutolanil	Pesticides (air)	Emissions to air	Emissions to air, unspecified	4d9a8790-3ddd-11dd-8e0a-0050c2490048	2352.72	kg	FAOstat - Pesticide usage data	Eurostat - harvested areas	Literature	Method F	Pesticides				1.08556e-07									84.4146			0	0	0	0.000255401	0	0	0	0	0	0	0	0	198604	0	0	0	0	0	9.49811e-10	0	0	0
flutolanil	Flutolanil	Pesticides (soil)	Emissions to soil	Emissions to soil, unspecified	4d9a8790-3ddd-11dd-8e09-0050c2490048	3136.97	kg	FAOstat - Pesticide usage data	Eurostat - harvested areas	Literature	Method F	Pesticides				1.21905e-08									93.8705			0	0	0	3.82411e-05	0	0	0	0	0	0	0	0	294469	0	0	0	0	0	1.42215e-10	0	0	0
folpet	Folpet	Pesticides (surface water)	Emissions to water	Emissions to water, unspecified	08a91e70-3ddc-11dd-9415-0050c2490048	22755.4	kg	Literature	Eurostat - harvested areas	Not applicable	Method F	Pesticides			2.41072e-07	8.35921e-07									1.12689e+06			0	0	0.0054857	0.0190217	0	0	0	0	0	0	0	0	2.56429e+10	0	0	0	0	2.92137e-07	7.07399e-08	0	0	0
folpet	Folpet	Pesticides (air)	Emissions to air	Emissions to air, unspecified	fe0acd60-3ddc-11dd-a5f2-0050c2490048	341332	kg	FAOstat - Pesticide usage data	Eurostat - harvested areas	Literature	Method F	Pesticides			8.72272e-08	3.02461e-07									121250			0	0	0.0297734	0.10324	0	0	0	0	0	0	0	0	4.13865e+10	0	0	0	0	1.58556e-06	3.83937e-07	0	0	0
folpet	Folpet	Pesticides (soil)	Emissions to soil	Emissions to soil, unspecified	fe0acd60-3ddc-11dd-a5f1-0050c2490048	455109	kg	FAOstat - Pesticide usage data	Eurostat - harvested areas	Literature	Method F	Pesticides			8.53291e-08	2.9588e-07									381054			0	0	0.038834	0.134657	0	0	0	0	0	0	0	0	1.73421e+11	0	0	0	0	2.06808e-06	5.00777e-07	0	0	0
fonofos	Fonofos	Pesticides (surface water)	Emissions to water	Emissions to water, unspecified	08a91e70-3ddc-11dd-a11b-0050c2490048	578.864	kg	Literature	Eurostat - harvested areas	Not applicable	Method F	Pesticides				3.5181e-05									3.04547e+06			0	0	0	0.020365	0	0	0	0	0	0	0	0	1.76291e+09	0	0	0	0	0	7.57353e-08	0	0	0
fonofos	Fonofos	Pesticides (air)	Emissions to air	Emissions to air, unspecified	08a91e70-3ddc-11dd-a115-0050c2490048	8682.96	kg	FAOstat - Pesticide usage data	Eurostat - harvested areas	Literature	Method F	Pesticides				2.98563e-06									6614.8			0	0	0	0.0259241	0	0	0	0	0	0	0	0	5.74361e+07	0	0	0	0	0	9.64091e-08	0	0	0
fonofos	Fonofos	Pesticides (soil)	Emissions to soil	Emissions to soil, unspecified	08a91e70-3ddc-11dd-a114-0050c2490048	11577.3	kg	FAOstat - Pesticide usage data	Eurostat - harvested areas	Literature	Method F	Pesticides				7.84799e-07									60338.6			0	0	0	0.00908584	0	0	0	0	0	0	0	0	6.98556e+08	0	0	0	0	0	3.37893e-08	0	0	0
forest	*Forest land remaining Forest land	UNFCCC LULUCF - no disaggregation among forest types available	resource flows	Land occupation	641d3aa1-93d3-4fb2-9bd8-17600536c3c0	1.53947e+12	m2*a	UNFCCC LULUCF	Not applicable	Not applicable	method R													2				0	0	0	0	0	0	0	0	0	0	0	3.07894e+12	0	0	0	0	0	0	0	0	0	0
formaldehyde	formaldehyde		emissions to water	emissions to water, unspecified	08a91e70-3ddc-11dd-9421-0050c2490048	0	kg	Not applicable	Not applicable	Not applicable	Not applicable				1.24088e-07	3.23588e-07									297.421			0	0	0	0	0	0	0	0	0	0	0	0	0	0	0	0	0	0	0	0	0	0
formaldehyde	formaldehyde		emissions to soil	emissions to soil, unspecified	08a91e70-3ddc-11dd-941a-0050c2490048	0	kg	Not applicable	Not applicable	Not applicable	Not applicable				2.76018e-07	9.9611e-08									83.9612			0	0	0	0	0	0	0	0	0	0	0	0	0	0	0	0	0	0	0	0	0	0
formaldehyde	formaldehyde		emissions to air	emissions to air, unspecified	08a91e70-3ddc-11dd-941b-0050c2490048	3.90854e+08	kg	EMEP	E-PRTR	Literature	Method A	NMVOC breakdown estimates			1.34037e-05	1.71068e-07			0.877						26.8037			0	0	5238.88	66.8625	0	0	3.42779e+08	0	0	0	0	0	1.04763e+10	0	0	0	0	0.278993	0.000248655	0	0	0.0216854
formic acid	formic acid		emissions to water	emissions to water, unspecified	d86c88ee-6555-11dd-ad8b-0800200c9a66	0	kg	Not applicable	Not applicable	Not applicable	Not applicable														44.3986			0	0	0	0	0	0	0	0	0	0	0	0	0	0	0	0	0	0	0	0	0	0
formic acid	formic acid		emissions to soil	emissions to soil, unspecified	d86c88ed-6555-11dd-ad8b-0800200c9a66	0	kg	Not applicable	Not applicable	Not applicable	Not applicable														11.1766			0	0	0	0	0	0	0	0	0	0	0	0	0	0	0	0	0	0	0	0	0	0
formic acid	formic acid		emissions to air	emissions to air, unspecified	08a91e70-3ddc-11dd-9424-0050c2490048	1.05619e+06	kg	EMEP	E-PRTR	Literature	Method A	NMVOC breakdown estimates							0.0541						9.08236			0	0	0	0	0	0	57139.8	0	0	0	0	0	9.59267e+06	0	0	0	0	0	0	0	0	3.61487e-06
formothion	Formothion	Pesticides (surface water)	Emissions to water	Emissions to water, unspecified	08a91e70-3ddc-11dd-9430-0050c2490048	578.864	kg	Literature	Eurostat - harvested areas	Not applicable	Method F	Pesticides				6.22583e-06									743.289			0	0	0	0.00360391	0	0	0	0	0	0	0	0	430263	0	0	0	0	0	1.34026e-08	0	0	0
formothion	Formothion	Pesticides (air)	Emissions to air	Emissions to air, unspecified	08a91e70-3ddc-11dd-942a-0050c2490048	8682.96	kg	FAOstat - Pesticide usage data	Eurostat - harvested areas	Literature	Method F	Pesticides				2.08538e-06									24.7046			0	0	0	0.0181072	0	0	0	0	0	0	0	0	214509	0	0	0	0	0	6.73389e-08	0	0	0
formothion	Formothion	Pesticides (soil)	Emissions to soil	Emissions to soil, unspecified	08a91e70-3ddc-11dd-9429-0050c2490048	11577.3	kg	FAOstat - Pesticide usage data	Eurostat - harvested areas	Literature	Method F	Pesticides				1.47654e-06									176.274			0	0	0	0.0170943	0	0	0	0	0	0	0	0	2.04077e+06	0	0	0	0	0	6.35721e-08	0	0	0
freshwater, OECD average scarcity	2. Total gross freshwater abstraction	the UUID is mapped to OECD average scarcity CF	resource flows	Renewable material resources from water	ceaf2f45-5b08-4ba5-b669-c783e1940c82	250638827868096	kg	Eurostat - Water	Not applicable	Not applicable	Method J1															0.000162		0	0	0	0	0	0	0	0	0	0	0	0	0	4.06035e+10	0	0	0	0	0	0	0	0
from agriculture	from Cropland	UNFCCC LULUCF - it is mapped as "from" transformation	resource flows	Land transformation	c0143eba-3daf-44ad-8d34-6e1d34128ace	2.48543e+09	m2	UNFCCC LULUCF	Not applicable	Not applicable	method R													-485				0	0	0	0	0	0	0	0	0	0	0	-1.20543e+12	0	0	0	0	0	0	0	0	0	0
from artificial areas	from Settlements	UNFCCC LULUCF - it is mapped as "from" transformation	resource flows	Land transformation	9db48d2d-17e8-4b4c-b439-2aab1c3d80f2	0	m2	UNFCCC LULUCF	Not applicable	Not applicable	method R													-7400				0	0	0	0	0	0	0	0	0	0	0	0	0	0	0	0	0	0	0	0	0	0
from forest	from Forest	UNFCCC LULUCF - it is mapped as "from" transformation	resource flows	Land transformation	25a53117-7717-41f6-9085-64b1728c9b0d	0	m2	UNFCCC LULUCF	Not applicable	Not applicable	method R													-20				0	0	0	0	0	0	0	0	0	0	0	0	0	0	0	0	0	0	0	0	0	0
from grassland/pasture/meadow	from Grassland	UNFCCC LULUCF - it is mapped as "from" transformation	resource flows	Land transformation	32e9ce57-5c64-44fe-ba5f-e29adb467eb7	1.45491e+09	m2	UNFCCC LULUCF	Not applicable	Not applicable	method R													-125				0	0	0	0	0	0	0	0	0	0	0	-1.81864e+11	0	0	0	0	0	0	0	0	0	0
from unspecified	from Other land	UNFCCC LULUCF - it is mapped as "from" transformation	resource flows	Land transformation	52a7fc6d-de3b-4348-9ef2-11b119da6c98	0	m2	UNFCCC LULUCF	Not applicable	Not applicable	method R													-1720				0	0	0	0	0	0	0	0	0	0	0	0	0	0	0	0	0	0	0	0	0	0
from wetlands	from Wetland	UNFCCC LULUCF - it is mapped as "from" transformation	resource flows	Land transformation	651df0ec-3468-4453-aa11-dc197034517f	0	m2	UNFCCC LULUCF	Not applicable	Not applicable	method R													0				0	0	0	0	0	0	0	0	0	0	0	0	0	0	0	0	0	0	0	0	0	0
fuberidazole	Fuberidazole	Pesticides (surface water)	Emissions to water	Emissions to water, unspecified	8b4f2a6a-3aae-4ad2-acfd-7b4092212117	1137.99	kg	Literature	Eurostat - harvested areas	Not applicable	Method F	Pesticides													5507.47			0	0	0	0	0	0	0	0	0	0	0	0	6.26746e+06	0	0	0	0	0	0	0	0	0
fuberidazole	Fuberidazole	Pesticides (air)	Emissions to air	Emissions to air, unspecified	5db54c6c-2f38-4ed1-92f7-0968eb6e3e40	17069.9	kg	FAOstat - Pesticide usage data	Eurostat - harvested areas	Literature	Method F	Pesticides													59.5928			0	0	0	0	0	0	0	0	0	0	0	0	1.01724e+06	0	0	0	0	0	0	0	0	0
fuberidazole	Fuberidazole	Pesticides (soil)	Emissions to soil	Emissions to soil, unspecified	114db26c-9a0b-438a-9f78-906bb3574930	22759.8	kg	FAOstat - Pesticide usage data	Eurostat - harvested areas	Literature	Method F	Pesticides													10.744			0	0	0	0	0	0	0	0	0	0	0	0	244532	0	0	0	0	0	0	0	0	0
furan	furan		emissions to water	emissions to water, unspecified	08a91e70-3ddc-11dd-a138-0050c2490048	0	kg	Not applicable	Not applicable	Not applicable	Not applicable				2.43858e-05	2.71955e-06									47.3033			0	0	0	0	0	0	0	0	0	0	0	0	0	0	0	0	0	0	0	0	0	0
furan	furan		emissions to soil	emissions to soil, unspecified	08a91e70-3ddc-11dd-a135-0050c2490048	0	kg	Not applicable	Not applicable	Not applicable	Not applicable				1.48125e-06	1.65192e-07									0.728686			0	0	0	0	0	0	0	0	0	0	0	0	0	0	0	0	0	0	0	0	0	0
furan	furane		emissions to air	emissions to air, unspecified	fe0acd60-3ddc-11dd-a632-0050c2490048	1.71936e+07	kg	EMEP	E-PRTR	Literature	Method A	NMVOC breakdown estimates			3.20913e-05	3.57888e-06									0.00255571			0	0	551.765	61.5339	0	0	0	0	0	0	0	0	43941.9	0	0	0	0	0.0293838	0.000228838	0	0	0
furfural	Furfural		emissions to air	emissions to air, unspecified	4d9a8790-3ddd-11dd-918f-0050c2490048	807282	kg	EMEP	E-PRTR	Literature	Method A	NMVOC breakdown estimates			4.34566e-09	1.50219e-06									2.99469			0	0	0.00350817	1.21269	0	0	0	0	0	0	0	0	2.41756e+06	0	0	0	0	1.86825e-07	4.50986e-06	0	0	0
gallium	Gallium	metal content	resource flows	Non-renewable element resources from ground	08a91e70-3ddc-11dd-9438-0050c2490048	4000	kg	World Mining Data	Not applicable	Not applicable	Method K3																2.48e-06	0	0	0	0	0	0	0	0	0	0	0	0	0	0	0.00992	0	0	0	0	0	0	0
germanium	Germanium	metal content - not mined in EU27	resource flows	Non-renewable element resources from ground	08a91e70-3ddc-11dd-9439-0050c2490048	0	kg	British Geological Survey	Not applicable	Not applicable	Method K3																19500	0	0	0	0	0	0	0	0	0	0	0	0	0	0	0	0	0	0	0	0	0	0
glufosinate ammonium salt	Glufosinate	Pesticides (surface water)	Emissions to water	Emissions to water, unspecified	08a91e70-3ddc-11dd-943e-0050c2490048	6955.94	kg	Literature	Eurostat - harvested areas	Not applicable	Method F	Pesticides				2.52458e-06									578.555			0	0	0	0.0175608	0	0	0	0	0	0	0	0	4.02439e+06	0	0	0	0	0	6.5307e-08	0	0	0
glufosinate ammonium salt	Glufosinate	Pesticides (air)	Emissions to air	Emissions to air, unspecified	4d9a8790-3ddd-11dd-8e11-0050c2490048	104339	kg	FAOstat - Pesticide usage data	Eurostat - harvested areas	Literature	Method F	Pesticides				1.20369e-06									12.4538			0	0	0	0.125592	0	0	0	0	0	0	0	0	1.29942e+06	0	0	0	0	0	4.67063e-07	0	0	0
glufosinate ammonium salt	Glufosinate	Pesticides (soil)	Emissions to soil	Emissions to soil, unspecified	08a91e70-3ddc-11dd-943b-0050c2490048	391547	kg	FAOstat - Pesticide usage data	Eurostat - harvested areas	Literature	Method F	Pesticides				7.3405e-08									16.8221			0	0	0	0.0287415	0	0	0	0	0	0	0	0	6.58666e+06	0	0	0	0	0	1.06887e-07	0	0	0
glutaraldehyde	glutaraldehyde		emissions to water	emissions to water, unspecified	fe0acd60-3ddc-11dd-a63e-0050c2490048	0	kg	Not applicable	Not applicable	Not applicable	Not applicable														2834.66			0	0	0	0	0	0	0	0	0	0	0	0	0	0	0	0	0	0	0	0	0	0
glutaraldehyde	glutaraldehyde		emissions to soil	emissions to soil, unspecified	08a91e70-3ddc-11dd-a15f-0050c2490048	0	kg	Not applicable	Not applicable	Not applicable	Not applicable														761.21			0	0	0	0	0	0	0	0	0	0	0	0	0	0	0	0	0	0	0	0	0	0
glyoxal	glyoxal		emissions to air	emissions to air, unspecified	fe0acd60-3ddc-11dd-a640-0050c2490048	1.13407e+06	kg	EMEP	E-PRTR	Literature	Method A	NMVOC breakdown estimates													4.91742			0	0	0	0	0	0	0	0	0	0	0	0	5.57669e+06	0	0	0	0	0	0	0	0	0
glyphosate	Glyphosate	Pesticides (surface water)	Emissions to water	Emissions to water, unspecified	fe0acd60-3ddc-11dd-a64c-0050c2490048	170472	kg	Literature	Eurostat - harvested areas	Not applicable	Method F	Pesticides				1.60465e-07									321.084			0	0	0	0.0273548	0	0	0	0	0	0	0	0	5.47359e+07	0	0	0	0	0	1.0173e-07	0	0	0
glyphosate	Glyphosate	Pesticides (air)	Emissions to air	Emissions to air, unspecified	fe0acd60-3ddc-11dd-a646-0050c2490048	2.55708e+06	kg	FAOstat - Pesticide usage data	Eurostat - harvested areas	Literature	Method F	Pesticides				5.7861e-08									14.0821			0	0	0	0.147955	0	0	0	0	0	0	0	0	3.60093e+07	0	0	0	0	0	5.50231e-07	0	0	0
glyphosate	Glyphosate	Pesticides (soil)	Emissions to soil	Emissions to soil, unspecified	fe0acd60-3ddc-11dd-a645-0050c2490048	1.1212e+07	kg	FAOstat - Pesticide usage data	Eurostat - harvested areas	Literature	Method F	Pesticides				5.19472e-08									103.944			0	0	0	0.58243	0	0	0	0	0	0	0	0	1.16542e+09	0	0	0	0	0	2.166e-06	0	0	0
gold	Gold ores - metal content	metal content	resource flows	Non-renewable element resources from ground	fe0acd60-3ddc-11dd-a2bf-0050c2490048	18413	kg	British Geological Survey	Not applicable	Not applicable	Method K3																36	0	0	0	0	0	0	0	0	0	0	0	0	0	0	662868	0	0	0	0	0	0	0
granite	Granite, crude or roughly trimmed		resource flows	Non-renewable material resources from ground	08a91e70-3ddc-11dd-9449-0050c2490048	9.02153e+09	kg	Eurostat - Prodcom	Not applicable	Not applicable	method K3																	0	0	0	0	0	0	0	0	0	0	0	0	0	0	0	0	0	0	0	0	0	0
grassland	*Grassland remaining Grassland	UNFCCC LULUCF	resource flows	Land occupation	82801171-9dd0-428e-9cb5-1e9c4211b2f7	6.97566e+11	m2*a	UNFCCC LULUCF	Not applicable	Not applicable	method R													5				0	0	0	0	0	0	0	0	0	0	0	3.48783e+12	0	0	0	0	0	0	0	0	0	0
gravel	Gravel; pebbles; shingle and flint of a kind used for concrete aggregates; for road metalling or for railway or other ballast		resource flows	Non-renewable material resources from ground	fe0acd60-3ddc-11dd-aa36-0050c2490048	0	kg	Eurostat - prodcom	Not applicable	Not applicable	missing in statistics																	0	0	0	0	0	0	0	0	0	0	0	0	0	0	0	0	0	0	0	0	0	0
gypsum	Gypsum and anhydrite		resource flows	Non-renewable material resources from ground	08a91e70-3ddc-11dd-97f8-0050c2490048	2.2249e+10	kg	Eurostat - Prodcom	Not applicable	Not applicable	method K3																	0	0	0	0	0	0	0	0	0	0	0	0	0	0	0	0	0	0	0	0	0	0
Halon-1001	Bromomethane Halon-1001	missing	emissions to air	emissions to air, unspecified	fe0acd60-3ddc-11dd-a8ef-0050c2490048	0	kg	Not applicable	Not applicable	Not applicable	missing		5	0.38		9.55442e-05									11.644			0	0	0	0	0	0	0	0	0	0	0	0	0	0	0	0	0	0	0	0	0	0
Halon-1001	Halon-1001		emissions to water	emissions to water, unspecified	fe0acd60-3ddc-11dd-a8f5-0050c2490048	0	kg	Not applicable	Not applicable	Not applicable	Not applicable					6.11274e-05									1586.96			0	0	0	0	0	0	0	0	0	0	0	0	0	0	0	0	0	0	0	0	0	0
Halon-1001	Halon-1001		emissions to soil	emissions to soil, unspecified	fe0acd60-3ddc-11dd-a8ee-0050c2490048	0	kg	Not applicable	Not applicable	Not applicable	Not applicable					6.71899e-05									50.6326			0	0	0	0	0	0	0	0	0	0	0	0	0	0	0	0	0	0	0	0	0	0
Halon-1011	Bromochloromethane - Halon 1011	missing	emissions to air	emissions to air, unspecified	fe0acd60-3ddc-11dd-a617-0050c2490048	0	kg	Not applicable	Not applicable	Not applicable	missing														0.797891			0	0	0	0	0	0	0	0	0	0	0	0	0	0	0	0	0	0	0	0	0	0
Halon-1011	Halon-1011		emissions to water	emissions to water, unspecified	d86cd700-6555-11dd-ad8b-0800200c9a66	0	kg	Not applicable	Not applicable	Not applicable	Not applicable														65.0243			0	0	0	0	0	0	0	0	0	0	0	0	0	0	0	0	0	0	0	0	0	0
Halon-1011	Halon-1011		emissions to soil	emissions to soil, unspecified	d86cd6ff-6555-11dd-ad8b-0800200c9a66	0	kg	Not applicable	Not applicable	Not applicable	Not applicable														3.90799			0	0	0	0	0	0	0	0	0	0	0	0	0	0	0	0	0	0	0	0	0	0
Halon-1201	Bromodifluoromethane Halon-1201	missing	emissions to air	emissions to air, unspecified	08a91e70-3ddc-11dd-90c6-0050c2490048	0	kg	Not applicable	Not applicable	Not applicable	missing		404	1.4														0	0	0	0	0	0	0	0	0	0	0	0	0	0	0	0	0	0	0	0	0	0
Halon-1202	Difluorodibromomethane Halon-1202	missing	emissions to air	emissions to air, unspecified	fe0acd60-3ddc-11dd-9eea-0050c2490048	0	kg	Not applicable	Not applicable	Not applicable	missing			1.3														0	0	0	0	0	0	0	0	0	0	0	0	0	0	0	0	0	0	0	0	0	0
Halon-1211	Bromochlorodifluoromethane Halon-1211	missing	emissions to air	emissions to air, unspecified	fe0acd60-3ddc-11dd-a8f8-0050c2490048	0	kg	Not applicable	Not applicable	Not applicable	missing		1890	6														0	0	0	0	0	0	0	0	0	0	0	0	0	0	0	0	0	0	0	0	0	0
Halon-1301	Bromotrifluoromethane Halon-1301	missing	emissions to air	emissions to air, unspecified	fe0acd60-3ddc-11dd-a909-0050c2490048	0	kg	Not applicable	Not applicable	Not applicable	missing		7140	12														0	0	0	0	0	0	0	0	0	0	0	0	0	0	0	0	0	0	0	0	0	0
Halon-2311	2-bromo-2-chloro-1,1,1-trifluoroethane Halon-2311	missing	emissions to air	emissions to air, unspecified	fe0acd60-3ddc-11dd-a348-0050c2490048	0	kg	Not applicable	Not applicable	Not applicable	missing			0.14											0.23498			0	0	0	0	0	0	0	0	0	0	0	0	0	0	0	0	0	0	0	0	0	0
Halon-2311	Halon-2311		emissions to water	emissions to water, unspecified	041fd239-6556-11dd-ad8b-0800200c9a66	0	kg	Not applicable	Not applicable	Not applicable	Not applicable														79.9807			0	0	0	0	0	0	0	0	0	0	0	0	0	0	0	0	0	0	0	0	0	0
Halon-2311	Halon-2311		emissions to soil	emissions to soil, unspecified	041fd238-6556-11dd-ad8b-0800200c9a66	0	kg	Not applicable	Not applicable	Not applicable	Not applicable														1.62343			0	0	0	0	0	0	0	0	0	0	0	0	0	0	0	0	0	0	0	0	0	0
Halon-2401	1,1,1,2-tetrafluoro-2-bromoethane Halon-2401	missing	emissions to air	emissions to air, unspecified	08a91e70-3ddc-11dd-9456-0050c2490048	0	kg	Not applicable	Not applicable	Not applicable	missing			0.25														0	0	0	0	0	0	0	0	0	0	0	0	0	0	0	0	0	0	0	0	0	0
Halon-2402	1,2-dibromo-1,1,2,2-tetrafluoroethane Halon-2402	missing	emissions to air	emissions to air, unspecified	08a91e70-3ddc-11dd-945a-0050c2490048	0	kg	Not applicable	Not applicable	Not applicable	missing		1640	6														0	0	0	0	0	0	0	0	0	0	0	0	0	0	0	0	0	0	0	0	0	0
haloxyfop ethoxyethyl ester	Haloxyfop-ethoxyethyl		emissions to air	emissions to air, unspecified	64b1a730-6556-11dd-ad8b-0800200c9a66	0	kg	Not applicable	Not applicable	Not applicable	Not applicable														433.301			0	0	0	0	0	0	0	0	0	0	0	0	0	0	0	0	0	0	0	0	0	0
hard coal; 26.3 MJ/kg	Hard coal [MJ]	energy equivalent	resource flows	Non-renewable energy resources from ground	fe0acd60-3ddc-11dd-a6fc-0050c2490048	3052560000000	MJ	Eurostat - Energy	Not applicable	Not applicable	Method K2																7.79e-09	0	0	0	0	0	0	0	0	0	0	0	0	0	0	23779.4	0	0	0	0	0	0	0
HCFC-123	2,2-dichloro-1,1,1-tri-fluoroethane HCFC-123	missing	emissions to air	emissions to air, unspecified	fe0acd60-3ddc-11dd-a344-0050c2490048	0	kg	Not applicable	Not applicable	Not applicable	missing		77	0.02	4.33591e-08										0.364638			0	0	0	0	0	0	0	0	0	0	0	0	0	0	0	0	0	0	0	0	0	0
HCFC-123	HCFC-123		emissions to water	emissions to water, unspecified	08a91e70-3ddc-11dd-9f35-0050c2490048	0	kg	Not applicable	Not applicable	Not applicable	Not applicable				4.01077e-08										121.139			0	0	0	0	0	0	0	0	0	0	0	0	0	0	0	0	0	0	0	0	0	0
HCFC-123	HCFC-123		emissions to soil	emissions to soil, unspecified	08a91e70-3ddc-11dd-9f32-0050c2490048	0	kg	Not applicable	Not applicable	Not applicable	Not applicable				3.43505e-08										2.1524			0	0	0	0	0	0	0	0	0	0	0	0	0	0	0	0	0	0	0	0	0	0
HCFC-124	2-chloro-1,1,1,2-tetrafluoroethane HCFC-124	missing	emissions to air	emissions to air, unspecified	fe0acd60-3ddc-11dd-ab9c-0050c2490048	0	kg	Not applicable	Not applicable	Not applicable	missing		609	0.02														0	0	0	0	0	0	0	0	0	0	0	0	0	0	0	0	0	0	0	0	0	0
HCFC-140	HCFC-140	missing	emissions to air	emissions to air, unspecified	d86cafdf-6555-11dd-ad8b-0800200c9a66	0	kg	Not applicable	Not applicable	Not applicable	missing		146			1.77309e-08			0.0152						0.204953			0	0	0	0	0	0	0	0	0	0	0	0	0	0	0	0	0	0	0	0	0	0
HCFC-141b	HCFC-141b		emissions to water	emissions to water, unspecified	08a91e70-3ddc-11dd-9f17-0050c2490048	0	kg	Not applicable	Not applicable	Not applicable	Not applicable				4.06305e-08													0	0	0	0	0	0	0	0	0	0	0	0	0	0	0	0	0	0	0	0	0	0
HCFC-141b	HCFC-141b		emissions to soil	emissions to soil, unspecified	08a91e70-3ddc-11dd-9f14-0050c2490048	0	kg	Not applicable	Not applicable	Not applicable	Not applicable				3.96863e-08													0	0	0	0	0	0	0	0	0	0	0	0	0	0	0	0	0	0	0	0	0	0
HCFC-141b	HCFC-141b		emissions to air	emissions to air, unspecified	fe0acd60-3ddc-11dd-aba0-0050c2490048	490917	kg	EMEP	E-PRTR	Edgar	Method B	Ozone-depleting substances	725	0.12	4.55644e-08													3.55915e+08	58910.1	0.0223684	0	0	0	0	0	0	0	0	0	0	0	0	7.73657e-05	0.00543275	1.19121e-06	0	0	0	0
HCFC-142b	HCFC-142b		emissions to air	emissions to air, unspecified	d217e3a3-24b6-4214-8ca1-8c2f3ac4fedf	36886.4	kg	EMEP	E-PRTR	Edgar	Method B	Ozone-depleting substances	2310	0.07														8.52075e+07	2582.05	0	0	0	0	0	0	0	0	0	0	0	0	0	1.85217e-05	0.000238119	0	0	0	0	0
HCFC-21	dichlorofluoromethane		emissions to air	emissions to air, unspecified	08a91e70-3ddc-11dd-965c-0050c2490048	1.7395e+06	kg	EMEP	E-PRTR	Literature	Method A	NMVOC breakdown estimates	151															2.62665e+08	0	0	0	0	0	0	0	0	0	0	0	0	0	0	5.70958e-05	0	0	0	0	0	0
HCFC-22	HCFC-22		emissions to water	emissions to water, unspecified	fe0acd60-3ddc-11dd-a27d-0050c2490048	0	kg	Not applicable	Not applicable	Not applicable	Not applicable					7.26534e-09												0	0	0	0	0	0	0	0	0	0	0	0	0	0	0	0	0	0	0	0	0	0
HCFC-22	HCFC-22		emissions to soil	emissions to soil, unspecified	fe0acd60-3ddc-11dd-a27a-0050c2490048	0	kg	Not applicable	Not applicable	Not applicable	Not applicable					8.21514e-09												0	0	0	0	0	0	0	0	0	0	0	0	0	0	0	0	0	0	0	0	0	0
HCFC-22	chlorodifluoromethane		emissions to air	emissions to air, unspecified	fe0acd60-3ddc-11dd-a90d-0050c2490048	7.10297e+06	kg	EMEP	E-PRTR	Literature	Method A	NMVOC breakdown estimates	1810	0.05		9.18665e-09												1.28564e+10	355148	0	0.0652524	0	0	0	0	0	0	0	0	0	0	0	0.0027946	0.0327522	0	2.42667e-07	0	0	0
HCFC-225ca	Chlorodifluoromethane HCFC-22		emissions to air	emissions to air, unspecified	08a91e70-3ddc-11dd-985f-0050c2490048	0	kg	EMEP	E-PRTR	Edgar	Method B	Ozone-depleting substances	122	0.02														0	0	0	0	0	0	0	0	0	0	0	0	0	0	0	0	0	0	0	0	0	0
HCFC-225cb	1,3-dichloro-1,1,2,2,3-pentafluoropropane HCFC-225cb	missing	emissions to air	emissions to air, unspecified	fe0acd60-3ddc-11dd-ab24-0050c2490048	0	kg	Not applicable	Not applicable	Not applicable	missing		595	0.03														0	0	0	0	0	0	0	0	0	0	0	0	0	0	0	0	0	0	0	0	0	0
HCFC-31	HCFC-31		emissions to water	emissions to water, unspecified	4d9a8790-3ddd-11dd-933b-0050c2490048	0	kg	Not applicable	Not applicable	Not applicable	Not applicable				1.86949e-06													0	0	0	0	0	0	0	0	0	0	0	0	0	0	0	0	0	0	0	0	0	0
HCFC-31	HCFC-31		emissions to soil	emissions to soil, unspecified	fe0acd60-3ddc-11dd-a281-0050c2490048	0	kg	Not applicable	Not applicable	Not applicable	Not applicable				1.68661e-06													0	0	0	0	0	0	0	0	0	0	0	0	0	0	0	0	0	0	0	0	0	0
HCFC-31	chlorofluoromethane		emissions to air	emissions to air, unspecified	4d9a8790-3ddd-11dd-9335-0050c2490048	2.60925e+06	kg	EMEP	E-PRTR	Literature	Method A	NMVOC breakdown estimates			2.4269e-06													0	0	6.33239	0	0	0	0	0	0	0	0	0	0	0	0	0	0	0.000337226	0	0	0	0
heptachlor	Heptachlor	Industrial releases	emissions to soil	emissions to soil, unspecified	fe0acd60-3ddc-11dd-a659-0050c2490048	0	kg	E-PRTR	Not applicable	Not applicable	Method E				1.25667e-05	7.28261e-07									478.331			0	0	0	0	0	0	0	0	0	0	0	0	0	0	0	0	0	0	0	0	0	0
heptachlor	Heptachlor		emissions to air	emissions to air, unspecified	fe0acd60-3ddc-11dd-a65a-0050c2490048	0	kg	EMEP	E-PRTR	Not applicable	Method C	Toxic airborne emissions			4.15651e-05	2.40877e-06									62.0581			0	0	0	0	0	0	0	0	0	0	0	0	0	0	0	0	0	0	0	0	0	0
heptachlor	Heptachlor	Industrial releases	emissions to water	emissions to water, unspecified	fe0acd60-3ddc-11dd-a660-0050c2490048	82.5448	kg	E-PRTR	EUROSTAT - economic data	Not applicable	Method D1	Toxic waterborne emissions			0.00205217	0.000118927									134187			0	0	0.169396	0.00981678	0	0	0	0	0	0	0	0	1.10765e+07	0	0	0	0	9.02105e-06	3.65076e-08	0	0	0
heptane	heptane		emissions to water	emissions to water, unspecified	fe0acd60-3ddc-11dd-a669-0050c2490048	0	kg	Not applicable	Not applicable	Not applicable	Not applicable														5.40183			0	0	0	0	0	0	0	0	0	0	0	0	0	0	0	0	0	0	0	0	0	0
heptane	heptane		emissions to soil	emissions to soil, unspecified	fe0acd60-3ddc-11dd-a36f-0050c2490048	0	kg	Not applicable	Not applicable	Not applicable	Not applicable														0.00173367			0	0	0	0	0	0	0	0	0	0	0	0	0	0	0	0	0	0	0	0	0	0
heptane	n-heptane		emissions to air	emissions to air, unspecified	fe0acd60-3ddc-11dd-a663-0050c2490048	8.81718e+06	kg	EMEP	E-PRTR	Literature	Method A	NMVOC breakdown estimates							0.834						1.01362e-05			0	0	0	0	0	0	7.35353e+06	0	0	0	0	0	89.3724	0	0	0	0	0	0	0	0	0.000465211
heptane	heptane		emissions to air	emissions to air, unspecified	fe0acd60-3ddc-11dd-a663-0050c2490048	3.1683e+07	kg	EMEP	E-PRTR	Literature	Method A	NMVOC breakdown estimates							0.834						1.01362e-05			0	0	0	0	0	0	2.64236e+07	0	0	0	0	0	321.144	0	0	0	0	0	0	0	0	0.00167166
heptene	heptenes, unspecified		emissions to air	emissions to air, unspecified	e70caa4d-7e40-4222-bede-11ba2e7e043e	2.11626e+07	kg	EMEP	E-PRTR	Literature	Method A	NMVOC breakdown estimates													0.000536717			0	0	0	0	0	0	0	0	0	0	0	0	11358.3	0	0	0	0	0	0	0	0	0
heptenophos	Heptenophos	Pesticides (surface water)	Emissions to water	Emissions to water, unspecified	fe0acd60-3ddc-11dd-a67e-0050c2490048	578.864	kg	Literature	Eurostat - harvested areas	Not applicable	Method F	Pesticides													71366.7			0	0	0	0	0	0	0	0	0	0	0	0	4.13116e+07	0	0	0	0	0	0	0	0	0
heptenophos	Heptenophos	Pesticides (air)	Emissions to air	Emissions to air, unspecified	fe0acd60-3ddc-11dd-a678-0050c2490048	8682.96	kg	FAOstat - Pesticide usage data	Eurostat - harvested areas	Literature	Method F	Pesticides													714.545			0	0	0	0	0	0	0	0	0	0	0	0	6.20436e+06	0	0	0	0	0	0	0	0	0
heptenophos	Heptenophos	Pesticides (soil)	Emissions to soil	Emissions to soil, unspecified	fe0acd60-3ddc-11dd-a677-0050c2490048	11577.3	kg	FAOstat - Pesticide usage data	Eurostat - harvested areas	Literature	Method F	Pesticides													2021.57			0	0	0	0	0	0	0	0	0	0	0	0	2.34043e+07	0	0	0	0	0	0	0	0	0
hexachlorobenzene	Hexachlorobenzene		emissions to soil	emissions to soil, unspecified	08a91e70-3ddc-11dd-a2fa-0050c2490048	0	kg	E-PRTR	Not applicable	Not applicable	Method E				3.82178e-05	1.3083e-05									1255.08			0	0	0	0	0	0	0	0	0	0	0	0	0	0	0	0	0	0	0	0	0	0
hexachlorobenzene	Hexachlorobenzene (HCB)	Non-industrial releases	emissions to water	emissions to water, unspecified	fe0acd60-3ddc-11dd-a2ba-0050c2490048	79.1693	kg	Waterbase							3.82178e-05	1.3083e-05									1255.08			0	0	0.00302568	0.00103577	0	0	0	0	0	0	0	0	99364	0	0	0	0	1.6113e-07	3.85192e-09	0	0	0
hexachlorobenzene	Hexachlorobenzene (HCB)	Industrial releases	emissions to water	emissions to water, unspecified	fe0acd60-3ddc-11dd-a2ba-0050c2490048	286.392	kg	E-PRTR	EUROSTAT - economic data	Not applicable	Method D1	Toxic waterborne emissions			0.000814007	0.000278656									102591			0	0	0.233125	0.0798049	0	0	0	0	0	0	0	0	2.93813e+07	0	0	0	0	1.24149e-05	2.96786e-07	0	0	0
hexachlorobutadiene	Hexachlorobutadiene (HCBD)	Non-industrial releases	emissions to water	emissions to water, unspecified	4d9a8790-3ddd-11dd-9b13-0050c2490048	2616.81	kg	Waterbase							1.49696e-05										7764.67			0	0	0.0391727	0	0	0	0	0	0	0	0	0	2.03187e+07	0	0	0	0	2.08611e-06	0	0	0	0
hexamethylene diamine	hexamethylene diamine		emissions to water	emissions to water, unspecified	08a91e70-3ddc-11dd-9479-0050c2490048	0	kg	Not applicable	Not applicable	Not applicable	Not applicable														218.22			0	0	0	0	0	0	0	0	0	0	0	0	0	0	0	0	0	0	0	0	0	0
hexamethylene diamine	hexamethylene diamine		emissions to soil	emissions to soil, unspecified	041f5cf2-6556-11dd-ad8b-0800200c9a66	0	kg	Not applicable	Not applicable	Not applicable	Not applicable														9.28161			0	0	0	0	0	0	0	0	0	0	0	0	0	0	0	0	0	0	0	0	0	0
hexanal	hexanal		emissions to air	emissions to air, unspecified	fdaaa458-d02d-4777-8daa-97059be591a2	203463	kg	EMEP	E-PRTR	Literature	Method A	NMVOC breakdown estimates													0.21245			0	0	0	0	0	0	0	0	0	0	0	0	43225.5	0	0	0	0	0	0	0	0	0
hexane	hexane		emissions to water	emissions to water, unspecified	fe0acd60-3ddc-11dd-a696-0050c2490048	0	kg	Not applicable	Not applicable	Not applicable	Not applicable				1.93266e-09	2.62981e-07									64.7766			0	0	0	0	0	0	0	0	0	0	0	0	0	0	0	0	0	0	0	0	0	0
hexane	hexane		emissions to soil	emissions to soil, unspecified	08a91e70-3ddc-11dd-947c-0050c2490048	0	kg	Not applicable	Not applicable	Not applicable	Not applicable				1.86651e-10	2.5398e-08									0.0244198			0	0	0	0	0	0	0	0	0	0	0	0	0	0	0	0	0	0	0	0	0	0
hexane	n-hexane		emissions to air	emissions to air, unspecified	08a91e70-3ddc-11dd-947d-0050c2490048	1.50249e+08	kg	EMEP	E-PRTR	Literature	Method A	NMVOC breakdown estimates			9.92953e-10	1.35113e-07			0.814						0.000135016			0	0	0.14919	20.3006	0	0	1.22303e+08	0	0	0	0	0	20286	0	0	0	0	7.945e-06	7.54958e-05	0	0	0.00773731
hexane	hexane		emissions to air	emissions to air, unspecified	08a91e70-3ddc-11dd-947d-0050c2490048	1.84491e+08	kg	EMEP	E-PRTR	Literature	Method A	NMVOC breakdown estimates			9.92953e-10	1.35113e-07			0.814						0.000135016			0	0	0.18319	24.9271	0	0	1.50175e+08	0	0	0	0	0	24909.2	0	0	0	0	9.75566e-06	9.27013e-05	0	0	0.00950064
hexylcyclohexane	hexylcyclohexan		emissions to air	emissions to air, unspecified	08a91e70-3ddc-11dd-9495-0050c2490048	96207	kg	EMEP	E-PRTR	Literature	Method A	NMVOC breakdown estimates																0	0	0	0	0	0	0	0	0	0	0	0	0	0	0	0	0	0	0	0	0	0
hexythiazox	Hexythiazox	Pesticides (surface water)	Emissions to water	Emissions to water, unspecified	13998cf0-af38-4c63-afc0-22ff90942a09	19.152	kg	FAOstat - Pesticide usage data	Eurostat - harvested areas	Eurostat - organic farming areas	Method F	Pesticides				2.39739e-06									12089.9			0	0	0	4.59149e-05	0	0	0	0	0	0	0	0	231546	0	0	0	0	0	1.70753e-10	0	0	0
hexythiazox	Hexythiazox	Pesticides (air)	Emissions to air	Emissions to air, unspecified	69544045-c32a-4f2c-8379-132849153fe2	287.28	kg	FAOstat - Pesticide usage data	Eurostat - harvested areas	Literature	Method F	Pesticides				5.45939e-07									183.836			0	0	0	0.000156837	0	0	0	0	0	0	0	0	52812.5	0	0	0	0	0	5.83261e-10	0	0	0
hexythiazox	Hexythiazox	Pesticides (soil)	Emissions to soil	Emissions to soil, unspecified	8630f9dc-9229-4783-ad76-295e65c8c5c0	383.04	kg	FAOstat - Pesticide usage data	Eurostat - harvested areas	Eurostat - organic farming areas	Method F	Pesticides				1.27903e-08									63.6029			0	0	0	4.89921e-06	0	0	0	0	0	0	0	0	24362.5	0	0	0	0	0	1.82196e-11	0	0	0
HFC-134a	HFC-134a		emissions to water	emissions to water, unspecified	08a91e70-3ddc-11dd-9efc-0050c2490048	0	kg	Not applicable	Not applicable	Not applicable	Not applicable				1.11705e-08	4.07821e-09												0	0	0	0	0	0	0	0	0	0	0	0	0	0	0	0	0	0	0	0	0	0
HFC-134a	HFC-134a		emissions to soil	emissions to soil, unspecified	08a91e70-3ddc-11dd-9efa-0050c2490048	0	kg	Not applicable	Not applicable	Not applicable	Not applicable				1.13918e-08	4.15899e-09												0	0	0	0	0	0	0	0	0	0	0	0	0	0	0	0	0	0	0	0	0	0
HFCs	HFCs	average for HCFs as from UNFCCC	emissions to air	Emissions to air, UNFCC class average	002lorenzobenini	3.23925e+07	kg	UNFCCC GHG	Not applicable	Not applicable	Method S2		2530.77															8.19781e+10	0	0	0	0	0	0	0	0	0	0	0	0	0	0	0.0178197	0	0	0	0	0	0
hydrogen-3	Hydrogen-3	from medical sector	emissions to water	emissions to water, unspecified	08a91e70-3ddc-11dd-94b8-0050c2490048	0	kBq	Not applicable	Not applicable	Not applicable	method N							2.14e-05										0	0	0	0	0	0	0	0	0	0	0	0	0	0	0	0	0	0	0	0	0	0
hydrogen-3	Hydrogen-3	from Phosphate industry	emissions to water	emissions to water, unspecified	08a91e70-3ddc-11dd-94b8-0050c2490048	0	kBq	Not applicable	Not applicable	Not applicable	method N							2.14e-05										0	0	0	0	0	0	0	0	0	0	0	0	0	0	0	0	0	0	0	0	0	0
hydrogen-3	Hydrogen-3	from Primary steel manufacture	emissions to water	emissions to water, unspecified	08a91e70-3ddc-11dd-94b8-0050c2490048	0	kBq	Not applicable	Not applicable	Not applicable	method N							2.14e-05										0	0	0	0	0	0	0	0	0	0	0	0	0	0	0	0	0	0	0	0	0	0
hydrogen-3	Hydrogen-3	from Rare Earth production	emissions to water	emissions to water, unspecified	08a91e70-3ddc-11dd-94b8-0050c2490048	0	kBq	Not applicable	Not applicable	Not applicable	method N							2.14e-05										0	0	0	0	0	0	0	0	0	0	0	0	0	0	0	0	0	0	0	0	0	0
hydrogen-3	Hydrogen-3	from Titanium dioxide pigment manufacturers	emissions to water	emissions to water, unspecified	08a91e70-3ddc-11dd-94b8-0050c2490048	0	kBq	Not applicable	Not applicable	Not applicable	method N							2.14e-05										0	0	0	0	0	0	0	0	0	0	0	0	0	0	0	0	0	0	0	0	0	0
hydrogen-3	Hydrogen-3, Tritium	from gypsum end-of-life	emissions to air	emissions to air, unspecified	08a91e70-3ddc-11dd-94b2-0050c2490048	1.50768e+06	kBq	Eurostat - Prodcom	ecoinvent 3	Not applicable	Method O	Ionizing radiation emissions from gypsum plaster and ceramics end of life						0.000679										0	0	0	0	0	1023.72	0	0	0	0	0	0	0	0	0	0	0	0	0	0	1.8144e-09	0
hydrogen-3	Hydrogen-3, Tritium	from gypsum end-of-life	emissions to water	emissions to water, unspecified	08a91e70-3ddc-11dd-94b8-0050c2490048	3.50616e+07	kBq	Eurostat - Prodcom	Not applicable	Not applicable	Method O	Ionizing radiation emissions from gypsum plaster and ceramics end of life						2.14e-05										0	0	0	0	0	750.318	0	0	0	0	0	0	0	0	0	0	0	0	0	0	1.32984e-09	0
hydrogen-3	Hydrogen-3	from universities and research	emissions to water	emissions to water, unspecified	08a91e70-3ddc-11dd-94b8-0050c2490048	567155000	kBq	Not applicable	Not applicable	Not applicable	method N							2.14e-05										0	0	0	0	0	12137.1	0	0	0	0	0	0	0	0	0	0	0	0	0	0	2.15114e-08	0
hydrogen-3	Hydrogen-3	from the offshore oil and gas industry	emissions to water	emissions to water, unspecified	08a91e70-3ddc-11dd-94b8-0050c2490048	924627080	kBq	Eurostat - Energy	OSPAR	Not applicable	Method N	Extrapolation of ionizing radiation to water						2.14e-05										0	0	0	0	0	19787	0	0	0	0	0	0	0	0	0	0	0	0	0	0	3.50699e-08	0
hydrogen-3	Hydrogen-3	from radiochemical production	emissions to water	emissions to water, unspecified	08a91e70-3ddc-11dd-94b8-0050c2490048	7050000000	kBq	Not applicable	Not applicable	Not applicable	method N							2.14e-05										0	0	0	0	0	150870	0	0	0	0	0	0	0	0	0	0	0	0	0	0	2.67397e-07	0
hydrogen-3	Hydrogen-3, Tritium	from fuel reprocessing	emissions to air	emissions to air, unspecified	08a91e70-3ddc-11dd-94b2-0050c2490048	2.14955e+11	kBq	Fissilematerials.org	UNSCEAR	Not applicable	Method M2	JRC - spent fuel reprocessing						0.000679										0	0	0	0	0	1.45954e+08	0	0	0	0	0	0	0	0	0	0	0	0	0	0	0.000258685	0
hydrogen-3	Hydrogen-3, Tritium	from electricity production	emissions to air	emissions to air, unspecified	08a91e70-3ddc-11dd-94b2-0050c2490048	4.48614e+11	kBq	Eurostat - Energy	UNSCEAR	Not applicable	Method M1	Upscaling ionizing radiation from electricity production						0.000679										0	0	0	0	0	3.04609e+08	0	0	0	0	0	0	0	0	0	0	0	0	0	0	0.000539879	0
hydrogen-3	Hydrogen-3, Tritium	from electricity production	emissions to water	emissions to water, unspecified	08a91e70-3ddc-11dd-94b8-0050c2490048	3.75956e+12	kBq	Eurostat - Energy	UNSCEAR	Not applicable	Method M1	Upscaling ionizing radiation from electricity production						2.14e-05										0	0	0	0	0	8.04546e+07	0	0	0	0	0	0	0	0	0	0	0	0	0	0	0.000142595	0
hydrogen-3	Hydrogen-3	from fuel reprocessing	emissions to water	emissions to water, unspecified	08a91e70-3ddc-11dd-94b8-0050c2490048	1.03052e+13	kBq	Fissilematerials.org	UNSCEAR	Not applicable	Method M2	JRC - spent fuel reprocessing						2.14e-05										0	0	0	0	0	2.20532e+08	0	0	0	0	0	0	0	0	0	0	0	0	0	0	0.000390863	0
hymexazol	Hymexazol	Pesticides (surface water)	Emissions to water	Emissions to water, unspecified	4d9a8790-3ddd-11dd-92a8-0050c2490048	338.481	kg	Literature	Eurostat - harvested areas	Not applicable	Method F	Pesticides													403.349			0	0	0	0	0	0	0	0	0	0	0	0	136526	0	0	0	0	0	0	0	0	0
hymexazol	Hymexazol	Pesticides (air)	Emissions to air	Emissions to air, unspecified	4d9a8790-3ddd-11dd-92a2-0050c2490048	5077.21	kg	FAOstat - Pesticide usage data	Eurostat - harvested areas	Literature	Method F	Pesticides													5.13589			0	0	0	0	0	0	0	0	0	0	0	0	26076	0	0	0	0	0	0	0	0	0
hymexazol	Hymexazol	Pesticides (soil)	Emissions to soil	Emissions to soil, unspecified	4d9a8790-3ddd-11dd-92a1-0050c2490048	6769.61	kg	FAOstat - Pesticide usage data	Eurostat - harvested areas	Literature	Method F	Pesticides													17.0872			0	0	0	0	0	0	0	0	0	0	0	0	115674	0	0	0	0	0	0	0	0	0
ibuprofen	Ibuprofen		emissions to water	emissions to water, unspecified	1178baf5-ac16-4b52-8e0e-90a03001b254	0	kg	Not applicable	Not applicable	Not applicable	Not applicable														208.929			0	0	0	0	0	0	0	0	0	0	0	0	0	0	0	0	0	0	0	0	0	0
ibuprofen	Ibuprofen	Pharmaceuticals	emissions to water	emissions to water, unspecified	1178baf5-ac16-4b52-8e0e-90a03001b254	124891	kg	Literature	Not applicable	Not applicable	Method D3	Toxic waterborne emissions													208.929			0	0	0	0	0	0	0	0	0	0	0	0	2.60933e+07	0	0	0	0	0	0	0	0	0
imazalil	Imazalil	Pesticides (surface water)	Emissions to water	Emissions to water, unspecified	4d9a8790-3ddd-11dd-92df-0050c2490048	1480.68	kg	Literature	Eurostat - harvested areas	Not applicable	Method F	Pesticides				1.0343e-05									16283.4			0	0	0	0.0153146	0	0	0	0	0	0	0	0	2.41104e+07	0	0	0	0	0	5.69534e-08	0	0	0
imazalil	Imazalil	Pesticides (air)	Emissions to air	Emissions to air, unspecified	4d9a8790-3ddd-11dd-92ce-0050c2490048	22210.1	kg	FAOstat - Pesticide usage data	Eurostat - harvested areas	Literature	Method F	Pesticides				4.35849e-07									189.781			0	0	0	0.00968028	0	0	0	0	0	0	0	0	4.21505e+06	0	0	0	0	0	3.59999e-08	0	0	0
imazalil	Imazalil	Pesticides (soil)	Emissions to soil	Emissions to soil, unspecified	4d9a8790-3ddd-11dd-92cd-0050c2490048	29613.5	kg	FAOstat - Pesticide usage data	Eurostat - harvested areas	Literature	Method F	Pesticides				6.21429e-08									97.8178			0	0	0	0.00184027	0	0	0	0	0	0	0	0	2.89673e+06	0	0	0	0	0	6.84377e-09	0	0	0
imazaquin	Imazaquin	Pesticides (surface water)	Emissions to water	Emissions to water, unspecified	fe0acd60-3ddc-11dd-a60c-0050c2490048	30.65	kg	FAOstat - Pesticide usage data	Eurostat - harvested areas	Eurostat - organic farming areas	Method F	Pesticides																0	0	0	0	0	0	0	0	0	0	0	0	0	0	0	0	0	0	0	0	0	0
imazaquin	Imazaquin	Pesticides (air)	Emissions to air	Emissions to air, unspecified	fe0acd60-3ddc-11dd-a606-0050c2490048	459.75	kg	FAOstat - Pesticide usage data	Eurostat - harvested areas	Literature	Method F	Pesticides																0	0	0	0	0	0	0	0	0	0	0	0	0	0	0	0	0	0	0	0	0	0
imazaquin	Imazaquin	Pesticides (soil)	Emissions to soil	Emissions to soil, unspecified	fe0acd60-3ddc-11dd-a605-0050c2490048	613	kg	FAOstat - Pesticide usage data	Eurostat - harvested areas	Eurostat - organic farming areas	Method F	Pesticides																0	0	0	0	0	0	0	0	0	0	0	0	0	0	0	0	0	0	0	0	0	0
imidacloprid	imidacloprid		emissions to water	emissions to water, unspecified	88bec14e-7de1-424f-807b-8f961de993bd	0	kg	Not applicable	Not applicable	Not applicable	Not applicable					2.50498e-06									3139.18			0	0	0	0	0	0	0	0	0	0	0	0	0	0	0	0	0	0	0	0	0	0
imidacloprid	Imidacloprid	Pesticides (surface water)	Emissions to water	Emissions to water, unspecified	88bec14e-7de1-424f-807b-8f961de993bd	2224.85	kg	FAOstat - Pesticide usage data	Eurostat - harvested areas	Eurostat - organic farming areas	Method F	Pesticides				2.50498e-06									3139.18			0	0	0	0.00557319	0	0	0	0	0	0	0	0	6.9842e+06	0	0	0	0	0	2.07261e-08	0	0	0
imidacloprid	Imidacloprid	Pesticides (air)	Emissions to air	Emissions to air, unspecified	2b3c5dac-4f82-423b-9d8d-678c79d0a1a4	33372.7	kg	FAOstat - Pesticide usage data	Eurostat - harvested areas	Literature	Method F	Pesticides				1.20602e-06									122.027			0	0	0	0.0402482	0	0	0	0	0	0	0	0	4.07236e+06	0	0	0	0	0	1.49679e-07	0	0	0
imidacloprid	Imidacloprid	Pesticides (soil)	Emissions to soil	Emissions to soil, unspecified	fb4c0152-57a5-4f5e-82d6-8025e9b0f882	44497	kg	FAOstat - Pesticide usage data	Eurostat - harvested areas	Literature	Method F	Pesticides				7.71293e-08									96.6568			0	0	0	0.00343202	0	0	0	0	0	0	0	0	4.30093e+06	0	0	0	0	0	1.27633e-08	0	0	0
indan	indane		emissions to air	emissions to air, unspecified	08a91e70-3ddc-11dd-94d1-0050c2490048	8.41094e+06	kg	EMEP	E-PRTR	Literature	Method A	NMVOC breakdown estimates													1.05101			0	0	0	0	0	0	0	0	0	0	0	0	8.83995e+06	0	0	0	0	0	0	0	0	0
indeno(1,2,3-cd)pyrene	Indeno(1,2,3-cd)pyrene	Industrial releases	emissions to water	emissions to water, unspecified	fe0acd60-3ddc-11dd-ab91-0050c2490048	6.789	kg	E-PRTR	EUROSTAT - economic data	Not applicable	Method D																	0	0	0	0	0	0	0	0	0	0	0	0	0	0	0	0	0	0	0	0	0	0
indeno(1,2,3-cd)pyrene	Indeno(1,2,3-cd)pyrene	Non-industrial releases	emissions to water	emissions to water, unspecified	fe0acd60-3ddc-11dd-ab91-0050c2490048	444.522	kg	Waterbase	Eurostat - WWTP-connection stats	Not applicable	Method D2	Toxic waterborne emissions																0	0	0	0	0	0	0	0	0	0	0	0	0	0	0	0	0	0	0	0	0	0
Indeno(1,2,3-cd)pyrene	Indeno (1,2,3-cd) pyrene		emissions to air	emissions to air, unspecified	fe0acd60-3ddc-11dd-ab8b-0050c2490048	120666	kg	EMEP	E-PRTR	Not applicable	Method C	Toxic airborne emissions																0	0	0	0	0	0	0	0	0	0	0	0	0	0	0	0	0	0	0	0	0	0
indium	Indium	metal content - not mined in EU27	resource flows	Non-renewable element resources from ground	08a91e70-3ddc-11dd-94d5-0050c2490048	0	kg	British Geological Survey	Not applicable	Not applicable	Method K3																555	0	0	0	0	0	0	0	0	0	0	0	0	0	0	0	0	0	0	0	0	0	0
iodine-129	Iodine-129	from electricity production	emissions to air	emissions to air, unspecified	fe0acd60-3ddc-11dd-a7c3-0050c2490048	0	kBq	Eurostat - Energy	ecoinvent 3	UNSCEAR	Method M1	Upscaling ionizing radiation from electricity production						44.3										0	0	0	0	0	0	0	0	0	0	0	0	0	0	0	0	0	0	0	0	0	0
iodine-129	Iodine-129	from gypsum end-of-life	emissions to air	emissions to air, unspecified	fe0acd60-3ddc-11dd-a7c3-0050c2490048	64.3667	kBq	Eurostat - Prodcom	ecoinvent 3	Not applicable	Method O	Ionizing radiation emissions from gypsum plaster and ceramics end of life						44.3										0	0	0	0	0	2851.45	0	0	0	0	0	0	0	0	0	0	0	0	0	0	5.05381e-09	0
iodine-129	iodine-129	from fuel reprocessing	emissions to air	Emissions to air, unspecified	fe0acd60-3ddc-11dd-a7c3-0050c2490048	1.6687e+07	kBq	Fissilematerials.org	UNSCEAR	Not applicable	Method M2	JRC - spent fuel reprocessing						44.3										0	0	0	0	0	7.39236e+08	0	0	0	0	0	0	0	0	0	0	0	0	0	0	0.0013102	0
iodine-129	iodine-129	from fuel reprocessing	emissions to water	emissions to water, unspecified	fe0acd60-3ddc-11dd-a7ea-0050c2490048	1.54326e+09	kBq	Fissilematerials.org	UNSCEAR	Not applicable	Method M2	JRC - spent fuel reprocessing						4.71										0	0	0	0	0	7.26874e+09	0	0	0	0	0	0	0	0	0	0	0	0	0	0	0.0128829	0
iodine-131	Iodine-131	from Phosphate industry	emissions to water	emissions to water, unspecified	08a91e70-3ddc-11dd-9585-0050c2490048	0	kBq	Not applicable	Not applicable	Not applicable	method N							0.0236										0	0	0	0	0	0	0	0	0	0	0	0	0	0	0	0	0	0	0	0	0	0
iodine-131	Iodine-131	from Primary steel manufacture	emissions to water	emissions to water, unspecified	08a91e70-3ddc-11dd-9585-0050c2490048	0	kBq	Not applicable	Not applicable	Not applicable	method N							0.0236										0	0	0	0	0	0	0	0	0	0	0	0	0	0	0	0	0	0	0	0	0	0
iodine-131	Iodine-131	from radiochemical production	emissions to water	emissions to water, unspecified	08a91e70-3ddc-11dd-9585-0050c2490048	0	kBq	Not applicable	Not applicable	Not applicable	method N							0.0236										0	0	0	0	0	0	0	0	0	0	0	0	0	0	0	0	0	0	0	0	0	0
iodine-131	Iodine-131	from Rare Earth production	emissions to water	emissions to water, unspecified	08a91e70-3ddc-11dd-9585-0050c2490048	0	kBq	Not applicable	Not applicable	Not applicable	method N							0.0236										0	0	0	0	0	0	0	0	0	0	0	0	0	0	0	0	0	0	0	0	0	0
iodine-131	Iodine-131	from the offshore oil and gas industry	emissions to water	emissions to water, unspecified	08a91e70-3ddc-11dd-9585-0050c2490048	0	kBq	Not applicable	Not applicable	Not applicable	method N							0.0236										0	0	0	0	0	0	0	0	0	0	0	0	0	0	0	0	0	0	0	0	0	0
iodine-131	Iodine-131	from Titanium dioxide pigment manufacturers	emissions to water	emissions to water, unspecified	08a91e70-3ddc-11dd-9585-0050c2490048	0	kBq	Not applicable	Not applicable	Not applicable	method N							0.0236										0	0	0	0	0	0	0	0	0	0	0	0	0	0	0	0	0	0	0	0	0	0
iodine-131	Iodine-131	from universities and research	emissions to water	emissions to water, unspecified	08a91e70-3ddc-11dd-9585-0050c2490048	0	kBq	Not applicable	Not applicable	Not applicable	method N							0.0236										0	0	0	0	0	0	0	0	0	0	0	0	0	0	0	0	0	0	0	0	0	0
iodine-131	Iodine-131	from gypsum end-of-life	emissions to water	emissions to water, unspecified	08a91e70-3ddc-11dd-9585-0050c2490048	33.3445	kBq	Eurostat - Prodcom	Not applicable	Not applicable	Method O	Ionizing radiation emissions from gypsum plaster and ceramics end of life						0.0236										0	0	0	0	0	0.78693	0	0	0	0	0	0	0	0	0	0	0	0	0	0	1.39473e-12	0
iodine-131	Iodine-131	from gypsum end-of-life	emissions to air	emissions to air, unspecified	fe0acd60-3ddc-11dd-a7ec-0050c2490048	2893.87	kBq	Eurostat - Prodcom	ecoinvent 3	Not applicable	Method O	Ionizing radiation emissions from gypsum plaster and ceramics end of life						0.00714										0	0	0	0	0	20.6622	0	0	0	0	0	0	0	0	0	0	0	0	0	0	3.66211e-11	0
iodine-131	Iodine-131	from electricity production	emissions to water	emissions to water, unspecified	08a91e70-3ddc-11dd-9585-0050c2490048	3.15072e+06	kBq	Eurostat - Energy	ecoinvent 3	UNSCEAR	Method M1	Upscaling ionizing radiation from electricity production						0.0236										0	0	0	0	0	74356.9	0	0	0	0	0	0	0	0	0	0	0	0	0	0	1.31788e-07	0
iodine-131	Iodine-131	from electricity production	emissions to air	emissions to air, unspecified	fe0acd60-3ddc-11dd-a7ec-0050c2490048	8.00321e+06	kBq	Eurostat - Energy	UNSCEAR	Not applicable	Method M1	Upscaling ionizing radiation from electricity production						0.00714										0	0	0	0	0	57142.9	0	0	0	0	0	0	0	0	0	0	0	0	0	0	1.01278e-07	0
iodine-131	Iodine-131	from medical sector	emissions to water	emissions to water, unspecified	08a91e70-3ddc-11dd-9585-0050c2490048	24675000000	kBq	Not applicable	Not applicable	Not applicable	method N							0.0236										0	0	0	0	0	582330000	0	0	0	0	0	0	0	0	0	0	0	0	0	0	0.0010321	0
iodine-133	Iodine-133	from gypsum end-of-life	emissions to air	emissions to air, unspecified	08a91e70-3ddc-11dd-9587-0050c2490048	4.6987	kBq	Eurostat - Prodcom	ecoinvent 3	Not applicable	Method O	Ionizing radiation emissions from gypsum plaster and ceramics end of life						0.000443										0	0	0	0	0	0.00208152	0	0	0	0	0	0	0	0	0	0	0	0	0	0	3.68923e-15	0
iodine-133	Iodine-133	from gypsum end-of-life	emissions to water	emissions to water, unspecified	08a91e70-3ddc-11dd-958d-0050c2490048	5.45682	kBq	Eurostat - Prodcom	Not applicable	Not applicable	Method O	Ionizing radiation emissions from gypsum plaster and ceramics end of life																0	0	0	0	0	0	0	0	0	0	0	0	0	0	0	0	0	0	0	0	0	0
iodine-133	Iodine-133	from electricity production	emissions to water	emissions to water, unspecified	08a91e70-3ddc-11dd-958d-0050c2490048	286541	kBq	Eurostat - Energy	ecoinvent 3	UNSCEAR	Method M1	Upscaling ionizing radiation from electricity production																0	0	0	0	0	0	0	0	0	0	0	0	0	0	0	0	0	0	0	0	0	0
iodine-133	Iodine-133	from electricity production	emissions to air	emissions to air, unspecified	08a91e70-3ddc-11dd-9587-0050c2490048	446471	kBq	Eurostat - Energy	ecoinvent 3	UNSCEAR	Method M1	Upscaling ionizing radiation from electricity production						0.000443										0	0	0	0	0	197.786	0	0	0	0	0	0	0	0	0	0	0	0	0	0	3.5055e-10	0
ioxynil	Ioxynil	Pesticides (surface water)	Emissions to water	Emissions to water, unspecified	08a91e70-3ddc-11dd-9580-0050c2490048	1425.88	kg	Literature	Eurostat - harvested areas	Not applicable	Method F	Pesticides													19747.9			0	0	0	0	0	0	0	0	0	0	0	0	2.81581e+07	0	0	0	0	0	0	0	0	0
ioxynil	Ioxynil	Pesticides (air)	Emissions to air	Emissions to air, unspecified	08a91e70-3ddc-11dd-957a-0050c2490048	21388.1	kg	FAOstat - Pesticide usage data	Eurostat - harvested areas	Literature	Method F	Pesticides													1507.67			0	0	0	0	0	0	0	0	0	0	0	0	3.22462e+07	0	0	0	0	0	0	0	0	0
ioxynil	Ioxynil	Pesticides (soil)	Emissions to soil	Emissions to soil, unspecified	08a91e70-3ddc-11dd-958f-0050c2490048	105515	kg	FAOstat - Pesticide usage data	Eurostat - harvested areas	Literature	Method F	Pesticides													1044.86			0	0	0	0	0	0	0	0	0	0	0	0	1.10248e+08	0	0	0	0	0	0	0	0	0
iprodione	Iprodione	Pesticides (surface water)	Emissions to water	Emissions to water, unspecified	fe0acd60-3ddc-11dd-a7f8-0050c2490048	1372.5	kg	Literature	Eurostat - harvested areas	Not applicable	Method F	Pesticides				9.56733e-06									63148.6			0	0	0	0.0131312	0	0	0	0	0	0	0	0	8.66718e+07	0	0	0	0	0	4.88336e-08	0	0	0
iprodione	Iprodione	Pesticides (air)	Emissions to air	Emissions to air, unspecified	fe0acd60-3ddc-11dd-a7f2-0050c2490048	20587.6	kg	FAOstat - Pesticide usage data	Eurostat - harvested areas	Literature	Method F	Pesticides				1.79832e-06									5505.22			0	0	0	0.037023	0	0	0	0	0	0	0	0	1.13339e+08	0	0	0	0	0	1.37685e-07	0	0	0
iprodione	Iprodione	Pesticides (soil)	Emissions to soil	Emissions to soil, unspecified	08a91e70-3ddc-11dd-9584-0050c2490048	27450.1	kg	FAOstat - Pesticide usage data	Eurostat - harvested areas	Literature	Method F	Pesticides				2.45968e-06									16219.1			0	0	0	0.0675184	0	0	0	0	0	0	0	0	4.45215e+08	0	0	0	0	0	2.51094e-07	0	0	0
iron	Iron ores - metal content	metal content	resource flows	Non-renewable element resources from ground	08a91e70-3ddc-11dd-959a-0050c2490048	64160000	kg	Raw Materials Group	Not applicable	Not applicable	Method K3																1.66e-06	0	0	0	0	0	0	0	0	0	0	0	0	0	0	106.506	0	0	0	0	0	0	0
iron-59	Iron-59	from gypsum end-of-life	emissions to water	emissions to water, unspecified	08a91e70-3ddc-11dd-959d-0050c2490048	1.64213	kBq	Eurostat - Prodcom	Not applicable	Not applicable	Method O	Ionizing radiation emissions from gypsum plaster and ceramics end of life																0	0	0	0	0	0	0	0	0	0	0	0	0	0	0	0	0	0	0	0	0	0
iron-59	Iron-59	from electricity production	emissions to water	emissions to water, unspecified	08a91e70-3ddc-11dd-959d-0050c2490048	126512	kBq	Eurostat - Energy	ecoinvent 3	UNSCEAR	Method M1	Upscaling ionizing radiation from electricity production																0	0	0	0	0	0	0	0	0	0	0	0	0	0	0	0	0	0	0	0	0	0
isobutane	isobutane		emissions to air	emissions to air, unspecified	4d9a8790-3ddd-11dd-9355-0050c2490048	7.50172e+07	kg	EMEP	E-PRTR	Literature	Method A	NMVOC breakdown estimates							0.519									0	0	0	0	0	0	3.89339e+07	0	0	0	0	0	0	0	0	0	0	0	0	0	0	0.0024631
isobutanol	i-butanol		emissions to air	emissions to air, unspecified	08a91e70-3ddc-11dd-95a4-0050c2490048	0	kg	EMEP	E-PRTR	Not applicable	Method C	Toxic airborne emissions				1.19384e-08			0.608						0.200142			0	0	0	0	0	0	0	0	0	0	0	0	0	0	0	0	0	0	0	0	0	0
isobutyl acetate	i-butylacetate		emissions to air	emissions to air, unspecified	fe0acd60-3ddc-11dd-a43b-0050c2490048	1.36471e+07	kg	EMEP	E-PRTR	Literature	Method A	NMVOC breakdown estimates													0.0321697			0	0	0	0	0	0	0	0	0	0	0	0	439023	0	0	0	0	0	0	0	0	0
isofenphos	Isofenphos	Pesticides (surface water)	Emissions to water	Emissions to water, unspecified	fe0acd60-3ddc-11dd-a538-0050c2490048	578.864	kg	Literature	Eurostat - harvested areas	Not applicable	Method F	Pesticides				0.000158719									408279			0	0	0	0.0918764	0	0	0	0	0	0	0	0	2.36338e+08	0	0	0	0	0	3.41679e-07	0	0	0
isofenphos	Isofenphos	Pesticides (air)	Emissions to air	Emissions to air, unspecified	fe0acd60-3ddc-11dd-a532-0050c2490048	8682.96	kg	FAOstat - Pesticide usage data	Eurostat - harvested areas	Literature	Method F	Pesticides				8.78181e-06									3648.5			0	0	0	0.0762521	0	0	0	0	0	0	0	0	3.16798e+07	0	0	0	0	0	2.83574e-07	0	0	0
isofenphos	Isofenphos	Pesticides (soil)	Emissions to soil	Emissions to soil, unspecified	fe0acd60-3ddc-11dd-a531-0050c2490048	11577.3	kg	FAOstat - Pesticide usage data	Eurostat - harvested areas	Literature	Method F	Pesticides				4.87159e-06									12484.7			0	0	0	0.0563998	0	0	0	0	0	0	0	0	1.44538e+08	0	0	0	0	0	2.09745e-07	0	0	0
isopentane	2-methylbutane		emissions to air	emissions to air, unspecified	08a91e70-3ddc-11dd-95b1-0050c2490048	3.55824e+08	kg	EMEP	E-PRTR	Literature	Method A	NMVOC breakdown estimates							0.684									0	0	0	0	0	0	2.43383e+08	0	0	0	0	0	0	0	0	0	0	0	0	0	0	0.0153973
isophorone	isophorone		emissions to air	emissions to air, unspecified	fe0acd60-3ddc-11dd-a553-0050c2490048	6.10957e+06	kg	EMEP	E-PRTR	Literature	Method A	NMVOC breakdown estimates			9.34334e-09	6.00415e-09									0.264225			0	0	0.0570838	0.0366828	0	0	0	0	0	0	0	0	1.6143e+06	0	0	0	0	3.03995e-06	1.36419e-07	0	0	0
isoprene	isoprene		emissions to water	emissions to water, unspecified	e2faddbf-6555-11dd-ad8b-0800200c9a66	0	kg	Not applicable	Not applicable	Not applicable	Not applicable				6.83576e-08										20.2078			0	0	0	0	0	0	0	0	0	0	0	0	0	0	0	0	0	0	0	0	0	0
isoprene	isoprene		emissions to soil	emissions to soil, unspecified	e2faddbe-6555-11dd-ad8b-0800200c9a66	0	kg	Not applicable	Not applicable	Not applicable	Not applicable				1.71393e-09										0.102043			0	0	0	0	0	0	0	0	0	0	0	0	0	0	0	0	0	0	0	0	0	0
isoprene	isoprene		emissions to air	emissions to air, unspecified	08a91e70-3ddc-11dd-95b9-0050c2490048	1.17269e+06	kg	EMEP	E-PRTR	Literature	Method A	NMVOC breakdown estimates			6.81471e-08				1.84						5.69088e-05			0	0	0.0799155	0	0	0	2.15775e+06	0	0	0	0	0	66.7364	0	0	0	0	4.25584e-06	0	0	0	0.000136507
isopropalin	Isopropalin	Pesticides (surface water)	Emissions to water	Emissions to water, unspecified	fe0acd60-3ddc-11dd-adfc-0050c2490048	1815.73	kg	Literature	Eurostat - harvested areas	Not applicable	Method F	Pesticides				1.00446e-06									10989.2			0	0	0	0.00182382	0	0	0	0	0	0	0	0	1.99534e+07	0	0	0	0	0	6.7826e-09	0	0	0
isopropalin	Isopropalin	Pesticides (air)	Emissions to air	Emissions to air, unspecified	fe0acd60-3ddc-11dd-adf6-0050c2490048	27236	kg	FAOstat - Pesticide usage data	Eurostat - harvested areas	Literature	Method F	Pesticides				6.37477e-07									20.5769			0	0	0	0.0173623	0	0	0	0	0	0	0	0	560432	0	0	0	0	0	6.45686e-08	0	0	0
isopropalin	Isopropalin	Pesticides (soil)	Emissions to soil	Emissions to soil, unspecified	fe0acd60-3ddc-11dd-adf5-0050c2490048	133163	kg	FAOstat - Pesticide usage data	Eurostat - harvested areas	Literature	Method F	Pesticides				6.032e-08									34.0896			0	0	0	0.00803242	0	0	0	0	0	0	0	0	4.53949e+06	0	0	0	0	0	2.98717e-08	0	0	0
isopropanol	isopropanol		emissions to water	emissions to water, unspecified	fe0acd60-3ddc-11dd-a849-0050c2490048	0	kg	Not applicable	Not applicable	Not applicable	Not applicable														2.46342			0	0	0	0	0	0	0	0	0	0	0	0	0	0	0	0	0	0	0	0	0	0
isopropanol	isopropanol		emissions to soil	emissions to soil, unspecified	fe0acd60-3ddc-11dd-a842-0050c2490048	0	kg	Not applicable	Not applicable	Not applicable	Not applicable														0.563358			0	0	0	0	0	0	0	0	0	0	0	0	0	0	0	0	0	0	0	0	0	0
isopropanol	isopropanol		emissions to air	emissions to air, unspecified	fe0acd60-3ddc-11dd-a843-0050c2490048	4.11911e+08	kg	EMEP	E-PRTR	Literature	Method A	NMVOC breakdown estimates							0.318						0.0799594			0	0	0	0	0	0	1.30988e+08	0	0	0	0	0	3.29361e+07	0	0	0	0	0	0	0	0	0.00828675
isoproturon	Isoproturon	Non-industrial releases	emissions to water	emissions to water, unspecified	08a91e70-3ddc-11dd-95be-0050c2490048	199.096	kg	Waterbase	Eurostat - WWTP-connection stats	Not applicable	Method D2	Toxic waterborne emissions													116786			0	0	0	0	0	0	0	0	0	0	0	0	2.32517e+07	0	0	0	0	0	0	0	0	0
isoproturon	Isoproturon	Pesticides (surface water)	Emissions to water	Emissions to water, unspecified	08a91e70-3ddc-11dd-95be-0050c2490048	127644	kg	Literature	Eurostat - harvested areas	Not applicable	Method F	Pesticides													116786			0	0	0	0	0	0	0	0	0	0	0	0	1.4907e+10	0	0	0	0	0	0	0	0	0
isoproturon	Isoproturon	Industrial releases	emissions to water	emissions to water, unspecified	08a91e70-3ddc-11dd-95be-0050c2490048	433275	kg	E-PRTR	EUROSTAT - economic data	Not applicable	Method D1	Toxic waterborne emissions													116786			0	0	0	0	0	0	0	0	0	0	0	0	5.06006e+10	0	0	0	0	0	0	0	0	0
isoproturon	Isoproturon	Pesticides (air)	Emissions to air	Emissions to air, unspecified	fe0acd60-3ddc-11dd-a3d7-0050c2490048	1.91466e+06	kg	FAOstat - Pesticide usage data	Eurostat - harvested areas	Literature	Method F	Pesticides													6119.74			0	0	0	0	0	0	0	0	0	0	0	0	1.17172e+10	0	0	0	0	0	0	0	0	0
isoproturon	Isoproturon	Pesticides (soil)	Emissions to soil	Emissions to soil, unspecified	fe0acd60-3ddc-11dd-a3d6-0050c2490048	9.44265e+06	kg	FAOstat - Pesticide usage data	Eurostat - harvested areas	Literature	Method F	Pesticides													9461.35			0	0	0	0	0	0	0	0	0	0	0	0	8.93403e+10	0	0	0	0	0	0	0	0	0
isoxaben	Isoxaben	Pesticides (surface water)	Emissions to water	Emissions to water, unspecified	4d9a8790-3ddd-11dd-9d18-0050c2490048	807.086	kg	FAOstat - Pesticide usage data	Eurostat - harvested areas	Eurostat - organic farming areas	Method F	Pesticides				7.05152e-06									54679.6			0	0	0	0.00569118	0	0	0	0	0	0	0	0	4.41311e+07	0	0	0	0	0	2.11649e-08	0	0	0
isoxaben	Isoxaben	Pesticides (air)	Emissions to air	Emissions to air, unspecified	4d9a8790-3ddd-11dd-9d12-0050c2490048	12106.3	kg	FAOstat - Pesticide usage data	Eurostat - harvested areas	Literature	Method F	Pesticides				3.53264e-07									621.572			0	0	0	0.00427672	0	0	0	0	0	0	0	0	7.52493e+06	0	0	0	0	0	1.59047e-08	0	0	0
isoxaben	Isoxaben	Pesticides (soil)	Emissions to soil	Emissions to soil, unspecified	4d9a8790-3ddd-11dd-9d11-0050c2490048	59667.6	kg	FAOstat - Pesticide usage data	Eurostat - harvested areas	Eurostat - organic farming areas	Method F	Pesticides				1.52653e-07									1183.61			0	0	0	0.00910841	0	0	0	0	0	0	0	0	7.06233e+07	0	0	0	0	0	3.38732e-08	0	0	0
kaolin	Kaolin		resource flows	Non-renewable material resources from ground	fe0acd60-3ddc-11dd-aab8-0050c2490048	3.06526e+09	kg	Eurostat - prodcom	Not applicable	Not applicable	Method K3																	0	0	0	0	0	0	0	0	0	0	0	0	0	0	0	0	0	0	0	0	0	0
kaolinite	Kaolinitic clays (ball and plastic clays)		resource flows	Non-renewable material resources from ground	08a91e70-3ddc-11dd-95c1-0050c2490048	1910071952	kg	Eurostat - Prodcom	Not applicable	Not applicable	method K3																	0	0	0	0	0	0	0	0	0	0	0	0	0	0	0	0	0	0	0	0	0	0
kresoxim methyl	Kresoxim-Methyl	Pesticides (surface water)	Emissions to water	Emissions to water, unspecified	08a91e70-3ddc-11dd-95c6-0050c2490048	2736.44	kg	Literature	Eurostat - harvested areas	Not applicable	Method F	Pesticides				3.23733e-07									112263			0	0	0	0.000885876	0	0	0	0	0	0	0	0	3.07201e+08	0	0	0	0	0	3.29448e-09	0	0	0
kresoxim methyl	Kresoxim-Methyl	Pesticides (air)	Emissions to air	Emissions to air, unspecified	4d9a8790-3ddd-11dd-95d2-0050c2490048	41046.6	kg	FAOstat - Pesticide usage data	Eurostat - harvested areas	Literature	Method F	Pesticides				8.31702e-08									1551.49			0	0	0	0.00341386	0	0	0	0	0	0	0	0	6.36836e+07	0	0	0	0	0	1.26958e-08	0	0	0
kresoxim methyl	Kresoxim-Methyl	Pesticides (soil)	Emissions to soil	Emissions to soil, unspecified	08a91e70-3ddc-11dd-95c3-0050c2490048	54728.8	kg	FAOstat - Pesticide usage data	Eurostat - harvested areas	Literature	Method F	Pesticides				2.60269e-10									90.0956			0	0	0	1.42442e-05	0	0	0	0	0	0	0	0	4.93083e+06	0	0	0	0	0	5.29726e-11	0	0	0
krypton-85	Krypton-85	from gypsum end-of-life	emissions to air	emissions to air, unspecified	08a91e70-3ddc-11dd-95ca-0050c2490048	40353.9	kBq	Eurostat - Prodcom	ecoinvent 3	Not applicable	Method O	Ionizing radiation emissions from gypsum plaster and ceramics end of life						6.64e-06										0	0	0	0	0	0.26795	0	0	0	0	0	0	0	0	0	0	0	0	0	0	4.74906e-13	0
krypton-85	Krypton-85	from electricity production	emissions to air	emissions to air, unspecified	08a91e70-3ddc-11dd-95ca-0050c2490048	1.15785e+10	kBq	Eurostat - Energy	ecoinvent 3	UNSCEAR	Method M1	Upscaling ionizing radiation from electricity production						6.64e-06										0	0	0	0	0	76881.2	0	0	0	0	0	0	0	0	0	0	0	0	0	0	1.36262e-07	0
krypton-87	Krypton-87	from gypsum end-of-life	emissions to air	emissions to air, unspecified	08a91e70-3ddc-11dd-95ce-0050c2490048	10573.8	kBq	Eurostat - Prodcom	ecoinvent 3	Not applicable	Method O	Ionizing radiation emissions from gypsum plaster and ceramics end of life																0	0	0	0	0	0	0	0	0	0	0	0	0	0	0	0	0	0	0	0	0	0
krypton-87	Krypton-87	from electricity production	emissions to air	emissions to air, unspecified	08a91e70-3ddc-11dd-95ce-0050c2490048	5.66642e+08	kBq	Eurostat - Energy	ecoinvent 3	UNSCEAR	Method M1	Upscaling ionizing radiation from electricity production																0	0	0	0	0	0	0	0	0	0	0	0	0	0	0	0	0	0	0	0	0	0
krypton-88	Krypton-88	from gypsum end-of-life	emissions to air	emissions to air, unspecified	08a91e70-3ddc-11dd-9ddf-0050c2490048	13874.3	kBq	Eurostat - Prodcom	ecoinvent 3	Not applicable	Method O	Ionizing radiation emissions from gypsum plaster and ceramics end of life																0	0	0	0	0	0	0	0	0	0	0	0	0	0	0	0	0	0	0	0	0	0
krypton-88	Krypton-88	from electricity production	emissions to air	emissions to air, unspecified	08a91e70-3ddc-11dd-9ddf-0050c2490048	6.78924e+08	kBq	Eurostat - Energy	ecoinvent 3	UNSCEAR	Method M1	Upscaling ionizing radiation from electricity production																0	0	0	0	0	0	0	0	0	0	0	0	0	0	0	0	0	0	0	0	0	0
krypton-89	Krypton-89	from gypsum end-of-life	emissions to air	emissions to air, unspecified	08a91e70-3ddc-11dd-9de3-0050c2490048	5825.38	kBq	Eurostat - Prodcom	ecoinvent 3	Not applicable	Method O	Ionizing radiation emissions from gypsum plaster and ceramics end of life																0	0	0	0	0	0	0	0	0	0	0	0	0	0	0	0	0	0	0	0	0	0
krypton-89	Krypton-89	from electricity production	emissions to air	emissions to air, unspecified	08a91e70-3ddc-11dd-9de3-0050c2490048	2.53112e+08	kBq	Eurostat - Energy	ecoinvent 3	UNSCEAR	Method M1	Upscaling ionizing radiation from electricity production																0	0	0	0	0	0	0	0	0	0	0	0	0	0	0	0	0	0	0	0	0	0
lanthanum-140	Lanthanum-140	from gypsum end-of-life	emissions to air	emissions to air, unspecified	32cc1011-6556-11dd-ad8b-0800200c9a66	0.275443	kBq	Eurostat - Prodcom	ecoinvent 3	Not applicable	Method O	Ionizing radiation emissions from gypsum plaster and ceramics end of life																0	0	0	0	0	0	0	0	0	0	0	0	0	0	0	0	0	0	0	0	0	0
lanthanum-140	Lanthanum-140	from gypsum end-of-life	emissions to water	emissions to water, unspecified	fe0acd60-3ddc-11dd-a8e1-0050c2490048	9.16012	kBq	Eurostat - Prodcom	Not applicable	Not applicable	Method O	Ionizing radiation emissions from gypsum plaster and ceramics end of life																0	0	0	0	0	0	0	0	0	0	0	0	0	0	0	0	0	0	0	0	0	0
lanthanum-140	Lanthanum-140	from electricity production	emissions to air	emissions to air, unspecified	32cc1011-6556-11dd-ad8b-0800200c9a66	11594.5	kBq	Eurostat - Energy	ecoinvent 3	UNSCEAR	Method M1	Upscaling ionizing radiation from electricity production																0	0	0	0	0	0	0	0	0	0	0	0	0	0	0	0	0	0	0	0	0	0
lanthanum-140	Lanthanum-140	from electricity production	emissions to water	emissions to water, unspecified	fe0acd60-3ddc-11dd-a8e1-0050c2490048	453222	kBq	Eurostat - Energy	ecoinvent 3	UNSCEAR	Method M1	Upscaling ionizing radiation from electricity production																0	0	0	0	0	0	0	0	0	0	0	0	0	0	0	0	0	0	0	0	0	0
lasso	Alachlor	Industrial releases	emissions to water	emissions to water, unspecified	4d9a8790-3ddd-11dd-91a7-0050c2490048	179.297	kg	E-PRTR	EUROSTAT - economic data	Not applicable	Method D1	Toxic waterborne emissions													76362.1			0	0	0	0	0	0	0	0	0	0	0	0	1.36915e+07	0	0	0	0	0	0	0	0	0
lasso	Alachlor	Pesticides (surface water)	Emissions to water	Emissions to water, unspecified	4d9a8790-3ddd-11dd-91a7-0050c2490048	11781.9	kg	Literature	Eurostat - harvested areas	Not applicable	Method F	Pesticides													76362.1			0	0	0	0	0	0	0	0	0	0	0	0	8.99692e+08	0	0	0	0	0	0	0	0	0
lasso	Alachlor	Pesticides (air)	Emissions to air	Emissions to air, unspecified	4d9a8790-3ddd-11dd-98d6-0050c2490048	176729	kg	FAOstat - Pesticide usage data	Eurostat - harvested areas	Literature	Method F	Pesticides													2294.27			0	0	0	0	0	0	0	0	0	0	0	0	4.05463e+08	0	0	0	0	0	0	0	0	0
lasso	Alachlor	Pesticides (soil)	Emissions to soil	Emissions to soil, unspecified	4d9a8790-3ddd-11dd-98d5-0050c2490048	871862	kg	FAOstat - Pesticide usage data	Eurostat - harvested areas	Literature	Method F	Pesticides													9281.13			0	0	0	0	0	0	0	0	0	0	0	0	8.09186e+09	0	0	0	0	0	0	0	0	0
lead	lead II		emissions to water	emissions to water, unspecified	4d9a8790-3ddd-11dd-91e2-0050c2490048	0	kg	Not applicable	Not applicable	Not applicable	Not applicable				3.41625e-07	0.000119841									374.712			0	0	0	0	0	0	0	0	0	0	0	0	0	0	0	0	0	0	0	0	0	0
lead	Lead	Non-industrial releases	emissions to water	emissions to water, unspecified	4d9a8790-3ddd-11dd-91e2-0050c2490048	82513.1	kg	Waterbase	Eurostat - WWTP-connection stats	Not applicable	Method D2	Toxic waterborne emissions			3.41625e-07	0.000119841									374.712			0	0	0.0281885	9.88848	0	0	0	0	0	0	0	0	3.09187e+07	0	0	0	0	1.50116e-06	3.67742e-05	0	0	0
lead	Lead and compounds (as Pb)	Industrial releases	emissions to water	emissions to water, unspecified	4d9a8790-3ddd-11dd-91e2-0050c2490048	185429	kg	E-PRTR	EUROSTAT - economic data	Not applicable	Method D1	Toxic waterborne emissions			3.41625e-07	0.000119841									374.712			0	0	0.0633472	22.2221	0	0	0	0	0	0	0	0	6.94826e+07	0	0	0	0	3.37351e-06	8.26415e-05	0	0	0
lead	Lead and compounds (as Pb)	Industrial releases	emissions to soil	emissions to soil, unspecified	fe0acd60-3ddc-11dd-a97e-0050c2490048	19400	kg	E-PRTR	EUROSTAT - economic data	Not applicable	Method E				2.01939e-07	7.08399e-05									221.498			0	0	0.00391762	1.37429	0	0	0	0	0	0	0	0	4.29706e+06	0	0	0	0	2.0863e-07	5.11086e-06	0	0	0
lead	Lead	sludge	emissions to soil	emissions to soil, unspecified	fe0acd60-3ddc-11dd-a97e-0050c2490048	320778	kg	Eurostat - sewage sludge usage	Literature	Not applicable	Method E				2.01939e-07	7.08399e-05									221.498			0	0	0.0647778	22.7239	0	0	0	0	0	0	0	0	7.10517e+07	0	0	0	0	3.44969e-06	8.45079e-05	0	0	0
lead	Lead	manure	emissions to soil	emissions to soil, unspecified	fe0acd60-3ddc-11dd-a97e-0050c2490048	1.88533e+06	kg	FAOstat - manure application	Literature	Not applicable	Method E				2.01939e-07	7.08399e-05									221.498			0	0	0.380723	133.557	0	0	0	0	0	0	0	0	4.17597e+08	0	0	0	0	2.02751e-05	0.000496684	0	0	0
Lead	Pb		emissions to air	emissions to air, unspecified	4d9a8790-3ddd-11dd-91dc-0050c2490048	2.21199e+06	kg	EMEP	E-PRTR	Not applicable	Method C	Toxic airborne emissions			2.69221e-05	0.00944422									174.863			0	0	59.5516	20890.6	0	0	0	0	0	0	0	0	3.86796e+08	0	0	0	0	0.00317137	0.0776898	0	0	0
lead	Lead ores - metal content	metal content	resource flows	Non-renewable element resources from ground	fe0acd60-3ddc-11dd-ae5d-0050c2490048	179453000	kg	British Geological Survey	Not applicable	Not applicable	Method K3																0.015	0	0	0	0	0	0	0	0	0	0	0	0	0	0	2691795	0	0	0	0	0	0	0
lead-210	Lead-210	from medical sector	emissions to water	emissions to water, unspecified	4d9a8790-3ddd-11dd-9812-0050c2490048	0	kBq	Not applicable	Not applicable	Not applicable	method N																	0	0	0	0	0	0	0	0	0	0	0	0	0	0	0	0	0	0	0	0	0	0
lead-210	Lead-210	from radiochemical production	emissions to water	emissions to water, unspecified	4d9a8790-3ddd-11dd-9812-0050c2490048	0	kBq	Not applicable	Not applicable	Not applicable	method N																	0	0	0	0	0	0	0	0	0	0	0	0	0	0	0	0	0	0	0	0	0	0
lead-210	Lead-210	from Rare Earth production	emissions to water	emissions to water, unspecified	4d9a8790-3ddd-11dd-9812-0050c2490048	0	kBq	Not applicable	Not applicable	Not applicable	method N																	0	0	0	0	0	0	0	0	0	0	0	0	0	0	0	0	0	0	0	0	0	0
lead-210	Lead-210	from universities and research	emissions to water	emissions to water, unspecified	4d9a8790-3ddd-11dd-9812-0050c2490048	0	kBq	Not applicable	Not applicable	Not applicable	method N																	0	0	0	0	0	0	0	0	0	0	0	0	0	0	0	0	0	0	0	0	0	0
lead-210	Lead-210	from electricity production	emissions to water	emissions to water, unspecified	4d9a8790-3ddd-11dd-9812-0050c2490048	0	kBq	Eurostat - Energy	ecoinvent 3	UNSCEAR	Method M1	Upscaling ionizing radiation from electricity production																0	0	0	0	0	0	0	0	0	0	0	0	0	0	0	0	0	0	0	0	0	0
lead-210	Lead-210	from gypsum end-of-life	emissions to water	emissions to water, unspecified	4d9a8790-3ddd-11dd-9812-0050c2490048	1270.39	kBq	Eurostat - Prodcom	Not applicable	Not applicable	Method O	Ionizing radiation emissions from gypsum plaster and ceramics end of life																0	0	0	0	0	0	0	0	0	0	0	0	0	0	0	0	0	0	0	0	0	0
lead-210	Lead-210	from gypsum end-of-life	emissions to air	emissions to air, unspecified	4d9a8790-3ddd-11dd-91e5-0050c2490048	11043	kBq	Eurostat - Prodcom	ecoinvent 3	Not applicable	Method O	Ionizing radiation emissions from gypsum plaster and ceramics end of life						0.0714										0	0	0	0	0	788.471	0	0	0	0	0	0	0	0	0	0	0	0	0	0	1.39746e-09	0
lead-210	Lead-210	from Primary steel manufacture	emissions to water	emissions to water, unspecified	4d9a8790-3ddd-11dd-9812-0050c2490048	185000	kBq	Not applicable	Not applicable	Not applicable	method N																	0	0	0	0	0	0	0	0	0	0	0	0	0	0	0	0	0	0	0	0	0	0
lead-210	Lead-210	from Phosphate industry	emissions to water	emissions to water, unspecified	4d9a8790-3ddd-11dd-9812-0050c2490048	530000	kBq	Not applicable	Not applicable	Not applicable	method N																	0	0	0	0	0	0	0	0	0	0	0	0	0	0	0	0	0	0	0	0	0	0
lead-210	Lead-210	from Titanium dioxide pigment manufacturers	emissions to water	emissions to water, unspecified	4d9a8790-3ddd-11dd-9812-0050c2490048	3630000	kBq	Not applicable	Not applicable	Not applicable	method N																	0	0	0	0	0	0	0	0	0	0	0	0	0	0	0	0	0	0	0	0	0	0
lead-210	Lead-210	from the offshore oil and gas industry	emissions to water	emissions to water, unspecified	4d9a8790-3ddd-11dd-9812-0050c2490048	7.32478e+07	kBq	Eurostat - Energy	OSPAR	Not applicable	Method N	Extrapolation of ionizing radiation to water																0	0	0	0	0	0	0	0	0	0	0	0	0	0	0	0	0	0	0	0	0	0
lead-210	Lead-210	from electricity production	emissions to air	emissions to air, unspecified	4d9a8790-3ddd-11dd-91e5-0050c2490048	7.91974e+07	kBq	Eurostat - Energy	ecoinvent 3	UNSCEAR	Method M1	Upscaling ionizing radiation from electricity production						0.0714										0	0	0	0	0	5.65469e+06	0	0	0	0	0	0	0	0	0	0	0	0	0	0	1.00222e-05	0
lenacil	Lenacil	Pesticides (surface water)	Emissions to water	Emissions to water, unspecified	ccadd8db-ea0b-47ad-be06-dddc9ba58111	638.563	kg	FAOstat - Pesticide usage data	Eurostat - harvested areas	Eurostat - organic farming areas	Method F	Pesticides													59962.4			0	0	0	0	0	0	0	0	0	0	0	0	3.82897e+07	0	0	0	0	0	0	0	0	0
lenacil	Lenacil	Pesticides (air)	Emissions to air	Emissions to air, unspecified	5128238f-2718-4ba5-a1d1-bef405203c05	9578.44	kg	FAOstat - Pesticide usage data	Eurostat - harvested areas	Literature	Method F	Pesticides													1830.61			0	0	0	0	0	0	0	0	0	0	0	0	1.75344e+07	0	0	0	0	0	0	0	0	0
lenacil	Lenacil	Pesticides (soil)	Emissions to soil	Emissions to soil, unspecified	cff71e4b-8e3c-43c2-aee4-161c07b7eaaa	39679.1	kg	FAOstat - Pesticide usage data	Eurostat - harvested areas	Eurostat - organic farming areas	Method F	Pesticides													6449.38			0	0	0	0	0	0	0	0	0	0	0	0	2.55905e+08	0	0	0	0	0	0	0	0	0
lindane	Lindane		emissions to water	emissions to water, unspecified	4d9a8790-3ddd-11dd-981c-0050c2490048	0	kg	Not applicable	Not applicable	Not applicable	Not applicable				3.34625e-05	0.000387648									290330			0	0	0	0	0	0	0	0	0	0	0	0	0	0	0	0	0	0	0	0	0	0
lindane	Lindane	Pesticides (surface water)	Emissions to water	Emissions to water, unspecified	4d9a8790-3ddd-11dd-981c-0050c2490048	146.876	kg	Literature	Eurostat - harvested areas	Not applicable	Method F	Pesticides			3.34625e-05	0.000387648									290330			0	0	0.00491484	0.0569361	0	0	0	0	0	0	0	0	4.26425e+07	0	0	0	0	2.61736e-07	2.11739e-07	0	0	0
lindane	Lindane	Industrial releases	emissions to water	emissions to water, unspecified	4d9a8790-3ddd-11dd-981c-0050c2490048	649.384	kg	E-PRTR	EUROSTAT - economic data	Not applicable	Method D1	Toxic waterborne emissions			3.34625e-05	0.000387648									290330			0	0	0.02173	0.251732	0	0	0	0	0	0	0	0	1.88536e+08	0	0	0	0	1.15722e-06	9.36166e-07	0	0	0
lindane	Lindane	Pesticides (air)	Emissions to air	Emissions to air, unspecified	4d9a8790-3ddd-11dd-9816-0050c2490048	2203.14	kg	FAOstat - Pesticide usage data	Eurostat - harvested areas	Literature	Method F	Pesticides			1.4113e-05	0.000163493									18645.5			0	0	0.031093	0.360198	0	0	0	0	0	0	0	0	4.10786e+07	0	0	0	0	1.65583e-06	1.33954e-06	0	0	0
lindane	Lindane	Pesticides (soil)	Emissions to soil	Emissions to soil, unspecified	4d9a8790-3ddd-11dd-9815-0050c2490048	2937.52	kg	FAOstat - Pesticide usage data	Eurostat - harvested areas	Literature	Method F	Pesticides			4.45844e-06	5.1649e-05									20981.6			0	0	0.0130967	0.15172	0	0	0	0	0	0	0	0	6.16339e+07	0	0	0	0	6.97457e-07	5.6423e-07	0	0	0
linuron	Linuron	Pesticides (surface water)	Emissions to water	Emissions to water, unspecified	fe0acd60-3ddc-11dd-a6cc-0050c2490048	1283.43	kg	Literature	Eurostat - harvested areas	Not applicable	Method F	Pesticides				3.74428e-05									199180			0	0	0	0.0480554	0	0	0	0	0	0	0	0	2.55634e+08	0	0	0	0	0	1.78713e-07	0	0	0
linuron	Linuron	Pesticides (air)	Emissions to air	Emissions to air, unspecified	fe0acd60-3ddc-11dd-a6c6-0050c2490048	19251.5	kg	FAOstat - Pesticide usage data	Eurostat - harvested areas	Literature	Method F	Pesticides				1.68595e-05									8879.33			0	0	0	0.324571	0	0	0	0	0	0	0	0	1.70941e+08	0	0	0	0	0	1.20705e-06	0	0	0
linuron	Linuron	Pesticides (soil)	Emissions to soil	Emissions to soil, unspecified	fe0acd60-3ddc-11dd-a6c5-0050c2490048	91989.6	kg	FAOstat - Pesticide usage data	Eurostat - harvested areas	Literature	Method F	Pesticides				2.10788e-06									11123.3			0	0	0	0.193903	0	0	0	0	0	0	0	0	1.02323e+09	0	0	0	0	0	7.21106e-07	0	0	0
lithium	Lithium ores - metal content	metal content	resource flows	Non-renewable element resources from ground	fe0acd60-3ddc-11dd-aa34-0050c2490048	483000	kg	British Geological Survey	Not applicable	Not applicable	Method K3																0.0133	0	0	0	0	0	0	0	0	0	0	0	0	0	0	6423.9	0	0	0	0	0	0	0
londax	Bensulfuron-methyl	Pesticides (surface water)	Emissions to water	Emissions to water, unspecified	08a91e70-3ddc-11dd-a1e1-0050c2490048	6.86147	kg	FAOstat - Pesticide usage data	Eurostat - harvested areas	Eurostat - organic farming areas	Method F	Pesticides				2.06542e-06									451.241			0	0	0	1.41718e-05	0	0	0	0	0	0	0	0	3096.18	0	0	0	0	0	5.27035e-11	0	0	0
londax	Bensulfuron-methyl	Pesticides (air)	Emissions to air	Emissions to air, unspecified	4d9a8790-3ddd-11dd-91ac-0050c2490048	102.922	kg	FAOstat - Pesticide usage data	Eurostat - harvested areas	Literature	Method F	Pesticides				1.65434e-06									35.1463			0	0	0	0.000170269	0	0	0	0	0	0	0	0	3617.33	0	0	0	0	0	6.33211e-10	0	0	0
londax	Bensulfuron-methyl	Pesticides (soil)	Emissions to soil	Emissions to soil, unspecified	4d9a8790-3ddd-11dd-91ab-0050c2490048	507.749	kg	FAOstat - Pesticide usage data	Eurostat - harvested areas	Eurostat - organic farming areas	Method F	Pesticides				1.40787e-07									30.7584			0	0	0	7.14847e-05	0	0	0	0	0	0	0	0	15617.5	0	0	0	0	0	2.65844e-10	0	0	0
magnesite	Magnesite; natural magnesium carbonate		resource flows	Non-renewable material resources from ground	fe0acd60-3ddc-11dd-aabe-0050c2490048	4.11096e+08	kg	Eurostat - prodcom	Not applicable	Not applicable	Method K3																	0	0	0	0	0	0	0	0	0	0	0	0	0	0	0	0	0	0	0	0	0	0
magnesium	Magnesium ores - metal content	metal content - not mined in EU27	resource flows	Non-renewable element resources from ground	fe0acd60-3ddc-11dd-aac3-0050c2490048	0	kg	British Geological Survey	Not applicable	Not applicable	Method K3																2.48e-06	0	0	0	0	0	0	0	0	0	0	0	0	0	0	0	0	0	0	0	0	0	0
malathion	Malathion	Pesticides (surface water)	Emissions to water	Emissions to water, unspecified	08a91e70-3ddc-11dd-95db-0050c2490048	578.864	kg	Literature	Eurostat - harvested areas	Not applicable	Method F	Pesticides				2.20108e-07									62238.4			0	0	0	0.000127413	0	0	0	0	0	0	0	0	3.60276e+07	0	0	0	0	0	4.73834e-10	0	0	0
malathion	Malathion	Pesticides (air)	Emissions to air	Emissions to air, unspecified	fe0acd60-3ddc-11dd-a867-0050c2490048	8682.96	kg	FAOstat - Pesticide usage data	Eurostat - harvested areas	Literature	Method F	Pesticides				5.71648e-08									888.736			0	0	0	0.000496359	0	0	0	0	0	0	0	0	7.71686e+06	0	0	0	0	0	1.84591e-09	0	0	0
malathion	Malathion	Pesticides (soil)	Emissions to soil	Emissions to soil, unspecified	fe0acd60-3ddc-11dd-a866-0050c2490048	11577.3	kg	FAOstat - Pesticide usage data	Eurostat - harvested areas	Literature	Method F	Pesticides				6.96533e-09									1966.82			0	0	0	8.06396e-05	0	0	0	0	0	0	0	0	2.27704e+07	0	0	0	0	0	2.9989e-10	0	0	0
maleic hydrazide acid	maleic hydrazide acid		emissions to water	emissions to water, unspecified	08a91e70-3ddc-11dd-95e8-0050c2490048	0	kg	Not applicable	Not applicable	Not applicable	Not applicable					7.14931e-08									182.35			0	0	0	0	0	0	0	0	0	0	0	0	0	0	0	0	0	0	0	0	0	0
maleic hydrazide acid	Maleic hydrazide	Pesticides (surface water)	Emissions to water	Emissions to water, unspecified	08a91e70-3ddc-11dd-95e8-0050c2490048	30.65	kg	FAOstat - Pesticide usage data	Eurostat - harvested areas	Eurostat - organic farming areas	Method F	Pesticides				7.14931e-08									182.35			0	0	0	2.19126e-06	0	0	0	0	0	0	0	0	5589.03	0	0	0	0	0	8.14908e-12	0	0	0
maleic hydrazide acid	Maleic hydrazide	Pesticides (air)	Emissions to air	Emissions to air, unspecified	08a91e70-3ddc-11dd-96f6-0050c2490048	459.75	kg	FAOstat - Pesticide usage data	Eurostat - harvested areas	Literature	Method F	Pesticides				5.29614e-08									22.1063			0	0	0	2.4349e-05	0	0	0	0	0	0	0	0	10163.4	0	0	0	0	0	9.05513e-11	0	0	0
maleic hydrazide acid	Maleic hydrazide	Pesticides (soil)	Emissions to soil	Emissions to soil, unspecified	08a91e70-3ddc-11dd-95e5-0050c2490048	613	kg	FAOstat - Pesticide usage data	Eurostat - harvested areas	Eurostat - organic farming areas	Method F	Pesticides				2.15551e-08									54.9782			0	0	0	1.32133e-05	0	0	0	0	0	0	0	0	33701.7	0	0	0	0	0	4.91388e-11	0	0	0
mancozeb	Mancozeb		emissions to water	emissions to water, unspecified	08a91e70-3ddc-11dd-95ef-0050c2490048	0	kg	Not applicable	Not applicable	Not applicable	Not applicable					2.18351e-06									52198.6			0	0	0	0	0	0	0	0	0	0	0	0	0	0	0	0	0	0	0	0	0	0
mancozeb	Mancozeb	Pesticides (surface water)	Emissions to water	Emissions to water, unspecified	08a91e70-3ddc-11dd-95ef-0050c2490048	130356	kg	Literature	Eurostat - harvested areas	Not applicable	Method F	Pesticides				2.18351e-06									52198.6			0	0	0	0.284633	0	0	0	0	0	0	0	0	6.80438e+09	0	0	0	0	0	1.05852e-06	0	0	0
mancozeb	Mancozeb	Pesticides (air)	Emissions to air	Emissions to air, unspecified	fe0acd60-3ddc-11dd-9f59-0050c2490048	1.95533e+06	kg	FAOstat - Pesticide usage data	Eurostat - harvested areas	Literature	Method F	Pesticides				2.90867e-07									643.933			0	0	0	0.568743	0	0	0	0	0	0	0	0	1.2591e+09	0	0	0	0	0	2.11509e-06	0	0	0
mancozeb	Mancozeb	Pesticides (soil)	Emissions to soil	Emissions to soil, unspecified	08a91e70-3ddc-11dd-95ec-0050c2490048	2.60711e+06	kg	FAOstat - Pesticide usage data	Eurostat - harvested areas	Literature	Method F	Pesticides				7.31469e-08									1748.64			0	0	0	0.190702	0	0	0	0	0	0	0	0	4.55889e+09	0	0	0	0	0	7.09201e-07	0	0	0
maneb	Maneb	Pesticides (surface water)	Emissions to water	Emissions to water, unspecified	fe0acd60-3ddc-11dd-a468-0050c2490048	2239.45	kg	Literature	Eurostat - harvested areas	Not applicable	Method F	Pesticides			6.0219e-07	2.09617e-06									68352.3			0	0	0.00134857	0.00469426	0	0	0	0	0	0	0	0	1.53071e+08	0	0	0	0	7.18171e-08	1.74574e-08	0	0	0
maneb	Maneb	Pesticides (air)	Emissions to air	Emissions to air, unspecified	fe0acd60-3ddc-11dd-a462-0050c2490048	33591.7	kg	FAOstat - Pesticide usage data	Eurostat - harvested areas	Literature	Method F	Pesticides			8.02183e-08	2.79233e-07									843.208			0	0	0.00269467	0.00937989	0	0	0	0	0	0	0	0	2.83248e+07	0	0	0	0	1.43502e-07	3.48828e-08	0	0	0
maneb	Maneb	Pesticides (soil)	Emissions to soil	Emissions to soil, unspecified	fe0acd60-3ddc-11dd-a461-0050c2490048	44788.9	kg	FAOstat - Pesticide usage data	Eurostat - harvested areas	Literature	Method F	Pesticides			2.01732e-08	7.0221e-08									2289.78			0	0	0.000903535	0.00314512	0	0	0	0	0	0	0	0	1.02557e+08	0	0	0	0	4.8117e-08	1.16964e-08	0	0	0
manganese	Manganese ores - metal content	metal content - mined in EU27 aaccording to ( EC, 2014)	resource flows	Non-renewable element resources from ground	fe0acd60-3ddc-11dd-9e5c-0050c2490048	50000000	kg	EC(2014) CRM report	Not applicable	Not applicable																	2.35e-05	0	0	0	0	0	0	0	0	0	0	0	0	0	0	1175	0	0	0	0	0	0	0
Manganese	Mn		emissions to air	emissions to air, unspecified	08a91e70-3ddc-11dd-9bc7-0050c2490048	0	kg	Not applicable	Not applicable	Not applicable	Not applicable																	0	0	0	0	0	0	0	0	0	0	0	0	0	0	0	0	0	0	0	0	0	0
manganese-54	Manganese-54	from gypsum end-of-life	emissions to air	emissions to air, unspecified	fe0acd60-3ddc-11dd-9e5d-0050c2490048	0.0256387	kBq	Eurostat - Prodcom	ecoinvent 3	Not applicable	Method O	Ionizing radiation emissions from gypsum plaster and ceramics end of life																0	0	0	0	0	0	0	0	0	0	0	0	0	0	0	0	0	0	0	0	0	0
manganese-54	Manganese-54	from gypsum end-of-life	emissions to water	emissions to water, unspecified	fe0acd60-3ddc-11dd-9e63-0050c2490048	168.657	kBq	Eurostat - Prodcom	Not applicable	Not applicable	Method O	Ionizing radiation emissions from gypsum plaster and ceramics end of life						0.015										0	0	0	0	0	2.52985	0	0	0	0	0	0	0	0	0	0	0	0	0	0	4.48382e-12	0
manganese-54	Manganese-54	from electricity production	emissions to air	emissions to air, unspecified	fe0acd60-3ddc-11dd-9e5d-0050c2490048	1079.23	kBq	Eurostat - Energy	ecoinvent 3	UNSCEAR	Method M1	Upscaling ionizing radiation from electricity production																0	0	0	0	0	0	0	0	0	0	0	0	0	0	0	0	0	0	0	0	0	0
manganese-54	Manganese-54	from electricity production	emissions to water	emissions to water, unspecified	fe0acd60-3ddc-11dd-9e63-0050c2490048	9.94787e+06	kBq	Eurostat - Energy	ecoinvent 3	UNSCEAR	Method M1	Upscaling ionizing radiation from electricity production						0.015										0	0	0	0	0	149218	0	0	0	0	0	0	0	0	0	0	0	0	0	0	2.64469e-07	0
MCPA	MCPA		emissions to water	emissions to water, unspecified	0f6b1430-6a6b-4e64-a395-a7e8d79bd316	0	kg	Not applicable	Not applicable	Not applicable	Not applicable														93.2671			0	0	0	0	0	0	0	0	0	0	0	0	0	0	0	0	0	0	0	0	0	0
MCPA	MCPA	Pesticides (surface water)	Emissions to water	Emissions to water, unspecified	0f6b1430-6a6b-4e64-a395-a7e8d79bd316	50399.3	kg	Literature	Eurostat - harvested areas	Not applicable	Method F	Pesticides													93.2671			0	0	0	0	0	0	0	0	0	0	0	0	4.7006e+06	0	0	0	0	0	0	0	0	0
MCPA	MCPA	Pesticides (air)	Emissions to air	Emissions to air, unspecified	0cb04da1-f8b1-40fe-9a99-cab73b09cd5f	755990	kg	FAOstat - Pesticide usage data	Eurostat - harvested areas	Literature	Method F	Pesticides													12.7621			0	0	0	0	0	0	0	0	0	0	0	0	9.64803e+06	0	0	0	0	0	0	0	0	0
MCPA	MCPA	Pesticides (soil)	Emissions to soil	Emissions to soil, unspecified	31f9fd5a-db73-48b1-b176-bcaaca67eab8	3.71882e+06	kg	FAOstat - Pesticide usage data	Eurostat - harvested areas	Literature	Method F	Pesticides													13.9738			0	0	0	0	0	0	0	0	0	0	0	0	5.1966e+07	0	0	0	0	0	0	0	0	0
MCPB	MCPB	Pesticides (surface water)	Emissions to water	Emissions to water, unspecified	4d9a8790-3ddd-11dd-8d7d-0050c2490048	3982.51	kg	Literature	Eurostat - harvested areas	Not applicable	Method F	Pesticides				6.32953e-07									1953.43			0	0	0	0.00252074	0	0	0	0	0	0	0	0	7.77957e+06	0	0	0	0	0	9.37438e-09	0	0	0
MCPB	MCPB	Pesticides (air)	Emissions to air	Emissions to air, unspecified	4d9a8790-3ddd-11dd-93dc-0050c2490048	59737.7	kg	FAOstat - Pesticide usage data	Eurostat - harvested areas	Literature	Method F	Pesticides				3.11282e-07									102.339			0	0	0	0.0185953	0	0	0	0	0	0	0	0	6.1135e+06	0	0	0	0	0	6.9154e-08	0	0	0
MCPB	MCPB	Pesticides (soil)	Emissions to soil	Emissions to soil, unspecified	4d9a8790-3ddd-11dd-93db-0050c2490048	283977	kg	FAOstat - Pesticide usage data	Eurostat - harvested areas	Literature	Method F	Pesticides				8.67647e-08									266.853			0	0	0	0.0246392	0	0	0	0	0	0	0	0	7.57801e+07	0	0	0	0	0	9.16305e-08	0	0	0
mecoprop	Mecoprop	Pesticides (surface water)	Emissions to water	Emissions to water, unspecified	730fd192-4a02-49ea-8796-9fb115b5e0bc	6595.61	kg	Literature	Eurostat - harvested areas	Not applicable	Method F	Pesticides													301.983			0	0	0	0	0	0	0	0	0	0	0	0	1.99176e+06	0	0	0	0	0	0	0	0	0
mecoprop	Mecoprop	Pesticides (air)	Emissions to air	Emissions to air, unspecified	4d9a8790-3ddd-11dd-8f52-0050c2490048	98934.2	kg	FAOstat - Pesticide usage data	Eurostat - harvested areas	Literature	Method F	Pesticides				4.19663e-06									88.1377			0	0	0	0.41519	0	0	0	0	0	0	0	0	8.71983e+06	0	0	0	0	0	1.54405e-06	0	0	0
mecoprop	Mecoprop	Pesticides (soil)	Emissions to soil	Emissions to soil, unspecified	3537f7a9-8f74-4c7e-b7e5-1cef662fea85	477346	kg	FAOstat - Pesticide usage data	Eurostat - harvested areas	Literature	Method F	Pesticides													89.1496			0	0	0	0	0	0	0	0	0	0	0	0	4.25552e+07	0	0	0	0	0	0	0	0	0
mefenoxam	Metalaxyl-M	Pesticides (surface water)	Emissions to water	Emissions to water, unspecified	4d9a8790-3ddd-11dd-9323-0050c2490048	246.328	kg	Literature	Eurostat - harvested areas	Not applicable	Method F	Pesticides													2161.13			0	0	0	0	0	0	0	0	0	0	0	0	532347	0	0	0	0	0	0	0	0	0
mefenoxam	Metalaxyl-M	Pesticides (air)	Emissions to air	Emissions to air, unspecified	08a91e70-3ddc-11dd-932c-0050c2490048	3694.92	kg	FAOstat - Pesticide usage data	Eurostat - harvested areas	Literature	Method F	Pesticides													137.961			0	0	0	0	0	0	0	0	0	0	0	0	509755	0	0	0	0	0	0	0	0	0
mefenoxam	Metalaxyl-M	Pesticides (soil)	Emissions to soil	Emissions to soil, unspecified	08a91e70-3ddc-11dd-932b-0050c2490048	4926.57	kg	FAOstat - Pesticide usage data	Eurostat - harvested areas	Literature	Method F	Pesticides													507.883			0	0	0	0	0	0	0	0	0	0	0	0	2.50212e+06	0	0	0	0	0	0	0	0	0
mercury	mercury II		emissions to water	emissions to water, unspecified	fe0acd60-3ddc-11dd-a8ca-0050c2490048	0	kg	Not applicable	Not applicable	Not applicable	Not applicable				0.00012008	0.0142144									22085.6			0	0	0	0	0	0	0	0	0	0	0	0	0	0	0	0	0	0	0	0	0	0
mercury	Mercury	Non-industrial releases	emissions to water	emissions to water, unspecified	fe0acd60-3ddc-11dd-a8ca-0050c2490048	1009.01	kg	Waterbase	Eurostat - WWTP-connection stats	Not applicable	Method D2	Toxic waterborne emissions			0.00012008	0.0142144									22085.6			0	0	0.121162	14.3424	0	0	0	0	0	0	0	0	2.22845e+07	0	0	0	0	6.45238e-06	5.33379e-05	0	0	0
mercury	Mercury and compounds (as Hg)	Industrial releases	emissions to soil	emissions to soil, unspecified	08a91e70-3ddc-11dd-95f9-0050c2490048	96	kg	E-PRTR	EUROSTAT - economic data	Not applicable	Method E				8.48018e-05	0.0100383									15597.1			0	0	0.00814097	0.963679	0	0	0	0	0	0	0	0	1.49732e+06	0	0	0	0	4.33541e-07	3.58382e-06	0	0	0
mercury	Mercury	sludge	emissions to soil	emissions to soil, unspecified	08a91e70-3ddc-11dd-95f9-0050c2490048	5340.28	kg	Eurostat - sewage sludge usage	Literature	Not applicable	Method E				8.48018e-05	0.0100383									15597.1			0	0	0.452866	53.6075	0	0	0	0	0	0	0	0	8.32928e+07	0	0	0	0	2.4117e-05	0.000199361	0	0	0
mercury	Mercury ores - metal content	metal content	resource flows	Non-renewable element resources from ground	fe0acd60-3ddc-11dd-a8cd-0050c2490048	9000	kg	British Geological Survey	Not applicable	Not applicable	Method K3																2.62	0	0	0	0	0	0	0	0	0	0	0	0	0	0	23580	0	0	0	0	0	0	0
mercury	Mercury and compounds (as Hg)	Industrial releases	emissions to water	emissions to water, unspecified	fe0acd60-3ddc-11dd-a8ca-0050c2490048	10252.8	kg	E-PRTR	EUROSTAT - economic data	Not applicable	Method D1	Toxic waterborne emissions			0.00012008	0.0142144									22085.6			0	0	1.23115	145.736	0	0	0	0	0	0	0	0	2.26438e+08	0	0	0	0	6.55641e-05	0.000541978	0	0	0
mercury	Mercury	manure	emissions to soil	emissions to soil, unspecified	08a91e70-3ddc-11dd-95f9-0050c2490048	23144.6	kg	FAOstat - manure application	Literature	Not applicable	Method E				8.48018e-05	0.0100383									15597.1			0	0	1.96271	232.333	0	0	0	0	0	0	0	0	3.60988e+08	0	0	0	0	0.000104522	0.000864023	0	0	0
Mercury	Hg		emissions to air	emissions to air, unspecified	fe0acd60-3ddc-11dd-a8c4-0050c2490048	74566.9	kg	EMEP	E-PRTR	Not applicable	Method C	Toxic airborne emissions			0.0070553	0.834928									12181.6			0	0	526.091	62258	0	0	0	0	0	0	0	0	9.08344e+08	0	0	0	0	0.0280166	0.231531	0	0	0
metalaxil	Metalaxyl	Pesticides (surface water)	Emissions to water	Emissions to water, unspecified	08a91e70-3ddc-11dd-a1fc-0050c2490048	156.848	kg	Literature	Eurostat - harvested areas	Not applicable	Method F	Pesticides				6.03235e-07									957.8			0	0	0	9.46164e-05	0	0	0	0	0	0	0	0	150229	0	0	0	0	0	3.51869e-10	0	0	0
metalaxil	Metalaxyl	Pesticides (air)	Emissions to air	Emissions to air, unspecified	08a91e70-3ddc-11dd-a1f6-0050c2490048	2352.72	kg	FAOstat - Pesticide usage data	Eurostat - harvested areas	Literature	Method F	Pesticides				2.40133e-07									61.1426			0	0	0	0.000564966	0	0	0	0	0	0	0	0	143852	0	0	0	0	0	2.10105e-09	0	0	0
metalaxil	Metalaxyl	Pesticides (soil)	Emissions to soil	Emissions to soil, unspecified	08a91e70-3ddc-11dd-95fa-0050c2490048	3136.97	kg	FAOstat - Pesticide usage data	Eurostat - harvested areas	Literature	Method F	Pesticides				1.42123e-07									225.091			0	0	0	0.000445835	0	0	0	0	0	0	0	0	706104	0	0	0	0	0	1.65801e-09	0	0	0
metamitron	Metamitron	Pesticides (surface water)	Emissions to water	Emissions to water, unspecified	08a91e70-3ddc-11dd-9605-0050c2490048	2605.9	kg	FAOstat - Pesticide usage data	Eurostat - harvested areas	Eurostat - organic farming areas	Method F	Pesticides													497.535			0	0	0	0	0	0	0	0	0	0	0	0	1.29652e+06	0	0	0	0	0	0	0	0	0
metamitron	Metamitron	Pesticides (air)	Emissions to air	Emissions to air, unspecified	08a91e70-3ddc-11dd-95ff-0050c2490048	39088.5	kg	FAOstat - Pesticide usage data	Eurostat - harvested areas	Literature	Method F	Pesticides													15.6689			0	0	0	0	0	0	0	0	0	0	0	0	612474	0	0	0	0	0	0	0	0	0
metamitron	Metamitron	Pesticides (soil)	Emissions to soil	Emissions to soil, unspecified	08a91e70-3ddc-11dd-95fe-0050c2490048	192836	kg	FAOstat - Pesticide usage data	Eurostat - harvested areas	Eurostat - organic farming areas	Method F	Pesticides													23.1639			0	0	0	0	0	0	0	0	0	0	0	0	4.46684e+06	0	0	0	0	0	0	0	0	0
metazachlor	metazachlor		emissions to water	emissions to water, unspecified	08a91e70-3ddc-11dd-a011-0050c2490048	0	kg	Not applicable	Not applicable	Not applicable	Not applicable														7363.86			0	0	0	0	0	0	0	0	0	0	0	0	0	0	0	0	0	0	0	0	0	0
metazachlor	Metazachlor	Pesticides (surface water)	Emissions to water	Emissions to water, unspecified	08a91e70-3ddc-11dd-a011-0050c2490048	18918.4	kg	Literature	Eurostat - harvested areas	Not applicable	Method F	Pesticides													7363.86			0	0	0	0	0	0	0	0	0	0	0	0	1.39313e+08	0	0	0	0	0	0	0	0	0
metazachlor	Metazachlor	Pesticides (air)	Emissions to air	Emissions to air, unspecified	08a91e70-3ddc-11dd-a00b-0050c2490048	283776	kg	FAOstat - Pesticide usage data	Eurostat - harvested areas	Literature	Method F	Pesticides													115.371			0	0	0	0	0	0	0	0	0	0	0	0	3.27397e+07	0	0	0	0	0	0	0	0	0
metazachlor	Metazachlor	Pesticides (soil)	Emissions to soil	Emissions to soil, unspecified	08a91e70-3ddc-11dd-a00a-0050c2490048	1.39961e+06	kg	FAOstat - Pesticide usage data	Eurostat - harvested areas	Literature	Method F	Pesticides													220.374			0	0	0	0	0	0	0	0	0	0	0	0	3.08438e+08	0	0	0	0	0	0	0	0	0
methabenzthiazuron	Methabenzthiazuron		emissions to water	emissions to water, unspecified	fe0acd60-3ddc-11dd-af9c-0050c2490048	0	kg	Not applicable	Not applicable	Not applicable	Not applicable														15557.2			0	0	0	0	0	0	0	0	0	0	0	0	0	0	0	0	0	0	0	0	0	0
methabenzthiazuron	Methabenzthiazuron	Pesticides (surface water)	Emissions to water	Emissions to water, unspecified	fe0acd60-3ddc-11dd-af9c-0050c2490048	577.103	kg	Literature	Eurostat - harvested areas	Not applicable	Method F	Pesticides													15557.2			0	0	0	0	0	0	0	0	0	0	0	0	8.97813e+06	0	0	0	0	0	0	0	0	0
methabenzthiazuron	Methabenzthiazuron	Pesticides (air)	Emissions to air	Emissions to air, unspecified	4d9a8790-3ddd-11dd-96e0-0050c2490048	8656.55	kg	FAOstat - Pesticide usage data	Eurostat - harvested areas	Literature	Method F	Pesticides													268.378			0	0	0	0	0	0	0	0	0	0	0	0	2.32323e+06	0	0	0	0	0	0	0	0	0
methabenzthiazuron	Methabenzthiazuron	Pesticides (soil)	Emissions to soil	Emissions to soil, unspecified	4d9a8790-3ddd-11dd-96df-0050c2490048	39721.1	kg	FAOstat - Pesticide usage data	Eurostat - harvested areas	Literature	Method F	Pesticides													458.779			0	0	0	0	0	0	0	0	0	0	0	0	1.82232e+07	0	0	0	0	0	0	0	0	0
methacrylate	methacrylate		emissions to water	emissions to water, unspecified	e2fb79f4-6555-11dd-ad8b-0800200c9a66	0	kg	Not applicable	Not applicable	Not applicable	Not applicable														672.694			0	0	0	0	0	0	0	0	0	0	0	0	0	0	0	0	0	0	0	0	0	0
methacrylate	methacrylate		emissions to soil	emissions to soil, unspecified	e2fb79f3-6555-11dd-ad8b-0800200c9a66	0	kg	Not applicable	Not applicable	Not applicable	Not applicable														86.426			0	0	0	0	0	0	0	0	0	0	0	0	0	0	0	0	0	0	0	0	0	0
methamidophos	Methamidophos	Pesticides (surface water)	Emissions to water	Emissions to water, unspecified	08a91e70-3ddc-11dd-a212-0050c2490048	578.864	kg	Literature	Eurostat - harvested areas	Not applicable	Method F	Pesticides				3.04004e-05									9950.88			0	0	0	0.0175977	0	0	0	0	0	0	0	0	5.7602e+06	0	0	0	0	0	6.54439e-08	0	0	0
methamidophos	Methamidophos	Pesticides (air)	Emissions to air	Emissions to air, unspecified	08a91e70-3ddc-11dd-a20c-0050c2490048	8682.96	kg	FAOstat - Pesticide usage data	Eurostat - harvested areas	Literature	Method F	Pesticides				1.55751e-05									643.73			0	0	0	0.135238	0	0	0	0	0	0	0	0	5.58948e+06	0	0	0	0	0	5.02935e-07	0	0	0
methamidophos	Methamidophos	Pesticides (soil)	Emissions to soil	Emissions to soil, unspecified	08a91e70-3ddc-11dd-a20b-0050c2490048	11577.3	kg	FAOstat - Pesticide usage data	Eurostat - harvested areas	Literature	Method F	Pesticides				8.4645e-06									2770.65			0	0	0	0.0979959	0	0	0	0	0	0	0	0	3.20766e+07	0	0	0	0	0	3.64436e-07	0	0	0
methane	CH4	only from LULUCF	emissions to air	emissions to air, unspecified	08a91e70-3ddc-11dd-960b-0050c2490048	2.2673e+08	kg	UNFCCC GHG	Not applicable	Not applicable	Method S1		25						0.0101									5.66825e+09	0	0	0	0	0	2.28997e+06	0	0	0	0	0	0	0	0	0.00123212	0	0	0	0	0	0.000144872
methane	CH4	total excl LULUCF	emissions to air	emissions to air, unspecified	08a91e70-3ddc-11dd-960b-0050c2490048	1.86963e+10	kg	UNFCCC GHG	Not applicable	Not applicable	Method S1		25						0.0101									4.67407e+11	0	0	0	0	0	1.88832e+08	0	0	0	0	0	0	0	0	0.101601	0	0	0	0	0	0.0119462
methane (biogenic)	CH4, from biomass burning		emissions to air	emissions to air, unspecified	fe0acd60-3ddc-11dd-a8e8-0050c2490048	8.1697e+07	kg	UNFCCC GHG	Not applicable	Not applicable	Method S1		25						0.0101									2.04243e+09	0	0	0	0	0	825140	0	0	0	0	0	0	0	0	0.000443965	0	0	0	0	0	5.22014e-05
methanol	methanol		emissions to water	emissions to water, unspecified	fe0acd60-3ddc-11dd-a93b-0050c2490048	0	kg	Not applicable	Not applicable	Not applicable	Not applicable					1.05351e-08									2.64704			0	0	0	0	0	0	0	0	0	0	0	0	0	0	0	0	0	0	0	0	0	0
methanol	methanol		emissions to soil	emissions to soil, unspecified	fe0acd60-3ddc-11dd-a934-0050c2490048	0	kg	Not applicable	Not applicable	Not applicable	Not applicable					2.927e-09									0.510873			0	0	0	0	0	0	0	0	0	0	0	0	0	0	0	0	0	0	0	0	0	0
methanol	methanol		emissions to air	emissions to air, unspecified	fe0acd60-3ddc-11dd-a935-0050c2490048	1.66481e+07	kg	EMEP	E-PRTR	Literature	Method A	NMVOC breakdown estimates				1.02297e-08			0.236						0.223958			0	0	0	0.170305	0	0	3.92895e+06	0	0	0	0	0	3.72848e+06	0	0	0	0	0	6.33347e-07	0	0	0.00024856
methidathion	Methidathion	Pesticides (surface water)	Emissions to water	Emissions to water, unspecified	4d9a8790-3ddd-11dd-9350-0050c2490048	666.209	kg	Literature	Eurostat - harvested areas	Not applicable	Method F	Pesticides			2.87473e-05	2.77455e-05									160436			0	0	0.0191517	0.0184843	0	0	0	0	0	0	0	0	1.06884e+08	0	0	0	0	1.01991e-06	6.87412e-08	0	0	0
methidathion	Methidathion	Pesticides (air)	Emissions to air	Emissions to air, unspecified	4d9a8790-3ddd-11dd-934a-0050c2490048	9993.13	kg	FAOstat - Pesticide usage data	Eurostat - harvested areas	Literature	Method F	Pesticides			4.58841e-06	4.42851e-06									4177.57			0	0	0.0458526	0.0442547	0	0	0	0	0	0	0	0	4.1747e+07	0	0	0	0	2.44184e-06	1.64578e-07	0	0	0
methidathion	Methidathion	Pesticides (soil)	Emissions to soil	Emissions to soil, unspecified	4d9a8790-3ddd-11dd-9349-0050c2490048	13324.2	kg	FAOstat - Pesticide usage data	Eurostat - harvested areas	Literature	Method F	Pesticides			7.0085e-06	6.76426e-06									39055.4			0	0	0.0933825	0.0901282	0	0	0	0	0	0	0	0	5.20381e+08	0	0	0	0	4.97301e-06	3.35177e-07	0	0	0
methiocarb	methiocarb		emissions to water	emissions to water, unspecified	08a91e70-3ddc-11dd-a239-0050c2490048	0	kg	Not applicable	Not applicable	Not applicable	Not applicable					2.88677e-06									181053			0	0	0	0	0	0	0	0	0	0	0	0	0	0	0	0	0	0	0	0	0	0
methiocarb	Methiocarb	Pesticides (surface water)	Emissions to water	Emissions to water, unspecified	08a91e70-3ddc-11dd-a239-0050c2490048	1844.68	kg	FAOstat - Pesticide usage data	Eurostat - harvested areas	Eurostat - organic farming areas	Method F	Pesticides				2.88677e-06									181053			0	0	0	0.00532515	0	0	0	0	0	0	0	0	3.33983e+08	0	0	0	0	0	1.98037e-08	0	0	0
methiocarb	Methiocarb	Pesticides (air)	Emissions to air	Emissions to air, unspecified	08a91e70-3ddc-11dd-a233-0050c2490048	27670.1	kg	FAOstat - Pesticide usage data	Eurostat - harvested areas	Literature	Method F	Pesticides				1.2881e-06									8485.93			0	0	0	0.0356419	0	0	0	0	0	0	0	0	2.34807e+08	0	0	0	0	0	1.32548e-07	0	0	0
methiocarb	Methiocarb	Pesticides (soil)	Emissions to soil	Emissions to soil, unspecified	08a91e70-3ddc-11dd-a232-0050c2490048	36893.5	kg	FAOstat - Pesticide usage data	Eurostat - harvested areas	Eurostat - organic farming areas	Method F	Pesticides				2.25036e-07									14094.5			0	0	0	0.00830236	0	0	0	0	0	0	0	0	5.19997e+08	0	0	0	0	0	3.08756e-08	0	0	0
methomyl	methomyl		emissions to water	emissions to water, unspecified	fe0acd60-3ddc-11dd-a946-0050c2490048	0	kg	Not applicable	Not applicable	Not applicable	Not applicable					1.2191e-05									28978.8			0	0	0	0	0	0	0	0	0	0	0	0	0	0	0	0	0	0	0	0	0	0
methomyl	Methomyl	Pesticides (surface water)	Emissions to water	Emissions to water, unspecified	fe0acd60-3ddc-11dd-a946-0050c2490048	2665.59	kg	Literature	Eurostat - harvested areas	Not applicable	Method F	Pesticides				1.2191e-05									28978.8			0	0	0	0.0324963	0	0	0	0	0	0	0	0	7.72456e+07	0	0	0	0	0	1.2085e-07	0	0	0
methomyl	Methomyl	Pesticides (air)	Emissions to air	Emissions to air, unspecified	fe0acd60-3ddc-11dd-a940-0050c2490048	39983.8	kg	FAOstat - Pesticide usage data	Eurostat - harvested areas	Literature	Method F	Pesticides				1.03927e-05									3280.64			0	0	0	0.41554	0	0	0	0	0	0	0	0	1.31172e+08	0	0	0	0	0	1.54535e-06	0	0	0
methomyl	Methomyl	Pesticides (soil)	Emissions to soil	Emissions to soil, unspecified	fe0acd60-3ddc-11dd-a93f-0050c2490048	53311.8	kg	FAOstat - Pesticide usage data	Eurostat - harvested areas	Literature	Method F	Pesticides				2.23172e-06									5304.73			0	0	0	0.118977	0	0	0	0	0	0	0	0	2.82805e+08	0	0	0	0	0	4.42463e-07	0	0	0
methoprotryne	Methoprotryne	Pesticides (surface water)	Emissions to water	Emissions to water, unspecified	7413c1a4-6b87-4df6-9dcb-d6a7af4552e4	54.17	kg	FAOstat - Pesticide usage data	Eurostat - harvested areas	Eurostat - organic farming areas	Method F	Pesticides													2492.37			0	0	0	0	0	0	0	0	0	0	0	0	135012	0	0	0	0	0	0	0	0	0
methoprotryne	Methoprotryne	Pesticides (air)	Emissions to air	Emissions to air, unspecified	c63ea4cd-a1ca-428d-9bc0-c4ce0f14b5bc	812.55	kg	FAOstat - Pesticide usage data	Eurostat - harvested areas	Literature	Method F	Pesticides													62.4767			0	0	0	0	0	0	0	0	0	0	0	0	50765.5	0	0	0	0	0	0	0	0	0
methoprotryne	Methoprotryne	Pesticides (soil)	Emissions to soil	Emissions to soil, unspecified	312711c8-8385-4e63-90d5-80e22a4dfc69	4008.58	kg	FAOstat - Pesticide usage data	Eurostat - harvested areas	Eurostat - organic farming areas	Method F	Pesticides													189.794			0	0	0	0	0	0	0	0	0	0	0	0	760805	0	0	0	0	0	0	0	0	0
methoxyfenozide	Methoxyfenozide	Pesticides (surface water)	Emissions to water	Emissions to water, unspecified	4d9a8790-3ddd-11dd-93a7-0050c2490048	69.83	kg	Literature	Eurostat - harvested areas	Not applicable	Method F	Pesticides													50096.2			0	0	0	0	0	0	0	0	0	0	0	0	3.49822e+06	0	0	0	0	0	0	0	0	0
methoxyfenozide	Methoxyfenozide	Pesticides (air)	Emissions to air	Emissions to air, unspecified	4d9a8790-3ddd-11dd-93a1-0050c2490048	1047.45	kg	FAOstat - Pesticide usage data	Eurostat - harvested areas	Literature	Method F	Pesticides													1652.39			0	0	0	0	0	0	0	0	0	0	0	0	1.7308e+06	0	0	0	0	0	0	0	0	0
methoxyfenozide	Methoxyfenozide	Pesticides (soil)	Emissions to soil	Emissions to soil, unspecified	4d9a8790-3ddd-11dd-93a0-0050c2490048	1396.6	kg	FAOstat - Pesticide usage data	Eurostat - harvested areas	Literature	Method F	Pesticides													1388.8			0	0	0	0	0	0	0	0	0	0	0	0	1.9396e+06	0	0	0	0	0	0	0	0	0
methyl acetate	methylacetate		emissions to air	emissions to air, unspecified	08a91e70-3ddc-11dd-9690-0050c2490048	7.77521e+06	kg	EMEP	E-PRTR	Literature	Method A	NMVOC breakdown estimates							0.0997						0.576223			0	0	0	0	0	0	775188	0	0	0	0	0	4.48026e+06	0	0	0	0	0	0	0	0	4.90412e-05
methyl acetylene	propyne		emissions to air	emissions to air, unspecified	08a91e70-3ddc-11dd-9694-0050c2490048	2.17786e+06	kg	EMEP	E-PRTR	Literature	Method A	NMVOC breakdown estimates																0	0	0	0	0	0	0	0	0	0	0	0	0	0	0	0	0	0	0	0	0	0
methyl cyclohexane	methylcyclohexane		emissions to air	emissions to air, unspecified	fe0acd60-3ddc-11dd-afbb-0050c2490048	2.66812e+06	kg	EMEP	E-PRTR	Literature	Method A	NMVOC breakdown estimates													0.000323573			0	0	0	0	0	0	0	0	0	0	0	0	863.332	0	0	0	0	0	0	0	0	0
methyl ethyl ketone	methyl ethyl ketone		emissions to water	emissions to water, unspecified	08a91e70-3ddc-11dd-a24b-0050c2490048	0	kg	Not applicable	Not applicable	Not applicable	Not applicable					7.56814e-09									1.57067			0	0	0	0	0	0	0	0	0	0	0	0	0	0	0	0	0	0	0	0	0	0
methyl ethyl ketone	methyl ethyl ketone		emissions to soil	emissions to soil, unspecified	08a91e70-3ddc-11dd-a248-0050c2490048	0	kg	Not applicable	Not applicable	Not applicable	Not applicable					1.46994e-09									0.282373			0	0	0	0	0	0	0	0	0	0	0	0	0	0	0	0	0	0	0	0	0	0
methyl ethyl ketone	methyl ethyl ketone		emissions to air	emissions to air, unspecified	fe0acd60-3ddc-11dd-afc7-0050c2490048	1.75951e+07	kg	EMEP	E-PRTR	Literature	Method A	NMVOC breakdown estimates				9.03046e-10			0.63						0.0577059			0	0	0	0.0158892	0	0	1.10849e+07	0	0	0	0	0	1.01534e+06	0	0	0	0	0	5.90903e-08	0	0	0.000701273
methyl formate	methyl formate	missing	emissions to air	emissions to air, unspecified	fe0acd60-3ddc-11dd-afcf-0050c2490048	0	kg	Not applicable	Not applicable	Not applicable	missing								0.0456						0.529015			0	0	0	0	0	0	0	0	0	0	0	0	0	0	0	0	0	0	0	0	0	0
methyl formate	methyl formate		emissions to water	emissions to water, unspecified	f2146012-6555-11dd-ad8b-0800200c9a66	0	kg	Not applicable	Not applicable	Not applicable	Not applicable														17.6595			0	0	0	0	0	0	0	0	0	0	0	0	0	0	0	0	0	0	0	0	0	0
methyl formate	methyl formate		emissions to soil	emissions to soil, unspecified	f2146011-6555-11dd-ad8b-0800200c9a66	0	kg	Not applicable	Not applicable	Not applicable	Not applicable														2.69699			0	0	0	0	0	0	0	0	0	0	0	0	0	0	0	0	0	0	0	0	0	0
methyl isobutyl ketone	methyl isobutyl ketone		emissions to water	emissions to water, unspecified	fe0acd60-3ddc-11dd-a998-0050c2490048	0	kg	Not applicable	Not applicable	Not applicable	Not applicable					1.92493e-09									6.02567			0	0	0	0	0	0	0	0	0	0	0	0	0	0	0	0	0	0	0	0	0	0
methyl isobutyl ketone	methyl isobutyl ketone		emissions to soil	emissions to soil, unspecified	fe0acd60-3ddc-11dd-a991-0050c2490048	0	kg	Not applicable	Not applicable	Not applicable	Not applicable					3.24625e-10									0.702599			0	0	0	0	0	0	0	0	0	0	0	0	0	0	0	0	0	0	0	0	0	0
methyl isobutyl ketone	methylisobutylketone		emissions to air	emissions to air, unspecified	fe0acd60-3ddc-11dd-a992-0050c2490048	8.40949e+06	kg	EMEP	E-PRTR	Literature	Method A	NMVOC breakdown estimates				2.09731e-09			0.828						0.0207753			0	0	0	0.0176373	0	0	6.96306e+06	0	0	0	0	0	174709	0	0	0	0	0	6.55912e-08	0	0	0.000440508
methyl methacrylate	methyl methacrylate		emissions to water	emissions to water, unspecified	fe0acd60-3ddc-11dd-a9ab-0050c2490048	0	kg	Not applicable	Not applicable	Not applicable	Not applicable					5.40538e-08									13.9357			0	0	0	0	0	0	0	0	0	0	0	0	0	0	0	0	0	0	0	0	0	0
methyl methacrylate	methyl methacrylate		emissions to soil	emissions to soil, unspecified	fe0acd60-3ddc-11dd-a9a4-0050c2490048	0	kg	Not applicable	Not applicable	Not applicable	Not applicable					3.95294e-08									1.45537			0	0	0	0	0	0	0	0	0	0	0	0	0	0	0	0	0	0	0	0	0	0
methyl N-(2,6-dimethylphenyl)-N-(2-furylcarbonyl)-DL-alaninate	Furalaxyl	Pesticides (surface water)	Emissions to water	Emissions to water, unspecified	34189658-f8aa-452d-92d3-57c3a03db34c	156.848	kg	Literature	Eurostat - harvested areas	Not applicable	Method F	Pesticides													920.492			0	0	0	0	0	0	0	0	0	0	0	0	144378	0	0	0	0	0	0	0	0	0
methyl N-(2,6-dimethylphenyl)-N-(2-furylcarbonyl)-DL-alaninate	Furalaxyl	Pesticides (air)	Emissions to air	Emissions to air, unspecified	c3d215d5-3f9d-4b06-b34b-603358ff9085	2352.72	kg	FAOstat - Pesticide usage data	Eurostat - harvested areas	Literature	Method F	Pesticides													18.2299			0	0	0	0	0	0	0	0	0	0	0	0	42889.8	0	0	0	0	0	0	0	0	0
methyl N-(2,6-dimethylphenyl)-N-(2-furylcarbonyl)-DL-alaninate	Furalaxyl	Pesticides (soil)	Emissions to soil	Emissions to soil, unspecified	b4be513e-4dcf-4e79-b8f1-66c50eb6a0c3	3136.97	kg	FAOstat - Pesticide usage data	Eurostat - harvested areas	Literature	Method F	Pesticides													59.1809			0	0	0	0	0	0	0	0	0	0	0	0	185648	0	0	0	0	0	0	0	0	0
methyl parathion	methyl parathion		emissions to water	emissions to water, unspecified	fe0acd60-3ddc-11dd-a9ba-0050c2490048	0	kg	Not applicable	Not applicable	Not applicable	Not applicable					7.06548e-05									65122.5			0	0	0	0	0	0	0	0	0	0	0	0	0	0	0	0	0	0	0	0	0	0
methyl parathion	Parathion-Methyl	Pesticides (surface water)	Emissions to water	Emissions to water, unspecified	fe0acd60-3ddc-11dd-a9ba-0050c2490048	578.864	kg	Literature	Eurostat - harvested areas	Not applicable	Method F	Pesticides				7.06548e-05									65122.5			0	0	0	0.0408995	0	0	0	0	0	0	0	0	3.76971e+07	0	0	0	0	0	1.52101e-07	0	0	0
methyl parathion	Parathion-Methyl	Pesticides (air)	Emissions to air	Emissions to air, unspecified	fe0acd60-3ddc-11dd-a9b4-0050c2490048	8682.96	kg	FAOstat - Pesticide usage data	Eurostat - harvested areas	Literature	Method F	Pesticides				9.59641e-06									797.856			0	0	0	0.0833252	0	0	0	0	0	0	0	0	6.92775e+06	0	0	0	0	0	3.09878e-07	0	0	0
methyl parathion	Parathion-Methyl	Pesticides (soil)	Emissions to soil	Emissions to soil, unspecified	fe0acd60-3ddc-11dd-a9b3-0050c2490048	11577.3	kg	FAOstat - Pesticide usage data	Eurostat - harvested areas	Literature	Method F	Pesticides				1.37526e-06									1240.17			0	0	0	0.0159218	0	0	0	0	0	0	0	0	1.43578e+07	0	0	0	0	0	5.92114e-08	0	0	0
methylamine	methylamine		emissions to water	emissions to water, unspecified	d86cd6e6-6555-11dd-ad8b-0800200c9a66	0	kg	Not applicable	Not applicable	Not applicable	Not applicable														44.5994			0	0	0	0	0	0	0	0	0	0	0	0	0	0	0	0	0	0	0	0	0	0
methylamine	methylamine		emissions to soil	emissions to soil, unspecified	d86cd6e5-6555-11dd-ad8b-0800200c9a66	0	kg	Not applicable	Not applicable	Not applicable	Not applicable														7.68339			0	0	0	0	0	0	0	0	0	0	0	0	0	0	0	0	0	0	0	0	0	0
methylglyoxal	methylglyoxal	NMVOC	emissions to air	emissions to air, unspecified	fe0acd60-3ddc-11dd-a98c-0050c2490048	581920	kg	EMEP	E-PRTR	Literature	Method A	NMVOC breakdown estimates																0	0	0	0	0	0	0	0	0	0	0	0	0	0	0	0	0	0	0	0	0	0
metiram	metiram		emissions to water	emissions to water, unspecified	afd79568-a7be-47a9-8ef3-f7d405de1669	0	kg	Not applicable	Not applicable	Not applicable	Not applicable					1.82535e-07									2054.55			0	0	0	0	0	0	0	0	0	0	0	0	0	0	0	0	0	0	0	0	0	0
metiram	Metiram	Pesticides (surface water)	Emissions to water	Emissions to water, unspecified	afd79568-a7be-47a9-8ef3-f7d405de1669	24250.4	kg	Literature	Eurostat - harvested areas	Not applicable	Method F	Pesticides				1.82535e-07									2054.55			0	0	0	0.00442654	0	0	0	0	0	0	0	0	4.98237e+07	0	0	0	0	0	1.64619e-08	0	0	0
metiram	Metiram	Pesticides (air)	Emissions to air	Emissions to air, unspecified	c962acdf-c2e0-4fea-a159-d0c04db671ff	363756	kg	FAOstat - Pesticide usage data	Eurostat - harvested areas	Literature	Method F	Pesticides				8.45772e-07									42.516			0	0	0	0.307655	0	0	0	0	0	0	0	0	1.54655e+07	0	0	0	0	0	1.14414e-06	0	0	0
metiram	Metiram	Pesticides (soil)	Emissions to soil	Emissions to soil, unspecified	1654581c-8123-4841-852b-d347137f976e	485008	kg	FAOstat - Pesticide usage data	Eurostat - harvested areas	Literature	Method F	Pesticides				3.75923e-11									0.423126			0	0	0	1.82326e-05	0	0	0	0	0	0	0	0	205220	0	0	0	0	0	6.7805e-11	0	0	0
metobromuron	Metobromuron	Pesticides (surface water)	Emissions to water	Emissions to water, unspecified	fe0acd60-3ddc-11dd-afe7-0050c2490048	577.103	kg	Literature	Eurostat - harvested areas	Not applicable	Method F	Pesticides													1347.46			0	0	0	0	0	0	0	0	0	0	0	0	777623	0	0	0	0	0	0	0	0	0
metobromuron	Metobromuron	Pesticides (air)	Emissions to air	Emissions to air, unspecified	08a91e70-3ddc-11dd-92e4-0050c2490048	8656.55	kg	FAOstat - Pesticide usage data	Eurostat - harvested areas	Literature	Method F	Pesticides													77.7942			0	0	0	0	0	0	0	0	0	0	0	0	673429	0	0	0	0	0	0	0	0	0
metobromuron	Metobromuron	Pesticides (soil)	Emissions to soil	Emissions to soil, unspecified	08a91e70-3ddc-11dd-92e3-0050c2490048	39721.1	kg	FAOstat - Pesticide usage data	Eurostat - harvested areas	Literature	Method F	Pesticides													154.953			0	0	0	0	0	0	0	0	0	0	0	0	6.1549e+06	0	0	0	0	0	0	0	0	0
metolachlor	Metolachlor	Pesticides (surface water)	Emissions to water	Emissions to water, unspecified	fe0acd60-3ddc-11dd-afd1-0050c2490048	3117.44	kg	Literature	Eurostat - harvested areas	Not applicable	Method F	Pesticides				1.27188e-06									67251.8			0	0	0	0.003965	0	0	0	0	0	0	0	0	2.09653e+08	0	0	0	0	0	1.47454e-08	0	0	0
metolachlor	Metolachlor	Pesticides (air)	Emissions to air	Emissions to air, unspecified	fe0acd60-3ddc-11dd-afec-0050c2490048	46761.6	kg	FAOstat - Pesticide usage data	Eurostat - harvested areas	Literature	Method F	Pesticides				2.19109e-07									1531.69			0	0	0	0.0102459	0	0	0	0	0	0	0	0	7.16245e+07	0	0	0	0	0	3.81034e-08	0	0	0
metolachlor	Metolachlor	Pesticides (soil)	Emissions to soil	Emissions to soil, unspecified	fe0acd60-3ddc-11dd-afeb-0050c2490048	230691	kg	FAOstat - Pesticide usage data	Eurostat - harvested areas	Literature	Method F	Pesticides				1.13047e-07									5957.96			0	0	0	0.0260788	0	0	0	0	0	0	0	0	1.37444e+09	0	0	0	0	0	9.69844e-08	0	0	0
metolachlor (s-isomer)	S-Metolachlor	Pesticides (surface water)	Emissions to water	Emissions to water, unspecified	08a91e70-3ddc-11dd-9ad4-0050c2490048	15631.8	kg	Literature	Eurostat - harvested areas	Not applicable	Method F	Pesticides													114699			0	0	0	0	0	0	0	0	0	0	0	0	1.79295e+09	0	0	0	0	0	0	0	0	0
metolachlor (s-isomer)	S-Metolachlor	Pesticides (air)	Emissions to air	Emissions to air, unspecified	08a91e70-3ddc-11dd-90d8-0050c2490048	234476	kg	FAOstat - Pesticide usage data	Eurostat - harvested areas	Literature	Method F	Pesticides													2611.58			0	0	0	0	0	0	0	0	0	0	0	0	6.12354e+08	0	0	0	0	0	0	0	0	0
metolachlor (s-isomer)	S-Metolachlor	Pesticides (soil)	Emissions to soil	Emissions to soil, unspecified	08a91e70-3ddc-11dd-90d7-0050c2490048	1.15675e+06	kg	FAOstat - Pesticide usage data	Eurostat - harvested areas	Literature	Method F	Pesticides													10161.4			0	0	0	0	0	0	0	0	0	0	0	0	1.17542e+10	0	0	0	0	0	0	0	0	0
metoxuron	Metoxuron	Pesticides (surface water)	Emissions to water	Emissions to water, unspecified	70f7a32e-a009-4fd5-8dcd-4f28e1c4fd2f	577.103	kg	Literature	Eurostat - harvested areas	Not applicable	Method F	Pesticides													125.152			0	0	0	0	0	0	0	0	0	0	0	0	72225.5	0	0	0	0	0	0	0	0	0
[truncated: 676 more rows]
[truncated: 8 more columns]

## Sheet: unmapped_20150413
Sum of Inventory value2 [kg]	Column Labels
Row Labels	emissions to air, unspecified	emissions to soil, unspecified	emissions to water, unspecified	Grand Total
Adsorbable organic halogens (AOX)			131428	131428
[truncated: 314 more rows]

## Sheet: inventory only
Name of flow data set - ILCD compliant	Name of flow data set - Statistics	Additional Specification	Compartment	Elementary flow category, level 3	UUID	Inventory 2010	Unit	Source 1	Source 2	Source 3	Inventory.Method	Method short name
[truncated: 266 more rows]
